# Supplementary material for: One-pot bifunctionalization of unactivated alkenes, P(O)–H compounds, and N-methoxypyridinium salts for the construction of β-pyridyl alkylphosphonates
Source: Royal Society of Chemistry journal article supplement (doi:10.1039/c8qo00689j), 2018-01-01
Supplement: c8qo00689j1.pdf [file c8qo00689j1.pdf]

## *Supporting Information*

# **One-Pot Bifunctionalization of Unactivated Alkenes, P(O)–H Compounds, and *N*-Heteroarenium Salts for the Construction of $\beta$ -Pyridyl Alkylphosphonates**

*Yu-Tao He,<sup>†</sup> Joonghee Won,<sup>†</sup> Jiyun Kim, Bohyun Park, Taehwan Kim, Mu-Hyun Baik\* and Sungwoo Hong\**

*Center for Catalytic Hydrocarbon Functionalizations, Institute for Basic Science (IBS),  
Daejeon 34141, Republic of Korea.*

*Department of Chemistry, Korea Advanced Institute of Science and Technology (KAIST),  
Daejeon 34141, Republic of Korea.*

*<sup>†</sup>These authors contributed equally*

|                                                    |     |
|----------------------------------------------------|-----|
| <b>I. General Methods and Materials</b>            | S2  |
| <b>II. Optimization of the reaction conditions</b> | S2  |
| <b>III. General experimental Procedure</b>         | S4  |
| <b>IV. Control Experiments</b>                     | S4  |
| <b>V. Compound Characterizations</b>               | S7  |
| <b>VI. Computational Details</b>                   | S38 |
| <b>VII. References</b>                             | S66 |

### *Appendix I*

|                                                                                                              |     |
|--------------------------------------------------------------------------------------------------------------|-----|
| <b>Spectral Copies of <sup>1</sup>H-, <sup>13</sup>C- and <sup>31</sup>P-NMR Data Obtained in this Study</b> | S67 |
|--------------------------------------------------------------------------------------------------------------|-----|

## I. General Methods and Materials.

Unless stated otherwise, reactions were performed in flame-dried glassware. Analytical thin layer chromatography (TLC) was performed on precoated silica gel 60 F<sup>254</sup> plates and visualization on TLC was achieved by UV light (254 and 365 nm). Flash column chromatography was undertaken on silica gel (400-630 mesh). <sup>1</sup>H NMR was recorded on 400 MHz or 600 MHz and chemical shifts were quoted in parts per million (ppm) referenced to the appropriate solvent peak or 0.0 ppm for tetramethylsilane. The following abbreviations were used to describe peak splitting patterns when appropriate: br = broad, s = singlet, d = doublet, t = triplet, q = quartet, m = multiplet, dd = doublet of doublet, td = triplet of doublet, ddd = doublet of doublet of doublet. Coupling constants, *J*, were reported in hertz unit (Hz). <sup>13</sup>C NMR was recorded on 100 MHz or 150 MHz and was fully decoupled by broad band proton decoupling. Signals of <sup>13</sup>C spectra of carbon atom adjacent to phosphorus atom of organophosphorus compounds appeared as a doublet with varied coupling constants between C and P (*J*<sub>CP</sub>). Chemical shifts were reported in ppm referenced to the centerline of a triplet at 77.0 ppm of CDCl<sub>3</sub>. <sup>31</sup>P NMR was recorded on 162 MHz or 243 MHz and was fully decoupled by broad band proton decoupling. Mass spectral data were obtained from the KAIST Basic Science Institute by using ESI method. Commercial grade reagents and solvents were used without further purification except as indicated below.

## II. Optimization of the reaction conditions

Table S1<sup>a</sup>

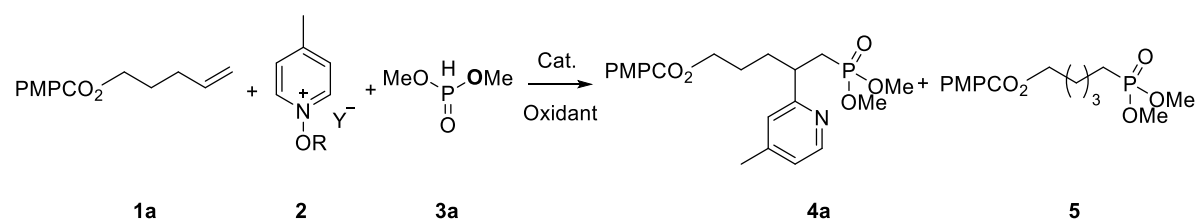

| entry | catalyst<br>(0.2 equiv) | oxidant<br>(1.5 equiv)                  | 2  | solvent | temp/time | yield (%) <sup>b</sup> |
|-------|-------------------------|-----------------------------------------|----|---------|-----------|------------------------|
| 1     | AgNO <sub>3</sub>       | Mn(OAc) <sub>3</sub> ·2H <sub>2</sub> O | 2a | DMF     | 60°C/16 h | 56 (65/35)             |
| 2     | AgNO <sub>3</sub>       | Mn(OAc) <sub>3</sub> ·2H <sub>2</sub> O | 2a | DCM     | 60°C/16 h | 86 (43/57)             |
| 3     | AgNO <sub>3</sub>       | Mn(OAc) <sub>3</sub> ·2H <sub>2</sub> O | 2a | toluene | 60°C/16 h | 68 (>5/95)             |
| 4     | AgNO <sub>3</sub>       | Mn(OAc) <sub>3</sub> ·2H <sub>2</sub> O | 2a | dioxane | 60°C/16 h | 77 (13/87)             |
| 5     | AgNO <sub>3</sub>       | Mn(OAc) <sub>3</sub> ·2H <sub>2</sub> O | 2a | MeCN    | 60°C/16 h | 75 (69/31)             |
| 6     | AgNO <sub>3</sub>       | Mn(OAc) <sub>3</sub> ·2H <sub>2</sub> O | 2b | MeCN    | 60°C/16 h | 80 (69/31)             |
| 7     | AgNO <sub>3</sub>       | Mn(OAc) <sub>3</sub> ·2H <sub>2</sub> O | 2c | MeCN    | 60°C/16 h | 83 (72/28)             |
| 8     | AgNO <sub>3</sub>       | Mn(OAc) <sub>3</sub> ·2H <sub>2</sub> O | 2d | MeCN    | 60°C/16 h | 83 (70/30)             |

|                 |                      |                                              |    |                       |           |            |
|-----------------|----------------------|----------------------------------------------|----|-----------------------|-----------|------------|
| 9               | AgNO <sub>3</sub>    | Mn(OAc) <sub>3</sub> ·2H <sub>2</sub> O      | 2e | MeCN                  | 60°C/16 h | trace      |
| 10              | AgNO <sub>3</sub>    | Mn(OAc) <sub>3</sub> ·2H <sub>2</sub> O      | 2c | MeCN                  | 80°C/16 h | 78 (62/38) |
| 11              | AgNO <sub>3</sub>    | Mn(OAc) <sub>3</sub> ·2H <sub>2</sub> O      | 2c | MeCN                  | rt/30 h   | 88 (81/19) |
| 12              | —                    | Mn(OAc) <sub>3</sub> ·2H <sub>2</sub> O      | 2c | MeCN                  | rt/30 h   | 31 (71/29) |
| 13              | AgNO <sub>3</sub>    | —                                            | 2c | MeCN                  | rt/30 h   | <5%        |
| 14              | AgNO <sub>3</sub>    | Mn(OAc) <sub>3</sub> ·2H <sub>2</sub> O      | 2c | MeCN/H <sub>2</sub> O | 80°C/16 h | 14%        |
| 15              | AgNO <sub>3</sub>    | Mn(OAc) <sub>3</sub> ·2H <sub>2</sub> O      | 2c | MeCN/HOAc             | rt/30 h   | <5%        |
| 16 <sup>c</sup> | AgNO <sub>3</sub>    | —                                            | 2c | MeCN                  | rt/30 h   | 22 (78/22) |
| 17              | AgNO <sub>3</sub>    | DTBP                                         | 2c | MeCN                  | rt/30 h   | 28 (55/45) |
| 18              | AgNO <sub>3</sub>    | K <sub>2</sub> S <sub>2</sub> O <sub>8</sub> | 2c | MeCN                  | rt/30 h   | 11 (89/11) |
| 19              | AgNO <sub>3</sub>    | BPO                                          | 2c | MeCN                  | rt/30 h   | 30 (60/40) |
| 20              | AgNO <sub>3</sub>    | MnO <sub>2</sub>                             | 2c | MeCN                  | rt/30 h   | 25 (65/35) |
| 21              | AgNO <sub>3</sub>    | Mn(OAc) <sub>2</sub>                         | 2c | MeCN                  | rt/30 h   | 25 (65/35) |
| 22              | AgNO <sub>3</sub>    | TBHP                                         | 2c | MeCN                  | rt/30 h   | trace      |
| 23              | AgOAc                | Mn(OAc) <sub>3</sub> ·2H <sub>2</sub> O      | 2c | MeCN                  | rt/30 h   | 86 (79/21) |
| 24              | AgSbF <sub>6</sub>   | Mn(OAc) <sub>3</sub> ·2H <sub>2</sub> O      | 2c | MeCN                  | rt/30 h   | 85 (79/21) |
| 25              | Pd(OAc) <sub>2</sub> | Mn(OAc) <sub>3</sub> ·2H <sub>2</sub> O      | 2c | MeCN                  | rt/30 h   | 20 (78/22) |
| 26              | Cu(OAc) <sub>2</sub> | Mn(OAc) <sub>3</sub> ·2H <sub>2</sub> O      | 2c | MeCN                  | rt/30 h   | trace      |

<sup>a</sup>Reaction conditions: **1a** (0.2 mmol), **2** (0.5 mmol), **3a** (0.4 mmol), Oxidant (0.4 mmol), catalyst (20 mmol %), solvent (1.0 mL), under nitrogen. <sup>b</sup>Yields were determined by <sup>1</sup>H NMR spectroscopy with caffeine as an internal standard. <sup>c</sup>AgNO<sub>3</sub> (1.0 equiv) was used.

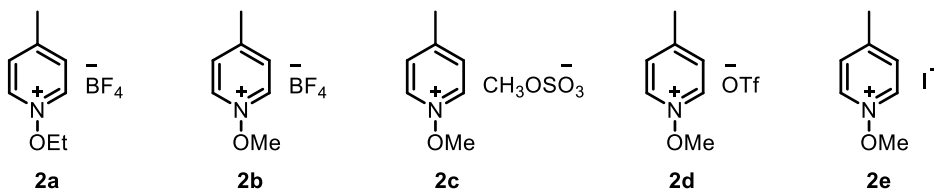

**Table S2<sup>a</sup>**

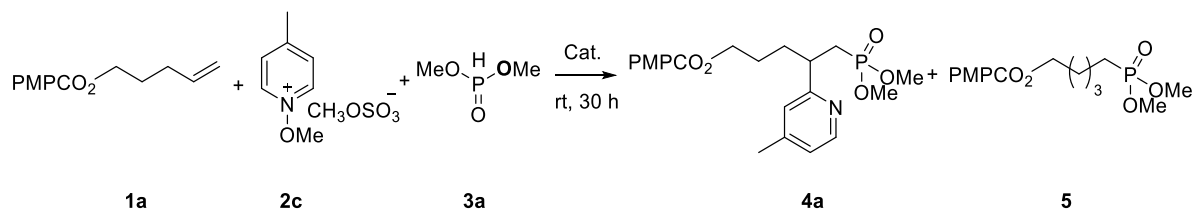

| entry | catalyst          | oxidant                                 | additive                        | solvent | yield (%) <sup>b</sup> |
|-------|-------------------|-----------------------------------------|---------------------------------|---------|------------------------|
| 1     | AgNO <sub>3</sub> | Mn(OAc) <sub>3</sub> ·2H <sub>2</sub> O | K <sub>2</sub> CO <sub>3</sub>  | MeCN    | 45 (74/26)             |
| 2     | AgNO <sub>3</sub> | Mn(OAc) <sub>3</sub> ·2H <sub>2</sub> O | NaOAc                           | MeCN    | 75 (78/22)             |
| 3     | AgNO <sub>3</sub> | Mn(OAc) <sub>3</sub> ·2H <sub>2</sub> O | Cs <sub>2</sub> CO <sub>3</sub> | MeCN    | 10 (75/25)             |
| 4     | AgNO <sub>3</sub> | Mn(OAc) <sub>3</sub> ·2H <sub>2</sub> O | <sup>t</sup> BuOK               | MeCN    | 12 (76/24)             |
| 5     | AgNO <sub>3</sub> | Mn(OAc) <sub>3</sub> ·2H <sub>2</sub> O | K <sub>2</sub> HPO <sub>4</sub> | MeCN    | 73 (79/21)             |

|    |                   |                                         |                   |      |            |
|----|-------------------|-----------------------------------------|-------------------|------|------------|
| 6  | AgNO <sub>3</sub> | Mn(OAc) <sub>3</sub> ·2H <sub>2</sub> O | DBU               | MeCN | 15 (77/23) |
| 7  | AgNO <sub>3</sub> | Mn(OAc) <sub>3</sub> ·2H <sub>2</sub> O | TMEDA             | MeCN | 25 (78/22) |
| 8  | AgNO <sub>3</sub> | Mn(OAc) <sub>3</sub> ·2H <sub>2</sub> O | Et <sub>3</sub> N | MeCN | trace      |
| 9  | AgNO <sub>3</sub> | Mn(OAc) <sub>3</sub> ·2H <sub>2</sub> O | DABCO             | MeCN | 12 (76/24) |
| 10 | AgNO <sub>3</sub> | Mn(OAc) <sub>3</sub> ·2H <sub>2</sub> O | 4A MS             | MeCN | 70 (79/21) |

<sup>a</sup>Reaction conditions: **1a** (0.2 mmol), **2c** (0.5 mmol), **3a** (0.4 mmol), additive (0.4 mmol), oxidant (0.3 mmol), catalyst (20 mmol %), solvent (1.0 mL), under nitrogen. <sup>b</sup>Yields were determined by <sup>1</sup>H NMR spectroscopy with caffeine as an internal standard.

### III. General experimental procedure

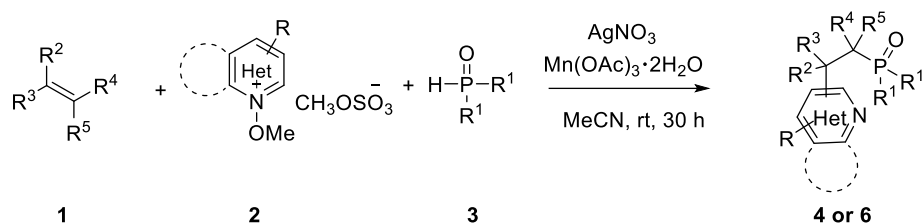

An oven-dried tube was charged with alkene **1** (0.2 mmol), N-methoxyheteroarene salts **2** (0.5 mmol), Mn(OAc)<sub>3</sub>·H<sub>2</sub>O (0.3 mmol), and AgNO<sub>3</sub> (0.04 mmol). The tube was evacuated and backfilled with nitrogen (repeated three times). Then, dialkyl phosphonate **3** (0.4 mmol), and acetonitrile (1.0 mL) was added into the reaction via syringe. The reaction mixture was stirring at room temperature for 30 h. The reaction mixture was extracted by ethyl acetate, the combined organic layers were washed with saturated brine, dried over Na<sub>2</sub>SO<sub>4</sub>, concentrated in vacuum and purified by flash column chromatography on silica gel (CH<sub>2</sub>Cl<sub>2</sub>/MeOH) to afford final the product **4** or **6**.

### IV. Control Experiments

#### The reaction without N-methoxyheteroarene salt

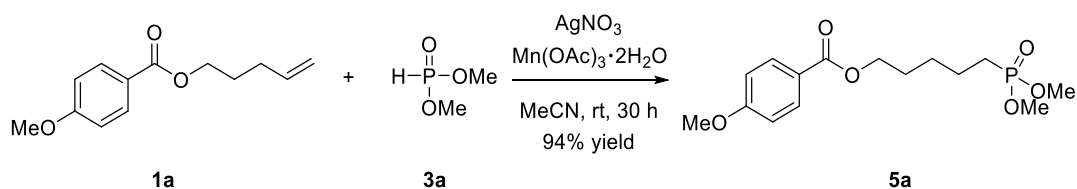

An oven-dried tube was charged with alkene **1a** (0.2 mmol), Mn(OAc)<sub>3</sub>·H<sub>2</sub>O (0.3 mmol), and AgNO<sub>3</sub> (0.04 mmol). The tube was evacuated and backfilled with nitrogen (repeated three times). Then, dimethyl phosphonate **3a** (0.4 mmol), and acetonitrile (1.0 mL) was added into the reaction via syringe. The reaction mixture was stirring at room temperature for 30 h. The reaction mixture was extracted by

ethyl acetate, the combined organic layers were washed with saturated brine, dried over Na<sub>2</sub>SO<sub>4</sub>, concentrated in vacuum and purified by flash column chromatography on silica gel (CH<sub>2</sub>Cl<sub>2</sub>/MeOH) to afford the product **5a** in 94% yield.

### The reaction without alkene

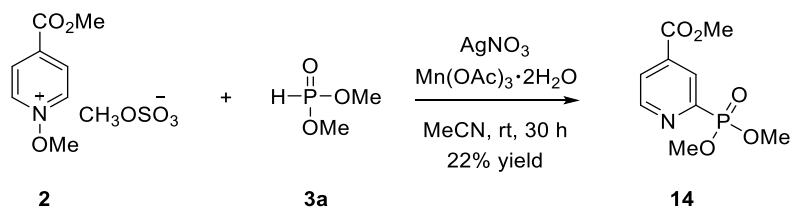

An oven-dried tube was charged with N-methoxyheteroarene salt **2** (0.2 mmol), Mn(OAc)<sub>3</sub>·H<sub>2</sub>O (0.3 mmol), and AgNO<sub>3</sub> (0.04 mmol). The tube was evacuated and backfilled with nitrogen (repeated three times). Then, dimethyl phosphonate **3a** (0.4 mmol), and acetonitrile (1.0 mL) was added into the reaction via syringe. The reaction mixture was stirring at room temperature for 30 h. The reaction mixture was extracted by ethyl acetate, the combined organic layers were washed with saturated brine, dried over Na<sub>2</sub>SO<sub>4</sub>, concentrated in vacuum and purified by flash column chromatography on silica gel (CH<sub>2</sub>Cl<sub>2</sub>/MeOH) to afford the product **14** in 22% yield.

### Pyridine **7** was used in the reaction

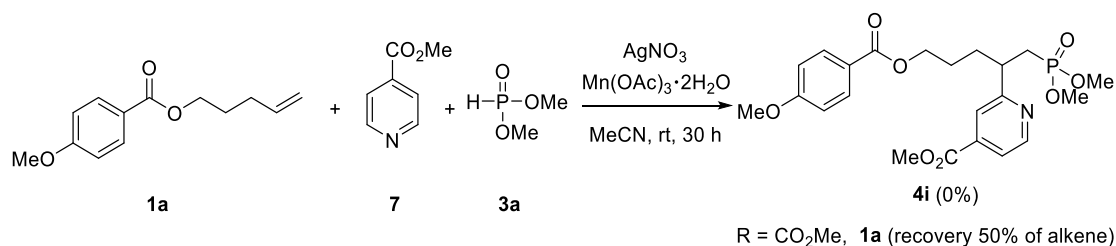

An oven-dried tube was charged with alkene **1a** (0.2 mmol), Mn(OAc)<sub>3</sub>·H<sub>2</sub>O (0.3 mmol), and AgNO<sub>3</sub> (0.04 mmol). The tube was evacuated and backfilled with nitrogen (repeated three times). Then, dimethyl phosphonate **3a** (0.4 mmol), pyridine **7** (0.5 mmol), and acetonitrile (1.0 mL) was added into the reaction via syringe. The reaction mixture was stirring at room temperature for 30 h. The reaction mixture was extracted by ethyl acetate, the combined organic layers were washed with saturated brine, dried over Na<sub>2</sub>SO<sub>4</sub>, concentrated in vacuum and purified by flash column chromatography on silica gel (CH<sub>2</sub>Cl<sub>2</sub>/MeOH).

Pyridine 1-oxide **8** was used in the reaction

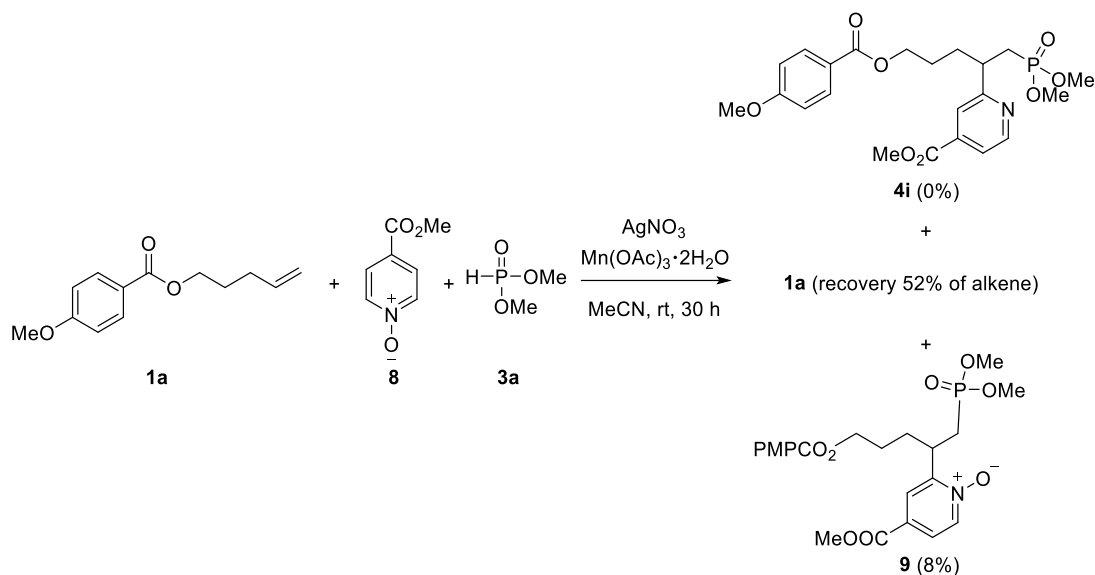

An oven-dried tube was charged with alkene **1a** (0.2 mmol), pyridine 1-oxide **8** (0.5 mmol),  $\text{Mn(OAc)}_3 \cdot \text{H}_2\text{O}$  (0.3 mmol), and  $\text{AgNO}_3$  (0.04 mmol). The tube was evacuated and backfilled with nitrogen (repeated three times). Then, dimethyl phosphonate **3a** (0.4 mmol), and acetonitrile (1.0 mL) was added into the reaction via syringe. The reaction mixture was stirring at room temperature for 30 h. The reaction mixture was extracted by ethyl acetate, the combined organic layers were washed with saturated brine, dried over  $\text{Na}_2\text{SO}_4$ , concentrated in vacuum and purified by flash column chromatography on silica gel ( $\text{CH}_2\text{Cl}_2/\text{MeOH}$ ) to afford the product **9** in 8% yield.

### TEMPO experiment

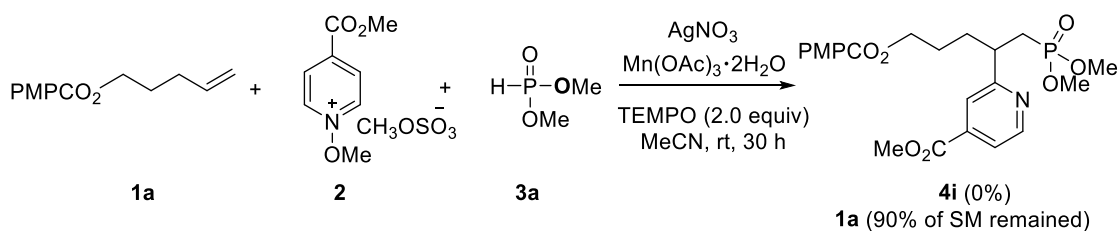

An oven-dried tube was charged with alkene **1a** (0.2 mmol), N-methoxy-N-(methylsulfonyl)pyridinium salt **2** (0.5 mmol), TEMPO (0.4 mmol),  $\text{Mn(OAc)}_3 \cdot \text{H}_2\text{O}$  (0.3 mmol), and  $\text{AgNO}_3$  (0.04 mmol). The tube was evacuated and backfilled with nitrogen (repeated three times). Then, dimethyl phosphonate **3a** (0.4 mmol), and acetonitrile (1.0 mL) was added into the reaction via syringe. The reaction mixture was stirring at room temperature for 30 h. The reaction mixture was extracted by ethyl acetate, the combined organic layers

were washed with saturated brine, dried over Na<sub>2</sub>SO<sub>4</sub>, concentrated in vacuum and purified by flash column chromatography on silica gel.

## V. Compound Characterizations

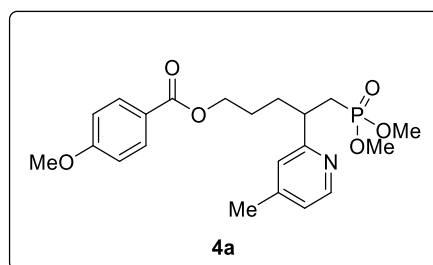

**5-(dimethoxyphosphoryl)-4-(4-methylpyridin-2-yl)pentyl 4-methoxybenzoate (4a).** Purified by flash column chromatography on silica gel (DCM : MeOH = 25 : 1). From 4-methoxyphenyl hex-5-enoate (44.0 mg, 0.2 mmol), compound **4a** (60.1 mg, 71%) (single isomer) was obtained. Colorless oil. <sup>1</sup>H NMR (400 MHz, Chloroform-*d*) δ 8.40 (d, *J* = 5.0 Hz, 1H), 7.94 (d, *J* = 9.0 Hz, 2H), 6.99 (s, 1H), 6.93 (d, *J* = 5.7 Hz, 1H), 6.88 (d, *J* = 9.0 Hz, 2H), 4.18 (t, *J* = 6.6 Hz, 2H), 3.83 (s, 3H), 3.55 (d, *J* = 10.8 Hz, 3H), 3.47 (d, *J* = 10.9 Hz, 3H), 3.15 – 3.12 (m, 1H), 2.44 – 2.38 (m, 1H), 2.30 (s, 3H), 2.11 – 2.05 (m, 1H), 1.92 – 1.88 (m, 2H), 1.65 – 1.60 (m, 1H), 1.49 – 1.45 (m, 1H). <sup>13</sup>C NMR (101 MHz, Chloroform-*d*) δ 166.2, 163.2, 162.1 (d, *J* = 7.4 Hz), 149.2, 147.4, 131.5, 124.4, 122.7, 122.7, 113.5, 64.3, 55.3, 52.0 (d, *J* = 6.7 Hz), 51.9 (d, *J* = 6.5 Hz), 41.3 (d, *J* = 3.3 Hz), 33.0 (d, *J* = 13.6 Hz), 30.1 (d, *J* = 138.9 Hz), 26.5, 20.9. <sup>31</sup>P NMR (162 MHz, Chloroform-*d*) δ 33.7. HRMS (ESI) Calcd for C<sub>21</sub>H<sub>28</sub>NO<sub>6</sub>P: [M] + Na<sup>+</sup> = 444.1546. Found: 444.1575.

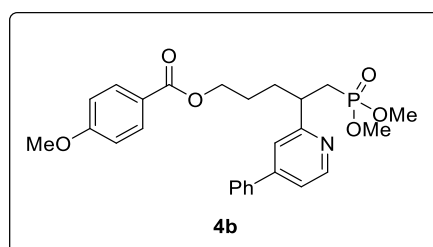

**5-(dimethoxyphosphoryl)-4-(4-phenylpyridin-2-yl)pentyl 4-methoxybenzoate (4b).** Purified by flash column chromatography on silica gel (DCM : MeOH = 25 : 1). From 4-methoxyphenyl hex-5-enoate (44.0 mg, 0.2 mmol), compound **4b** (66.9 mg, 70%) (single isomer) was obtained. Colorless oil. <sup>1</sup>H NMR (599 MHz, Chloroform-*d*) δ 8.62 (s, 1H), 7.95 (d, *J* = 8.8 Hz, 2H), 7.63 (d, *J* = 8.2 Hz, 2H),

7.47 (t,  $J = 7.7$  Hz, 2H), 7.43 (d,  $J = 9.9$  Hz, 2H), 7.36 (d,  $J = 5.1$  Hz, 1H), 6.87 (d,  $J = 8.8$  Hz, 2H), 4.22 (t,  $J = 6.5$  Hz, 2H), 3.83 (s, 3H), 3.57 (d,  $J = 10.8$  Hz, 3H), 3.49 (d,  $J = 10.9$  Hz, 3H), 3.30 – 3.28 (m, 1H), 2.49 – 2.46 (m, 1H), 2.18 – 2.17 (m, 1H), 2.01 – 1.98 (m, 2H), 1.69 – 1.67 (m, 1H), 1.56 – 1.54 (m, 1H).  $^{13}\text{C}$  NMR (151 MHz, Chloroform-*d*)  $\delta$  166.2, 163.2, 163.0 (d,  $J = 7.1$  Hz), 149.9, 148.7, 138.0, 131.5, 129.0, 129.0, 127.0, 122.7, 121.4, 119.7, 113.5, 64.2, 55.3, 52.0 (d,  $J = 6.6$  Hz), 52.0 (d,  $J = 6.5$  Hz), 41.6 (d,  $J = 3.4$  Hz), 33.1 (d,  $J = 13.7$  Hz), 30.3 (d,  $J = 139.3$  Hz), 26.5.  $^{31}\text{P}$  NMR (243 MHz, Chloroform-*d*)  $\delta$  33.0. HRMS (ESI) Calcd for  $\text{C}_{26}\text{H}_{30}\text{NO}_6\text{P}$ :  $[\text{M}] + \text{Na}^+ = 506.1703$ . Found: 506.1779.

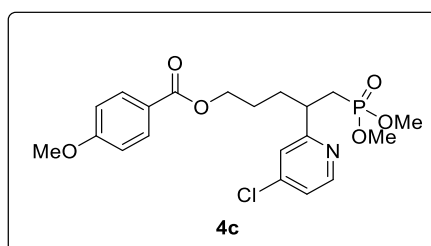

**4-(4-chloropyridin-2-yl)-5-(dimethoxyphosphoryl)pentyl 4-methoxybenzoate (4c).** Purified by flash column chromatography on silica gel (DCM : MeOH = 25 : 1). From 4-methoxyphenyl hex-5-enoate (44.0 mg, 0.2 mmol), compound **4c** (56.5 mg, 64%) (single isomer) was obtained. Colorless oil.  $^1\text{H}$  NMR (599 MHz, Chloroform-*d*)  $\delta$  8.46 (d,  $J = 5.3$  Hz, 1H), 7.95 (d,  $J = 8.9$  Hz, 2H), 7.20 (d,  $J = 1.9$  Hz, 1H), 7.15 (dd,  $J = 5.3, 2.0$  Hz, 1H), 6.89 (d,  $J = 8.9$  Hz, 2H), 4.20 (t,  $J = 6.5$  Hz, 2H), 3.84 (s, 3H), 3.56 (d,  $J = 10.9$  Hz, 3H), 3.52 (d,  $J = 10.8$  Hz, 3H), 3.17 – 3.15 (m, 1H), 2.41 – 2.39 (m, 1H), 2.11 – 2.10 (m, 1H), 1.92 – 1.91 (m, 2H), 1.65 – 1.63 (m, 1H), 1.50 – 1.48 (m, 1H).  $^{13}\text{C}$  NMR (151 MHz, Chloroform-*d*)  $\delta$  166.2, 164.3 (d,  $J = 7.0$  Hz), 163.3, 150.4, 144.1, 131.5, 123.7, 122.6, 122.1, 113.5, 64.1, 55.4, 52.0 (d,  $J = 2.7$  Hz), 52.0 (d,  $J = 2.7$  Hz), 41.5 (d,  $J = 3.5$  Hz), 33.0 (d,  $J = 13.8$  Hz), 30.0 (d,  $J = 139.9$  Hz), 26.4.  $^{31}\text{P}$  NMR (243 MHz, Chloroform-*d*)  $\delta$  32.3. HRMS (ESI) Calcd for  $\text{C}_{20}\text{H}_{25}\text{ClNO}_6\text{P}$ :  $[\text{M}] + \text{Na}^+ = 464.1000$ . Found: 464.1016.

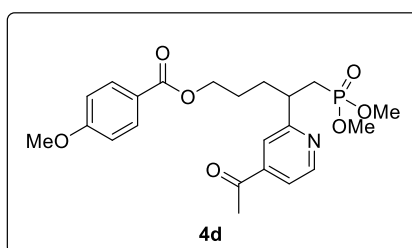

**4-(4-acetylpyridin-2-yl)-5-(dimethoxyphosphoryl)pentyl 4-methoxybenzoate (4d).** Purified by flash column chromatography on silica gel (DCM : MeOH = 25 : 1). From 4-methoxyphenyl hex-5-



enoate (44.0 mg, 0.2 mmol), compound **4d** (58.4 mg, 65%) (single isomer) was obtained. Colorless oil.  $^1\text{H}$  NMR (599 MHz, Chloroform-*d*)  $\delta$  8.75 (d,  $J = 5.0$  Hz, 1H), 7.94 (d,  $J = 8.8$  Hz, 2H), 7.60 (s, 1H), 7.57 (d,  $J = 4.9$  Hz, 1H), 6.89 (d,  $J = 8.9$  Hz, 2H), 4.24 – 4.18 (m, 2H), 3.84 (s, 3H), 3.56 (d,  $J = 10.8$  Hz, 3H), 3.51 (d,  $J = 10.9$  Hz, 3H), 3.31 – 3.30 (m, 1H), 2.61 (s, 3H), 2.45 – 2.43 (m, 1H), 2.16 – 2.14 (m, 1H), 1.96 – 1.94 (m, 2H), 1.67 – 1.64 (m, 1H), 1.48 – 1.46 (m, 1H).  $^{13}\text{C}$  NMR (151 MHz, Chloroform-*d*)  $\delta$  197.4, 166.2, 164.2 (d,  $J = 7.0$  Hz), 163.3, 150.7, 143.1, 131.5, 122.6, 121.0, 119.4, 113.5, 64.1, 55.4, 52.1 (d,  $J = 3.8$  Hz), 52.0 (d,  $J = 4.4$  Hz), 41.7 (d,  $J = 3.4$  Hz), 33.1 (d,  $J = 13.8$  Hz), 30.1 (d,  $J = 139.8$  Hz), 26.7, 26.5.  $^{31}\text{P}$  NMR (243 MHz, Chloroform-*d*)  $\delta$  32.4. HRMS (ESI) Calcd for  $\text{C}_{22}\text{H}_{28}\text{NO}_7\text{P}$ :  $[\text{M}] + \text{Na}^+ = 472.1496$ . Found: 472.1506.

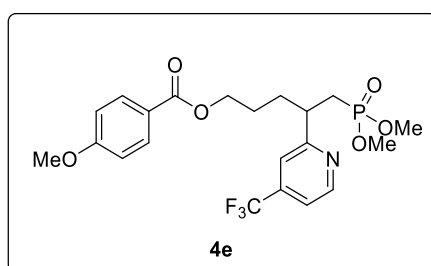

**5-(dimethoxyphosphoryl)-4-(4-(trifluoromethyl)pyridin-2-yl)pentyl 4-methoxybenzoate (4e).**

Purified by flash column chromatography on silica gel (DCM : MeOH = 25 : 1). From 4-methoxyphenyl hex-5-enoate (44.0 mg, 0.2 mmol), compound **4e** (78.8 mg, 83%) (single isomer) was obtained. Colorless oil.  $^1\text{H}$  NMR (400 MHz, Chloroform-*d*)  $\delta$  8.76 (d,  $J = 5.0$  Hz, 1H), 7.95 (d,  $J = 8.9$  Hz, 2H), 7.40 (s, 1H), 7.37 (d,  $J = 5.0$  Hz, 1H), 6.90 (d,  $J = 8.9$  Hz, 2H), 4.22 (t,  $J = 6.5$  Hz, 2H), 3.85 (s, 3H), 3.56 (d,  $J = 10.8$  Hz, 3H), 3.52 (d,  $J = 10.9$  Hz, 3H), 3.31 – 3.29 (m, 1H), 2.44 – 2.40 (m, 1H), 2.16 – 2.14 (m, 1H), 1.97 – 1.95 (m, 2H), 1.69 – 1.66 (m, 1H), 1.50 – 1.48 (m, 1H).  $^{13}\text{C}$  NMR (101 MHz, Chloroform-*d*)  $\delta$  166.2, 164.3, 163.3, 150.5, 138.5 (q,  $J = 34.0$  Hz), 131.5, 122.8 (q,  $J = 272.0$  Hz), 122.6, 119.1 (q,  $J = 30.0$  Hz), 117.4 (q,  $J = 30.0$  Hz), 113.5, 64.1, 55.4, 52.1 (d,  $J = 6.6$  Hz), 52.0 (d,  $J = 6.7$  Hz), 41.8 (d,  $J = 3.6$  Hz), 33.1 (d,  $J = 14.3$  Hz), 30.2 (d,  $J = 140.3$  Hz), 26.4.  $^{31}\text{P}$  NMR (162 MHz, Chloroform-*d*)  $\delta$  32.9.  $^{19}\text{F}$  NMR (376 MHz, Chloroform-*d*)  $\delta$  -64.7. HRMS (ESI) Calcd for  $\text{C}_{21}\text{H}_{25}\text{F}_3\text{NO}_6\text{P}$ :  $[\text{M}] + \text{Na}^+ = 498.1264$ . Found: 498.1260.

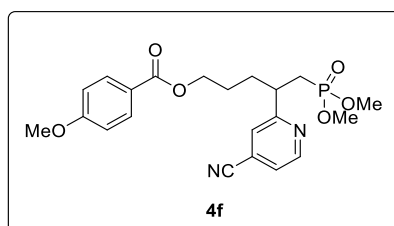

**4-(4-cyanopyridin-2-yl)-5-(dimethoxyphosphoryl)pentyl 4-methoxybenzoate (4f).** Purified by flash column chromatography on silica gel (DCM : MeOH = 25 : 1). From 4-methoxyphenyl hex-5-enoate (44.0 mg, 0.2 mmol), compound **4f** (68.2 mg, 80%) (single isomer) was obtained. Colorless oil.  $^1\text{H}$  NMR (599 MHz, Chloroform-*d*)  $\delta$  8.74 (d,  $J = 4.9$  Hz, 1H), 7.94 (d,  $J = 8.8$  Hz, 2H), 7.41 (s, 1H), 7.38 (d,  $J = 4.9$  Hz, 1H), 6.90 (d,  $J = 8.7$  Hz, 2H), 4.21 – 4.20 (m, 2H), 3.85 (s, 3H), 3.55 (dd,  $J = 16.1, 10.9$  Hz, 6H), 3.27 – 3.24 (m, 1H), 2.42 – 2.40 (m, 1H), 2.15 – 2.10 (m, 1H), 1.94 – 1.91 (m, 2H), 1.67 – 1.64 (m, 1H), 1.47 – 1.45 (m, 1H).  $^{13}\text{C}$  NMR (151 MHz, Chloroform-*d*)  $\delta$  166.1, 164.3 (d,  $J = 6.3$  Hz), 163.3, 150.5, 131.5, 125.0, 123.2, 122.5, 120.5, 116.4, 113.6, 63.9, 55.4, 52.2 (d,  $J = 6.6$  Hz), 52.1 (d,  $J = 6.6$  Hz), 41.7 (d,  $J = 3.6$  Hz), 33.0 (d,  $J = 14.5$  Hz), 29.9 (d,  $J = 140.4$  Hz), 26.4.  $^{31}\text{P}$  NMR (243 MHz, Chloroform-*d*)  $\delta$  31.9. HRMS (ESI) Calcd for  $\text{C}_{21}\text{H}_{25}\text{N}_2\text{O}_6\text{P}$ :  $[\text{M}] + \text{Na}^+ = 455.1342$ . Found: 455.1367.

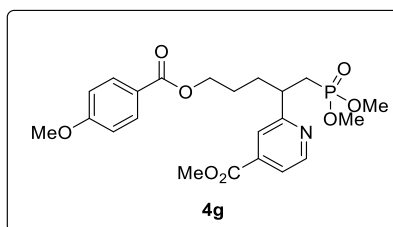

**methyl 2-(1-(dimethoxyphosphoryl)-5-((4-methoxybenzoyl)oxy)pentan-2-yl) isonicotinate (4g).** Purified by flash column chromatography on silica gel (DCM : MeOH = 25 : 1). From 4-methoxyphenyl hex-5-enoate (44.0 mg, 0.2 mmol), compound **4g** (74.2 mg, 80%) (single isomer) was obtained. Colorless oil.  $^1\text{H}$  NMR (400 MHz, Chloroform-*d*)  $\delta$  8.69 (dd,  $J = 5.0, 0.9$  Hz, 1H), 7.92 (d,  $J = 9.0$  Hz, 2H), 7.71 (dd,  $J = 1.6, 0.9$  Hz, 1H), 7.67 (dd,  $J = 5.0, 1.6$  Hz, 1H), 6.87 (d,  $J = 8.9$  Hz, 2H), 4.17 (t,  $J = 6.5$  Hz, 2H), 3.91 (s, 3H), 3.81 (s, 3H), 3.53 (d,  $J = 10.8$  Hz, 3H), 3.49 (d,  $J = 10.9$  Hz, 3H), 3.29 – 3.26 (m, 1H), 2.44 – 2.39 (m, 1H), 2.13 – 2.11 (m, 1H), 1.94 – 1.90 (m, 2H), 1.69 – 1.58 (m, 1H), 1.46 – 1.42 (m, 1H).  $^{13}\text{C}$  NMR (101 MHz, Chloroform-*d*)  $\delta$  166.1, 165.5, 163.7 (d,  $J = 7.0$  Hz), 163.2, 150.3, 137.5, 131.4, 122.5, 122.4, 120.9, 113.4, 64.1, 55.3, 52.6, 52.0 (d,  $J = 2.6$  Hz), 52.0 (d,  $J = 2.6$  Hz), 41.6 (d,  $J = 3.5$  Hz), 33.1 (d,  $J = 14.0$  Hz), 30.0 (d,  $J = 139.8$  Hz), 26.4.  $^{31}\text{P}$  NMR (162 MHz, Chloroform-*d*)  $\delta$  33.1. HRMS (ESI) Calcd for  $\text{C}_{22}\text{H}_{28}\text{NO}_8\text{P}$ :  $[\text{M}] + \text{Na}^+ = 488.1445$ . Found: 488.1443.

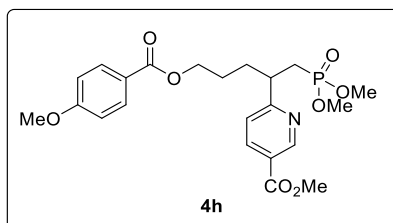

**methyl 6-(1-(dimethoxyphosphoryl)-5-((4-methoxybenzoyl)oxy)pentan-2-yl)nicotinate (4h).**

Purified by flash column chromatography on silica gel (DCM : MeOH = 25 : 1). From 4-methoxyphenyl hex-5-enoate (44.0 mg, 0.2 mmol), compound **4h** (47.8 mg, 52%) (major) was obtained. Colorless oil.  $^1\text{H}$  NMR (599 MHz, Chloroform-*d*)  $\delta$  9.16 (d,  $J$  = 1.9 Hz, 1H), 8.20 (dd,  $J$  = 8.1, 2.2 Hz, 1H), 7.93 (d,  $J$  = 8.8 Hz, 2H), 7.26 (d,  $J$  = 8.1 Hz, 1H), 6.89 (d,  $J$  = 8.9 Hz, 2H), 4.20 – 4.17 (m, 2H), 3.93 (s, 3H), 3.84 (s, 3H), 3.55 (d,  $J$  = 10.8 Hz, 3H), 3.49 (d,  $J$  = 10.9 Hz, 3H), 3.28 – 3.26 (m, 1H), 2.47 – 2.44 (m, 1H), 2.15 – 2.11 (m, 1H), 1.94 – 1.92 (m, 2H), 1.63 – 1.62 (m, 1H), 1.46 – 1.45 (m, 1H).  $^{13}\text{C}$  NMR (151 MHz, Chloroform-*d*)  $\delta$  167.1 (d,  $J$  = 6.4 Hz), 166.2, 165.7, 163.3, 150.8, 137.3, 131.5, 124.2, 123.2, 122.7, 113.5, 64.1, 55.4, 52.3, 52.1 (d,  $J$  = 6.0 Hz), 52.0 (d,  $J$  = 6.4 Hz), 41.7 (d,  $J$  = 3.5 Hz), 33.1 (d,  $J$  = 14.0 Hz), 30.0 (d,  $J$  = 140.0 Hz), 26.5.  $^{31}\text{P}$  NMR (243 MHz, Chloroform-*d*)  $\delta$  32.3. HRMS (ESI) Calcd for  $\text{C}_{22}\text{H}_{28}\text{NO}_8\text{P}$ :  $[\text{M}] + \text{Na}^+ = 488.1445$ . Found: 488.1455.

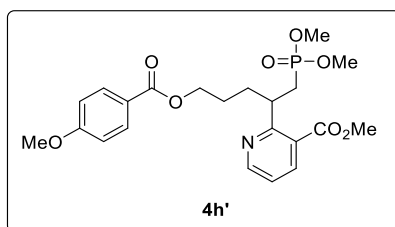

**methyl 2-(1-(dimethoxyphosphoryl)-5-((4-methoxybenzoyl)oxy)pentan-2-yl)nicotinate (4h').**

Purified by flash column chromatography on silica gel (DCM : MeOH = 25 : 1). From 4-methoxyphenyl hex-5-enoate (44.0 mg, 0.2 mmol), compound **4h'** (20.4 mg, 22%) (minor) was obtained. Colorless oil.  $^1\text{H}$  NMR (599 MHz, Chloroform-*d*)  $\delta$  8.70 (dd,  $J$  = 4.7, 1.8 Hz, 1H), 8.12 (dd,  $J$  = 7.9, 1.8 Hz, 1H), 7.97 (d,  $J$  = 8.9 Hz, 2H), 7.22 (dd,  $J$  = 7.9, 4.7 Hz, 1H), 6.91 (d,  $J$  = 8.9 Hz, 2H), 4.29 – 4.27 (m, 1H), 4.22 (t,  $J$  = 6.6 Hz, 2H), 3.94 (s, 3H), 3.86 (s, 3H), 3.55 (d,  $J$  = 10.8 Hz, 3H), 3.50 (d,  $J$  = 10.7 Hz, 3H), 2.55 – 2.52 (m, 1H), 2.13 – 2.09 (m, 2H), 1.93 – 1.91 (m, 1H), 1.78 – 1.77 (m, 1H), 1.53 – 1.51 (m, 1H).  $^{13}\text{C}$  NMR (151 MHz, Chloroform-*d*)  $\delta$  167.1, 166.3, 163.3 (d,  $J$  = 6.0 Hz), 163.2, 151.9, 138.0, 131.6, 126.7, 122.9, 121.0, 113.5, 64.5, 55.4, 52.5, 52.1 (d,  $J$  = 6.4 Hz), 52.0 (d,  $J$  = 6.9 Hz), 36.6 (d,  $J$  = 3.0 Hz), 33.3 (d,  $J$  = 15.0 Hz), 30.1 (d,  $J$  = 139.3 Hz), 26.4.  $^{31}\text{P}$  NMR (243 MHz, Chloroform-*d*)  $\delta$  33.0. HRMS (ESI) Calcd for  $\text{C}_{22}\text{H}_{28}\text{NO}_8\text{P}$ :  $[\text{M}] + \text{Na}^+ = 488.1445$ . Found: 488.1455.

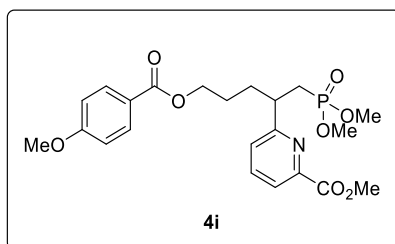

**methyl 6-(1-(dimethoxyphosphoryl)-5-((4-methoxybenzoyl)oxy)pentan-2-yl) picolinate (4i).**

Purified by flash column chromatography on silica gel (DCM : MeOH = 25 : 1). From 4-methoxyphenyl hex-5-enoate (44.0 mg, 0.2 mmol), compound **4i** (28.3 mg, 30%) (minor) was obtained. Colorless oil.  $^1\text{H}$  NMR (599 MHz, Chloroform-*d*)  $\delta$  7.95 (dd,  $J = 8.1, 4.2$  Hz, 3H), 7.75 (t,  $J = 7.7$  Hz, 1H), 7.37 (d,  $J = 7.7$  Hz, 1H), 6.90 (d,  $J = 8.6$  Hz, 2H), 4.21 – 4.20 (m, 2H), 3.97 (s, 3H), 3.86 (s, 3H), 3.56 (d,  $J = 10.8$  Hz, 3H), 3.52 (d,  $J = 10.8$  Hz, 3H), 3.33 – 3.31 (m, 1H), 2.56 – 2.54 (m, 1H), 2.17 – 2.16 (m, 1H), 1.99 – 1.96 (m, 2H), 1.68 – 1.66 (m, 1H), 1.52 – 1.49 (m, 1H).  $^{13}\text{C}$  NMR (151 MHz, Chloroform-*d*)  $\delta$  166.2, 165.8, 163.3, 163.1 (d,  $J = 7.0$  Hz), 148.0, 137.0, 131.5, 126.5, 123.3, 122.7, 113.5, 64.2, 55.4, 52.6, 52.1, 52.0, 41.6 (d,  $J = 3.5$  Hz), 33.1 (d,  $J = 13.8$  Hz), 29.8 (d,  $J = 139.3$  Hz), 26.5.  $^{31}\text{P}$  NMR (243 MHz, Chloroform-*d*)  $\delta$  32.7. HRMS (ESI) Calcd for  $\text{C}_{22}\text{H}_{28}\text{NO}_8\text{P}$ :  $[\text{M}] + \text{Na}^+ = 488.1445$ . Found: 488.1447.

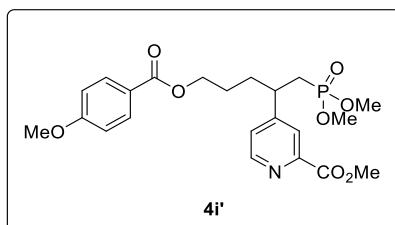

**methyl 4-(1-(dimethoxyphosphoryl)-5-((4-methoxybenzoyl)oxy)pentan-2-yl)picolinate (4i').**

Purified by flash column chromatography on silica gel (DCM : MeOH = 25 : 1). From 4-methoxyphenyl hex-5-enoate (44.0 mg, 0.2 mmol), compound **4i'** (44.8 mg, 48%) (major) was obtained. Colorless oil.  $^1\text{H}$  NMR (599 MHz, Chloroform-*d*)  $\delta$  8.67 (d,  $J = 4.9$  Hz, 1H), 8.01 (s, 1H), 7.94 (d,  $J = 8.5$  Hz, 2H), 7.35 (d,  $J = 3.4$  Hz, 1H), 6.90 (d,  $J = 8.6$  Hz, 2H), 4.21 (t,  $J = 6.4$  Hz, 2H), 4.00 (s, 3H), 3.85 (s, 3H), 3.59 (d,  $J = 10.9$  Hz, 3H), 3.51 (d,  $J = 10.9$  Hz, 3H), 3.16 – 3.15 (m, 1H), 2.18 – 2.10 (m, 2H), 2.02 – 2.00 (m, 1H), 1.82 – 1.79 (m, 1H), 1.64 – 1.62 (m, 1H), 1.50 – 1.48 (m, 1H).  $^{13}\text{C}$  NMR (151 MHz, Chloroform-*d*)  $\delta$  166.1, 165.6, 163.3, 154.4 (d,  $J = 8.1$  Hz), 150.0, 148.3, 131.5, 126.4, 123.9, 122.5, 113.6, 63.8, 55.4, 52.9, 52.2, 52.1, 39.6 (d,  $J = 3.7$  Hz), 33.4 (d,  $J = 12.4$  Hz), 31.5 (d,  $J = 141.3$  Hz), 26.5.  $^{31}\text{P}$  NMR (243 MHz, Chloroform-*d*)  $\delta$  30.8. HRMS (ESI) Calcd for  $\text{C}_{22}\text{H}_{28}\text{NO}_8\text{P}$ :  $[\text{M}] + \text{Na}^+ = 488.1445$ . Found: 488.1457.

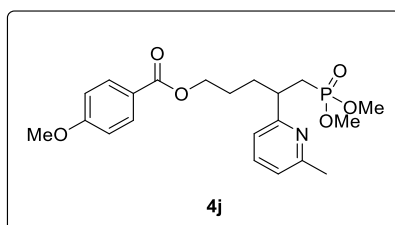

**5-(dimethoxyphosphoryl)-4-(6-methylpyridin-2-yl)pentyl 4-methoxybenzoate (4j).** Purified by flash column chromatography on silica gel (DCM : MeOH = 25 : 1). From 4-methoxyphenyl hex-5-enoate (44.0 mg, 0.2 mmol), compound **4j** (38.7 mg, 46%) (major) was obtained. Colorless oil. <sup>1</sup>H NMR (400 MHz, Chloroform-*d*) δ 7.96 (d, *J* = 8.9 Hz, 2H), 7.51 (t, *J* = 7.6 Hz, 1H), 7.00 (d, *J* = 8.0 Hz, 2H), 6.90 (d, *J* = 8.9 Hz, 2H), 4.21 (t, *J* = 6.6 Hz, 2H), 3.86 (s, 3H), 3.56 (d, *J* = 10.8 Hz, 3H), 3.52 (d, *J* = 10.8 Hz, 3H), 3.20 (s, 1H), 2.54 – 2.45 (m, 4H), 2.18 – 2.09 (m, 1H), 1.96 – 1.90 (m, 2H), 1.69 – 1.63 (m, 1H), 1.54 – 1.50 (m, 1H). <sup>13</sup>C NMR (151 MHz, Chloroform-*d*) δ 166.2, 163.2, 161.7 (d, *J* = 7.5 Hz), 158.1, 136.4, 131.5, 122.8, 121.2, 120.2, 113.5, 64.3, 55.4, 52.0 (d, *J* = 6.5 Hz), 51.9 (d, *J* = 6.4 Hz), 41.4 (d, *J* = 3.4 Hz), 33.0 (d, *J* = 13.5 Hz), 30.1 (d, *J* = 138.7 Hz), 26.5, 24.5. <sup>31</sup>P NMR (162 MHz, Chloroform-*d*) δ 33.8. HRMS (ESI) Calcd for C<sub>21</sub>H<sub>28</sub>NO<sub>6</sub>P: [M] + Na<sup>+</sup> = 444.1546. Found: 444.1559.

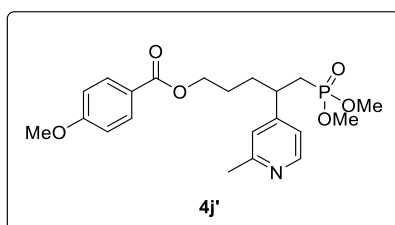

**5-(dimethoxyphosphoryl)-4-(2-methylpyridin-4-yl)pentyl 4-methoxybenzoate (4j').** Purified by flash column chromatography on silica gel (DCM : MeOH = 25 : 1). From 4-methoxyphenyl hex-5-enoate (44.0 mg, 0.2 mmol), compound **4j'** (19.7 mg, 23%) (minor) was obtained. Colorless oil. <sup>1</sup>H NMR (400 MHz, Chloroform-*d*) δ 8.41 (d, *J* = 5.1 Hz, 1H), 7.94 (d, *J* = 9.0 Hz, 2H), 7.00 (s, 1H), 6.94 (d, *J* = 5.2 Hz, 1H), 6.89 (d, *J* = 9.0 Hz, 2H), 4.20 (t, *J* = 6.4 Hz, 2H), 3.84 (s, 3H), 3.59 (d, *J* = 10.9 Hz, 3H), 3.49 (d, *J* = 10.9 Hz, 3H), 3.01 – 2.99 (m, 1H), 2.52 (s, 3H), 2.10 – 2.06 (m, 2H), 1.97 – 1.93 (m, 1H), 1.76 – 1.72 (m, 1H), 1.61 – 1.57 (m, 1H), 1.54 – 1.50 (m, 1H). <sup>13</sup>C NMR (101 MHz, Chloroform-*d*) δ 166.2, 163.3, 158.6, 153.1 (d, *J* = 8.7 Hz), 149.2, 131.5, 122.5, 122.4, 119.8, 113.5, 63.9, 55.4, 52.1 (d, *J* = 6.8 Hz), 52.0 (d, *J* = 6.6 Hz), 39.3 (d, *J* = 3.4 Hz), 33.2 (d, *J* = 12.0 Hz), 31.6 (d, *J* = 140.6 Hz), 26.5, 24.3. <sup>31</sup>P NMR (162 MHz, Chloroform-*d*) δ 32.2. HRMS (ESI) Calcd for C<sub>21</sub>H<sub>28</sub>NO<sub>6</sub>P: [M] + Na<sup>+</sup> = 444.1546. Found: 444.1548.

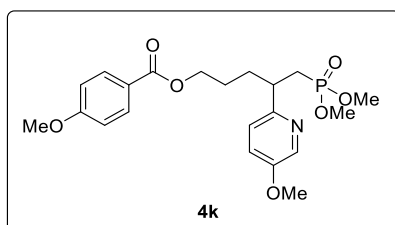

**5-(dimethoxyphosphoryl)-4-(5-methoxypyridin-2-yl)pentyl 4-methoxybenzoate (4k).** Purified by flash column chromatography on silica gel (DCM : MeOH = 25 : 1). From 4-methoxyphenyl hex-5-enoate (44.0 mg, 0.2 mmol), compound **4k** (45.1 mg, 52%) (single isomer) was obtained. Colorless oil.  $^1\text{H}$  NMR (400 MHz, Chloroform-*d*)  $\delta$  8.18 (dd,  $J = 3.9, 2.2$  Hz, 1H), 7.97 (d,  $J = 9.1$  Hz, 2H), 7.15 – 7.14 (m, 2H), 6.91 (d,  $J = 9.0$  Hz, 2H), 4.22 (t,  $J = 6.6$  Hz, 2H), 3.87 (s, 3H), 3.85 – 3.81 (m, 4H), 3.58 (d,  $J = 2.2$  Hz, 3H), 3.56 (d,  $J = 2.2$  Hz, 3H), 2.56 – 2.52 (m, 1H), 2.15 – 2.13 (m, 1H), 1.94 – 1.92 (m, 2H), 1.69 – 1.65 (m, 1H), 1.56 – 1.53 (m, 1H).  $^{13}\text{C}$  NMR (101 MHz, Chloroform-*d*)  $\delta$  166.3, 163.2, 153.5, 152.4 (d,  $J = 7.6$  Hz), 140.6, 131.5, 122.9, 122.2, 117.3, 113.5, 64.5, 55.5, 55.4, 52.1, 52.0, 33.2 (d,  $J = 2.9$  Hz), 32.2 (d,  $J = 13.1$  Hz), 28.9 (d,  $J = 138.9$  Hz), 26.2.  $^{31}\text{P}$  NMR (162 MHz, Chloroform-*d*)  $\delta$  34.3. HRMS (ESI) Calcd for  $\text{C}_{21}\text{H}_{28}\text{NO}_7\text{P}$ :  $[\text{M}] + \text{Na}^+ = 460.1496$ . Found: 460.1514.

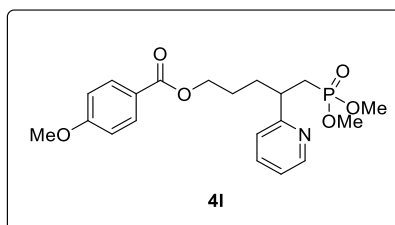

**5-(dimethoxyphosphoryl)-4-(pyridin-2-yl)pentyl 4-methoxybenzoate (4l).** Purified by flash column chromatography on silica gel (DCM : MeOH = 25 : 1). From 4-methoxyphenyl hex-5-enoate (44.0 mg, 0.2 mmol), compound **4l** (39.3 mg, 49%) (major) was obtained. Colorless oil.  $^1\text{H}$  NMR (599 MHz, Chloroform-*d*)  $\delta$  8.57 (d,  $J = 4.8$  Hz, 1H), 7.95 (d,  $J = 8.5$  Hz, 2H), 7.60 (t,  $J = 7.7$  Hz, 1H), 7.18 (d,  $J = 7.8$  Hz, 1H), 7.14 – 7.12 (m, 1H), 6.89 (d,  $J = 8.4$  Hz, 2H), 4.19 (t,  $J = 6.6$  Hz, 2H), 3.84 (s, 3H), 3.55 (d,  $J = 10.8$  Hz, 3H), 3.48 (d,  $J = 10.8$  Hz, 3H), 3.21 – 3.18 (m, 4.9 Hz, 1H), 2.46 – 2.41 (m, 1H), 2.16 – 2.09 (m, 1H), 1.94 – 1.92 (m, 2H), 1.66 – 1.63 (m, 1H), 1.49 – 1.46 (m, 1H).  $^{13}\text{C}$  NMR (151 MHz, Chloroform-*d*)  $\delta$  166.2, 163.3, 162.4 (d,  $J = 7.0$  Hz), 149.6, 136.3, 131.5, 123.6, 122.7, 121.8, 113.5, 64.3, 55.4, 52.0 (d,  $J = 4.9$  Hz), 52.0 (d,  $J = 4.7$  Hz), 41.5 (d,  $J = 3.4$  Hz), 33.2 (d,  $J = 14.0$  Hz), 30.2 (d,  $J = 139.3$  Hz), 26.5.  $^{31}\text{P}$  NMR (243 MHz, Chloroform-*d*)  $\delta$  32.9. HRMS (ESI) Calcd for  $\text{C}_{20}\text{H}_{26}\text{NO}_6\text{P}$ :  $[\text{M}] + \text{Na}^+ = 430.1390$ . Found: 430.1393.

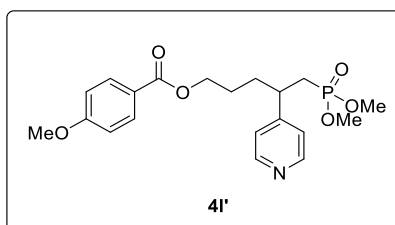

**5-(dimethoxyphosphoryl)-4-(pyridin-4-yl)pentyl 4-methoxybenzoate (4l')**. Purified by flash column chromatography on silica gel (DCM : MeOH = 25 : 1). From 4-methoxyphenyl hex-5-enoate (44.0 mg, 0.2 mmol), compound **4l'** (17.1 mg, 21%) (minor) was obtained. Colorless oil.  $^1\text{H}$  NMR (400 MHz, Chloroform-*d*)  $\delta$  8.55 (d,  $J = 6.1$  Hz, 2H), 7.95 (d,  $J = 9.0$  Hz, 2H), 7.16 (d,  $J = 6.1$  Hz, 2H), 6.91 (d,  $J = 9.0$  Hz, 2H), 4.22 (t,  $J = 6.4$  Hz, 2H), 3.86 (s, 3H), 3.59 (d,  $J = 10.9$  Hz, 3H), 3.50 (d,  $J = 10.8$  Hz, 3H), 3.06 – 3.04 (m, 1H), 2.16 – 2.09 (m, 2H), 1.99 – 1.96 (m, 1H), 1.79 – 1.76 (m, 1H), 1.66 – 1.62 (m, 1H), 1.55 – 1.51 (m, 1H).  $^{13}\text{C}$  NMR (101 MHz, Chloroform-*d*)  $\delta$  166.2, 163.3, 152.7 (d,  $J = 8.5$  Hz), 150.1, 131.5, 122.8, 122.6, 113.6, 63.9, 55.4, 52.2 (d,  $J = 6.7$  Hz), 52.1 (d,  $J = 6.6$  Hz), 39.5 (d,  $J = 3.5$  Hz), 33.4 (d,  $J = 12.5$  Hz), 31.7 (d,  $J = 140.9$  Hz), 26.5.  $^{31}\text{P}$  NMR (162 MHz, Chloroform-*d*)  $\delta$  32.0. HRMS (ESI) Calcd for  $\text{C}_{20}\text{H}_{26}\text{NO}_6\text{P}$ :  $[\text{M}] + \text{H}^+ = 408.1571$ . Found: 408.1589.

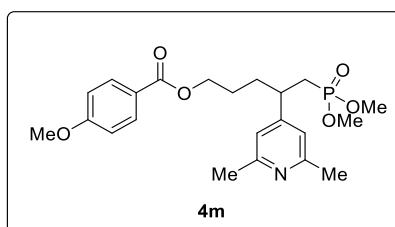

**5-(dimethoxyphosphoryl)-4-(2,6-dimethylpyridin-4-yl)pentyl 4-methoxybenzoate (4m)**. Purified by flash column chromatography on silica gel (DCM : MeOH = 25 : 1). From 4-methoxyphenyl hex-5-enoate (44.0 mg, 0.2 mmol), compound **4m** (53.1 mg, 61%) (single isomer) was obtained. Colorless oil.  $^1\text{H}$  NMR (599 MHz, Chloroform-*d*)  $\delta$  7.95 (d,  $J = 8.8$  Hz, 2H), 6.91 (d,  $J = 8.9$  Hz, 2H), 6.81 (s, 2H), 4.21 (t,  $J = 6.5$  Hz, 2H), 3.85 (s, 3H), 3.60 (d,  $J = 10.9$  Hz, 3H), 3.51 (d,  $J = 10.9$  Hz, 3H), 2.97 – 2.95 (m, 1H), 2.50 (s, 6H), 2.09 – 2.06 (m, 2H), 1.97 – 1.95 (m, 1H), 1.74 – 1.72 (m, 1H), 1.63 – 1.60 (m, 1H), 1.53 – 1.51 (m, 1H).  $^{13}\text{C}$  NMR (151 MHz, Chloroform-*d*)  $\delta$  166.2, 163.3, 157.9, 153.5 (d,  $J = 9.0$  Hz), 131.5, 122.6, 119.4, 113.6, 64.0, 55.4, 52.2 (d,  $J = 6.8$  Hz), 52.1 (d,  $J = 6.7$  Hz), 39.3 (d,  $J = 3.5$  Hz), 33.1 (d,  $J = 11.5$  Hz), 31.7 (d,  $J = 140.4$  Hz), 26.5, 24.3.  $^{31}\text{P}$  NMR (243 MHz, Chloroform-*d*)  $\delta$  31.7. HRMS (ESI) Calcd for  $\text{C}_{22}\text{H}_{30}\text{NO}_6\text{P}$ :  $[\text{M}] + \text{Na}^+ = 458.1703$ . Found: 458.1712.

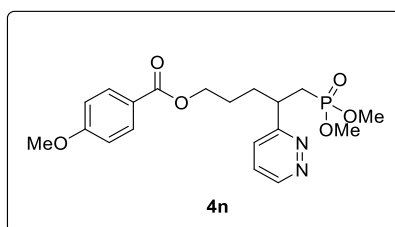

**5-(dimethoxyphosphoryl)-4-(pyridazin-3-yl)pentyl 4-methoxybenzoate (4n)**. Purified by flash column chromatography on silica gel (DCM : MeOH = 25 : 1). From 4-methoxyphenyl hex-5-enoate

(44.0 mg, 0.2 mmol), compound **4n** (46.0 mg, 57%) (major) was obtained. Colorless oil.  $^1\text{H}$  NMR (599 MHz, Chloroform-*d*)  $\delta$  9.10 (d,  $J = 3.2$  Hz, 1H), 7.95 (d,  $J = 8.5$  Hz, 2H), 7.42 (t,  $J = 6.6$  Hz, 1H), 7.38 (d,  $J = 8.4$  Hz, 1H), 6.91 (d,  $J = 8.4$  Hz, 2H), 4.23 (t,  $J = 6.6$  Hz, 2H), 3.86 (s, 3H), 3.58 (d,  $J = 10.9$  Hz, 3H), 3.51 (d,  $J = 10.9$  Hz, 3H), 3.38 – 3.35 (m, 1H), 2.62 – 2.58 (m, 1H), 2.29 – 2.23 (m, 1H), 2.11 – 2.02 (m, 2H), 1.71 – 1.68 (m, 1H), 1.56 – 1.52 (m, 1H).  $^{13}\text{C}$  NMR (151 MHz, Chloroform-*d*)  $\delta$  166.2, 164.6 (d,  $J = 5.0$  Hz), 163.3, 150.1, 131.5, 126.9, 126.3, 122.6, 113.6, 64.0, 55.4, 52.2 (d,  $J = 4.0$  Hz), 52.1 (d,  $J = 3.7$  Hz), 40.7 (d,  $J = 3.6$  Hz), 33.3 (d,  $J = 14.4$  Hz), 29.9 (d,  $J = 139.9$  Hz), 26.4.  $^{31}\text{P}$  NMR (243 MHz, Chloroform-*d*)  $\delta$  31.9. HRMS (ESI) Calcd for  $\text{C}_{19}\text{H}_{25}\text{N}_2\text{O}_6\text{P}$ :  $[\text{M}] + \text{Na}^+ = 431.1342$ . Found: 431.1353.

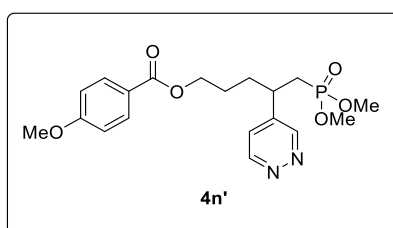

**5-(dimethoxyphosphoryl)-4-(pyridazin-4-yl)pentyl 4-methoxybenzoate (4n')**. Purified by flash column chromatography on silica gel (DCM : MeOH = 25 : 1), From 4-methoxyphenyl hex-5-enoate (44.0 mg, 0.2 mmol), compound **4n'** (17.7 mg, 21%) ( $\text{C}_4:\text{C}_3 = 2.6:1$ ) was obtained. Colorless oil.  $^1\text{H}$  NMR (599 MHz, Chloroform-*d*)  $\delta$  9.11 – 9.09 (m, 2H), 7.92 (d,  $J = 8.8$  Hz, 1H), 7.32 (d,  $J = 4.2$  Hz, 1H), 6.89 (d,  $J = 8.7$  Hz, 1H), 4.21 (t,  $J = 6.4$  Hz, 2H), 3.83 (s, 2H), 3.58 (d,  $J = 10.9$  Hz, 2H), 3.50 (d,  $J = 10.9$  Hz, 2H), 3.09 – 3.07 (m, 1H), 2.18 – 2.14 (m, 1H), 2.08 – 2.06 (m, 1H), 1.99 – 1.98 (m, 1H), 1.81 – 1.79 (m, 1H), 1.65 – 1.63 (m, 1H), 1.52 – 1.50 (m, 1H).  $^{13}\text{C}$  NMR (151 MHz, Chloroform-*d*)  $\delta$  166.1, 163.4, 151.8, 151.1, 143.0 (d,  $J = 7.0$  Hz), 131.5, 125.1, 122.4, 113.6, 63.6, 55.4, 52.3 (d,  $J = 6.7$  Hz), 52.2 (d,  $J = 6.7$  Hz), 37.6 (d,  $J = 3.9$  Hz), 33.1 (d,  $J = 13.3$  Hz), 31.1 (d,  $J = 142.1$  Hz), 26.4.  $^{31}\text{P}$  NMR (243 MHz, Chloroform-*d*)  $\delta$  30.2. HRMS (ESI) Calcd for  $\text{C}_{19}\text{H}_{25}\text{N}_2\text{O}_6\text{P}$ :  $[\text{M}] + \text{Na}^+ = 431.1342$ . Found: 431.1342.

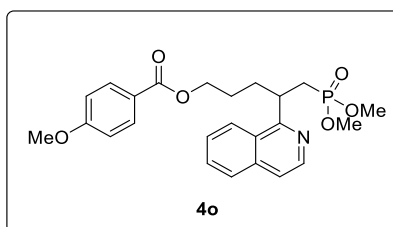

**5-(dimethoxyphosphoryl)-4-(isoquinolin-1-yl)pentyl 4-methoxybenzoate (4o)**. Purified by flash column chromatography on silica gel (DCM : MeOH = 25 : 1). From 4-methoxyphenyl hex-5-enoate



(44.0 mg, 0.2 mmol), compound **4o** (58.0 mg, 64%) (single isomer) was obtained. Colorless oil.  $^1\text{H}$  NMR (400 MHz, Chloroform-*d*)  $\delta$  8.51 (d,  $J = 5.6$  Hz, 1H), 8.31 (d,  $J = 8.2$  Hz, 1H), 7.93 (d,  $J = 9.1$  Hz, 2H), 7.83 (d,  $J = 8.1$  Hz, 1H), 7.68 (t,  $J = 6.9$  Hz, 1H), 7.61 (t,  $J = 7.0$  Hz, 1H), 7.54 (d,  $J = 5.7$  Hz, 1H), 6.88 (d,  $J = 9.0$  Hz, 2H), 4.26 – 2.24 (m, 1H), 4.18 (t,  $J = 6.5$  Hz, 2H), 3.85 (s, 3H), 3.50 (d,  $J = 10.8$  Hz, 3H), 3.38 (d,  $J = 10.8$  Hz, 3H), 2.74 – 2.69 (m, 1H), 2.31 – 2.26 (m, 1H), 2.19 – 2.16 (m, 1H), 2.06 – 2.02 (m, 1H), 1.68 – 1.65 (m, 1H), 1.52 – 1.48 (m, 1H).  $^{13}\text{C}$  NMR (101 MHz, Chloroform-*d*)  $\delta$  166.3, 163.3, 162.5 (d,  $J = 6.9$  Hz), 141.8, 136.3, 131.5, 129.9, 127.5, 127.4, 127.2, 124.6, 122.7, 119.6, 113.5, 64.3, 55.4, 52.0 (d,  $J = 5.0$  Hz), 52.0 (d,  $J = 5.4$  Hz), 35.3, 33.4 (d,  $J = 13.5$  Hz), 29.9 (d,  $J = 138.9$  Hz), 26.4.  $^{31}\text{P}$  NMR (162 MHz, Chloroform-*d*)  $\delta$  34.0. HRMS (ESI) Calcd for  $\text{C}_{24}\text{H}_{28}\text{NO}_6\text{P}$ :  $[\text{M}] + \text{Na}^+ = 480.1546$ . Found: 480.1546.

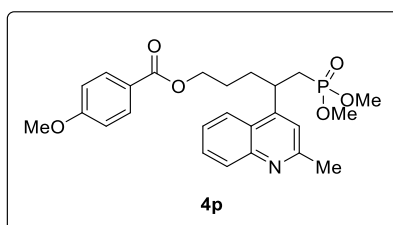

**5-(dimethoxyphosphoryl)-4-(2-methylquinolin-4-yl)pentyl 4-methoxybenzoate (4p)**. Purified by flash column chromatography on silica gel (DCM : MeOH = 25 : 1). From 4-methoxyphenyl hex-5-enoate (44.0 mg, 0.2 mmol), compound **4p** (76.0 mg, 81%) (single isomer) was obtained. Colorless oil.  $^1\text{H}$  NMR (400 MHz, Chloroform-*d*)  $\delta$  8.12 (d,  $J = 8.4$  Hz, 1H), 8.04 (d,  $J = 8.5$  Hz, 1H), 7.92 (d,  $J = 9.0$  Hz, 2H), 7.68 (ddd,  $J = 8.3, 6.8, 1.3$  Hz, 1H), 7.52 (ddd,  $J = 8.3, 6.8, 1.3$  Hz, 1H), 7.19 (s, 1H), 6.88 (d,  $J = 9.0$  Hz, 2H), 4.21 (t,  $J = 6.4$  Hz, 2H), 4.02 – 3.98 (m, 1H), 3.84 (s, 3H), 3.56 (d,  $J = 10.8$  Hz, 3H), 3.47 (d,  $J = 10.8$  Hz, 3H), 2.72 (s, 3H), 2.22 – 2.18 (m, 3H), 2.01 – 1.98 (m, 1H), 1.66 – 1.62 (m, 1H), 1.58 – 1.54 (m, 1H).  $^{13}\text{C}$  NMR (101 MHz, Chloroform-*d*)  $\delta$  166.2, 163.3, 158.5, 150.1 (d,  $J = 7.5$  Hz), 148.3, 131.5, 131.5, 129.6, 129.2, 125.8, 125.3, 122.7, 122.5, 113.5, 64.0, 55.4, 52.2 (d,  $J = 6.7$  Hz), 52.1 (d,  $J = 6.6$  Hz), 32.7 (d,  $J = 9.6$  Hz), 32.4, 31.0, 26.4, 25.4.  $^{31}\text{P}$  NMR (162 MHz, Chloroform-*d*)  $\delta$  32.3. HRMS (ESI) Calcd for  $\text{C}_{25}\text{H}_{30}\text{NO}_6\text{P}$ :  $[\text{M}] + \text{H}^+ = 472.1884$ . Found: 472.1899.

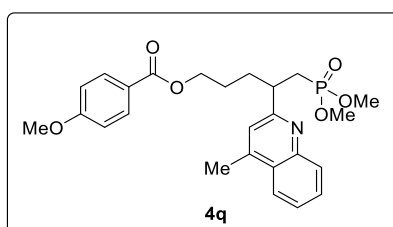

**5-(dimethoxyphosphoryl)-4-(4-methylquinolin-2-yl)pentyl 4-methoxybenzoate (4q).** Purified by flash column chromatography on silica gel (DCM : MeOH = 25 : 1). From 4-methoxyphenyl hex-5-enoate (44.0 mg, 0.2 mmol), compound **4q** (61.3 mg, 65%) (single isomer) was obtained. Colorless oil.  $^1\text{H}$  NMR (400 MHz, Chloroform-*d*)  $\delta$  8.03 (d,  $J = 8.4$  Hz, 1H), 7.97 – 7.89 (m, 3H), 7.66 (ddd,  $J = 8.4$ , 6.9, 1.4 Hz, 1H), 7.50 (ddd,  $J = 8.3$ , 6.8, 1.3 Hz, 1H), 7.15 (s, 1H), 6.87 (d,  $J = 8.9$  Hz, 2H), 4.21 (t,  $J = 6.5$  Hz, 2H), 3.83 (s, 3H), 3.51 (dd,  $J = 12.0$ , 10.8 Hz, 6H), 3.39 – 3.36 (m, 1H), 2.69 – 2.65 (m, 4H), 2.21 – 2.19 (m, 1H), 2.03 – 2.00 (m, 2H), 1.71 – 1.69 (m, 1H), 1.59 – 1.55 (m, 1H).  $^{13}\text{C}$  NMR (101 MHz, Chloroform-*d*)  $\delta$  166.2, 163.2, 162.6 (d,  $J = 7.8$  Hz), 147.7, 144.3, 131.4, 129.5, 129.0, 127.1, 125.7, 123.6, 122.7, 122.1, 113.4, 64.3, 55.3, 52.1 (d,  $J = 6.7$  Hz), 52.0 (d,  $J = 6.5$  Hz), 41.8 (d,  $J = 3.3$  Hz), 33.1 (d,  $J = 12.9$  Hz), 29.6 (d,  $J = 139.1$  Hz), 26.4, 18.7.  $^{31}\text{P}$  NMR (162 MHz, Chloroform-*d*)  $\delta$  33.9. HRMS (ESI) Calcd for  $\text{C}_{25}\text{H}_{30}\text{NO}_6\text{P}$ :  $[\text{M}] + \text{Na}^+ = 494.1703$ . Found: 494.1715.

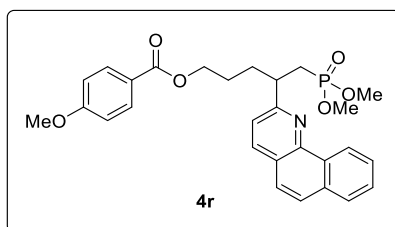

**4-(benzo[h]quinolin-2-yl)-5-(dimethoxyphosphoryl)pentyl 4-methoxybenzoate (4r).** Purified by flash column chromatography on silica gel (DCM : MeOH = 25 : 1). From 4-methoxyphenyl hex-5-enoate (44.0 mg, 0.2 mmol), compound **4r** (53.6 mg, 53%) (major) was obtained. Colorless oil.  $^1\text{H}$  NMR (599 MHz, Chloroform-*d*)  $\delta$  9.36 (d,  $J = 7.4$  Hz, 1H), 8.11 (d,  $J = 8.1$  Hz, 1H), 7.91 – 7.90 (m, 3H), 7.78 (d,  $J = 8.7$  Hz, 1H), 7.72 – 7.67 (m, 3H), 7.44 (d,  $J = 8.1$  Hz, 1H), 6.81 (d,  $J = 8.9$  Hz, 2H), 4.23 (q,  $J = 6.3$  Hz, 2H), 3.82 (s, 3H), 3.48 (dd,  $J = 10.8$ , 7.9 Hz, 7H), 2.85 – 2.83 (m, 1H), 2.33 – 2.31 (m, 1H), 2.22 – 2.20 (m, 1H), 2.08 – 2.06 (m, 1H), 1.75 – 1.73 (m, 1H), 1.60 – 1.58 (m, 1H).  $^{13}\text{C}$  NMR (151 MHz, Chloroform-*d*)  $\delta$  166.2, 163.2, 161.5 (d,  $J = 7.1$  Hz), 146.0, 136.0, 133.7, 131.4, 131.4, 128.0, 127.7, 127.0, 126.8, 125.2, 124.9, 124.5, 122.7, 122.3, 113.4, 64.3, 55.3, 52.0 (d,  $J = 5.5$  Hz), 52.0 (d,  $J = 5.2$  Hz), 42.0 (d,  $J = 3.4$  Hz), 33.8 (d,  $J = 13.8$  Hz), 30.3 (d,  $J = 139.0$  Hz), 26.40.  $^{31}\text{P}$  NMR (243 MHz, Chloroform-*d*)  $\delta$  33.3. HRMS (ESI) Calcd for  $\text{C}_{28}\text{H}_{30}\text{NO}_6\text{P}$ :  $[\text{M}] + \text{Na}^+ = 530.1703$ . Found: 530.1728.

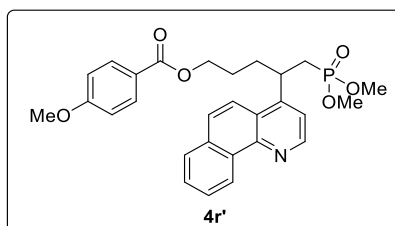

**4-(benzo[h]quinolin-4-yl)-5-(dimethoxyphosphoryl)pentyl 4-methoxybenzoate (4r')**. Purified by flash column chromatography on silica gel (DCM : MeOH = 25 : 1). From 4-methoxyphenyl hex-5-enoate (44.0 mg, 0.2 mmol), compound **4r'** (27.4 mg, 27%) (minor) was obtained. Colorless oil.  $^1\text{H}$  NMR (599 MHz, Chloroform-*d*)  $\delta$  9.34 (d,  $J = 8.1$  Hz, 1H), 8.98 (d,  $J = 4.6$  Hz, 1H), 8.10 (d,  $J = 9.2$  Hz, 1H), 7.92 – 7.86 (m, 4H), 7.75– 7.70 (m, 2H), 7.44 (d,  $J = 4.7$  Hz, 1H), 6.85 (d,  $J = 8.8$  Hz, 2H), 4.21 (q,  $J = 3.6$  Hz, 2H), 4.15 – 4.09 (m, 1H), 3.83 (s, 3H), 3.56 (d,  $J = 10.9$  Hz, 3H), 3.45 (d,  $J = 10.9$  Hz, 3H), 2.30 – 2.21 (m, 3H), 2.04 – 2.02 (m, 1H), 1.69 – 1.66 (m, 1H), 1.57 – 1.53 (m, 1H).  $^{13}\text{C}$  NMR (151 MHz, Chloroform-*d*)  $\delta$  166.2, 163.3, 149.9 (d,  $J = 9.1$  Hz), 148.8, 148.4, 146.9, 133.2, 131.9, 131.5, 128.3, 127.9, 127.6, 127.1, 124.9, 124.9, 122.5, 120.3, 113.5, 64.0, 55.4, 52.2 (d,  $J = 6.9$  Hz), 52.1 (d,  $J = 6.5$  Hz), 33.2 (d,  $J = 10.5$  Hz), 32.2, 31.3, 26.4.  $^{31}\text{P}$  NMR (243 MHz, Chloroform-*d*)  $\delta$  31.5. HRMS (ESI) Calcd for  $\text{C}_{28}\text{H}_{30}\text{NO}_6\text{P}$ :  $[\text{M}] + \text{Na}^+ = 530.1703$ . Found: 530.1733.

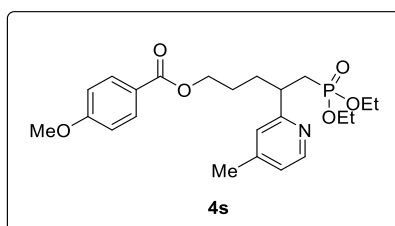

**5-(diethoxyphosphoryl)-4-(4-methylpyridin-2-yl)pentyl 4-methoxybenzoate (4s)**. Purified by flash column chromatography on silica gel (DCM : MeOH = 25 : 1). From 4-methoxyphenyl hex-5-enoate (44.0 mg, 0.2 mmol), compound **4s** (69.4 mg, 74%) (single isomer) was obtained. Colorless oil.  $^1\text{H}$  NMR (599 MHz, Chloroform-*d*)  $\delta$  8.40 (d,  $J = 4.9$  Hz, 1H), 7.94 (d,  $J = 8.9$  Hz, 2H), 7.00 (s, 1H), 6.94 (d,  $J = 4.9$  Hz, 1H), 6.88 (d,  $J = 8.6$  Hz, 2H), 4.19 (t,  $J = 6.4$  Hz, 2H), 3.96 – 3.91 (m, 2H), 3.85 – 3.83 (m, 5H), 3.17 – 3.13 (m, 1H), 2.41 – 2.39 (m, 1H), 2.30 (s, 3H), 2.12 – 2.06 (m, 1H), 1.93 – 1.90 (m, 2H), 1.64 – 1.62 (m, 1H), 1.49 – 1.46 (m, 1H), 1.17 (t,  $J = 7.0$  Hz, 3H), 1.12 (t,  $J = 7.0$  Hz, 3H).  $^{13}\text{C}$  NMR (151 MHz, Chloroform-*d*)  $\delta$  166.2, 163.2, 162.3 (d,  $J = 7.1$  Hz), 149.1, 147.3, 131.5, 124.5, 122.7, 122.7, 113.5, 64.3, 61.3 (d,  $J = 6.4$  Hz), 61.2 (d,  $J = 6.5$  Hz), 55.3, 41.4 (d,  $J = 3.3$  Hz), 33.1 (d,  $J = 13.8$  Hz), 31.1 (d,  $J = 139.3$  Hz), 26.5, 20.90, 16.2 (T,  $J = 7.6$  Hz).  $^{31}\text{P}$  NMR (162 MHz, Chloroform-*d*)  $\delta$  31.0. HRMS (ESI) Calcd for  $\text{C}_{23}\text{H}_{32}\text{NO}_6\text{P}$ :  $[\text{M}] + \text{Na}^+ = 472.1859$ . Found: 472.1854.

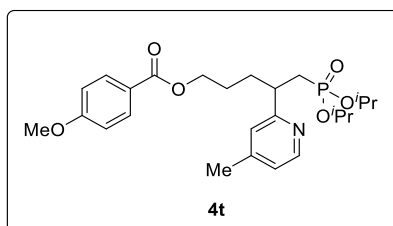

**5-(diisopropoxyphosphoryl)-4-(4-methylpyridin-2-yl)pentyl 4-methoxybenzoate (4t).** Purified by flash column chromatography on silica gel (DCM : MeOH = 25 : 1). From 4-methoxyphenyl hex-5-enoate (44.0 mg, 0.2 mmol), compound **4t** (66.4 mg, 70%) (single isomer) was obtained. Colorless oil.  $^1\text{H}$  NMR (400 MHz, Chloroform-*d*)  $\delta$  8.40 (d,  $J = 5.1$  Hz, 1H), 7.94 (d,  $J = 8.9$  Hz, 2H), 7.01 (s, 1H), 6.96 (d,  $J = 4.4$  Hz, 1H), 6.88 (d,  $J = 8.9$  Hz, 2H), 4.58 – 4.51 (m, 2H), 4.18 (t,  $J = 6.6$  Hz, 2H), 3.83 (s, 3H), 3.19 – 3.12 (m, 1H), 2.38 – 2.31 (m, 4H), 2.07 – 2.04 (m, 1H), 1.98 – 1.92 (m, 2H), 1.64 – 1.59 (m, 1H), 1.50 – 1.44 (m, 1H), 1.19 (dd,  $J = 6.2, 4.9$  Hz, 6H), 1.13 (dd,  $J = 11.9, 6.1$  Hz, 6H).  $^{13}\text{C}$  NMR (101 MHz, Chloroform-*d*)  $\delta$  166.2, 163.2, 162.2 (d,  $J = 6.7$  Hz), 148.6, 147.9, 131.5, 124.7, 122.7, 113.5, 69.8 (d,  $J = 6.7$  Hz), 69.7 (d,  $J = 6.8$  Hz), 64.3, 55.3, 41.6 (d,  $J = 3.7$  Hz), 33.0 (d,  $J = 13.1$  Hz), 32.7 (d,  $J = 140.9$  Hz), 26.6, 23.8 (ddd,  $J = 7.9, 4.5, 2.1$  Hz), 21.0.  $^{31}\text{P}$  NMR (162 MHz, Chloroform-*d*)  $\delta$  28.7. HRMS (ESI) Calcd for  $\text{C}_{25}\text{H}_{36}\text{NO}_6\text{P}$ :  $[\text{M}] + \text{Na}^+ = 500.2172$ . Found: 500.2189.

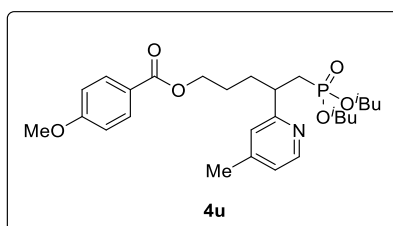

**5-(diisobutoxyphosphoryl)-4-(4-methylpyridin-2-yl)pentyl 4-methoxybenzoate (4u).** Purified by flash column chromatography on silica gel (DCM : MeOH = 25 : 1). From 4-methoxyphenyl hex-5-enoate (44.0 mg, 0.2 mmol), compound **4u** (70.1 mg, 70%) (single isomer) was obtained. Colorless oil.  $^1\text{H}$  NMR (400 MHz, Chloroform-*d*)  $\delta$  8.42 (d,  $J = 4.9$  Hz, 1H), 7.95 (d,  $J = 8.9$  Hz, 2H), 7.04 (s, 1H), 6.98 (d,  $J = 3.4$  Hz, 1H), 6.89 (d,  $J = 8.9$  Hz, 2H), 4.19 (t,  $J = 6.5$  Hz, 2H), 3.84 (s, 3H), 3.65 (q,  $J = 6.5$  Hz, 2H), 3.56 (t,  $J = 6.3$  Hz, 2H), 3.21 – 3.18 (m, 1H), 2.46 (q,  $J = 8.9$  Hz, 1H), 2.32 (s, 3H), 2.18 – 2.10 (m, 1H), 1.97 – 1.93 (m, 2H), 1.79 – 1.69 (m, 3H), 1.50 – 1.43 (m, 1H), 0.84 (dd,  $J = 6.7, 2.7$  Hz, 6H), 0.80 (dd,  $J = 6.7, 1.2$  Hz, 6H).  $^{13}\text{C}$  NMR (101 MHz, Chloroform-*d*)  $\delta$  166.2, 163.2, 162.2 (d,  $J = 6.4$  Hz), 148.9, 147.8, 131.5, 124.7, 122.8, 122.7, 113.5, 71.3 (t,  $J = 7.2$  Hz), 64.3, 55.4, 41.5 (d,  $J = 3.5$  Hz), 33.2 (d,  $J = 13.4$  Hz), 31.0 (d,  $J = 139.4$  Hz), 29.1 (d,  $J = 5.1$  Hz), 29.0 (d,  $J = 5.3$  Hz), 26.6, 21.0,

18.6 (d,  $J = 2.8$  Hz).  $^{31}\text{P}$  NMR (162 MHz, Chloroform- $d$ )  $\delta$  30.6. HRMS (ESI) Calcd for  $\text{C}_{27}\text{H}_{40}\text{NO}_6\text{P}$ :  $[\text{M}] + \text{Na}^+ = 528.2485$ . Found: 528.2506.

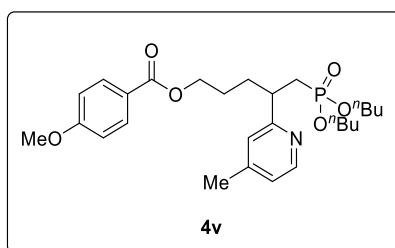

**5-(dibutoxyphosphoryl)-4-(4-methylpyridin-2-yl)pentyl 4-methoxybenzoate (4v)**. Purified by flash column chromatography on silica gel (DCM : MeOH = 25 : 1). From 4-methoxyphenyl hex-5-enoate (44.0 mg, 0.2 mmol), compound **4v** (67.86 mg, 67%) (single isomer) was obtained. Colorless oil.  $^1\text{H}$  NMR (400 MHz, Chloroform- $d$ )  $\delta$  8.38 (d,  $J = 5.0$  Hz, 1H), 7.91 (d,  $J = 9.0$  Hz, 2H), 6.98 (s, 1H), 6.93 (d,  $J = 4.9$  Hz, 1H), 6.85 (d,  $J = 9.0$  Hz, 2H), 4.16 (t,  $J = 6.5$  Hz, 2H), 3.81 – 3.75 (m, 7H), 3.15 – 3.12 (m, 1H), 2.42 – 2.37 (m, 1H), 2.28 (s, 3H), 2.11 – 2.06 (m, 1H), 1.91 – 1.88 (m, 2H), 1.63 – 1.59 (m, 1H), 1.46 – 1.42 (m, 5H), 1.26 – 1.21 (m, 4H), 0.83 (td,  $J = 7.4, 5.3$  Hz, 6H).  $^{13}\text{C}$  NMR (101 MHz, Chloroform- $d$ )  $\delta$  166.1, 163.1, 162.1 (d,  $J = 6.9$  Hz), 148.8, 147.6, 131.4, 124.6, 122.6, 122.6, 113.4, 64.9 (dd,  $J = 11.6, 6.7$  Hz), 64.2, 55.2, 41.4 (d,  $J = 3.3$  Hz), 33.1 (d,  $J = 13.7$  Hz), 32.3 (d,  $J = 4.3$  Hz), 32.2 (d,  $J = 4.2$  Hz), 30.9 (d,  $J = 139.3$  Hz), 26.5, 20.9, 18.5 (d,  $J = 2.9$  Hz), 13.4.  $^{31}\text{P}$  NMR (162 MHz, Chloroform- $d$ )  $\delta$  30.9. HRMS (ESI) Calcd for  $\text{C}_{27}\text{H}_{40}\text{NO}_6\text{P}$ :  $[\text{M}] + \text{H}^+ = 506.2666$ . Found: 506.2679.

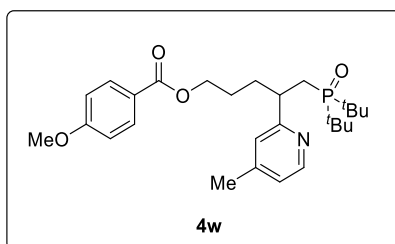

**5-(di-tert-butylphosphoryl)-4-(4-methylpyridin-2-yl)pentyl 4-methoxybenzoate (4w)**. Purified by flash column chromatography on silica gel (DCM : MeOH = 25 : 1). From 4-methoxyphenyl hex-5-enoate (44.0 mg, 0.2 mmol), compound **4w** (45.3 mg, 48%) (single isomer) was obtained. White solid.  $^1\text{H}$  NMR (400 MHz, Chloroform- $d$ )  $\delta$  8.40 (d,  $J = 5.0$  Hz, 1H), 7.94 (d,  $J = 9.0$  Hz, 2H), 7.07 (s, 1H), 6.92 (d,  $J = 4.4$  Hz, 1H), 6.87 (d,  $J = 9.0$  Hz, 2H), 4.19 – 4.15 (m, 2H), 3.82 (s, 3H), 3.29 – 3.25 (m, 1H), 2.33 – 2.29 (m, 4H), 2.00 – 1.96 (m, 3H), 1.64 – 1.61 (m, 1H), 1.45 – 1.41 (m, 1H), 1.24 (d,  $J = 13.0$  Hz, 9H), 1.05 (d,  $J = 13.2$  Hz, 9H).  $^{13}\text{C}$  NMR (101 MHz, Chloroform- $d$ )  $\delta$  166.2, 163.3 (d,  $J = 4.4$  Hz), 163.1, 148.8, 147.5, 131.5, 125.5, 122.8, 122.5, 113.4, 64.5, 55.3, 41.4 (d,  $J = 3.6$  Hz), 35.9 (d,  $J$

= 15.9 Hz), 35.3 (d,  $J = 16.2$  Hz), 33.8 (d,  $J = 6.4$  Hz), 26.9, 26.3, 26.2 (d,  $J = 54.3$  Hz), 26.1, 21.0.  $^{31}\text{P}$  NMR (162 MHz, Chloroform- $d$ )  $\delta$  60.0. HRMS (ESI) Calcd for  $\text{C}_{27}\text{H}_{40}\text{NO}_4\text{P}$ :  $[\text{M}] + \text{Na}^+ = 496.2587$ . Found: 496.2584.

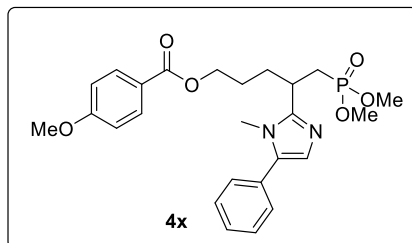

**5-(dimethoxyphosphoryl)-4-(1-methyl-5-phenyl-1H-imidazol-2-yl)pentyl 4-methoxybenzoate (4x).** Purified by flash column chromatography on silica gel (DCM : MeOH = 25 : 1), From 4-methoxyphenyl hex-5-enoate (44.0 mg, 0.2 mmol), compound **4x** (48.5 mg, 50%) (single isomer) was obtained. Colorless oil.  $^1\text{H}$  NMR (599 MHz, Chloroform- $d$ )  $\delta$  7.98 (d,  $J = 8.4$  Hz, 2H), 7.43 (t,  $J = 7.6$  Hz, 2H), 7.37 – 7.35 (m, 3H), 7.05 (s, 1H), 6.90 (d,  $J = 8.6$  Hz, 2H), 4.25 (t,  $J = 6.5$  Hz, 2H), 3.85 (s, 3H), 3.63 (s, 3H), 3.61 (d,  $J = 10.9$  Hz, 3H), 3.49 (d,  $J = 10.9$  Hz, 3H), 3.36 – 3.34 (m, 1H), 2.51 – 2.50 (m, 1H), 2.21 – 2.16 (m, 1H), 2.10 – 2.08 (m, 1H), 1.97 – 1.94 (m, 1H), 1.75 – 1.72 (m, 1H), 1.67 – 1.65 (m, 1H).  $^{13}\text{C}$  NMR (151 MHz, Chloroform- $d$ )  $\delta$  166.3, 163.3, 150.5 (d,  $J = 5.6$  Hz), 133.2, 131.6, 130.3, 128.8, 128.6, 127.7, 126.6, 122.7, 113.6, 64.1, 55.4, 52.3 (d,  $J = 6.7$  Hz), 52.1 (d,  $J = 6.4$  Hz), 33.2 (d,  $J = 15.4$  Hz), 31.6 (d,  $J = 3.8$  Hz), 31.1, 30.1 (d,  $J = 138.9$  Hz), 26.5.  $^{31}\text{P}$  NMR (243 MHz, Chloroform- $d$ )  $\delta$  32.3. HRMS (ESI) Calcd for  $\text{C}_{25}\text{H}_{31}\text{N}_2\text{O}_6\text{P}$ :  $[\text{M}] + \text{H}^+ = 487.1992$ . Found: 487.1942.

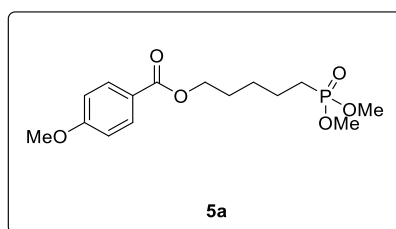

**5-(dimethoxyphosphoryl)pentyl 4-methoxybenzoate (5a).** Purified by flash column chromatography on silica gel (DCM : MeOH = 35 : 1), colorless oil.  $^1\text{H}$  NMR (599 MHz, Chloroform- $d$ )  $\delta$  7.99 (d,  $J = 8.8$  Hz, 2H), 6.92 (d,  $J = 8.8$  Hz, 2H), 4.29 (t,  $J = 6.5$  Hz, 2H), 3.86 (s, 3H), 3.74 (d,  $J = 10.8$  Hz, 6H), 1.79 – 1.75 (m, 4H), 1.71 – 1.68 (m, 2H), 1.56 – 1.51 (m, 2H).  $^{13}\text{C}$  NMR (151 MHz, Chloroform- $d$ )  $\delta$  166.2, 163.2, 131.4, 122.7, 113.5, 64.2, 55.3, 52.3, 52.3, 28.3, 27.0 (d,  $J = 16.8$  Hz), 24.5 (d,  $J = 140.7$  Hz), 22.0 (d,  $J = 5.0$  Hz).  $^{31}\text{P}$  NMR (162 MHz, Chloroform- $d$ )  $\delta$  35.3. HRMS (ESI) Calcd for  $\text{C}_{15}\text{H}_{23}\text{O}_6\text{P}$ :  $[\text{M}] + \text{Na}^+ = 353.1124$ . Found: 353.1124.

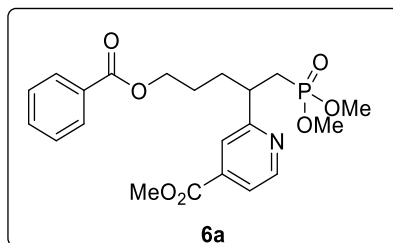

**methyl 2-(5-(benzoyloxy)-1-(dimethoxyphosphoryl)pentan-2-yl)isonicotinate (6a).** Purified by flash column chromatography on silica gel (DCM : MeOH = 25 : 1). From pent-4-en-1-yl benzoate (38.0 mg, 0.2 mmol), compound **6a** (64.4 mg, 74%) was obtained. Colorless oil.  $^1\text{H}$  NMR (599 MHz, Chloroform-*d*)  $\delta$  8.72 (d,  $J$  = 5.0 Hz, 1H), 7.99 (d,  $J$  = 7.3 Hz, 2H), 7.73 (s, 1H), 7.69 (d,  $J$  = 3.7 Hz, 1H), 7.53 (t,  $J$  = 7.4 Hz, 1H), 7.42 (t,  $J$  = 7.7 Hz, 2H), 4.23 (t,  $J$  = 6.5 Hz, 2H), 3.94 (s, 3H), 3.55 (d,  $J$  = 10.8 Hz, 3H), 3.51 (d,  $J$  = 10.9 Hz, 3H), 3.31 – 3.29 (m, 1H), 2.46 – 2.41 (m, 1H), 2.18 – 2.12 (m, 1H), 1.97 – 1.94 (m, 2H), 1.69 – 1.66 (m, 1H), 1.49 – 1.47 (m, 1H).  $^{13}\text{C}$  NMR (151 MHz, Chloroform-*d*)  $\delta$  166.4, 165.6, 163.8 (d,  $J$  = 7.3 Hz), 150.4, 137.6, 132.8, 130.2, 129.5, 128.3, 122.5, 121.0, 64.4, 52.6, 52.1 (d,  $J$  = 3.6 Hz), 52.0 (d,  $J$  = 4.0 Hz), 41.7 (d,  $J$  = 3.4 Hz), 33.1 (d,  $J$  = 13.9 Hz), 30.1 (d,  $J$  = 139.9 Hz), 26.4.  $^{31}\text{P}$  NMR (243 MHz, Chloroform-*d*)  $\delta$  32.4. HRMS (ESI) Calcd for  $\text{C}_{21}\text{H}_{26}\text{NO}_7\text{P}$ :  $[\text{M}] + \text{Na}^+ = 458.1339$ . Found: 458.1359.

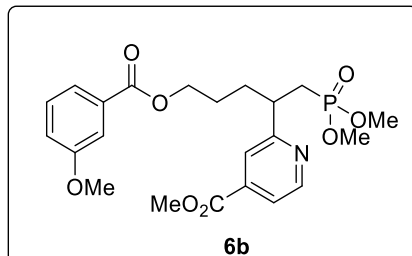

**methyl 2-(1-(dimethoxyphosphoryl)-5-((3-methoxybenzoyl)oxy)pentan-2-yl)isonicotinate (6b).** Purified by flash column chromatography on silica gel (DCM : MeOH = 25 : 1). From pent-4-en-1-yl 3-methoxybenzoate (44.0 mg, 0.2 mmol), compound **6b** (73.5 mg, 79%) was obtained. Colorless oil.  $^1\text{H}$  NMR (599 MHz, Chloroform-*d*)  $\delta$  8.72 (d,  $J$  = 5.0 Hz, 1H), 7.73 (s, 1H), 7.69 (d,  $J$  = 5.0 Hz, 1H), 7.58 (d,  $J$  = 7.6 Hz, 1H), 7.51 (s, 1H), 7.32 (t,  $J$  = 7.9 Hz, 1H), 7.08 (dd,  $J$  = 8.1, 2.5 Hz, 1H), 4.22 (t,  $J$  = 6.6 Hz, 2H), 3.94 (s, 3H), 3.83 (s, 3H), 3.53 (dd,  $J$  = 22.0, 10.8 Hz, 6H), 3.30 – 3.28 (m, 1H), 2.47 – 2.43 (m, 1H), 2.17 – 2.12 (m, 1H), 1.96 – 1.93 (m, 2H), 1.68 – 1.66 (m, 1H), 1.48 – 1.47 (m, 1H).  $^{13}\text{C}$  NMR (151 MHz, Chloroform-*d*)  $\delta$  166.3, 165.6, 163.8 (d,  $J$  = 7.1 Hz), 159.5, 150.4, 131.5, 129.3, 122.5, 121.9, 121.0, 119.2, 114.1, 64.5, 55.4, 52.6, 52.1 (d,  $J$  = 3.9 Hz), 52.0 (d,  $J$  = 4.1 Hz), 41.7 (d,  $J$  = 3.5 Hz), 33.1 (d,  $J$  = 13.8 Hz), 30.2 (d,  $J$  = 139.9 Hz), 26.4.  $^{31}\text{P}$  NMR (243 MHz, Chloroform-*d*)  $\delta$  32.4. HRMS (ESI) Calcd for  $\text{C}_{22}\text{H}_{28}\text{NO}_8\text{P}$ :  $[\text{M}] + \text{Na}^+ = 488.1445$ . Found: 488.1454.

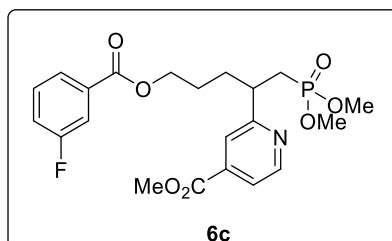

**methyl 2-(1-(dimethoxyphosphoryl)-5-((3-fluorobenzoyl)oxy)pentan-2-yl)isonicotinate (6c).**

Purified by flash column chromatography on silica gel (DCM : MeOH = 25 : 1). From pent-4-en-1-yl 3-fluorobenzoate (41.6 mg, 0.2 mmol), compound **6c** (65.6 mg, 73%) was obtained. Colorless oil.  $^1\text{H}$  NMR (599 MHz, Chloroform-*d*)  $\delta$  8.72 (d,  $J = 5.0$  Hz, 1H), 7.77 (d,  $J = 7.7$  Hz, 1H), 7.72 (s, 1H), 7.69 (d,  $J = 4.1$  Hz, 1H), 7.65 (d,  $J = 9.2$  Hz, 1H), 7.40 – 7.37 (m, 1H), 7.23 (td,  $J = 8.3, 2.6$  Hz, 1H), 4.22 (t,  $J = 6.5$  Hz, 2H), 3.93 (s, 3H), 3.53 (dd,  $J = 23.7, 10.8$  Hz, 6H), 3.30 – 3.28 (m, 1H), 2.44 – 2.42 (m, 1H), 2.16 – 2.11 (m, 1H), 1.96 – 1.95 (m, 2H), 1.68 – 1.65 (m, 1H), 1.48 – 1.46 (m, 1H).  $^{13}\text{C}$  NMR (151 MHz, Chloroform-*d*)  $\delta$  165.6, 165.2 (d,  $J = 3.0$  Hz), 163.7 (d,  $J = 7.4$  Hz), 162.4 (d,  $J = 247.0$  Hz), 150.4, 137.6, 132.4 (d,  $J = 7.3$  Hz), 129.9 (d,  $J = 7.6$  Hz), 125.2 (d,  $J = 3.0$  Hz), 122.5, 121.0, 119.9 (d,  $J = 21.3$  Hz), 116.3 (d,  $J = 22.8$  Hz), 64.8, 52.6, 52.1 (d,  $J = 3.3$  Hz), 52.0 (d,  $J = 3.5$  Hz), 41.6 (d,  $J = 3.4$  Hz), 33.0 (d,  $J = 13.6$  Hz), 30.2 (d,  $J = 139.8$  Hz), 26.3.  $^{31}\text{P}$  NMR (243 MHz, Chloroform-*d*)  $\delta$  32.3.  $^{19}\text{F}$  NMR (564 MHz, Chloroform-*d*)  $\delta$  -112.5 (d,  $J = 5.6$  Hz). HRMS (ESI) Calcd for  $\text{C}_{21}\text{H}_{25}\text{FNO}_7\text{P}$ : [M] +  $\text{Na}^+$  = 476.1245. Found: 476.1258.

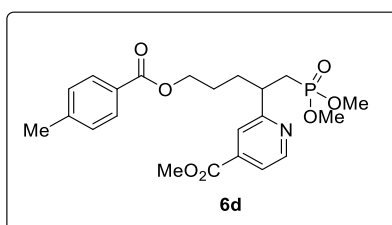

**methyl 2-(1-(dimethoxyphosphoryl)-5-((4-methylbenzoyl)oxy)pentan-2-yl)isonicotinate (6d).**

Purified by flash column chromatography on silica gel (DCM : MeOH = 25 : 1). From pent-4-en-1-yl 4-methylbenzoate (40.8 mg, 0.2 mmol), compound **6d** (75.4 mg, 84%) was obtained. Colorless oil.  $^1\text{H}$  NMR (599 MHz, Chloroform-*d*)  $\delta$  8.72 (d,  $J = 5.0$  Hz, 1H), 7.88 (d,  $J = 8.0$  Hz, 2H), 7.73 (s, 1H), 7.70 (d,  $J = 5.0$  Hz, 1H), 7.21 (d,  $J = 7.9$  Hz, 2H), 4.21 (t,  $J = 6.6$  Hz, 2H), 3.94 (s, 3H), 3.53 (dd,  $J = 21.8, 10.8$  Hz, 6H), 3.30 – 3.28 (m, 1H), 2.49 – 2.43 (m, 1H), 2.39 (s, 3H), 2.17 – 2.12 (m, 1H), 1.97 – 1.93 (m, 2H), 1.68 – 1.65 (m, 1H), 1.48 – 1.46 (m, 1H).  $^{13}\text{C}$  NMR (151 MHz, Chloroform-*d*)  $\delta$  166.5, 165.6, 163.8 (d,  $J = 7.0$  Hz), 150.3, 143.4, 137.6, 129.5, 129.0, 127.5, 122.5, 121.0, 64.3, 52.6, 52.1 (d,  $J = 4.0$



Hz), 52.0 (d,  $J = 4.0$  Hz), 41.7 (d,  $J = 3.5$  Hz), 33.2 (d,  $J = 13.9$  Hz), 30.1 (d,  $J = 139.9$  Hz), 26.4, 21.6.  $^{31}\text{P}$  NMR (243 MHz, Chloroform- $d$ )  $\delta$  32.4. HRMS (ESI) Calcd for  $\text{C}_{22}\text{H}_{28}\text{NO}_7\text{P}$ :  $[\text{M}] + \text{Na}^+ = 472.1496$ . Found: 472.1488.

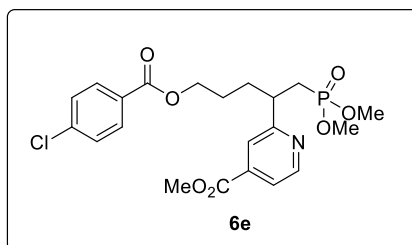

**methyl 2-(5-((4-chlorobenzoyl)oxy)-1-(dimethoxyphosphoryl)pentan-2-yl)isonicotinate (6e).**

Purified by flash column chromatography on silica gel (DCM : MeOH = 25 : 1). From pent-4-en-1-yl 4-chlorobenzoate (44.8 mg, 0.2 mmol), compound **6e** (75.0 mg, 80%) was obtained. Colorless oil.  $^1\text{H}$  NMR (599 MHz, Chloroform- $d$ )  $\delta$  8.72 (d,  $J = 6.0$  Hz, 2H), 7.91 (d,  $J = 8.1$  Hz, 3H), 7.72 (s, 2H), 7.69 (d,  $J = 3.5$  Hz, 1H), 7.38 (d,  $J = 8.1$  Hz, 3H), 4.21 (t,  $J = 6.3$  Hz, 2H), 3.93 (s, 2H), 3.55 (d,  $J = 10.9$  Hz, 1H), 3.51 (d,  $J = 10.9$  Hz, 1H), 3.30 – 3.28 (m, 1H), 2.47 – 2.40 (m, 1H), 2.17 – 2.10 (m, 1H), 1.97 – 1.91 (m, 3H), 1.70 – 1.62 (m, 1H), 1.50 – 1.40 (m, 1H).  $^{13}\text{C}$  NMR (151 MHz, Chloroform- $d$ )  $\delta$  165.6, 165.5, 163.7 (d,  $J = 7.3$  Hz), 150.4, 139.2, 137.6, 130.9, 128.7, 128.6, 122.5, 121.0, 64.7, 52.6, 52.1 (d,  $J = 4.2$  Hz), 52.0 (d,  $J = 4.4$  Hz), 41.6 (d,  $J = 3.4$  Hz), 33.0 (d,  $J = 13.5$  Hz), 30.2 (d,  $J = 140.3$  Hz), 26.3.  $^{31}\text{P}$  NMR (243 MHz, Chloroform- $d$ )  $\delta$  32.3. HRMS (ESI) Calcd for  $\text{C}_{21}\text{H}_{25}\text{ClNO}_7\text{P}$ :  $[\text{M}] + \text{Na}^+ = 492.0949$ . Found: 492.0978.

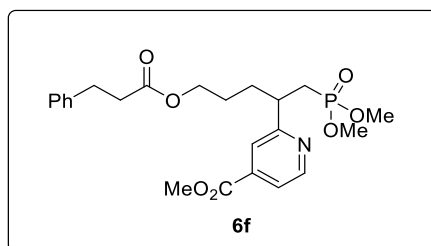

**methyl 2-(1-(dimethoxyphosphoryl)-5-((3-phenylpropanoyl)oxy)pentan-2-yl)isonicotinate (6f).**

Purified by flash column chromatography on silica gel (DCM : MeOH = 25 : 1). From pent-4-en-1-yl 3-phenylpropanoate (43.6 mg, 0.2 mmol), compound **6f** (67.6 mg, 73%) was obtained. Colorless oil.  $^1\text{H}$  NMR (599 MHz, Chloroform- $d$ )  $\delta$  8.71 (d,  $J = 4.9$  Hz, 1H), 7.69 – 7.68 (m, 2H), 7.25 (t,  $J = 7.5$  Hz, 2H), 7.17 (t,  $J = 8.5$  Hz, 3H), 3.96 (t,  $J = 6.6$  Hz, 2H), 3.93 (s, 3H), 3.54 (d,  $J = 10.8$  Hz, 3H), 3.50 (d,  $J = 10.8$  Hz, 3H), 3.23 – 3.20 (m, 1H), 2.90 (t,  $J = 7.8$  Hz, 2H), 2.58 (t,  $J = 7.8$  Hz, 2H), 2.44 – 2.40 (m, 1H), 2.12 – 2.06 (m, 1H), 1.81 – 1.78 (m, 2H), 1.50 – 1.47 (m, 1H), 1.31 – 1.29 (m, 1H).  $^{13}\text{C}$  NMR (151

MHz, Chloroform-*d*)  $\delta$  172.74, 165.6, 163.8 (d,  $J = 6.8$  Hz), 150.3, 140.4, 137.6, 128.4, 128.2, 126.2, 122.5, 121.0, 64.0, 52.6, 52.1 (d,  $J = 6.2$  Hz), 52.0 (d,  $J = 6.4$  Hz), 41.6 (d,  $J = 3.5$  Hz), 35.8, 33.1 (d,  $J = 14.1$  Hz), 30.9, 30.1 (d,  $J = 139.8$  Hz), 26.3.  $^{31}\text{P}$  NMR (243 MHz, Chloroform-*d*)  $\delta$  32.4. HRMS (ESI) Calcd for  $\text{C}_{22}\text{H}_{30}\text{NO}_7\text{P}$ :  $[\text{M}] + \text{Na}^+ = 486.1652$ . Found: 486.1685.

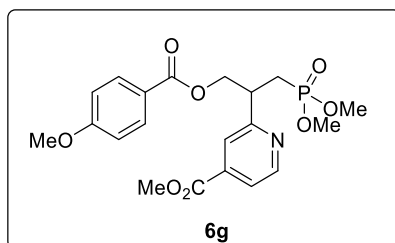

**methyl 2-(1-(dimethoxyphosphoryl)-3-((4-methoxybenzoyl)oxy)propan-2-yl)isonicotinate (6g).**

Purified by flash column chromatography on silica gel (DCM : MeOH = 25 : 1). From allyl 4-methoxybenzoate (38.4 mg, 0.2 mmol), compound **6g** (61.1 mg, 70%) was obtained. Colorless oil.  $^1\text{H}$  NMR (599 MHz, Chloroform-*d*)  $\delta$  8.73 (d,  $J = 4.9$  Hz, 1H), 7.87 (d,  $J = 8.8$  Hz, 2H), 7.85 (s, 1H), 7.73 (d,  $J = 5.0$  Hz, 1H), 6.87 (d,  $J = 8.8$  Hz, 2H), 4.53 (d,  $J = 6.7$  Hz, 2H), 3.94 (s, 3H), 3.84 (s, 3H), 3.75 – 3.72 (m, 1H), 3.57 (dd,  $J = 10.9, 5.7$  Hz, 6H), 2.61 – 2.54 (m, 1H), 2.35 – 2.29 (m, 1H).  $^{13}\text{C}$  NMR (151 MHz, Chloroform-*d*)  $\delta$  165.7, 165.5, 163.4, 161.0 (d,  $J = 6.5$  Hz), 150.2, 137.7, 131.5, 123.0, 122.1, 121.4, 113.6, 67.4 (d,  $J = 16.0$  Hz), 55.4, 52.7, 52.2 (d,  $J = 6.4$  Hz), 41.4 (d,  $J = 3.2$  Hz), 26.1 (d,  $J = 142.3$  Hz).  $^{31}\text{P}$  NMR (243 MHz, Chloroform-*d*)  $\delta$  31.9. HRMS (ESI) Calcd for  $\text{C}_{20}\text{H}_{24}\text{NO}_8\text{P}$ :  $[\text{M}] + \text{H} = 460.1132$ . Found: 460.1148.

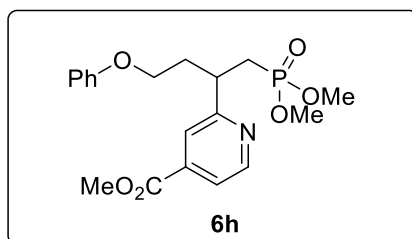

**methyl 2-(1-(dimethoxyphosphoryl)-4-phenoxybutan-2-yl)isonicotinate (6h).**

Purified by flash column chromatography on silica gel (DCM : MeOH = 25 : 1). From (but-3-en-1-yloxy)benzene (29.6 mg, 0.2 mmol), compound **6h** (62.9 mg, 80%) was obtained. Colorless oil.  $^1\text{H}$  NMR (599 MHz, Chloroform-*d*)  $\delta$  8.73 (d,  $J = 4.9$  Hz, 1H), 7.74 (s, 1H), 7.69 (d,  $J = 5.0$  Hz, 1H), 7.22 (t,  $J = 8.0$  Hz, 2H), 6.90 (t,  $J = 7.3$  Hz, 1H), 6.77 (d,  $J = 8.0$  Hz, 2H), 3.91 (s, 3H), 3.87 – 3.85 (m, 1H), 3.70 – 3.68 (m, 1H), 3.59 – 3.52 (m, 7H), 2.50 – 3.48 (m, 1H), 2.31 – 2.29 (m, 2H), 2.23 – 2.18 (m, 1H).  $^{13}\text{C}$  NMR (151 MHz, Chloroform-*d*)  $\delta$  165.6, 163.5 (d,  $J = 6.9$  Hz), 158.6, 150.3, 137.6, 129.3, 122.8, 121.0, 120.6,

114.4, 65.0, 52.6, 52.1, 52.1, 38.8 (d,  $J = 3.4$  Hz), 35.9 (d,  $J = 14.0$  Hz), 30.1 (d,  $J = 140.0$  Hz).  $^{31}\text{P}$  NMR (243 MHz, Chloroform-*d*)  $\delta$  32.2. HRMS (ESI) Calcd for  $\text{C}_{19}\text{H}_{24}\text{NO}_6\text{P}$ :  $[\text{M}] + \text{Na}^+ = 416.1233$ . Found: 416.1230.

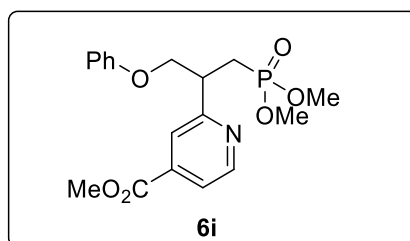

**methyl 2-(1-(dimethoxyphosphoryl)-3-phenoxypropan-2-yl)isonicotinate (6i)**. Purified by flash column chromatography on silica gel (DCM : MeOH = 25 : 1). From (allyloxy)benzene (26.8 mg, 0.2 mmol), compound **6i** (60.6 mg, 80%) was obtained. Colorless oil.  $^1\text{H}$  NMR (599 MHz, Chloroform-*d*)  $\delta$  8.72 (d,  $J = 5.0$  Hz, 1H), 7.87 (s, 1H), 7.73 (d,  $J = 5.0$  Hz, 1H), 7.24 (t,  $J = 8.0$  Hz, 2H), 6.93 (t,  $J = 7.3$  Hz, 1H), 6.85 (d,  $J = 8.6$  Hz, 2H), 4.24 (d,  $J = 6.3$  Hz, 2H), 3.96 (s, 3H), 3.75 – 3.73 (m, 1H), 3.59 (dd,  $J = 10.9, 3.1$  Hz, 6H), 2.52 – 2.43 (m, 2H).  $^{13}\text{C}$  NMR (151 MHz, Chloroform-*d*)  $\delta$  165.6, 161.4 (d,  $J = 7.0$  Hz), 158.4, 150.1, 137.7, 129.4, 123.1, 121.3, 121.0, 114.7, 70.9 (d,  $J = 14.6$  Hz), 52.6, 52.2 (d,  $J = 4.3$  Hz), 52.2 (d,  $J = 4.3$  Hz), 41.9 (d,  $J = 3.0$  Hz), 26.0 (d,  $J = 142.0$  Hz).  $^{31}\text{P}$  NMR (243 MHz, Chloroform-*d*)  $\delta$  32.3. HRMS (ESI) Calcd for  $\text{C}_{18}\text{H}_{22}\text{NO}_6\text{P}$ :  $[\text{M}] + \text{Na}^+ = 402.1077$ . Found: 402.1080.

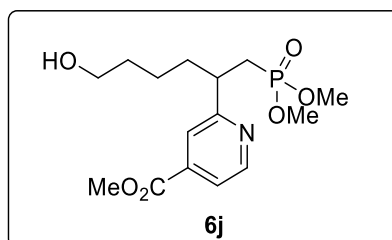

**methyl 2-(1-(dimethoxyphosphoryl)-6-hydroxyhexan-2-yl)isonicotinate (6j)**. Purified by flash column chromatography on silica gel (DCM : MeOH = 20 : 1). From hex-5-en-1-ol (20.0 mg, 0.2 mmol), compound **6j** (44.1 mg, 64%) was obtained. Colorless oil.  $^1\text{H}$  NMR (599 MHz, Chloroform-*d*)  $\delta$  8.70 (d,  $J = 4.9$  Hz, 1H), 7.69 – 7.67 (m, 2H), 3.94 (s, 3H), 3.55 – 3.50 (m, 8H), 3.24 – 3.22 (m, 1H), 2.41 – 2.39 (m, 1H), 2.13 – 2.12 (m, 1H), 2.00 (s, 1H), 1.82 – 1.80 (m, 2H), 1.50 – 1.48 (m, 2H), 1.26 – 1.24 (m, 1H), 1.11 – 1.09 (m, 1H).  $^{13}\text{C}$  NMR (151 MHz, Chloroform-*d*)  $\delta$  165.7, 164.3 (d,  $J = 7.3$  Hz), 150.2, 137.5, 122.4, 120.8, 62.3, 52.6, 52.1 (d,  $J = 6.0$  Hz), 52.0 (d,  $J = 6.3$  Hz), 41.8 (d,  $J = 3.5$  Hz), 36.4 (d,  $J = 13.3$  Hz), 32.4, 29.9 (d,  $J = 139.6$  Hz), 23.2.  $^{31}\text{P}$  NMR (243 MHz, Chloroform-*d*)  $\delta$  32.8. HRMS (ESI) Calcd for  $\text{C}_{15}\text{H}_{24}\text{NO}_6\text{P}$ :  $[\text{M}] + \text{Na}^+ = 368.1233$ . Found: 368.1260.

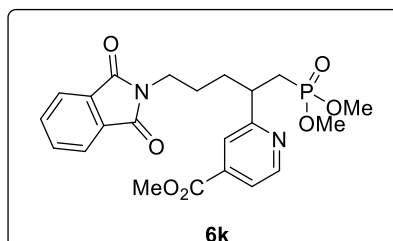

**methyl 2-(1-(dimethoxyphosphoryl)-5-(1,3-dioxoisindolin-2-yl)pentan-2-yl)isonicotinate (6k).**

Purified by flash column chromatography on silica gel (DCM : MeOH = 25 : 1). From 2-(pent-4-en-1-yl)isoindoline-1,3-dione (43.0 mg, 0.2 mmol), compound **6k** (68.5 mg, 75%) was obtained. Colorless oil.  $^1\text{H}$  NMR (599 MHz, Chloroform-*d*)  $\delta$  8.65 (d,  $J$  = 4.9 Hz, 1H), 7.78 (dd,  $J$  = 5.5, 3.0 Hz, 2H), 7.68 – 7.64 (m, 4H), 3.91 (s, 3H), 3.59 (t,  $J$  = 7.2 Hz, 2H), 3.50 (dd,  $J$  = 14.8, 10.8 Hz, 6H), 3.25 – 2.22 (m, 1H), 2.42 – 2.40 (m, 1H), 2.11 – 2.06 (m, 1H), 1.84 – 1.79 (m, 2H), 1.58 – 1.55 (m, 1H), 1.36 – 1.34 (m, 1H).  $^{13}\text{C}$  NMR (151 MHz, Chloroform-*d*)  $\delta$  168.2, 165.6, 163.6 (d,  $J$  = 6.5 Hz), 150.3, 137.6, 133.8, 132.0, 123.1, 122.5, 121.0, 52.6, 52.1 (d,  $J$  = 4.1 Hz), 52.0 (d,  $J$  = 4.0 Hz), 41.6 (d,  $J$  = 3.5 Hz), 37.6, 33.9 (d,  $J$  = 14.2 Hz), 29.9 (d,  $J$  = 139.8 Hz), 26.2.  $^{31}\text{P}$  NMR (243 MHz, Chloroform-*d*)  $\delta$  32.4. HRMS (ESI) Calcd for  $\text{C}_{22}\text{H}_{25}\text{N}_2\text{O}_7\text{P}$ :  $[\text{M}] + \text{Na}^+ = 483.1295$ . Found: 483.1309.

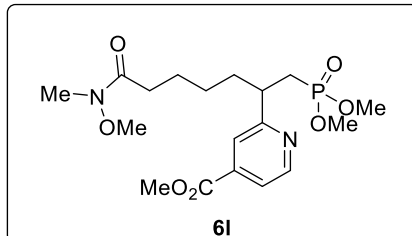

**methyl 2-(1-(dimethoxyphosphoryl)-7-(methoxy(methyl)amino)-7-oxoheptan-2-yl)isonicotinate (6l).**

Purified by flash column chromatography on silica gel (DCM : MeOH = 25 : 1). From *N*-methoxy-*N*-methylhept-6-enamide (34.2 mg, 0.2 mmol), compound **6l** (66.6 mg, 80%) was obtained. Colorless oil.  $^1\text{H}$  NMR (599 MHz, Chloroform-*d*)  $\delta$  8.70 (d,  $J$  = 5.0 Hz, 1H), 7.68 (s, 1H), 7.66 (d,  $J$  = 5.0 Hz, 1H), 3.93 (s, 3H), 3.62 (s, 3H), 3.51 (dd,  $J$  = 17.9, 10.8 Hz, 6H), 3.22 – 3.20 (m, 1H), 3.12 (s, 3H), 2.43 – 2.41 (m, 1H), 2.31 (t,  $J$  = 7.8 Hz, 2H), 2.10 (dd,  $J$  = 4.9, 2.9 Hz, 1H), 1.80 – 1.78 (m, 2H), 1.58 – 1.53 (m, 2H), 1.23 – 1.22 (m, 1H), 1.05 – 1.03 (m, 1H).  $^{13}\text{C}$  NMR (151 MHz, Chloroform-*d*)  $\delta$  174.3, 165.7, 164.3 (d,  $J$  = 6.5 Hz), 150.2, 137.4, 122.5, 120.8, 61.1, 52.6, 52.0 (d,  $J$  = 5.7 Hz), 52.0 (d,  $J$  = 5.9 Hz), 41.8 (d,  $J$  = 3.5 Hz), 36.7 (d,  $J$  = 14.0 Hz), 32.1, 31.6, 29.9 (d,  $J$  = 139.5 Hz), 26.9, 24.3.  $^{31}\text{P}$  NMR (243 MHz, Chloroform-*d*)  $\delta$  32.7. HRMS (ESI) Calcd for  $\text{C}_{18}\text{H}_{29}\text{N}_2\text{O}_7\text{P}$ :  $[\text{M}] + \text{Na}^+ = 439.1605$ . Found: 439.1620.

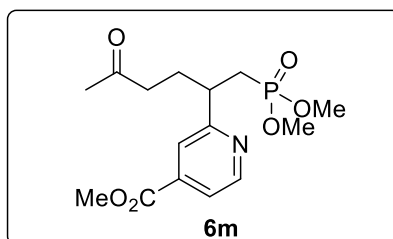

**methyl 2-(1-(dimethoxyphosphoryl)-5-oxohexan-2-yl)isonicotinate (6m).** Purified by flash column chromatography on silica gel (DCM : MeOH = 25 : 1). From hex-5-en-2-one (19.6 mg, 0.2 mmol), compound **6m** (53.5 mg, 78%) was obtained. Colorless oil.  $^1\text{H}$  NMR (599 MHz, Chloroform-*d*)  $\delta$  8.71 (d,  $J = 5.8$  Hz, 1H), 7.69 – 7.69 (m, 2H), 3.94 (s, 3H), 3.55 (d,  $J = 10.9$  Hz, 3H), 3.52 (d,  $J = 10.8$  Hz, 3H), 3.25 – 3.22 (m, 1H), 2.45 – 2.42 (m, 1H), 2.30 – 2.28 (m, 1H), 2.20 – 2.18 (m, 1H), 2.14 – 2.11 (m, 1H), 2.08 – 2.03 (s, 5H).  $^{13}\text{C}$  NMR (151 MHz, Chloroform-*d*)  $\delta$  207.6, 165.6, 163.5 (d,  $J = 7.1$  Hz), 150.3, 137.7, 122.4, 121.0, 52.7, 52.1 (d,  $J = 2.4$  Hz), 52.1 (d,  $J = 2.8$  Hz), 41.1 (d,  $J = 3.4$  Hz), 40.8, 30.5, 30.5 (d,  $J = 14.4$  Hz), 29.8, 29.6.  $^{31}\text{P}$  NMR (243 MHz, Chloroform-*d*)  $\delta$  32.2. HRMS (ESI) Calcd for  $\text{C}_{15}\text{H}_{22}\text{NO}_6\text{P}$ :  $[\text{M}] + \text{Na}^+ = 366.1077$ . Found: 366.1073.

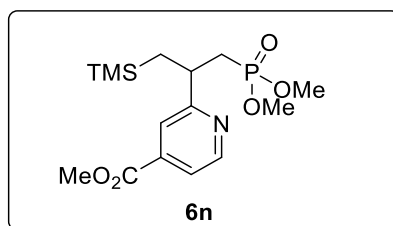

**methyl 2-(1-(dimethoxyphosphoryl)-3-(trimethylsilyl)propan-2-yl)isonicotinate (6n).** Purified by flash column chromatography on silica gel (DCM : MeOH = 25 : 1). From allyltrimethylsilane (22.8 mg, 0.2 mmol), compound **6n** (54.6 mg, 76%) was obtained. Colorless oil.  $^1\text{H}$  NMR (599 MHz, Chloroform-*d*)  $\delta$  8.69 (d,  $J = 5.0$  Hz, 1H), 7.72 (s, 1H), 7.66 (d,  $J = 5.1$  Hz, 1H), 3.94 (s, 3H), 3.51 (dd,  $J = 12.2, 10.9$  Hz, 6H), 3.40 – 3.37 (m, 1H), 2.45 – 2.41 (m, 1H), 2.14 – 2.10 (m, 1H), 1.24 – 1.20 (m, 1H), 1.08 (dd,  $J = 14.6, 5.1$  Hz, 1H), -0.22 (s, 9H).  $^{13}\text{C}$  NMR (151 MHz, Chloroform-*d*)  $\delta$  165.7, 165.7, 150.1, 137.5, 122.0, 120.8, 52.6, 52.0 (d,  $J = 4.1$  Hz), 52.0 (d,  $J = 4.2$  Hz), 38.6 (d,  $J = 3.9$  Hz), 33.8 (d,  $J = 136.7$  Hz), 25.8 (d,  $J = 12.9$  Hz), -1.3.  $^{31}\text{P}$  NMR (243 MHz, Chloroform-*d*)  $\delta$  32.0. HRMS (ESI) Calcd for  $\text{C}_{15}\text{H}_{26}\text{NO}_5\text{PSi}$ :  $[\text{M}] + \text{Na}^+ = 382.1210$ . Found: 382.1232.

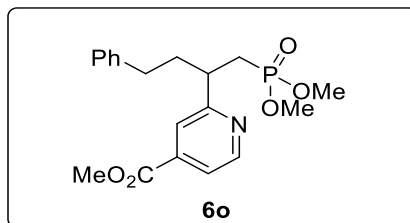

**methyl 2-(1-(dimethoxyphosphoryl)-4-phenylbutan-2-yl)isonicotinate (6o).** Purified by flash column chromatography on silica gel (DCM : MeOH = 25 : 1). From but-3-en-1-ylbenzene (26.4 mg, 0.2 mmol), compound **6o** (61.8 mg, 82%) was obtained. Colorless oil.  $^1\text{H}$  NMR (599 MHz, Chloroform-*d*)  $\delta$  8.75 (d,  $J = 4.9$  Hz, 1H), 7.71 (d,  $J = 4.9$  Hz, 2H), 7.24 (t,  $J = 7.5$  Hz, 2H), 7.15 (t,  $J = 7.4$  Hz, 1H), 7.08 (d,  $J = 7.3$  Hz, 2H), 3.96 (s, 3H), 3.55 (d,  $J = 10.8$  Hz, 3H), 3.50 (d,  $J = 10.8$  Hz, 3H), 3.30 – 3.27 (m, 1H), 2.49 – 2.44 (m, 2H), 2.40 – 2.36 (m, 1H), 2.19 – 2.12 (m, 3H).  $^{13}\text{C}$  NMR (151 MHz, Chloroform-*d*)  $\delta$  165.7, 164.0 (d,  $J = 6.8$  Hz), 150.3, 141.4, 137.5, 128.3, 128.3, 125.9, 122.7, 120.9, 52.7, 52.1 (d,  $J = 3.4$  Hz), 52.0 (d,  $J = 3.6$  Hz), 41.6 (d,  $J = 3.5$  Hz), 38.4 (d,  $J = 13.9$  Hz), 33.4, 30.1 (d,  $J = 139.8$  Hz).  $^{31}\text{P}$  NMR (243 MHz, Chloroform-*d*)  $\delta$  32.5. HRMS (ESI) Calcd for  $\text{C}_{19}\text{H}_{24}\text{NO}_5\text{P}$ :  $[\text{M}] + \text{Na}^+ = 400.1284$ . Found: 400.1301.

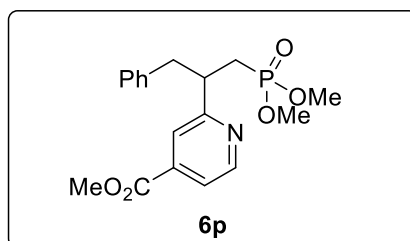

**methyl 2-(1-(dimethoxyphosphoryl)-3-phenylpropan-2-yl)isonicotinate (6p).** Purified by flash column chromatography on silica gel (DCM : MeOH = 25 : 1). From allylbenzene (23.6 mg, 0.2 mmol), compound **6p** (54.5 mg, 75%) was obtained. Colorless oil.  $^1\text{H}$  NMR (599 MHz, Chloroform-*d*)  $\delta$  8.73 (d,  $J = 5.0$  Hz, 1H), 7.66 (dd,  $J = 5.0, 1.6$  Hz, 1H), 7.53 (s, 1H), 7.19 (t,  $J = 7.3$  Hz, 2H), 7.13 (t,  $J = 7.3$  Hz, 1H), 7.01 (d,  $J = 7.1$  Hz, 2H), 3.90 (s, 3H), 3.50 (d,  $J = 10.9$  Hz, 4H), 3.45 (d,  $J = 10.8$  Hz, 3H), 3.06 – 3.03 (m, 2H), 2.54 – 2.47 (m, 1H), 2.18 – 2.12 (m, 1H).  $^{13}\text{C}$  NMR (151 MHz, Chloroform-*d*)  $\delta$  165.6, 163.5 (d,  $J = 5.3$  Hz), 150.0, 138.8, 137.3, 129.1, 128.3, 126.3, 122.8, 120.9, 52.5, 52.0 (d,  $J = 1.6$  Hz), 52.0 (d,  $J = 1.8$  Hz), 43.9 (d,  $J = 3.4$  Hz), 43.2 (d,  $J = 15.5$  Hz), 28.8 (d,  $J = 140.5$  Hz).  $^{31}\text{P}$  NMR (243 MHz, Chloroform-*d*)  $\delta$  32.6. HRMS (ESI) Calcd for  $\text{C}_{18}\text{H}_{22}\text{NO}_5\text{P}$ :  $[\text{M}] + \text{Na}^+ = 386.1128$ . Found: 386.1138.

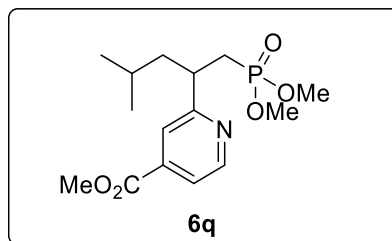

**methyl 2-(1-(dimethoxyphosphoryl)-4-methylpentan-2-yl)isonicotinate (6q).** Purified by flash column chromatography on silica gel (DCM : MeOH = 25 : 1). From 4-methylpent-1-ene (16.8 mg, 0.2 mmol), compound **6q** (48.0 mg, 73%) was obtained. Colorless oil.  $^1\text{H}$  NMR (599 MHz, Chloroform-*d*)  $\delta$  8.71 (d,  $J = 4.9$  Hz, 1H), 7.71 (s, 1H), 7.67 (d,  $J = 4.1$  Hz, 1H), 3.94 (s, 3H), 3.51 (dd,  $J = 20.0, 10.8$  Hz, 6H), 3.32 – 3.31 (m, 1H), 2.41 – 2.38 (m, 1H), 2.10 – 2.04 (m, 1H), 1.75 – 1.73 (m, 1H), 1.55 – 1.54 (m, 1H), 1.25 – 1.22 (m, 1H), 0.90 (d,  $J = 6.6$  Hz, 3H), 0.81 (d,  $J = 6.6$  Hz, 3H).  $^{13}\text{C}$  NMR (151 MHz, Chloroform-*d*)  $\delta$  165.7, 164.6 (d,  $J = 6.1$  Hz), 150.2, 137.5, 122.4, 120.7, 52.6, 52.0 (d,  $J = 5.8$  Hz), 52.0 (d,  $J = 5.8$  Hz), 46.3 (d,  $J = 14.3$  Hz), 39.8 (d,  $J = 3.6$  Hz), 30.3 (d,  $J = 139.3$  Hz), 25.4, 23.1, 21.9.  $^{31}\text{P}$  NMR (243 MHz, Chloroform-*d*)  $\delta$  32.7. HRMS (ESI) Calcd for  $\text{C}_{15}\text{H}_{24}\text{NO}_5\text{P}$ :  $[\text{M}] + \text{Na}^+ = 352.1284$ . Found: 352.1290.

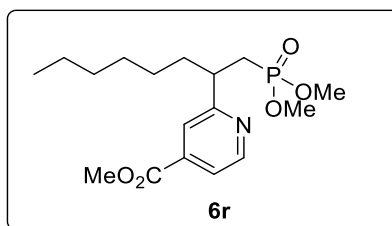

**methyl 2-(1-(dimethoxyphosphoryl)octan-2-yl)isonicotinate (6r).** Purified by flash column chromatography on silica gel (DCM : MeOH = 25 : 1). From oct-1-ene (22.4 mg, 0.2 mmol), compound **6r** (54.3 mg, 76%) was obtained. Colorless oil.  $^1\text{H}$  NMR (400 MHz, Chloroform-*d*)  $\delta$  8.71 (d,  $J = 5.0$  Hz, 1H), 7.69 (s, 1H), 7.67 (d,  $J = 5.0$  Hz, 1H), 3.94 (s, 3H), 3.51 (dd,  $J = 14.7, 10.8$  Hz, 6H), 3.22 – 3.19 (m, 1H), 2.44 – 2.40 (m, 1H), 2.16 – 2.06 (m, 1H), 1.76 – 1.74 (m, 2H), 1.19 – 1.16 (m, 7H), 1.00 – 0.97 (m, 1H), 0.83 – 0.79 (m, 3H).  $^{13}\text{C}$  NMR (101 MHz, Chloroform-*d*)  $\delta$  165.7, 164.5 (d,  $J = 6.2$  Hz), 150.1, 137.4, 122.5, 120.7, 52.6, 52.0 (d,  $J = 3.6$  Hz), 52.0 (d,  $J = 4.0$  Hz), 41.9 (d,  $J = 3.6$  Hz), 37.0 (d,  $J = 14.2$  Hz), 31.5, 29.9 (d,  $J = 139.3$  Hz), 29.0, 27.1, 22.5, 14.0.  $^{31}\text{P}$  NMR (162 MHz, Chloroform-*d*)  $\delta$  33.6. HRMS (ESI) Calcd for  $\text{C}_{17}\text{H}_{28}\text{NO}_5\text{P}$ :  $[\text{M}] + \text{Na}^+ = 380.1597$ . Found: 380.1625.

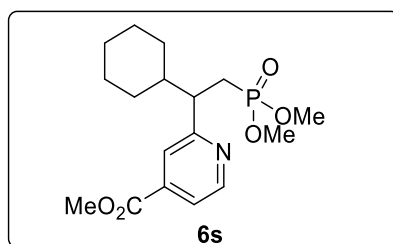

**methyl 2-(1-cyclohexyl-2-(dimethoxyphosphoryl)ethyl)isonicotinate (6s).** Purified by flash column chromatography on silica gel (DCM : MeOH = 25 : 1). From vinylcyclohexane (22.0 mg, 0.2 mmol), compound **6s** (48.5 mg, 68%) was obtained. Colorless oil.  $^1\text{H}$  NMR (599 MHz, Chloroform-*d*)  $\delta$  8.71 (d,  $J = 4.9$  Hz, 1H), 7.68 – 7.67 (m, 2H), 3.94 (s, 3H), 3.47 (d,  $J = 10.8$  Hz, 3H), 3.43 (d,  $J = 10.8$  Hz, 3H), 3.04 – 2.98 (m, 1H), 2.57 – 2.53 (m, 1H), 2.25 – 2.20 (m, 1H), 1.88 (d,  $J = 12.3$  Hz, 1H), 1.73 (d,  $J = 13.8$  Hz, 1H), 1.63 – 1.60 (m, 3H), 1.30 (d,  $J = 12.7$  Hz, 1H), 1.20 (d,  $J = 12.8$  Hz, 1H), 1.09 – 1.06 (m, 2H), 0.93 – 0.91 (m, 1H), 0.85 – 0.83 (m, 1H).  $^{13}\text{C}$  NMR (151 MHz, Chloroform-*d*)  $\delta$  165.8, 163.6 (d,  $J = 2.9$  Hz), 149.8, 137.1, 123.5, 120.6, 52.6, 52.0 (d,  $J = 6.3$  Hz), 52.0 (d,  $J = 6.7$  Hz), 47.6 (d,  $J = 4.0$  Hz), 43.4 (d,  $J = 15.7$  Hz), 30.6 (d,  $J = 3.3$  Hz), 26.5 (d,  $J = 139.9$  Hz), 26.3, 26.2.  $^{31}\text{P}$  NMR (243 MHz, Chloroform-*d*)  $\delta$  34.0. HRMS (ESI) Calcd for  $\text{C}_{17}\text{H}_{26}\text{NO}_5\text{P}$ :  $[\text{M}] + \text{Na}^+ = 378.1441$ . Found: 378.1441.

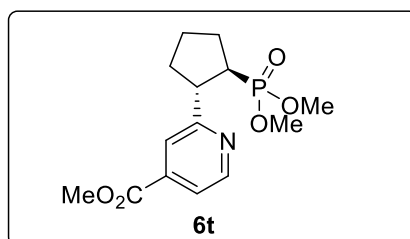

**methyl 2-((1S,2R)-2-(dimethoxyphosphoryl)cyclopentyl)isonicotinate (6t).** Purified by flash column chromatography on silica gel (DCM : MeOH = 25 : 1). From cyclopentene (13.6 mg, 0.2 mmol), compound **6t** (46.6 mg, 75%) was obtained. Colorless oil.  $^1\text{H}$  NMR (599 MHz, Chloroform-*d*)  $\delta$  8.69 (d,  $J = 5.0$  Hz, 1H), 7.75 (s, 1H), 7.66 (d,  $J = 5.0$  Hz, 1H), 3.94 (s, 3H), 3.58 – 3.50 (m, 7H), 2.90 – 2.86 (m, 1H), 2.17 – 2.15 (m, 2H), 2.07 – 2.04 (m, 1H), 1.92 – 1.89 (m, 1H), 1.85 – 1.82 (m, 2H).  $^{13}\text{C}$  NMR (151 MHz, Chloroform-*d*)  $\delta$  165.8, 164.4 (d,  $J = 2.7$  Hz), 150.1, 137.5, 122.3, 120.7, 52.6, 52.3 (d,  $J = 6.4$  Hz), 52.2 (d,  $J = 6.9$  Hz), 48.7, 40.3 (d,  $J = 144.9$  Hz), 36.0,  $J = 13.0$  Hz), 27.7, 26.2 (d,  $J = 10.8$  Hz).  $^{31}\text{P}$  NMR (243 MHz, Chloroform-*d*)  $\delta$  36.3. MS (ESI) Calcd for  $\text{C}_{14}\text{H}_{20}\text{NO}_5\text{P}$ :  $[\text{M}] + \text{Na}^+ = 336.0971$ . Found: 336.0992.



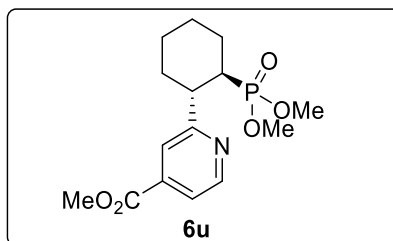

**methyl 2-((1S,2R)-2-(dimethoxyphosphoryl)cyclohexyl)isonicotinate (6u)**. Purified by flash column chromatography on silica gel (DCM : MeOH = 25 : 1). From cyclohexene (16.4 mg, 0.2 mmol), compound **6u** (46.9 mg, 77%) was obtained. Colorless oil.  $^1\text{H}$  NMR (599 MHz, Chloroform-*d*)  $\delta$  8.68 (d,  $J = 5.0$  Hz, 1H), 7.71 (s, 1H), 7.65 (d,  $J = 5.0$  Hz, 1H), 3.92 (s, 3H), 3.41 (d,  $J = 10.6$  Hz, 3H), 3.34 (d,  $J = 10.6$  Hz, 3H), 2.99 – 2.97 (m, 1H), 2.49 – 2.46 (m, 1H), 2.19 – 2.17 (m, 1H), 1.84 – 1.81 (m, 3H), 1.66 – 1.63 (m, 1H), 1.58 – 1.56 (m, 1H), 1.40 – 1.36 (m, 2H).  $^{13}\text{C}$  NMR (151 MHz, Chloroform-*d*)  $\delta$  165.8, 165.5 (d,  $J = 2.1$  Hz), 149.7, 137.5, 122.1, 120.5, 52.5, 52.2 (d,  $J = 6.4$  Hz), 51.7 (d,  $J = 7.4$  Hz), 46.0 (d,  $J = 4.1$  Hz), 38.3 (d,  $J = 139.3$  Hz), 34.2 (d,  $J = 15.0$  Hz), 26.1 (d,  $J = 4.6$  Hz), 25.6, 25.5 (d,  $J = 15.7$  Hz).  $^{31}\text{P}$  NMR (243 MHz, Chloroform-*d*)  $\delta$  33.8. MS (ESI) Calcd for  $\text{C}_{15}\text{H}_{22}\text{NO}_5\text{P}$ :  $[\text{M}] + \text{Na}^+ = 350.1128$ . Found: 350.1128.

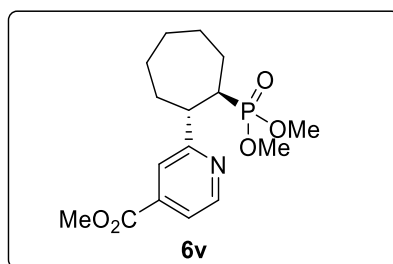

**methyl 2-((1S,2R)-2-(dimethoxyphosphoryl)cycloheptyl)isonicotinate (6v)**. Purified by flash column chromatography on silica gel (DCM : MeOH = 25 : 1). From cycloheptene (19.2 mg, 0.2 mmol), compound **6v** (53.1 mg, 78%) was obtained. Colorless oil.  $^1\text{H}$  NMR (599 MHz, Chloroform-*d*)  $\delta$  8.67 (d,  $J = 5.0$  Hz, 1H), 7.71 (s, 1H), 7.64 (d,  $J = 5.0$  Hz, 1H), 3.94 (s, 3H), 3.48 (d,  $J = 10.6$  Hz, 3H), 3.44 – 3.41 (m, 1H), 3.37 (d,  $J = 10.7$  Hz, 3H), 3.08 – 3.05 (m, 1H), 2.17 – 2.14 (m, 1H), 1.90 – 1.87 (m, 2H), 1.71 – 1.70 (m, 1H), 1.64 – 1.60 (m, 1H), 1.53 – 1.48 (m, 2H).  $^{13}\text{C}$  NMR (151 MHz, Chloroform-*d*)  $\delta$  166.8 (d,  $J = 1.5$  Hz), 165.8, 149.4, 137.6, 122.1, 120.2, 52.6, 52.3 (d,  $J = 6.4$  Hz), 51.9 (d,  $J = 7.4$  Hz), 46.6 (d,  $J = 2.2$  Hz), 39.0 (d,  $J = 134.5$  Hz), 35.1 (d,  $J = 15.1$  Hz), 30.1, 28.3 (d,  $J = 13.1$  Hz), 26.2 (d,  $J = 3.8$  Hz), 25.6.  $^{31}\text{P}$  NMR (243 MHz, Chloroform-*d*)  $\delta$  37.1. MS (ESI) Calcd for  $\text{C}_{16}\text{H}_{24}\text{NO}_5\text{P}$ :  $[\text{M}] + \text{Na}^+ = 364.1284$ . Found: 364.1311.

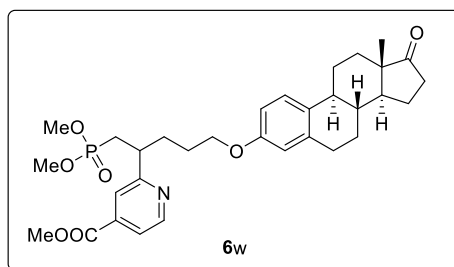

**methyl 2-(1-(dimethoxyphosphoryl)-5-(((8R,9S,13S,14S)-13-methyl-17-oxo-7,8,9,11,12,13,14,15,16,17-decahydro-6H-cyclopenta[a]phenanthren-3-yl)oxy)pentan-2-yl)isonicotinate (6w)**. Purified by flash column chromatography on silica gel (DCM : MeOH = 25 : 1). From (8R,9S,13S,14S)-13-methyl-3-(pent-4-en-1-yloxy)-6,7,8,9,11,12,13,14,15,16-decahydro-17H-cyclopenta[a]phenanthren-17-one (67.6 mg, 0.2 mmol), compound **6w** (84.4 mg, 73%) was obtained. White solid.  $^1\text{H}$  NMR (599 MHz, Chloroform-*d*)  $\delta$  8.73 (d,  $J = 5.0$  Hz, 1H), 7.74 (s, 1H), 7.70 (d,  $J = 5.0$  Hz, 1H), 7.16 (d,  $J = 8.6$  Hz, 1H), 6.64 (d,  $J = 8.6$  Hz, 1H), 6.58 (s, 1H), 3.95 (s, 3H), 3.85 (t,  $J = 6.6$  Hz, 2H), 3.56 (d,  $J = 10.8$  Hz, 3H), 3.52 (d,  $J = 10.9$  Hz, 3H), 3.31 – 3.30 (m, 1H), 2.86 – 2.85 (m, 2H), 2.50 – 2.47 (m, 2H), 2.37 (d,  $J = 10.0$  Hz, 1H), 2.23 (t,  $J = 9.2$  Hz, 1H), 2.15 – 2.13 (m, 2H), 2.06 – 2.04 (m, 1H), 1.97 – 1.95 (m, 4H), 1.68 – 1.65 (m, 1H), 1.62 – 1.58 (m, 2H), 1.51 – 1.48 (m, 5H), 0.90 (s, 3H).  $^{13}\text{C}$  NMR (151 MHz, Chloroform-*d*)  $\delta$  220.8, 165.6, 164.0 (d,  $J = 6.8$  Hz), 156.8, 150.3, 137.6, 137.5, 131.9, 126.2, 122.6, 120.9, 114.4, 112.0, 67.4, 52.6, 52.1 (d,  $J = 6.1$  Hz), 52.0 (d,  $J = 6.4$  Hz), 50.4, 48.0, 43.9, 41.7 (d,  $J = 3.4$  Hz), 38.3, 35.8, 33.4 (d,  $J = 14.2$  Hz), 31.5, 30.1 (d,  $J = 139.7$  Hz), 29.6, 27.0, 26.5, 25.9, 21.5, 13.8.  $^{31}\text{P}$  NMR (243 MHz, Chloroform-*d*)  $\delta$  32.5. MS (ESI) Calcd for  $\text{C}_{32}\text{H}_{42}\text{NO}_7\text{P}$ :  $[\text{M}] + \text{Na}^+ = 606.2591$ . Found: 606.2593.

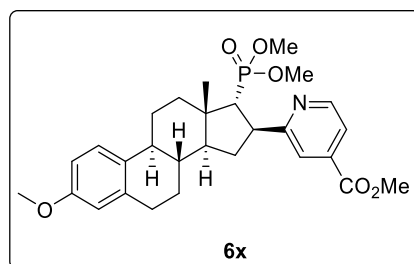

**Methyl 2-(((8R,9S,13S,14S,16R,17R)-17-(dimethoxyphosphoryl)-3-methoxy-13-methyl-7,8,9,11,12,13,14,15,16,17-decahydro-6H-cyclopenta[a]phenanthren-16-yl)oxy)ethyl isonicotinate (6x)**. Purified by flash column chromatography on silica gel (DCM : MeOH = 25 : 1). From (8S,9S,13R,14S)-3-methoxy-13-methyl-7,8,9,11,12,13,14,15-octahydro-6H-cyclopenta[a]phenanthrene (53.6 mg, 0.2 mmol), compound **6x** (40.5 mg, 40%) was obtained. White solid.  $^1\text{H}$  NMR (599 MHz, Chloroform-*d*)  $\delta$  8.70 (d,  $J = 5.0$  Hz, 1H), 7.80 (s, 1H), 7.67 (dd,  $J = 5.0, 1.5$  Hz, 1H), 7.22 (d,  $J = 8.6$  Hz, 1H), 6.72

(dd,  $J = 8.6, 2.8$  Hz, 1H), 6.63 (d,  $J = 2.7$  Hz, 1H), 3.97 (s, 3H), 3.78 – 3.76 (m, 4H), 3.65 (dd,  $J = 23.8, 10.6$  Hz, 6H), 2.85 (t,  $J = 4.9$  Hz, 2H), 2.76 (dd,  $J = 19.6, 6.2$  Hz, 1H), 2.37 – 2.34 (m, 3H), 2.16 – 2.13 (m, 1H), 2.04 – 2.01 (m, 1H), 1.93 – 1.90 (m, 2H), 1.78 – 1.76 (m, 1H), 1.60 – 1.57 (m, 1H), 1.52 – 1.49 (m, 2H), 1.14 (d,  $J = 3.2$  Hz, 3H).  $^{13}\text{C}$  NMR (151 MHz, Chloroform-*d*)  $\delta$  165.9, 164.7 (d,  $J = 5.6$  Hz), 157.5, 150.1, 137.9, 137.5, 132.7, 126.3, 122.2, 120.5, 113.7, 111.5, 55.2, 52.8, 52.7, 52.1 (d,  $J = 2.8$  Hz), 52.1 (d,  $J = 2.2$  Hz), 50.4 (d,  $J = 137.7$  Hz), 46.7, 44.3, 43.0, 38.6, 35.8 (d,  $J = 5.2$  Hz), 34.9 (d,  $J = 5.4$  Hz), 29.8, 28.0, 26.8, 21.7 (d,  $J = 17.4$  Hz).  $^{31}\text{P}$  NMR (243 MHz, Chloroform-*d*)  $\delta$  34.9. MS (ESI) Calcd for  $\text{C}_{28}\text{H}_{36}\text{NO}_6\text{P}$ :  $[\text{M}] + \text{Na}^+ = 536.2172$ . Found: 536.2171.

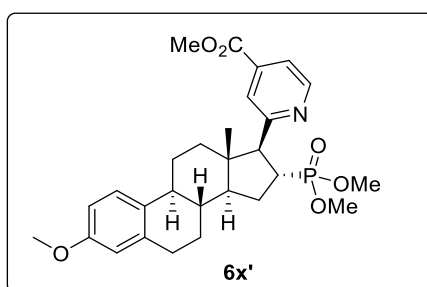

**methy1**            **2-((8S,9S,13S,14S,16R,17S)-16-(dimethoxyphosphoryl)-3-methoxy-13-methyl-7,8,9,11,12,13,14,15,16,17-decahydro-6H-cyclopenta[a]phenanthren-17-yl)isonicotinate (6x')**. Purified by flash column chromatography on silica gel (DCM : MeOH = 25 : 1). From (8S,9S,13R,14S)-3-methoxy-13-methyl-7,8,9,11,12,13,14,15-octahydro-6H-cyclopenta[a]phenanthrene (53.6 mg, 0.2 mmol), compound **6x'** (21.4 mg, 21%) was obtained. White solid.  $^1\text{H}$  NMR (599 MHz, Chloroform-*d*)  $\delta$  8.72 (d,  $J = 4.9$  Hz, 1H), 7.71 – 7.69 (m, 2H), 7.18 (d,  $J = 8.6$  Hz, 1H), 6.70 (dd,  $J = 8.6, 2.7$  Hz, 1H), 6.64 (d,  $J = 2.7$  Hz, 1H), 3.98 (s, 3H), 3.78 (s, 3H), 3.67 – 3.63 (m, 1H), 3.57 (d,  $J = 10.5$  Hz, 3H), 3.51 (d,  $J = 10.5$  Hz, 3H), 3.29 (dd,  $J = 19.8, 10.1$  Hz, 1H), 2.89 – 2.87 (m, 2H), 2.29 (dd,  $J = 23.5, 8.6$  Hz, 3H), 1.95 – 1.93 (m, 1H), 1.84 – 1.78 (m, 2H), 1.69 – 1.66 (m, 2H), 1.50 – 1.49 (m, 2H), 1.42 – 1.39 (m, 1H), 0.49 (s, 3H).  $^{13}\text{C}$  NMR (151 MHz, Chloroform-*d*)  $\delta$  165.9, 159.9, 157.5, 149.3, 137.9, 137.1, 132.3, 126.2, 123.0, 120.7, 113.8, 111.5, 59.3, 55.2, 54.3 (d,  $J = 3.3$  Hz), 52.7, 52.4 (d,  $J = 6.3$  Hz), 52.3 (d,  $J = 6.7$  Hz), 46.4 (d,  $J = 11.5$  Hz), 43.5, 38.8, 37.7, 33.3 (d,  $J = 143.8$  Hz), 29.8, 27.6, 26.6, 26.2, 13.4.  $^{31}\text{P}$  NMR (243 MHz, Chloroform-*d*)  $\delta$  32.5. MS (ESI) Calcd for  $\text{C}_{28}\text{H}_{36}\text{NO}_6\text{P}$ :  $[\text{M}] + \text{Na}^+ = 536.2172$ . Found: 536.2198.

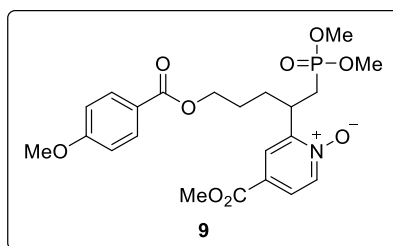

**2-(1-(dimethoxyphosphoryl)-5-((4-methoxybenzoyl)oxy)pentan-2-yl)-4-**

**(methoxycarbonyl)pyridine 1-oxide (9).** Purified by flash column chromatography on silica gel (DCM : MeOH = 20 : 1). From 4-methoxyphenyl hex-5-enoate (44.0 mg, 0.2 mmol), compound **9** (7.7 mg, 8%) was obtained. Colorless oil.  $^1\text{H}$  NMR (599 MHz, Chloroform-*d*)  $\delta$  8.23 (d,  $J$  = 6.8 Hz, 1H), 7.98 (d,  $J$  = 7.1 Hz, 2H), 7.88 (s, 1H), 7.77 (d,  $J$  = 6.9 Hz, 1H), 6.92 (d,  $J$  = 7.1 Hz, 2H), 4.27 (t,  $J$  = 6.2 Hz, 2H), 3.93 (s, 3H), 3.86 (s, 3H), 3.76 – 3.71 (m, 1H), 3.63 (dd,  $J$  = 10.9, 1.8 Hz, 6H), 2.26 – 2.19 (m, 2H), 2.10 – 2.06 (m, 1H), 1.76 – 1.70 (m, 2H), 1.62 – 1.60 (m, 1H).  $^{13}\text{C}$  NMR (151 MHz, Chloroform-*d*)  $\delta$  168.7 (d,  $J$  = 9.2 Hz), 166.2, 164.1, 163.3, 152.5, 140.2, 131.6, 125.9, 124.1, 122.6, 113.6, 64.0, 55.4, 52.7, 52.4 (d,  $J$  = 6.5 Hz), 52.3 (d,  $J$  = 6.6 Hz), 36.0, 28.7, 26.8, 25.9.  $^{31}\text{P}$  NMR (243 MHz, Chloroform-*d*)  $\delta$  31.3. MS (ESI) Calcd for  $\text{C}_{22}\text{H}_{28}\text{NO}_9\text{P}$ :  $[\text{M}] + \text{Na}^+ = 504.1394$ . Found: 504.1394.

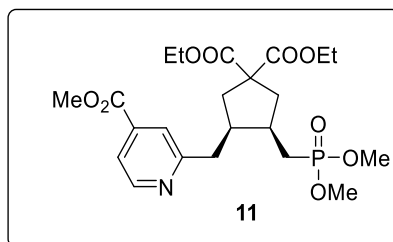

**diethyl (3R,4R)-3-((dimethoxyphosphoryl)methyl)-4-((4-(methoxycarbonyl)pyridin-2-yl)methyl)cyclopentane-1,1-dicarboxylate (11).** Purified by flash column chromatography on silica gel (DCM : MeOH = 25 : 1). From diethyl 2,2-diallylmalonate (48.0 mg, 0.2 mmol), compound **11** (61.9 mg, 64%) (cis/trans > 10:1) was obtained. Colorless oil.  $^1\text{H}$  NMR (599 MHz, Chloroform-*d*)  $\delta$  8.65 (d,  $J$  = 5.0 Hz, 1H), 7.69 (s, 1H), 7.65 (d,  $J$  = 5.0 Hz, 1H), 4.21 – 4.12 (m, 4H), 3.93 (s, 3H), 3.73 (dd,  $J$  = 10.8, 8.9 Hz, 6H), 2.95 – 2.90 (m, 1H), 2.66 – 2.64 (m, 2H), 2.55 – 2.53 (m, 1H), 2.49 – 2.46 (m, 1H), 2.30 – 2.27 (m, 2H), 2.03 – 2.01 (m, 2H), 1.79 – 1.77 (m, 1H), 1.21 (dt,  $J$  = 19.1, 7.1 Hz, 6H).  $^{13}\text{C}$  NMR (151 MHz, Chloroform-*d*)  $\delta$  172.7, 172.3, 165.7, 161.7, 150.1, 137.6, 122.5, 120.4, 61.6, 61.7, 58.5, 52.6, 52.4 (d,  $J$  = 6.7 Hz), 52.2 (d,  $J$  = 6.7 Hz), 43.0 (d,  $J$  = 13.7 Hz), 39.1 (d,  $J$  = 6.0 Hz), 37.7, 37.4, 36.7 (d,  $J$  = 4.6 Hz), 24.8 (d,  $J$  = 141.0 Hz), 14.0, 14.0.  $^{31}\text{P}$  NMR (243 MHz, Chloroform-*d*)  $\delta$  33.8. MS (ESI) Calcd for  $\text{C}_{22}\text{H}_{32}\text{NO}_9\text{P}$ :  $[\text{M}] + \text{Na}^+ = 508.1707$ . Found: 508.1783.

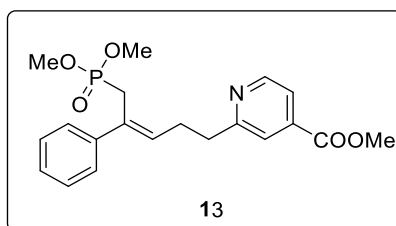

**methyl (Z)-2-(5-(dimethoxyphosphoryl)-4-phenylpent-3-en-1-yl)isonicotinate (13).** Purified by flash column chromatography on silica gel (DCM : MeOH = 25 : 1). From (1-cyclopropylvinyl)benzene (28.8 mg, 0.2 mmol), compound **13** (36.4 mg, 47%) was obtained. Colorless oil. <sup>1</sup>H NMR (599 MHz, Chloroform-*d*) δ 8.69 (d, *J* = 5.1 Hz, 1H), 7.74 (s, 1H), 7.67 (d, *J* = 4.6 Hz, 1H), 7.36 (d, *J* = 6.8 Hz, 2H), 7.30 (t, *J* = 7.7 Hz, 2H), 7.23 (t, *J* = 7.3 Hz, 1H), 5.90 (q, *J* = 7.0 Hz, 1H), 3.94 (s, 3H), 3.55 (d, *J* = 10.9 Hz, 6H), 3.09 (s, 1H), 3.06 – 3.03 (m, 3H), 2.75 – 2.73 (m, 2H). <sup>13</sup>C NMR (151 MHz, Chloroform-*d*) δ 165.8, 162.4, 150.1, 142.3, 137.6, 131.8 (d, *J* = 11.9 Hz), 130.7 (d, *J* = 11.4 Hz), 128.3, 127.1, 126.5, 122.1, 120.4, 52.6, 52.5 (d, *J* = 6.8 Hz), 37.7 (d, *J* = 3.4 Hz), 29.2 (d, *J* = 3.2 Hz), 28.2 (d, *J* = 139.1 Hz). <sup>31</sup>P NMR (243 MHz, Chloroform-*d*) δ 29.2. MS (ESI) Calcd for C<sub>20</sub>H<sub>24</sub>NO<sub>5</sub>P: [M] + Na<sup>+</sup> = 412.1284. Found: 412.1292.

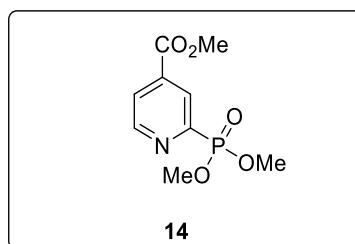

**methyl 2-(dimethoxyphosphoryl)isonicotinate (14).** Purified by flash column chromatography on silica gel (DCM : MeOH = 30 : 1). From 1-methoxy-4-(methoxycarbonyl)pyridin-1-ium methyl sulfate (55.8 mg, 0.2 mmol), compound **14** (10.8 mg, 22%) was obtained. Colorless oil. <sup>1</sup>H NMR (599 MHz, Chloroform-*d*) δ 8.97 (d, *J* = 4.7 Hz, 1H), 8.48 (d, *J* = 6.9 Hz, 1H), 8.00 (d, *J* = 4.9 Hz, 1H), 3.98 (s, 3H), 3.90 (dd, *J* = 11.0, 1.4 Hz, 6H). <sup>13</sup>C NMR (151 MHz, Chloroform-*d*) δ 164.7 (d, *J* = 3.3 Hz), 152.4 (d, *J* = 230.2 Hz), 151.4 (d, *J* = 23.2 Hz), 137.7 (d, *J* = 13.0 Hz), 127.2 (d, *J* = 26.3 Hz), 125.3 (d, *J* = 4.0 Hz), 53.7, 53.6, 53.0. <sup>31</sup>P NMR (243 MHz, Chloroform-*d*) δ 16.0. MS (ESI) Calcd for C<sub>9</sub>H<sub>12</sub>NO<sub>5</sub>P: [M] + Na<sup>+</sup> = 268.0345. Found: 268.0345.

## VI. Computational Details

### Computational details

All calculations were conducted using DFT<sup>1</sup> as implemented in the Jaguar 9.1 suite<sup>2</sup> of ab initio quantum chemistry programs with Minnesota functional M06 including Grimme's D3 dispersion correction levels of theory.<sup>3,4</sup> Geometry optimizations were proceeded using the 6-31G\*\* basis set. The energies of the optimized structures were reevaluated by additional single point calculations on each optimized geometry using M06 including Grimme's D3 dispersion correction and Dunning's correlation consistent triple- $\zeta$  basis set cc-pVTZ(-f)<sup>5</sup> which includes a double set of polarization functions. Analytical vibrational frequencies within the harmonic approximation were calculated using the 6-31G\*\* basis to confirm proper convergence to well-defined minima or saddle points on the potential energy surface. At last, solvation energies were calculated using a self-consistent reaction field (SCRF)<sup>6-8</sup> approach based on accurate numerical solutions of the Poisson-Boltzmann equation and were performed with the 6-31G\*\* basis at the optimized gas phase geometry with the dielectric constant of  $\epsilon = 37.5$  for acetonitrile. As is the case for all continuum models, the solvation energies are subject to empirical parametrization of the atomic radii that are used to generate the solute surface. The standard set of optimized radii in Jaguar was used for H (1.150 Å), C (1.900 Å), N (1.600Å), O (1.600Å), and P (2.074 Å).<sup>9</sup> The Gibbs free energies in solution phase  $G(\text{sol})$  were computed with the following protocol.

$$G(\text{sol}) = G(\text{gas}) + G^{\text{solv}} \quad (1)$$

$$G(\text{gas}) = H(\text{gas}) - TS(\text{gas}) \quad (2)$$

$$H(\text{gas}) = E(\text{SCF}) + \text{ZPE} \quad (3)$$

$$\Delta E(\text{SCF}) = \Sigma E(\text{SCF}) \text{ for products} - \Sigma E(\text{SCF}) \text{ for reactants} \quad (4)$$

$$\Delta G(\text{sol}) = \Sigma G(\text{sol}) \text{ for products} - \Sigma G(\text{sol}) \text{ for reactants} \quad (5)$$

$G(\text{gas})$  is the free energy in gas phase;  $G^{\text{solv}}$  is the free energy of solvation;  $H(\text{gas})$  is the enthalpy in gas phase;  $T$  is the temperature (298.15K);  $S(\text{gas})$  is the entropy in gas phase;  $E(\text{SCF})$  is "raw" electronic energy as computed from the SCF procedure which is the self-consistent field energy, and ZPE is the zero point energy. The entropy we refer is specifically vibrational/rotational/translational entropy of the solute(s), and the entropy of the solvent is implicitly comprised in the continuum solvation model.

## Fragment analysis of A1-TS and A1'-TS

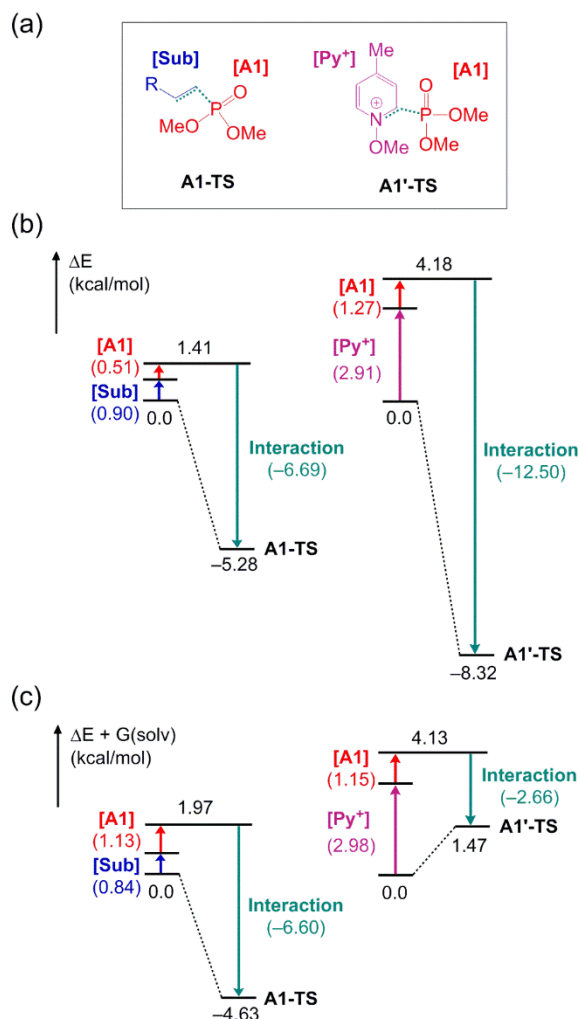

**Figure S1.** (a) Separating transition states into two fragments and nomination of them. (b) Fragment analysis using only electronic energy. (c) Fragment analysis after solvation correction.

Starting from the reactant states **A1**, the terminal alkene and pyridinium substrates, we calculated the energies required to distort the structures of these reactants to what is found in the transition states and labeled them as **[A1]**, **[Sub]**, and **[Py<sup>+</sup>]**, respectively. Next, these distorted fragments were assembled into the transition states **A1-TS** and **A1'-TS**, allowing for the interaction energies to be calculated. Considering only the electronic energies, the terminal alkene and **A1** substrates undergo structural distortions that are worth only 0.9 and 0.5 kcal/mol, respectively. The interaction energy is -6.7 kcal/mol for **A1-TS**. These energies are easy to understand considering that the C-P bond is formed by a radical

attack on a fairly localized  $\pi$ -orbital, which should cause only minimal structural change.

A much more pronounced electronic change is needed to engage pyridinium, as the initially delocalized and aromatic  $\pi$ -orbital must be forced to localize and match the localized phosphonyl radical **A1**. Our calculations suggest structural distortion energies of 2.9 and 1.3 kcal/mol in **[Py<sup>+</sup>]** and **[A1]**, respectively. The fragment interaction energy in **A1'-TS** is found to be  $-12.5$  kcal/mol. As shown in Figure 4, the optimized P–C distances in **A1-TS** and **A1'-TS** are 2.72 and 2.59 Å, respectively, in good agreement with the much stronger interaction energy in **A1'-TS** over that of **A1-TS**. These computed results are internally consistent and easy to understand, given the localized vs. delocalized nature of the  $\pi$ -orbitals in the alkene and pyridinium substrates, respectively. When solvation energy was considered as illustrated in (c), the interaction energy of **A1'-TS** was significantly changed to  $-2.7$  kcal/mol, whereas the interaction energy in **A1-TS** is nearly same. The reason of this critical role of solvation energy is written in main text.

### Computationally calculated isosurface plots

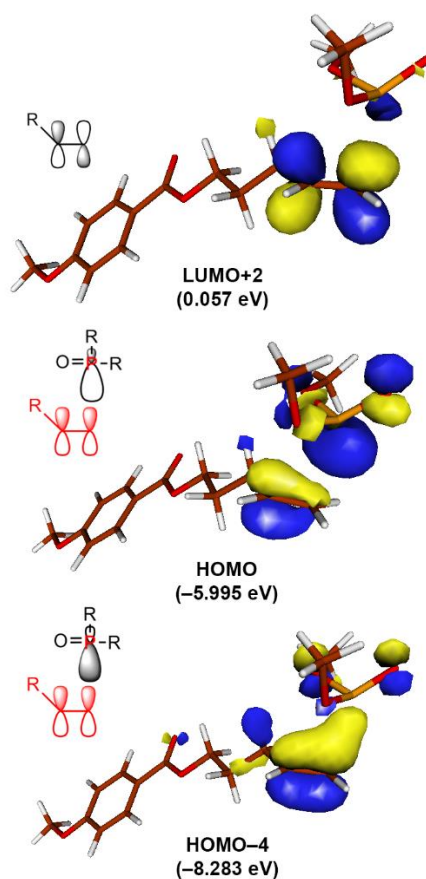

**Figure S2.** Isosurface plots of **A1-TS** (isodensity value = 0.05).



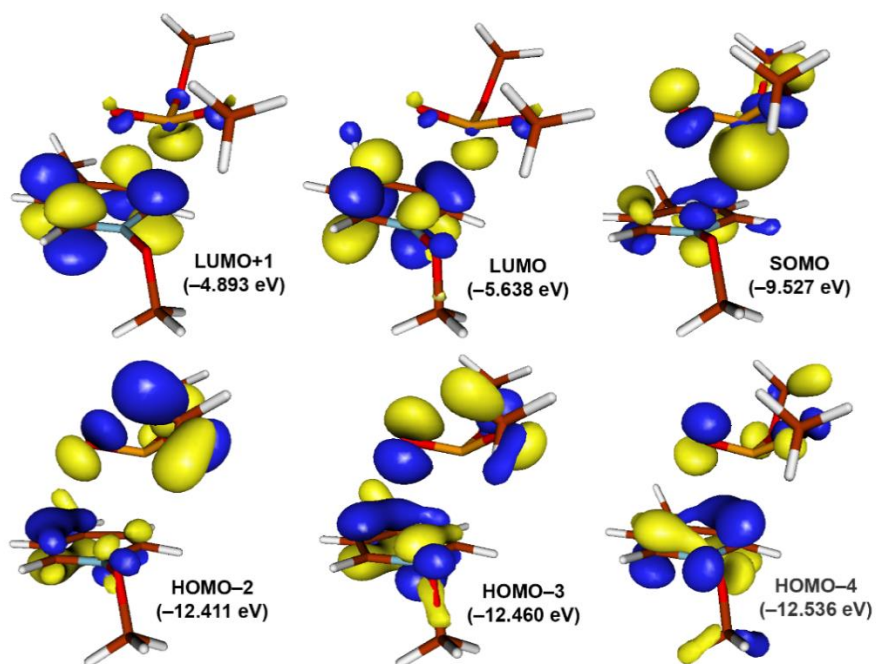

**Figure S3.** Isosurface plots of A1'-TS (isodensity value = 0.05).

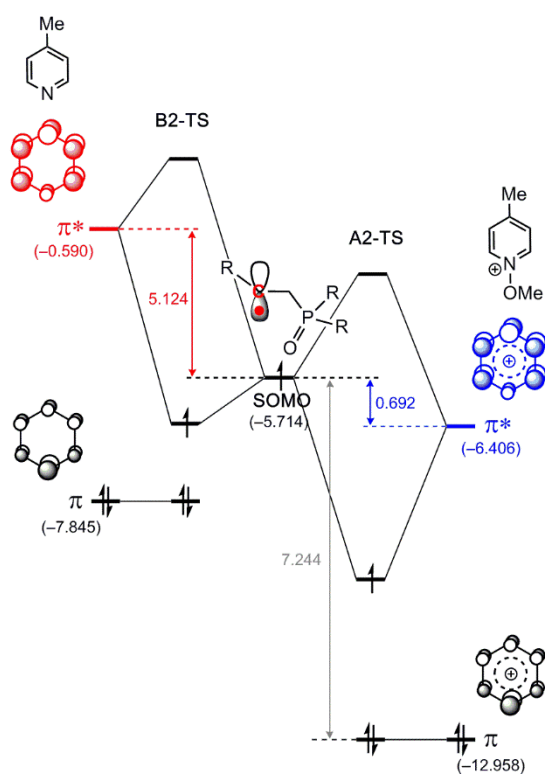

**Figure S4.** Qualitative MO diagram of radical interaction between alkyl radical A2 and pyridinium (Energies are given in eV).

Similar to phosphonyl radical **A1**, transient alkyl radical intermediate **A2** will act as a nucleophile to interact with pyridine or pyridinium at first as mentioned in main text. Highly located LUMO energy of pyridine analogue is in good agreement with energy difference between **A2-TS** and **B2-TS** described in Figure 1.

### Computational study of diverse pathway after C–C bond formation

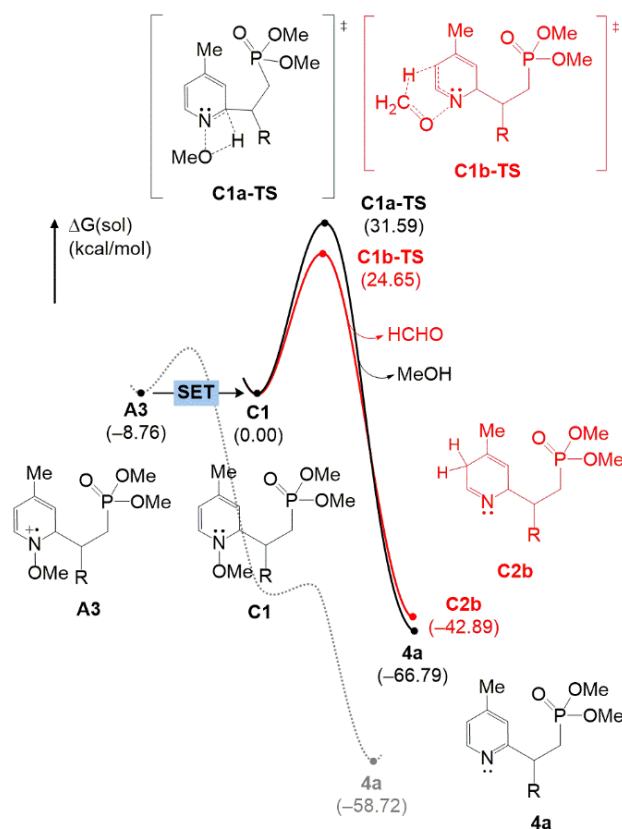

**Figure S5.** Other reaction pathways after formation of **A3** intermediate.

There is also a probability that a single electron transfer occurs in **A3**, and the associated energy profile is shown above. After being reduced of **A3**, it is impossible to be charge-separated by deprotonation due to the electroneutrality of **C1**. Instead, two different types of decomposition *via* metathesis, **C1a-TS** and **C1b-TS** could occur. Two metathesis reactions showed 31.6 and 24.7 kcal/mol of activation barrier respectively. Although the generation of aromaticity of products compensates the energy barriers of transition states, their values are quite high due to high structural strain in the structures of transition states. Therefore **C1** is hard to proceed to the next reactions. Deprotonation on **A3**, on the other hand, with acetate from  $\text{Mn}(\text{OAc})_3$ , occurs almost immediately. Thus it is reasonable that intermolecular deprotonation occurs dominantly and irreversibly. After deprotonation,

electroneutral radical intermediate **A4** undergoes barrierless homolytic cleavage to finally make a product **4a**.

**Table S3. Computed energy components for optimized structures**

|                            | <b>E(SCF)/(eV)</b>   | <b>ZPE/(kcal/mol)</b> | <b>S(gas)/(cal/mol)</b> | <b>G(soln)/(kcal/mol)</b> |
|----------------------------|----------------------|-----------------------|-------------------------|---------------------------|
|                            | cc-pVTZ(-f)/LACV3P** | 6-31G**/LACVP**       | 6-31G**/LACVP**         | 6-31G**/LACVP**           |
| <b>Terminal Alkene</b>     | -19875.195           | 166.616               | 135.583                 | -9.86                     |
| <b>N-methoxypyridinium</b> | -10946.475           | 100.479               | 88.162                  | -52.56                    |
| <b>AcOH</b>                | -6232.411            | 38.976                | 68.687                  | -9.02                     |
| <b>AcO</b>                 | -6216.767            | 30.254                | 69.238                  | -74.82                    |
| <b>•OMe</b>                | -3129.780            | 22.698                | 56.682                  | -3.86                     |
| <b>4-methylpyridine</b>    | -7822.261            | 70.384                | 73.212                  | -6.26                     |
| <b>3a</b>                  | -17617.703           | 63.108                | 87.433                  | -11.31                    |
| <b>A1</b>                  | -17599.928           | 56.027                | 90.895                  | -9.07                     |
| <b>A1-TS</b>               | -37475.352           | 222.957               | 183.185                 | -18.28                    |
| <b>A2</b>                  | -37476.540           | 224.315               | 179.767                 | -17.42                    |
| <b>A2-TS</b>               | -48423.754           | 326.198               | 224.130                 | -50.61                    |
| <b>A3</b>                  | -48424.250           | 327.927               | 216.796                 | -53.07                    |
| <b>A4</b>                  | -48413.910           | 319.437               | 215.679                 | -20.21                    |
| <b>A4-TS</b>               | -48413.887           | 318.567               | 211.958                 | -20.51                    |

|                        |            |         |         |        |
|------------------------|------------|---------|---------|--------|
| <b>4a</b>              | -45284.625 | 293.881 | 191.185 | -19.51 |
| <b>A1'-TS</b>          | -28546.764 | 156.793 | 145.486 | -51.84 |
| <b>A5</b>              | -28547.313 | 155.123 | 135.384 | -53.28 |
| <b>A6</b>              | -28537.238 | 149.721 | 140.329 | -12.46 |
| <b>A2'-TS</b>          | -55093.965 | 286.169 | 226.167 | -27.35 |
| <b>5a</b>              | -37494.492 | 233.224 | 177.523 | -18.36 |
| <b>B1-TS</b>           | -25422.234 | 128.718 | 131.393 | -12.68 |
| <b>B2</b>              | -25422.889 | 129.651 | 124.595 | -12.55 |
| <b>B2-TS</b>           | -45298.703 | 298.214 | 209.912 | -18.86 |
| <b>B3</b>              | -45299.367 | 298.923 | 193.862 | -18.94 |
| <b>[A1] for A1-TS</b>  | -17599.906 | -       | -       | -8.45  |
| <b>[Sub] for A1-TS</b> | -19875.156 | -       | -       | -9.92  |
| <b>[A1] for A1'-TS</b> | -17599.873 | -       | -       | -9.19  |
| <b>[Py] for A1'-TS</b> | -10946.349 | -       | -       | -52.49 |
| <b>[A1] for B1-TS</b>  | -17599.916 | -       | -       | -8.61  |
| <b>[Py] for B1-TS</b>  | -7822.133  | -       | -       | -6.19  |
| <b>C1</b>              | -48430.590 | 327.738 | 214.74  | -19.70 |
| <b>C1a-TS</b>          | -48428.949 | 323.539 | 204.51  | -24.80 |
| <b>C1b-TS</b>          | -48429.254 | 325.016 | 202.95  | -26.65 |



H -5.484239101 25.666135788 13.462476730  
N -8.362779617 23.996620178 12.881690025  
H -7.936291695 25.776350021 13.836273193  
C -7.839528561 22.961675644 12.224221230  
H -8.547472000 22.210206985 11.868839264  
H -6.118187428 21.939016342 11.420926094  
C -4.110197544 23.654642105 12.211667061  
H -3.630988359 23.036495209 13.172302246  
H -3.905821800 23.042917252 11.180226326  
H -3.608176470 24.782997131 12.171600342

=====  
3a  
=====

P -9.506259918 9.262967110 7.110801220  
O -10.442438126 8.005697250 7.473832130  
O -9.430193901 10.246900558 8.199023247  
O -10.059033394 9.786651611 5.692063808  
C -10.629548073 6.998232841 6.493062496  
H -9.670803070 6.649164677 6.082849026  
H -11.125844002 6.157337666 6.981164932  
H -11.251768112 7.358708858 5.664864540  
C -11.244074821 10.581050873 5.727045536  
H -11.422454834 10.938740730 4.711642742  
H -12.103495598 9.982652664 6.057592869  
H -11.120107651 11.432462692 6.404432774  
H -8.316870689 8.674837112 6.653928280

=====  
A1  
=====

P -9.686430931 9.324294090 7.190940857  
O -10.060279846 7.765695095 7.406436920  
O -10.012427330 10.190062523 8.352016449  
O -10.529404640 9.641372681 5.828360081  
C -10.051469803 6.877927780 6.295254230  
H -9.127081871 6.969864845 5.710341930  
H -10.114775658 5.864920616 6.697468281  
H -10.906907082 7.071787357 5.640263081  
C -10.799750328 11.009169579 5.539074898  
H -11.445662498 11.025456429 4.658847332  
H -11.304450035 11.492768288 6.381834030  
H -9.876955032 11.557757378 5.312453270

=====  
A1-TS  
=====

C -11.619331360 19.533327103 5.080024242  
C -12.461357117 18.617189407 5.720238209  
C -10.544341087 20.104864120 5.774565220  
H -13.300213814 18.163440704 5.198777199  
H -9.909474373 20.813476563 5.245893478  
C -12.217735291 18.284696579 7.045086384  
C -10.313105583 19.765304565 7.092885017  
H -12.858579636 17.574449539 7.565371990  
H -9.479101181 20.208181381 7.632473469  
C -11.150523186 18.848178864 7.744369507  
O -11.760233879 19.930250168 3.796722412  
C -12.826095581 19.387983322 3.050181627  
H -12.744559288 18.293516159 2.961395025  
H -13.802024841 19.638681412 3.494050741  
H -12.762474060 19.832471848 2.054735899  
C -10.960801125 18.439683914 9.150162697

O -11.668259621 17.649129868 9.739088058  
O -9.901376724 19.043731689 9.726919174  
C -9.668888092 18.677984238 11.087437630  
H -9.522860527 17.590183258 11.152224541  
H -10.561375618 18.912813187 11.684969902  
C -8.455567360 19.431335449 11.573506355  
H -7.598872185 19.194435120 10.926007271  
H -8.630151749 20.511943817 11.478489876  
C -8.129531860 19.070924759 13.020272255  
H -7.982732296 17.979623795 13.099032402  
H -8.980452538 19.312063217 13.676775932  
C -6.896888733 19.741451263 13.520761490  
H -6.010467529 19.658805847 12.887066841  
C -6.781932831 20.343654633 14.718627930  
H -7.650308609 20.495141983 15.360386848  
H -5.862474918 20.839742661 15.019908905  
O -4.736972809 17.932352066 15.132202148  
P -6.002316952 18.149141312 16.119138718  
O -5.757310390 17.837556839 17.559104919  
O -7.058542252 17.111902237 15.409073830  
C -3.964716673 16.745328903 15.325071335  
C -8.284904480 16.916704178 16.099269867  
H -4.566683292 15.857135773 15.093553543  
H -3.116816282 16.799203873 14.637850761  
H -3.599891424 16.681100845 16.356380463  
H -8.899560928 16.250150681 15.487613678  
H -8.116278648 16.468585968 17.085102081  
H -8.824339867 17.867895126 16.231956482

=====  
A2  
=====

C -10.945592880 19.652900696 5.666683197  
C -12.254388809 19.823717117 6.124331474  
C -9.865454674 19.928176880 6.513554096  
H -13.105011940 19.615411758 5.482589245  
H -8.860700607 19.783956528 6.125224590  
C -12.465977669 20.265529633 7.422723293  
C -10.090134621 20.366256714 7.803652287  
H -13.474760056 20.404588699 7.804057121  
H -9.253310204 20.576351166 8.463841438  
C -11.397603035 20.539834976 8.273262024  
O -10.620820045 19.226205826 4.426170826  
C -11.668064117 18.923641205 3.535542250  
H -12.305503845 18.114826202 3.919625282  
H -12.293926239 19.803806305 3.331401587  
H -11.199079514 18.596511841 2.605481386  
C -11.707654953 20.995918274 9.643459320  
O -12.828409195 21.149570465 10.079314232  
O -10.599646568 21.223897934 10.372553825  
C -10.832586288 21.632835388 11.721940041  
H -11.442034721 20.872734070 12.230138779  
H -11.416473389 22.564378738 11.723685265  
C -9.490938187 21.801216125 12.389334679  
H -8.935707092 20.854967117 12.337175369  
H -8.907006264 22.563251495 11.851037979  
C -9.649184227 22.200563431 13.860116005  
H -10.198538780 21.404804230 14.385473251  
H -10.280015945 23.105157852 13.915650368  
C -8.348988533 22.443782806 14.541554451  
H -7.720160484 23.266809464 14.201125145  
C -7.835270405 21.549392700 15.611056328  
H -8.634440422 21.205368042 16.283851624

|   |              |              |              |
|---|--------------|--------------|--------------|
| H | -7.054000854 | 22.019662857 | 16.219697952 |
| O | -6.457957745 | 19.349830627 | 16.139858246 |
| P | -7.104001999 | 20.070257187 | 14.860378265 |
| O | -7.994009972 | 19.251171112 | 14.006667137 |
| O | -5.784460545 | 20.607128143 | 14.094715118 |
| C | -5.788324356 | 18.110170364 | 15.924201012 |
| C | -5.841565609 | 20.810144424 | 12.687738419 |
| H | -4.874126911 | 18.267324448 | 15.340002060 |
| H | -5.527804852 | 17.710372925 | 16.905809402 |
| H | -6.441670418 | 17.403549194 | 15.400253296 |
| H | -4.813180923 | 20.921651840 | 12.336881638 |
| H | -6.316951275 | 19.960460663 | 12.186306000 |
| H | -6.403398514 | 21.723899841 | 12.449661255 |

=====

A2-TS

=====

|   |               |              |              |
|---|---------------|--------------|--------------|
| C | -11.052367210 | 20.039436340 | 5.616864204  |
| C | -10.207585335 | 21.094697952 | 5.985687256  |
| C | -11.745305061 | 19.316570282 | 6.600877285  |
| H | -9.664113045  | 21.664468765 | 5.237572193  |
| H | -12.391795158 | 18.504486084 | 6.277976036  |
| C | -10.067747116 | 21.411214828 | 7.326597214  |
| C | -11.599238396 | 19.641931534 | 7.931489944  |
| H | -9.415748596  | 22.226854324 | 7.632135868  |
| H | -12.137420654 | 19.081239700 | 8.690968513  |
| C | -10.754612923 | 20.697492599 | 8.312188148  |
| O | -11.263311386 | 19.643522263 | 4.353138924  |
| C | -10.600813866 | 20.328931808 | 3.308787823  |
| H | -10.885971069 | 21.389951706 | 3.282224417  |
| H | -9.509155273  | 20.247135162 | 3.404560566  |
| H | -10.915375710 | 19.849531174 | 2.380661249  |
| C | -10.554393768 | 21.083457947 | 9.707373619  |
| O | -9.817821503  | 21.995035172 | 10.072344780 |
| O | -11.259492874 | 20.340051651 | 10.577018738 |
| C | -11.105606079 | 20.675666809 | 11.955523491 |
| H | -12.011454582 | 20.309968948 | 12.449233055 |
| H | -11.076985359 | 21.769454956 | 12.058137894 |
| C | -9.850249290  | 20.052495956 | 12.548810005 |
| H | -10.004335403 | 18.977823257 | 12.697227478 |
| H | -9.042369843  | 20.134483337 | 11.807732582 |
| C | -9.437666893  | 20.741590500 | 13.855696678 |
| H | -9.563573837  | 20.070873260 | 14.725390434 |
| H | -10.092521667 | 21.600269318 | 14.078131676 |
| C | -8.019768715  | 21.199913025 | 13.887762070 |
| H | -7.285226822  | 20.529766083 | 13.429483414 |
| C | -7.542155743  | 21.938261032 | 15.085970879 |
| H | -8.277989388  | 22.679065704 | 15.429951668 |
| H | -6.578137398  | 22.438539505 | 14.922530174 |
| O | -6.751502514  | 21.740314484 | 17.641262054 |
| P | -7.279691219  | 20.782114029 | 16.470539093 |
| O | -8.426455498  | 19.922275543 | 16.832738876 |
| O | -5.970912457  | 20.032249451 | 15.921029091 |
| C | -7.190504551  | 21.542509079 | 18.991895676 |
| C | -5.375734329  | 19.053365707 | 16.778551102 |
| H | -6.502045631  | 20.867076874 | 19.510629654 |
| H | -7.175756454  | 22.518285751 | 19.480541229 |
| H | -8.199545860  | 21.121395111 | 19.016691208 |
| H | -4.905683517  | 19.542491913 | 17.640165329 |
| H | -6.125280380  | 18.331624985 | 17.120935440 |
| H | -4.610469818  | 18.537435532 | 16.197183609 |
| C | -5.541645527  | 23.616514206 | 12.309393883 |
| C | -6.031617641  | 24.743871689 | 13.019014359 |

|   |               |              |              |
|---|---------------|--------------|--------------|
| C | -6.448859215  | 22.654899597 | 11.908337593 |
| C | -7.373273849  | 24.869350433 | 13.259075165 |
| H | -5.354825020  | 25.520330429 | 13.364026070 |
| N | -8.220746994  | 23.913597107 | 12.816615105 |
| H | -7.841963291  | 25.696338654 | 13.784105301 |
| C | -7.818078518  | 22.751081467 | 12.226147652 |
| H | -8.597478867  | 22.217336655 | 11.677471161 |
| H | -6.119837284  | 21.782094955 | 11.348869324 |
| H | -3.743481398  | 24.382410049 | 11.433753014 |
| C | -4.086195469  | 23.507781982 | 11.998667717 |
| H | -3.495412588  | 23.476034164 | 12.922313690 |
| H | -3.859069824  | 22.611080170 | 11.416289330 |
| O | -9.551156998  | 24.061510086 | 13.106297225 |
| C | -10.247241020 | 24.657300949 | 11.989274025 |
| H | -11.283176422 | 24.735010147 | 12.323410988 |
| H | -9.844015121  | 25.656064987 | 11.783535004 |
| H | -10.177743912 | 24.009670258 | 11.106240273 |

=====

A3

=====

|   |               |              |              |
|---|---------------|--------------|--------------|
| C | -10.625491142 | 19.728900909 | 5.281431675  |
| C | -10.246848106 | 21.041458130 | 5.589430332  |
| C | -10.934973717 | 18.829433441 | 6.312530994  |
| H | -10.008102417 | 21.752439499 | 4.804742813  |
| H | -11.226357460 | 17.819414139 | 6.038100243  |
| C | -10.183848381 | 21.434892654 | 6.917079926  |
| C | -10.872416496 | 19.234134674 | 7.628273964  |
| H | -9.899230003  | 22.452655792 | 7.172845364  |
| H | -11.118799210 | 18.536224365 | 8.423044205  |
| C | -10.492860794 | 20.547233582 | 7.949615479  |
| O | -10.722876549 | 19.236421585 | 4.036566257  |
| C | -10.446149826 | 20.088758469 | 2.943964243  |
| H | -11.128549576 | 20.948751450 | 2.923750401  |
| H | -9.408628464  | 20.447950363 | 2.9678239003 |
| H | -10.596818924 | 19.491460800 | 2.043552637  |
| C | -10.418910980 | 21.030418396 | 9.332595825  |
| O | -10.064488411 | 22.152217865 | 9.664608002  |
| O | -10.793661118 | 20.094381332 | 10.227128029 |
| C | -10.793305397 | 20.472288132 | 11.600430489 |
| H | -11.493743896 | 19.788127899 | 12.091857910 |
| H | -11.178880692 | 21.496978760 | 11.699840546 |
| C | -9.407798767  | 20.379884720 | 12.209206581 |
| H | -9.006015778  | 19.366991043 | 12.073337555 |
| H | -8.758323669  | 21.050645828 | 11.635416985 |
| C | -9.432516098  | 20.757047653 | 13.688067436 |
| H | -9.788681030  | 19.902555466 | 14.280172348 |
| H | -10.168084145 | 21.552692413 | 13.868737221 |
| C | -8.069496155  | 21.180524826 | 14.240916252 |
| H | -7.330849648  | 20.427814484 | 13.928861618 |
| C | -8.013188362  | 21.197376251 | 15.774154663 |
| H | -6.967861176  | 21.227729797 | 16.114896774 |
| H | -8.422391891  | 20.254152298 | 16.157838821 |
| O | -10.245872498 | 22.645570755 | 16.004230499 |
| P | -8.820422173  | 22.500890732 | 16.738426208 |
| O | -8.846039772  | 22.290521622 | 18.196697235 |
| O | -8.044813156  | 23.852512360 | 16.277896881 |
| C | -11.219459534 | 23.480163574 | 16.649316788 |
| C | -7.455703735  | 24.719844818 | 17.273488998 |
| H | -10.894152641 | 24.528327942 | 16.628612518 |
| H | -12.149517059 | 23.375415802 | 16.088865280 |
| H | -11.370205879 | 23.161867142 | 17.685453415 |
| H | -7.636151314  | 25.756971359 | 16.964008331 |

|   |               |               |              |
|---|---------------|---------------|--------------|
| H | -7.905186176  | 24.541711807  | 18.255884171 |
| H | -6.369850159  | 24.537490845  | 17.331174850 |
| C | -8.805562973  | 23.917816162  | 11.924596786 |
| C | -7.864638329  | 23.533672333  | 10.939257622 |
| C | -8.622212410  | 23.469223022  | 13.210075378 |
| C | -6.775676250  | 22.7451031647 | 11.287691116 |
| H | -7.990516186  | 23.831291199  | 9.903499603  |
| N | -6.618129730  | 22.301866531  | 12.526070595 |
| H | -6.011936188  | 22.423858643  | 10.581776619 |
| C | -7.544984341  | 22.538688660  | 13.632414818 |
| H | -6.967080116  | 23.039667130  | 14.430325508 |
| H | -9.312979698  | 23.760520935  | 14.000236511 |
| H | -9.662669182  | 25.675346375  | 11.035382271 |
| C | -9.978122711  | 24.751255035  | 11.532447815 |
| H | -10.579173088 | 24.181978226  | 10.811516762 |
| H | -10.600105286 | 25.011869431  | 12.392542839 |
| O | -5.556722641  | 21.477567673  | 12.771298409 |
| C | -4.492326736  | 22.167064667  | 13.448815346 |
| H | -3.691516876  | 21.431394577  | 13.528037071 |
| H | -4.157452583  | 23.028001785  | 12.859178543 |
| H | -4.797051430  | 22.486034393  | 14.452737808 |

=====  
A4  
=====

|   |               |              |              |
|---|---------------|--------------|--------------|
| C | -10.243253708 | 22.041187286 | 7.174229145  |
| C | -11.161524773 | 22.565265656 | 8.088505745  |
| C | -9.547800064  | 20.864381790 | 7.478012085  |
| H | -11.713991165 | 23.473974228 | 7.869674206  |
| H | -8.841859818  | 20.483705521 | 6.744485855  |
| C | -11.365930557 | 21.910354614 | 9.295542717  |
| C | -9.751605988  | 20.229757309 | 8.687166214  |
| H | -12.080479622 | 22.297950745 | 10.018253326 |
| H | -9.196454048  | 19.328964233 | 8.932301521  |
| C | -10.665667534 | 20.747991562 | 9.613680840  |
| O | -9.954887390  | 22.596792221 | 5.978558540  |
| C | -10.585871696 | 23.809469223 | 5.638900280  |
| H | -11.676912308 | 23.695590973 | 5.575048447  |
| H | -10.350502968 | 24.602716446 | 6.362283230  |
| H | -10.199744225 | 24.094675064 | 4.658363819  |
| C | -10.898179054 | 20.135799408 | 10.939817429 |
| O | -11.686071396 | 20.567220688 | 11.757644653 |
| O | -10.116575241 | 19.060943604 | 11.133568764 |
| C | -10.182784081 | 18.366159439 | 12.391095161 |
| H | -10.060923576 | 17.310968399 | 12.126494408 |
| H | -11.177025795 | 18.513244629 | 12.830276489 |
| C | -9.078304291  | 18.833461761 | 13.321500778 |
| H | -8.835896492  | 18.022184372 | 14.022556305 |
| H | -8.173306465  | 18.991744995 | 12.717079163 |
| C | -9.439023018  | 20.103778839 | 14.089482307 |
| H | -10.034177780 | 19.833208084 | 14.974066734 |
| H | -10.101443291 | 20.736764908 | 13.493818283 |
| C | -8.223326683  | 20.900560379 | 14.551179886 |
| H | -7.560369492  | 20.204168320 | 15.090719223 |
| C | -8.598746300  | 22.001829147 | 15.568469048 |
| H | -7.700235844  | 22.356906891 | 16.094112396 |
| H | -9.260441780  | 21.597944260 | 16.345609665 |
| O | -10.394931793 | 22.970645905 | 13.858323097 |
| P | -9.382314682  | 23.521415710 | 14.967701912 |
| O | -9.925336838  | 24.378387451 | 16.043758392 |
| O | -8.299909592  | 24.271949768 | 14.029303551 |
| C | -10.927200317 | 23.816638947 | 12.848547935 |
| C | -7.268447876  | 25.011877060 | 14.662833214 |

|   |               |              |              |
|---|---------------|--------------|--------------|
| H | -10.130756378 | 24.142662048 | 12.167926788 |
| H | -11.658117294 | 23.214233398 | 12.302466393 |
| H | -11.418370247 | 24.693304062 | 13.287570000 |
| H | -6.783032417  | 25.615848541 | 13.892297745 |
| H | -7.673696518  | 25.663589478 | 15.445115089 |
| H | -6.518249989  | 24.331674576 | 15.094208717 |
| C | -7.152228355  | 22.522092819 | 11.226792336 |
| C | -5.831145287  | 22.864845276 | 11.598442078 |
| C | -7.902259827  | 21.807296753 | 12.177040100 |
| C | -5.330603123  | 22.517406464 | 12.814522743 |
| H | -5.200779438  | 23.431209564 | 10.914323807 |
| N | -6.106962204  | 21.861436844 | 13.769559860 |
| H | -4.322400570  | 22.759300232 | 13.140882492 |
| C | -7.413168907  | 21.472904205 | 13.416819572 |
| H | -8.944572449  | 21.576185226 | 11.956926346 |
| H | -7.383643627  | 23.921749115 | 9.612830162  |
| C | -7.704572201  | 22.910318375 | 9.894451141  |
| H | -7.374330997  | 22.236719131 | 9.089622498  |
| H | -8.801368713  | 22.890974045 | 9.893620491  |
| O | -5.345823288  | 20.763809204 | 14.360067368 |
| C | -4.905377865  | 21.159214020 | 15.637428284 |
| H | -4.272140980  | 20.345861435 | 16.004386902 |
| H | -4.311120987  | 22.085083008 | 15.598743439 |
| H | -5.740055084  | 21.310115814 | 16.339010239 |

=====  
A4-TS  
=====

|   |               |              |              |
|---|---------------|--------------|--------------|
| C | -10.407393456 | 22.161008835 | 7.175520420  |
| C | -11.344598770 | 22.620897293 | 8.106148720  |
| C | -9.650030136  | 21.015823364 | 7.452188015  |
| H | -11.947402954 | 23.502399445 | 7.907196045  |
| H | -8.931402206  | 20.684526443 | 6.706532478  |
| C | -11.507950783 | 21.932943344 | 9.300980568  |
| C | -9.810626030  | 20.350364685 | 8.651277542  |
| H | -12.243491173 | 22.264253616 | 10.031758308 |
| H | -9.206710815  | 19.475017548 | 8.876258850  |
| C | -10.743187904 | 20.803791046 | 9.594581604  |
| O | -10.159495354 | 22.751558304 | 5.987678528  |
| C | -10.868162155 | 23.927986145 | 5.669194221  |
| H | -11.951305389 | 23.746910095 | 5.613629818  |
| H | -10.676071167 | 24.726322174 | 6.400497913  |
| H | -10.509400368 | 24.248870850 | 4.689270020  |
| C | -10.946526527 | 20.146274567 | 10.904682159 |
| O | -11.782056808 | 20.489938736 | 11.716268539 |
| O | -10.074941635 | 19.138746262 | 11.092023849 |
| C | -10.132442474 | 18.387657166 | 12.317282677 |
| H | -9.963605881  | 17.348594666 | 12.015817642 |
| H | -11.137740135 | 18.479873657 | 12.745936394 |
| C | -9.064099312  | 18.866708755 | 13.280927658 |
| H | -8.850049973  | 18.064708710 | 14.001394272 |
| H | -8.135479927  | 19.016851425 | 12.711474419 |
| C | -9.461596489  | 20.145071030 | 14.017272949 |
| H | -10.096429825 | 19.880016327 | 14.875538826 |
| H | -10.098427773 | 20.772426605 | 13.386937141 |
| C | -8.272512436  | 20.950330734 | 14.529569626 |
| H | -7.625368118  | 20.265338898 | 15.102176666 |
| C | -8.700336456  | 22.059572220 | 15.516970634 |
| H | -7.831318378  | 22.406187057 | 16.094945908 |
| H | -9.415501595  | 21.667093277 | 16.251523972 |
| O | -10.352116585 | 23.027801514 | 13.664731026 |
| P | -9.424641609  | 23.580667496 | 14.847229958 |
| O | -10.045147896 | 24.455888748 | 15.865519524 |



O -8.264466286 24.313177109 13.987382889  
 C -10.800746918 23.875848770 12.616805077  
 C -7.295411110 25.070848465 14.696327209  
 H -9.977646828 24.083044052 11.919070244  
 H -11.595955849 23.330745697 12.101327896  
 H -11.196016312 24.820560455 13.010807037  
 H -6.744495392 25.661392212 13.959562302  
 H -7.772073269 25.736225128 15.425442696  
 H -6.585101128 24.402942657 15.208265305  
 C -6.993711472 22.434286118 11.217552185  
 C -5.745131016 22.883153915 11.687227249  
 C -7.799630165 21.744888306 12.134120941  
 C -5.357354164 22.635051727 12.976500511  
 H -5.084800243 23.450710297 11.033387184  
 N -6.166723251 21.977340698 13.871839523  
 H -4.400697708 22.964736938 13.379039764  
 C -7.404321194 21.526800156 13.439090729  
 H -8.795355797 21.425893784 11.824124336  
 H -7.081818104 23.657806396 9.451560974  
 C -7.431497097 22.681573868 9.809389114  
 H -7.035677910 21.924501419 9.115445137  
 H -8.525006294 22.654172897 9.719134331  
 O -5.325648308 20.780563354 14.506468773  
 C -4.951144218 21.180601120 15.793607712  
 H -4.279795647 20.401929855 16.178752899  
 H -4.404129982 22.139341354 15.797281265  
 H -5.808607578 21.275053024 16.482404709

O -10.307645798 22.841224670 15.754949570  
 P -8.847972870 22.945030212 16.421537399  
 O -8.795951843 23.169820786 17.882862091  
 O -8.230884552 24.160715103 15.550997734  
 C -11.200432777 23.932035446 15.969209671  
 C -6.999804974 24.728317261 15.983156204  
 H -10.863686562 24.813982010 15.412091255  
 H -12.181241035 23.621025085 15.603901863  
 H -11.266639709 24.174045563 17.036430359  
 H -6.825876236 25.617223740 15.371299744  
 H -7.048424721 25.006010056 17.041742325  
 H -6.172501087 24.024370193 15.818658829  
 C -7.866810799 23.794452667 11.832097054  
 C -6.512029648 24.083406448 11.994961739  
 C -8.403712273 22.782283783 12.621554375  
 C -5.774940014 23.341083527 12.906170845  
 H -6.036938667 24.871002197 11.411952972  
 N -6.281622410 22.358026505 13.651079178  
 H -4.712292194 23.549673080 13.045940399  
 C -7.585823536 22.088771820 13.512228012  
 H -9.460288048 22.544282913 12.522692680  
 H -8.388832092 25.612791061 10.737052917  
 C -8.702766418 24.510805130 10.818139076  
 H -8.548392296 24.019754410 9.786217690  
 H -9.806917191 24.428884506 11.083863258

=====  
 AI'-TS  
 =====

=====  
 4a  
 =====

C -10.208971977 20.600454330 5.804442883  
 C -10.319822311 21.824720383 6.469493389  
 C -10.284057617 19.402112961 6.524673462  
 H -10.266172409 22.764154434 5.927573204  
 H -10.194857597 18.468559265 5.975454807  
 C -10.499570847 21.834299088 7.845417976  
 C -10.461964607 19.425636292 7.893299103  
 H -10.589004517 22.774362564 8.385242462  
 H -10.515476227 18.496749878 8.454180717  
 C -10.570258141 20.646532059 8.571000099  
 O -10.027173996 20.469051361 4.473236561  
 C -9.934043884 21.640502930 3.696994543  
 H -10.852593422 22.240949631 3.758044720  
 H -9.080203056 22.261499405 4.002530575  
 H -9.787657738 21.316644669 2.664766788  
 C -10.735467911 20.739233017 10.033693314  
 O -10.810112000 21.788116455 10.644473076  
 O -10.786398888 19.530687332 10.625296593  
 C -10.831316948 19.552133560 12.059036255  
 H -11.279335022 18.595018387 12.343213081  
 H -11.498064995 20.362627029 12.377224922  
 C -9.439535141 19.748174667 12.642992020  
 H -8.900019646 18.792259216 12.687405586  
 H -8.875474930 20.380020142 11.945394516  
 C -9.464172363 20.417716980 14.014165878  
 H -9.787728310 19.701072693 14.783643723  
 H -10.216630936 21.217201233 14.026923180  
 C -8.102391243 20.984325409 14.414728165  
 H -7.360993862 20.172529221 14.325448990  
 C -8.034821510 21.420816422 15.888895035  
 H -6.982420444 21.569236755 16.167282104  
 H -8.417463303 20.629741669 16.547121048

=====  
 C -16.247779846 9.692886353 12.854621887  
 C -15.869604111 10.840161324 13.543323517  
 C -15.601464272 10.789536476 14.914381981  
 N -15.550818443 9.564156532 15.504986763  
 C -15.974157333 8.438343048 14.899209976  
 C -16.310777664 8.478205681 13.569401741  
 H -15.836585999 11.804375648 13.044535637  
 H -15.155218124 11.603265762 15.479012489  
 H -16.017173767 7.555361271 15.528799057  
 H -16.635663986 7.564629078 13.080438614  
 C -16.599149704 9.726636887 11.407632828  
 H -16.042829514 8.964382172 10.851100922  
 H -17.664712906 9.501155853 11.276916504  
 H -16.400079727 10.702354431 10.958908081  
 O -15.358693123 9.538276672 16.859003067  
 C -13.973770142 9.304713249 17.177007675  
 H -13.652371407 8.327391624 16.800384521  
 H -13.341607094 10.099982262 16.765869141  
 H -13.932077408 9.317573547 18.266336441  
 O -18.348779678 12.421326637 14.727421761  
 P -17.956403732 11.351011276 15.839293480  
 O -18.558238983 9.993158340 15.807971001  
 O -18.136171341 12.180558205 17.199735641  
 C -19.624399185 13.097769737 14.802329063  
 C -18.193773270 11.454468727 18.439537048  
 H -19.633806229 13.781005859 15.655019760  
 H -19.730201721 13.656771660 13.872624397  
 H -20.434156418 12.366318703 14.888542175  
 H -17.248619080 10.930833817 18.619459152  
 H -18.355997086 12.197084427 19.220550537  
 H -19.014175415 10.732113838 18.420425415

=====  
 A5  
 =====

```

=====
C -15.665939331 9.426069260 12.767734528
C -15.659790039 10.619835854 13.445247650
C -15.691160202 10.706363678 14.920944214
N -15.445311546 9.431862831 15.553765297
C -15.429431915 8.276544571 14.905241013
C -15.586369514 8.228219986 13.525053978
H -15.722461700 11.567329407 12.914157867
H -14.976768494 11.437364578 15.332869530
H -15.255599976 7.389532566 15.508795738
H -15.583672523 7.258491039 13.035038948
C -15.717493057 9.358840942 11.277340889
H -14.833484650 8.847098351 10.880152702
H -16.592428207 8.785804749 10.948468208
H -15.770913124 10.352798462 10.827292442
O -15.148438454 9.500647545 16.878667831
C -16.119169235 8.844220161 17.722038269
H -17.128074646 9.195506096 17.486740112
H -16.047641754 7.755054474 17.632940292
H -15.835850716 9.143867493 18.731109619
O -17.170118332 11.706983566 16.902423859
P -17.389348984 11.403662682 15.363847733
O -17.758903503 12.494316101 14.448358536
O -18.316131592 10.102087021 15.358250618
C -18.187503815 12.462661743 17.598606110
C -19.276023865 9.856250763 14.310253143
H -19.092132568 11.855675697 17.704935074
H -17.777917862 12.696567535 18.580560684
H -18.409137726 13.385405540 17.055179596
H -20.382621765 9.978018761 14.822204590
H -19.092388153 10.683487892 13.433870316
H -19.083354950 8.704730988 13.927601814

```

A6

```

=====
C -15.572784424 9.505921364 12.744935036
C -15.573019981 10.696508408 13.471717834
C -15.749917984 10.731269836 14.843874931
N -15.998684883 9.534355164 15.540100098
C -15.915936470 8.334965706 14.839567184
C -15.748105049 8.305459976 13.494342804
H -15.448106766 11.654438972 12.968852043
H -16.021986008 7.448467731 15.458272934
H -15.750853539 7.341579914 12.988822937
C -15.375486374 9.464323997 11.265427589
H -14.432239532 8.971653938 10.991792679
H -16.178272247 8.902956963 10.768661499
H -15.357601166 10.471719742 10.837399483
O -15.364718437 9.457316399 16.805904388
C -16.346696854 9.335227013 17.821107864
H -16.990417480 10.222176552 17.862525940
H -16.962028503 8.435195923 17.675567627
H -15.786157608 9.240163803 18.754678726
O -14.871380806 12.348010063 16.830425262
P -15.946516037 12.308945656 15.646380424
O -15.918089867 13.443522453 14.697808266
O -17.308992386 12.191967010 16.520553589
C -14.715439796 13.586275101 17.517999649
C -18.524501801 12.143070221 15.783608437
H -15.611310959 13.813168526 18.108459473
H -13.859869003 13.471953392 18.186180115
H -14.528469086 14.402621269 16.812074661

```

```

H -19.343118668 12.226041794 16.501186371
H -18.579547882 12.970589638 15.067243576
H -18.612358093 11.188670158 15.246732712

```

A2'-TS

```

=====
C -12.257213593 20.670097351 5.131645203
C -13.069772720 19.806015015 5.870092392
C -11.164428711 21.297428131 5.741492271
H -13.922140121 19.310745239 5.415001392
H -10.555230141 21.965467453 5.138500214
C -12.779825211 19.581897736 7.208505154
C -10.887420654 21.066373825 7.074291229
H -13.398360252 18.916336060 7.805933952
H -10.043884277 21.557804108 7.550775528
C -11.695185661 20.202619553 7.823828220
O -12.445156097 20.964443207 3.826178074
C -13.538830757 20.373743057 3.165843725
H -13.462460518 19.277276993 3.155403376
H -14.493885994 20.659751892 3.628656864
H -13.516285896 20.742193222 2.138330221
C -11.461181641 19.921588898 9.253915787
O -12.154911041 19.197862625 9.936140060
O -10.380623817 20.565420151 9.734880447
C -10.129020691 20.371572495 11.125765800
H -9.959897995 19.303031921 11.321762085
H -11.020875931 20.662031174 11.698886871
C -8.933015823 21.210454941 11.502948761
H -8.057952881 20.884733200 10.921879768
H -9.130387306 22.255620956 11.223181725
C -8.643119812 21.096698761 12.994233131
H -8.503851891 20.037572861 13.270247459
H -9.518911362 21.438915253 13.573472023
C -7.437250614 21.884866714 13.422579765
H -6.539382935 21.704486847 12.821072578
C -7.176213264 22.044942856 14.893461227
H -8.042379379 22.506307602 15.394256592
H -6.319183350 22.703691483 15.085669518
O -5.838187695 19.756290436 14.812884331
P -6.821232796 20.526002884 15.817854881
O -6.356045246 20.732772827 17.205577850
O -8.141737938 19.598237991 15.699605942
C -5.316004753 18.500045776 15.244378090
C -9.180612564 19.802568436 16.650295258
H -6.109992027 17.745113373 15.264665604
H -4.550599098 18.206859589 14.523735046
H -4.868943214 18.589376450 16.240716934
H -9.879167557 18.969385147 16.550275803
H -8.778873444 19.830175400 17.668636322
H -9.716747284 20.740184784 16.445940018
O -7.637492657 25.818994522 13.204622269
P -8.642363548 24.584476471 12.883827209
O -9.506196976 24.873378754 11.718876839
O -9.430131912 24.351419449 14.290508270
H -7.809020042 23.188203812 13.009247780
C -6.736483097 25.697397232 14.293236732
C -10.450966835 25.296863556 14.615773201
H -6.014484406 24.885457993 14.124643326
H -6.187084675 26.638044357 14.365428925
H -7.266375065 25.513864517 15.237174034
H -10.948449135 24.939205170 15.519208908
H -10.013437271 26.285024643 14.807830811

```

H -11.175625801 25.377220154 13.798678398

5a

C -11.800296783 20.620141983 4.920408726  
C -12.776162148 19.909030914 5.623317242  
C -10.693709373 21.147525787 5.597204208  
H -13.641107559 19.492261887 5.116194725  
H -9.953388214 21.694345474 5.019217491  
C -12.633592606 19.735301971 6.992768288  
C -10.564757347 20.968652725 6.960333824  
H -13.379414558 19.186000824 7.562335014  
H -9.707304001 21.378608704 7.486638546  
C -11.537162781 20.258193970 7.675203800  
O -11.835929871 20.851282120 3.590090275  
C -12.929878235 20.348848343 2.860253811  
H -12.987093925 19.252717972 2.918013334  
H -13.880811691 20.774171829 3.210922718  
H -12.770228386 20.642698288 1.820930243  
C -11.462694168 20.033611298 9.133047104  
O -12.284226418 19.415874481 9.776412010  
O -10.372195244 20.597650528 9.686722755  
C -10.249453545 20.426794052 11.099829674  
H -10.193249702 19.354103088 11.333150864  
H -11.155791283 20.809238434 11.590317726  
C -9.014924049 21.164054871 11.557662010  
H -8.134795189 20.760766983 11.035672188  
H -9.095042229 22.220548630 11.261439323  
C -8.829813957 21.050268173 13.063602448  
H -8.766067505 19.990821838 13.350852966  
H -9.721809387 21.454252243 13.572303772  
C -7.594110012 21.792335510 13.556014061  
H -6.692305565 21.362575531 13.097206116  
C -7.438333035 21.810186386 15.075899124  
H -8.384487152 22.081665039 15.567314148  
H -6.710953712 22.569471359 15.389873505  
O -5.538423061 19.975669861 15.045855522  
P -6.877071857 20.291236877 15.872763634  
O -6.761478424 20.361831665 17.345396042  
O -7.824695587 19.081596375 15.355657578  
C -4.768355846 18.847669601 15.453913689  
C -9.024342537 18.824584961 16.074857712  
H -5.288770676 17.917306900 15.198988914  
H -3.819605112 18.893844604 14.915792465  
H -4.580260277 18.877683640 16.533067703  
H -9.375263214 17.832956314 15.780657768  
H -8.846147537 18.849340439 17.155065536  
H -9.797212601 19.563081741 15.816719055  
H -7.645204067 22.833709717 13.205314636

B1-TS

C -16.145711899 9.479910851 13.005591393  
C -15.920877457 10.727292061 13.567619324  
C -15.791568756 10.835457802 14.970298767  
N -15.658923149 9.757672310 15.786930084  
C -15.872631073 8.574604034 15.227874756  
C -16.145257950 8.380837440 13.872809410  
H -15.925935745 11.628731728 12.957483292  
H -15.495458603 11.794875145 15.403248787  
H -15.809282303 7.710972786 15.891908646

H -16.321180344 7.377489090 13.489852905  
C -16.395015717 9.305462837 11.541060448  
H -15.870254517 8.428484917 11.146401405  
H -17.464925766 9.154338837 11.352610588  
H -16.079179764 10.184318542 10.970690727  
O -18.136560440 12.855835915 14.743241310  
P -18.076759338 11.466813087 15.568930626  
O -19.247182846 10.557615280 15.430496216  
O -17.852319717 12.054633141 17.071060181  
C -19.291143417 13.678059578 14.925119400  
C -17.826480865 11.093100548 18.124917984  
H -19.300275803 14.102993011 15.935371399  
H -19.232450485 14.483547211 14.190058708  
H -20.207090378 13.098723412 14.762065887  
H -16.983882904 10.402598381 17.989294052  
H -17.697893143 11.646528244 19.057466507  
H -18.763713837 10.526117325 18.157276154

B2

C -15.392765999 9.683361053 12.710859299  
C -15.339730263 10.670367241 13.656498909  
C -15.786263466 10.411798477 15.048490524  
N -16.007429123 9.042468071 15.452838898  
C -16.042072296 8.153400421 14.504421234  
C -15.793725967 8.394789696 13.128661156  
H -15.030669212 11.682282448 13.398279190  
H -15.133236885 10.907132149 15.787322998  
H -16.262578964 7.129078388 14.817961693  
H -15.872200012 7.579732418 12.412252426  
C -15.030116081 9.929244041 11.279848099  
H -14.240144730 9.245448112 10.946803093  
H -15.896699905 9.759275436 10.629461288  
H -14.685304642 10.955603600 11.121279716  
O -16.981313705 12.769259453 15.129292488  
P -17.417242050 11.236031532 15.328115463  
O -18.543249130 10.740549088 14.510178566  
O -17.652252197 11.185540199 16.917270660  
C -18.002820969 13.756833076 15.242544174  
C -18.359893799 10.071306229 17.463762283  
H -18.341415405 13.838434219 16.281816483  
H -17.568824768 14.706968307 14.925154686  
H -18.853487015 13.508082390 14.598048210  
H -18.597951889 10.325165749 18.498722076  
H -19.282905579 9.890106201 16.903293610  
H -17.728128433 9.177083969 17.430608749

B2-TS

C -9.880050659 20.666191101 5.051643848  
C -9.715157509 22.013490677 5.390424252  
C -10.213626862 19.729482651 6.038910389  
H -9.456047058 22.754627228 4.639479160  
H -10.334392548 18.690429688 5.740317822  
C -9.888139725 22.406324387 6.710228920  
C -10.379433632 20.132949829 7.348572254  
H -9.770579338 23.450296402 6.996070862  
H -10.636288643 19.407165527 8.115958214  
C -10.219469070 21.480978012 7.699398994  
O -9.739702225 20.169603348 3.803666115  
C -9.404144287 21.063520432 2.766992331

|   |               |              |              |
|---|---------------|--------------|--------------|
| H | -10.172278404 | 21.840402603 | 2.637540102  |
| H | -8.432844162  | 21.547603607 | 2.947139025  |
| H | -9.341204643  | 20.467464447 | 1.854118109  |
| C | -10.381737709 | 21.972848892 | 9.080863953  |
| O | -10.268659592 | 23.138444901 | 9.408340454  |
| O | -10.668993950 | 20.983932495 | 9.948287964  |
| C | -10.763159752 | 21.378744125 | 11.322106361 |
| H | -11.401843071 | 20.626075745 | 11.798124313 |
| H | -11.261477470 | 22.355123520 | 11.380970001 |
| C | -9.391586304  | 21.450502396 | 11.959275246 |
| H | -8.941770554  | 20.448778152 | 12.005246162 |
| H | -8.744510651  | 22.056734085 | 11.312402725 |
| C | -9.444265366  | 22.077070236 | 13.346131325 |
| H | -9.894538879  | 21.370038986 | 14.064868927 |
| H | -10.130508423 | 22.943670273 | 13.343592644 |
| C | -8.098962784  | 22.518913269 | 13.843939781 |
| H | -7.241593361  | 22.058427811 | 13.342152596 |
| C | -7.887012005  | 22.698602676 | 15.319003105 |
| H | -6.983994484  | 23.302181244 | 15.484371185 |
| H | -7.741497040  | 21.735031128 | 15.833717346 |
| O | -8.573227882  | 23.859464645 | 17.633850098 |
| P | -9.225854874  | 23.532880783 | 16.193780899 |
| O | -9.878928185  | 24.703100204 | 15.558874130 |
| O | -10.217430115 | 22.295370102 | 16.507305145 |
| C | -8.771507263  | 25.138946533 | 18.226289749 |
| C | -11.399031639 | 22.599672318 | 17.238107681 |
| H | -9.695621490  | 25.147930145 | 18.817422867 |
| H | -7.922002316  | 25.324281693 | 18.887441635 |
| H | -8.832312584  | 25.922513962 | 17.464847565 |
| H | -11.152663231 | 22.842123032 | 18.280334473 |
| H | -11.934764862 | 23.440923691 | 16.782550812 |
| H | -12.033040047 | 21.710895538 | 17.219993591 |
| C | -6.917132854  | 24.165243149 | 10.810752869 |
| C | -5.621815205  | 24.179893494 | 11.345707893 |
| C | -7.968299866  | 24.359640121 | 11.692779541 |
| C | -5.450259209  | 24.447431564 | 12.707728386 |
| H | -4.755804062  | 24.037101746 | 10.701185226 |
| N | -6.437300682  | 24.632331848 | 13.567898750 |
| H | -4.438044548  | 24.534442902 | 13.110892296 |
| C | -7.710073471  | 24.463062286 | 13.087389946 |
| H | -8.506049156  | 24.845209122 | 13.734387398 |
| H | -8.993786812  | 24.372207642 | 11.321896553 |
| C | -7.146451473  | 23.934326172 | 9.348225594  |
| H | -7.141374111  | 22.857818604 | 9.122054100  |
| H | -8.121539116  | 24.317499161 | 9.031229973  |
| H | -6.358390331  | 24.395196915 | 8.741637230  |

|   |               |              |              |
|---|---------------|--------------|--------------|
| H | -8.496239662  | 21.010829926 | 3.014680386  |
| H | -9.621288300  | 19.999841690 | 2.068670988  |
| C | -10.215359688 | 22.535871506 | 9.053285599  |
| O | -9.903943062  | 23.696712494 | 9.235918045  |
| O | -10.658290863 | 21.725067139 | 10.030447006 |
| C | -10.682055473 | 22.299045563 | 11.342969894 |
| H | -11.411552429 | 21.708623886 | 11.907229424 |
| H | -11.042799950 | 23.333524704 | 11.270095825 |
| C | -9.307719231  | 22.264558792 | 11.975272179 |
| H | -9.016163826  | 21.228813171 | 12.202179909 |
| H | -8.585067749  | 22.643259048 | 11.240005493 |
| C | -9.240150452  | 23.102678299 | 13.245136261 |
| H | -9.757946968  | 22.570333481 | 14.053667068 |
| H | -9.785781860  | 24.051630020 | 13.105822563 |
| C | -7.796441555  | 23.411281586 | 13.665806770 |
| H | -7.122047424  | 22.651752472 | 13.234551430 |
| C | -7.627138615  | 23.399364471 | 15.184391975 |
| H | -8.390449524  | 24.029409409 | 15.664308548 |
| H | -6.643559456  | 23.795640945 | 15.465275764 |
| O | -7.370287418  | 21.996662140 | 17.441633224 |
| P | -7.777400017  | 21.755912781 | 15.892812729 |
| O | -9.052090645  | 21.007987976 | 15.731451988 |
| O | -6.485305786  | 21.032476425 | 15.243159294 |
| C | -8.046278000  | 21.273904800 | 18.465311050 |
| C | -6.250940323  | 19.679204941 | 15.607033730 |
| H | -7.571714401  | 20.295042038 | 18.622264862 |
| H | -7.964060783  | 21.862806320 | 19.386257172 |
| H | -9.103288651  | 21.117870331 | 18.210165024 |
| H | -5.859447956  | 19.622526169 | 16.634117126 |
| H | -7.173341751  | 19.085336685 | 15.529620171 |
| H | -5.500933170  | 19.279420853 | 14.916845322 |
| C | -6.560632706  | 24.775243759 | 10.705484390 |
| C | -5.241153717  | 24.731033325 | 11.194254875 |
| C | -7.574157238  | 24.882322311 | 11.626793861 |
| C | -5.014126301  | 24.889251709 | 12.592280388 |
| H | -4.396115780  | 24.648542404 | 10.512594223 |
| N | -5.929606915  | 24.960298538 | 13.506127357 |
| H | -3.978076696  | 24.972951889 | 12.937888145 |
| C | -7.308384895  | 24.785385132 | 13.092280388 |
| H | -7.914136410  | 25.545513153 | 13.625393867 |
| H | -8.604258537  | 24.974592209 | 11.277249336 |
| C | -6.842913151  | 24.687263489 | 12.592280388 |
| H | -6.980044842  | 23.548135757 | 8.925096512  |
| H | -7.838037491  | 25.235088348 | 8.997155190  |
| H | -5.947920799  | 25.135389328 | 8.622410774  |

B3

|   |               |              |             |
|---|---------------|--------------|-------------|
| C | -10.024888039 | 20.676023483 | 5.219721317 |
| C | -9.600021362  | 21.996351242 | 5.392081738 |
| C | -10.509113312 | 19.946996689 | 6.312637806 |
| H | -9.218075752  | 22.575834274 | 4.556911945 |
| H | -10.829300880 | 18.922260284 | 6.143517017 |
| C | -9.671613693  | 22.572566986 | 6.652939796 |
| C | -10.573454857 | 20.531236649 | 7.561297894 |
| H | -9.349311829  | 23.599546432 | 6.811520576 |
| H | -10.949905396 | 19.967464447 | 8.410167694 |
| C | -10.157726288 | 21.856309891 | 7.744658947 |
| O | -10.007764816 | 20.015352249 | 4.042112827 |
| C | -9.544517517  | 20.700225830 | 2.902545214 |
| H | -10.158408165 | 21.585645676 | 2.685340643 |

C1

|   |               |              |             |
|---|---------------|--------------|-------------|
| C | -11.171760559 | 19.703538895 | 5.760352612 |
| C | -10.233585358 | 20.730812073 | 5.887507439 |
| C | -11.846017838 | 19.227109909 | 6.890913010 |
| H | -9.700442314  | 21.113918304 | 5.022602558 |
| H | -12.569303513 | 18.427120209 | 6.756313801 |
| C | -9.982918739  | 21.268411636 | 7.142183304 |
| C | -11.588453293 | 19.772079468 | 8.133165359 |
| H | -9.258563995  | 22.069839478 | 7.266236305 |
| H | -12.112640381 | 19.404695511 | 9.011031151 |
| C | -10.650411606 | 20.802564621 | 8.272862434 |
| O | -11.497138023 | 19.106414795 | 4.592910767 |
| C | -10.857585907 | 19.551156998 | 3.419881344 |
| H | -11.066589355 | 20.611927032 | 3.221671820 |
| H | -9.769332886  | 19.405950546 | 3.471290588 |

|   |               |              |              |
|---|---------------|--------------|--------------|
| H | -11.258724213 | 18.949979782 | 2.601517916  |
| C | -10.338065147 | 21.435447693 | 9.570905685  |
| O | -9.528059959  | 22.329059601 | 9.712671280  |
| O | -11.065062523 | 20.921012878 | 10.577248573 |
| C | -10.838809967 | 21.483413696 | 11.876531601 |
| H | -11.773322105 | 21.314128876 | 12.425302505 |
| H | -10.675595284 | 22.564891815 | 11.778285027 |
| C | -9.659653664  | 20.842037201 | 12.572260857 |
| H | -9.818531036  | 19.757249832 | 12.661291122 |
| H | -8.765429497  | 20.978349686 | 11.951592445 |
| C | -9.461626053  | 21.444480896 | 13.959582329 |
| H | -10.247364044 | 21.052843094 | 14.620871544 |
| H | -9.614279747  | 22.533882141 | 13.930013657 |
| C | -8.084910393  | 21.161279678 | 14.572373390 |
| H | -7.696331978  | 20.219058990 | 14.155988693 |
| C | -8.167534828  | 21.024732590 | 16.098056793 |
| H | -8.868712425  | 21.754280090 | 16.526758194 |
| H | -7.195025444  | 21.215692520 | 16.576229095 |
| O | -7.378949642  | 18.531444550 | 16.194568634 |
| P | -8.637366295  | 19.392606735 | 16.702857971 |
| O | -8.978283882  | 19.299158096 | 18.139429092 |
| O | -9.800601006  | 18.817041397 | 15.729060173 |
| C | -7.376295567  | 17.139101028 | 16.489648819 |
| C | -11.147904396 | 18.924961090 | 16.172714233 |
| H | -8.155333519  | 16.623567581 | 15.915672302 |
| H | -6.396442413  | 16.751049042 | 16.202983856 |
| H | -7.538412094  | 16.970203400 | 17.560684204 |
| H | -11.764219284 | 18.367633820 | 15.463533401 |
| H | -11.264034271 | 18.510736465 | 17.179040909 |
| H | -11.480235100 | 19.972990036 | 16.183149338 |
| C | -7.872198582  | 24.623485565 | 14.100454330 |
| C | -8.063488007  | 24.462892532 | 12.669278145 |
| C | -7.357169151  | 23.610349655 | 14.826210976 |
| C | -7.542945385  | 23.367179871 | 12.079301834 |
| H | -8.593258858  | 25.206716537 | 12.082240105 |
| N | -6.816594124  | 22.458486557 | 12.812801361 |
| H | -7.633225918  | 23.134756088 | 11.020293236 |
| C | -7.034569740  | 22.258010864 | 14.240429878 |
| H | -6.077800274  | 21.890722275 | 14.656023979 |
| H | -7.194904804  | 23.736389160 | 15.896172523 |
| O | -6.491390228  | 21.285470963 | 12.135161400 |
| C | -5.132748127  | 21.342546463 | 11.740857124 |
| H | -4.923392773  | 20.391466141 | 11.243601799 |
| H | -4.959370136  | 22.171314240 | 11.041114807 |
| H | -4.469799519  | 21.459632874 | 12.609020233 |
| C | -8.236792564  | 25.936723709 | 14.718025208 |
| H | -9.291315079  | 26.176347733 | 14.526546478 |
| H | -8.077053070  | 25.939680099 | 15.801121712 |
| H | -7.647739410  | 26.753284454 | 14.280462265 |

=====  
C1a-TS  
=====

|   |               |              |             |
|---|---------------|--------------|-------------|
| C | -11.065260887 | 19.987318039 | 6.662705421 |
| C | -11.150757790 | 21.215393066 | 7.328808308 |
| C | -10.952473640 | 18.798740387 | 7.395575523 |
| H | -11.237293243 | 22.147987366 | 6.778262138 |
| H | -10.884501457 | 17.861759186 | 6.846034050 |
| C | -11.127044678 | 21.237417221 | 8.716854095 |
| C | -10.927053452 | 18.835599899 | 8.775907516 |
| H | -11.197827339 | 22.182664871 | 9.254195213 |
| H | -10.833558083 | 17.914838791 | 9.345110893 |
| C | -11.017800331 | 20.059356689 | 9.455306053 |

|   |               |              |              |
|---|---------------|--------------|--------------|
| O | -11.081310272 | 19.844039917 | 5.320147514  |
| C | -11.197081566 | 21.005039215 | 4.529893398  |
| H | -12.135837555 | 21.541347504 | 4.733895779  |
| H | -10.351164818 | 21.690437317 | 4.689198017  |
| H | -11.194719315 | 20.671247482 | 3.489641905  |
| C | -10.973077774 | 20.165964127 | 10.927504539 |
| O | -11.029005051 | 21.218011856 | 11.537686348 |
| O | -10.843785286 | 18.966648102 | 11.528943062 |
| C | -10.580489159 | 19.018335342 | 12.939739227 |
| H | -10.895137787 | 18.044176102 | 13.327834129 |
| H | -11.204935074 | 19.800735474 | 13.388876915 |
| C | -9.107007027  | 19.305023193 | 13.173256874 |
| H | -8.501702309  | 18.401359558 | 13.016390800 |
| H | -8.804745674  | 20.010135651 | 12.391962051 |
| C | -8.820310593  | 19.929473877 | 14.529645920 |
| H | -9.005344391  | 19.209526062 | 15.339447975 |
| H | -9.524883270  | 20.767452240 | 14.678210258 |
| C | -7.391950130  | 20.472793579 | 14.666551590 |
| H | -6.673804283  | 19.639728546 | 14.621936798 |
| C | -7.203298092  | 21.216485977 | 15.995993614 |
| H | -8.088607788  | 21.812023163 | 16.265407562 |
| H | -6.364762306  | 21.924627304 | 15.933663368 |
| O | -5.463054180  | 19.484708786 | 16.927326202 |
| P | -6.801412582  | 20.205482483 | 17.435272217 |
| O | -6.737590790  | 20.930768967 | 18.722110748 |
| O | -7.827751637  | 18.949550629 | 17.453363419 |
| C | -4.783326149  | 18.629152298 | 17.842178345 |
| C | -9.035747528  | 19.114055634 | 18.186903000 |
| H | -5.365009308  | 17.716522217 | 18.016290665 |
| H | -3.825857639  | 18.370803833 | 17.386127472 |
| H | -4.611169338  | 19.142288208 | 18.795248032 |
| H | -9.531079292  | 18.140819550 | 18.215961456 |
| H | -8.831004143  | 19.460315704 | 19.205169678 |
| H | -9.701813698  | 19.835803986 | 17.690860748 |
| C | -8.229634285  | 22.815284729 | 11.877331734 |
| C | -7.611390591  | 22.048940659 | 10.854096413 |
| C | -7.932331085  | 22.464565277 | 13.161193848 |
| C | -6.730942249  | 21.027273178 | 11.152744293 |
| H | -7.864239693  | 22.248142242 | 9.812397003  |
| N | -6.440085888  | 20.633955002 | 12.397950172 |
| H | -6.266572952  | 20.452339172 | 10.351662636 |
| C | -7.011310577  | 21.376295090 | 13.474061966 |
| H | -6.001270294  | 21.900390625 | 13.743125916 |
| H | -8.355249405  | 23.028978348 | 13.993991852 |
| O | -4.628501415  | 21.611980438 | 12.846648216 |
| C | -3.821190596  | 20.700485229 | 13.466526985 |
| H | -3.012825489  | 21.204687119 | 14.032924652 |
| H | -4.359217644  | 20.042890549 | 14.187264442 |
| H | -3.304271460  | 20.039520264 | 12.743628502 |
| C | -9.200201988  | 23.897192001 | 11.528464317 |
| H | -10.115735054 | 23.446657181 | 11.122145653 |
| H | -9.478907585  | 24.482067108 | 12.411128044 |
| H | -8.790102959  | 24.583133698 | 10.776565552 |

=====  
C1b-TS  
=====

|   |               |              |             |
|---|---------------|--------------|-------------|
| C | -10.772510529 | 20.192104340 | 5.696019650 |
| C | -10.084339142 | 21.357545853 | 6.046061039 |
| C | -11.388947487 | 19.416801453 | 6.686753273 |
| H | -9.598915100  | 21.971311569 | 5.292726517 |
| H | -11.914998055 | 18.516475677 | 6.378988743 |
| C | -10.022517204 | 21.731998444 | 7.380370617 |

|   |               |              |              |
|---|---------------|--------------|--------------|
| C | -11.318210602 | 19.799930573 | 8.011461258  |
| H | -9.493995667  | 22.635297775 | 7.676797390  |
| H | -11.793992043 | 19.198331833 | 8.781521797  |
| C | -10.632292747 | 20.966663361 | 8.373473167  |
| O | -10.898126602 | 19.732387543 | 4.432790279  |
| C | -10.289329529 | 20.467327118 | 3.396007776  |
| H | -10.701112747 | 21.484415054 | 3.324762821  |
| H | -9.200140953  | 20.531528473 | 3.530515671  |
| H | -10.502870560 | 19.930110931 | 2.469710112  |
| C | -10.521126747 | 21.436227798 | 9.767215729  |
| O | -9.942248344  | 22.454202652 | 10.096173286 |
| O | -11.140108109 | 20.619964600 | 10.641678810 |
| C | -11.058058739 | 21.013107300 | 12.016924858 |
| H | -11.966817856 | 20.618280411 | 12.487584114 |
| H | -11.080075264 | 22.110446930 | 12.068833351 |
| C | -9.797733307  | 20.487831116 | 12.678689957 |
| H | -9.868838310  | 19.403644562 | 12.849119186 |
| H | -8.952720642  | 20.642831802 | 11.998005867 |
| C | -9.541220665  | 21.204513550 | 13.999336243 |
| H | -10.280120850 | 20.860160828 | 14.736070633 |
| H | -9.723916054  | 22.284812927 | 13.877540588 |
| C | -8.131434441  | 21.012601852 | 14.568973541 |
| H | -7.741591454  | 20.032697678 | 14.254404068 |
| C | -8.140750885  | 21.079490662 | 16.101882935 |
| H | -8.834002495  | 21.851362228 | 16.466758728 |
| H | -7.150087357  | 21.338006973 | 16.502355576 |
| O | -7.393118382  | 18.588956833 | 16.428546906 |
| P | -8.568787575  | 19.545434952 | 16.951198578 |
| O | -8.756718636  | 19.654922485 | 18.413780212 |
| O | -9.845606804  | 18.899944305 | 16.187288284 |
| C | -7.371962070  | 17.247817993 | 16.909694672 |
| C | -11.131940842 | 19.121046066 | 16.754055023 |
| H | -8.207934380  | 16.677824020 | 16.488426208 |
| H | -6.428195953  | 16.805923462 | 16.585102081 |
| H | -7.429409027  | 17.229171753 | 18.004056931 |
| H | -11.832987785 | 18.473066330 | 16.223514557 |
| H | -11.135589600 | 18.884138107 | 17.822513580 |
| H | -11.446389198 | 20.166801453 | 16.623517990 |
| C | -7.829648972  | 24.372692108 | 13.486801147 |
| C | -7.843110561  | 23.957036972 | 12.109144211 |
| C | -7.453719616  | 23.453884125 | 14.403216362 |
| C | -7.429429054  | 22.673389435 | 11.758896828 |
| H | -8.284568787  | 24.601953506 | 11.350021362 |
| N | -6.893208981  | 21.828445435 | 12.613059998 |
| H | -7.408953190  | 22.394378662 | 10.704471588 |
| C | -7.104502201  | 22.057237625 | 14.023655891 |
| H | -6.146754265  | 21.799446106 | 14.502635956 |
| H | -7.411640167  | 23.727922440 | 15.458690643 |
| O | -4.960057735  | 22.762928009 | 12.692272186 |
| C | -4.934880257  | 24.008584976 | 12.275893211 |
| H | -4.240641117  | 24.218402863 | 11.433128357 |
| H | -5.965747833  | 24.320831299 | 11.826714516 |
| H | -4.829941273  | 24.780303955 | 13.077045441 |
| C | -8.145962715  | 25.796361923 | 13.816352844 |
| H | -9.130984306  | 26.087789536 | 13.431249619 |
| H | -8.132559776  | 25.973169327 | 14.896295547 |
| H | -7.410835266  | 26.469274521 | 13.353728294 |

=====  
C2b

|   |               |              |              |
|---|---------------|--------------|--------------|
| C | -10.825003624 | 20.130760193 | 5.723255157  |
| C | -10.020807266 | 21.229215622 | 6.043638706  |
| C | -11.511682510 | 19.445014954 | 6.733379364  |
| H | -9.479640007  | 21.772857666 | 5.274517536  |
| H | -12.127685547 | 18.594736099 | 6.448863029  |
| C | -9.915139198  | 21.628414154 | 7.368399620  |
| C | -11.397054672 | 19.851852417 | 8.047774315  |
| H | -9.297086716  | 22.481353760 | 7.642031193  |
| H | -11.928697586 | 19.320453644 | 8.832925797  |
| C | -10.595389366 | 20.952919006 | 8.380437851  |
| O | -11.003777504 | 19.655363083 | 4.471793652  |
| C | -10.335042953 | 20.303661346 | 3.414638281  |
| H | -10.645654678 | 21.354991913 | 3.323010206  |
| H | -9.242943764  | 20.263488770 | 3.539929867  |
| H | -10.609021187 | 19.769300461 | 2.502418041  |
| C | -10.440650940 | 21.442983627 | 9.763818741  |
| O | -9.764476776  | 22.405805588 | 10.073710442 |
| O | -11.144099236 | 20.713548660 | 10.647928238 |
| C | -11.043783188 | 21.128999710 | 10.615365601 |
| H | -11.966717720 | 20.777458191 | 12.491581917 |
| H | -11.028471947 | 22.227033615 | 12.047145844 |
| C | -9.805356026  | 20.571239471 | 12.686329842 |
| H | -9.905632019  | 19.487684250 | 12.845518112 |
| H | -8.947551727  | 20.716804504 | 12.020966530 |
| C | -9.547711372  | 21.269678116 | 14.016274452 |
| H | -10.297568321 | 20.933925629 | 14.746659279 |
| H | -9.705991745  | 22.355464935 | 13.905157089 |
| C | -8.138598442  | 21.047872543 | 14.580534935 |
| H | -7.766178131  | 20.068483353 | 14.241426468 |
| C | -8.146433830  | 21.071048737 | 16.114511490 |
| H | -8.837748528  | 21.832521439 | 16.503435135 |
| H | -7.154900074  | 21.317779541 | 16.521406174 |
| O | -7.368530750  | 18.583099365 | 16.394615173 |
| P | -8.574165344  | 19.509677887 | 16.910766602 |
| O | -8.803149223  | 19.566701889 | 18.371189117 |
| O | -9.818280220  | 18.864055634 | 16.092792511 |
| C | -7.351173878  | 17.226978302 | 16.829227448 |
| C | -11.122653961 | 19.032207489 | 16.635036469 |
| H | -8.166003227  | 16.663496017 | 16.359222412 |
| H | -6.391983509  | 16.803834915 | 16.523620605 |
| H | -7.447238922  | 17.168798447 | 17.919887543 |
| H | -11.795941353 | 18.394870758 | 16.056781769 |
| H | -11.148954391 | 18.745990753 | 17.691267014 |
| H | -11.457180023 | 20.076030731 | 16.544778824 |
| C | -7.825631142  | 24.433879852 | 13.550915718 |
| C | -7.856862068  | 24.103153229 | 12.090957642 |
| C | -7.473496437  | 23.495981216 | 14.433192253 |
| C | -7.242542267  | 22.769123077 | 11.791336060 |
| H | -8.888543129  | 24.084802628 | 11.696999550 |
| N | -6.914865494  | 21.866586685 | 12.622062683 |
| H | -7.093179226  | 22.543600082 | 10.728610039 |
| C | -7.119534969  | 22.091367722 | 14.046564102 |
| H | -6.161355972  | 21.826282501 | 14.528841972 |
| H | -7.435105324  | 23.747642517 | 15.495839119 |
| H | -7.350925446  | 24.886352539 | 11.501306534 |
| C | -8.181263924  | 25.832519531 | 13.934958458 |
| H | -9.190292358  | 26.093019485 | 13.585763931 |
| H | -8.146104813  | 25.978284836 | 15.020019531 |
| H | -7.497011662  | 26.555633545 | 13.468991280 |

**Table S5. Vibrational frequencies (in cm<sup>-1</sup>) of the optimized structures**

|                 |         |         |         |         |         |
|-----------------|---------|---------|---------|---------|---------|
| Terminal Alkene |         |         |         |         |         |
| 11.13           | 27.74   | 47.70   | 57.33   | 83.49   | 91.24   |
| 115.28          | 128.62  | 150.83  | 185.44  | 207.10  | 243.75  |
| 248.10          | 314.67  | 323.86  | 354.20  | 401.58  | 425.46  |
| 438.32          | 495.13  | 516.97  | 544.01  | 622.15  | 642.15  |
| 650.71          | 701.09  | 742.07  | 779.31  | 810.78  | 825.21  |
| 844.08          | 856.19  | 884.16  | 927.17  | 935.79  | 970.13  |
| 976.60          | 1013.08 | 1018.81 | 1028.20 | 1050.10 | 1071.52 |
| 1107.88         | 1110.73 | 1119.60 | 1165.42 | 1166.45 | 1176.26 |
| 1183.48         | 1196.77 | 1221.06 | 1247.53 | 1289.02 | 1294.43 |
| 1301.29         | 1304.25 | 1326.05 | 1329.62 | 1362.99 | 1396.89 |
| 1423.02         | 1431.23 | 1459.18 | 1461.20 | 1465.44 | 1466.64 |
| 1475.22         | 1481.62 | 1493.39 | 1564.98 | 1650.35 | 1688.21 |
| 1740.77         | 1848.50 | 3001.09 | 3005.46 | 3025.38 | 3034.83 |
| 3057.08         | 3074.95 | 3084.43 | 3096.22 | 3120.82 | 3137.74 |
| 3152.47         | 3194.81 | 3196.31 | 3210.79 | 3214.78 | 3231.83 |
| Prydinium       |         |         |         |         |         |
| 8.82            | 82.56   | 100.79  | 189.46  | 230.45  | 321.43  |
| 390.79          | 413.39  | 451.55  | 466.88  | 554.79  | 666.23  |
| 697.37          | 746.58  | 833.09  | 845.63  | 860.11  | 966.86  |
| 985.26          | 1003.11 | 1013.90 | 1038.80 | 1061.46 | 1127.18 |
| 1154.57         | 1186.30 | 1191.19 | 1228.87 | 1261.83 | 1313.10 |
| 1357.87         | 1392.03 | 1431.68 | 1436.10 | 1443.41 | 1459.57 |
| 1469.22         | 1498.70 | 1526.90 | 1627.04 | 1686.94 | 3035.06 |
| 3044.57         | 3129.15 | 3138.71 | 3163.72 | 3193.16 | 3207.54 |
| 3207.82         | 3225.82 | 3227.22 |         |         |         |
| AcOH            |         |         |         |         |         |
| 75.78           | 420.28  | 542.21  | 588.42  | 687.54  | 888.56  |
| 994.73          | 1057.93 | 1223.02 | 1342.25 | 1420.57 | 1447.52 |
| 1451.25         | 1906.08 | 3061.68 | 3146.42 | 3188.19 | 3821.90 |
| AcO-            |         |         |         |         |         |
| 41.79           | 418.91  | 601.64  | 623.41  | 877.07  | 974.14  |
| 1016.39         | 1293.58 | 1409.90 | 1450.03 | 1462.68 | 1820.78 |
| 2995.72         | 3081.29 | 3095.33 |         |         |         |
| •OMe            |         |         |         |         |         |
| 649.72          | 964.45  | 1159.91 | 1348.95 | 1349.35 | 1508.66 |
| 2899.39         | 2978.26 | 3018.83 |         |         |         |
| pyridine        |         |         |         |         |         |
| 257.18          | 383.91  | 414.65  | 513.15  | 533.70  | 679.93  |
| 755.13          | 810.51  | 823.24  | 826.10  | 881.40  | 974.04  |
| 992.84          | 1006.82 | 1090.56 | 1103.65 | 1197.91 | 1222.07 |
| 1233.27         | 1254.11 | 1333.41 | 1350.21 | 1450.36 | 1494.34 |

|         |         |         |         |         |         |
|---------|---------|---------|---------|---------|---------|
| 1503.03 | 1514.02 | 1533.47 | 1637.28 | 1669.58 | 1989.58 |
| 2026.32 | 2160.08 | 3133.99 | 3137.79 | 3168.26 | 3178.14 |

3a

|         |         |         |         |         |         |
|---------|---------|---------|---------|---------|---------|
| 89.11   | 94.20   | 110.95  | 149.55  | 229.16  | 233.85  |
| 399.93  | 429.21  | 546.14  | 784.50  | 842.81  | 995.61  |
| 1013.44 | 1130.77 | 1134.25 | 1168.02 | 1171.24 | 1190.01 |
| 1197.12 | 1351.72 | 1457.33 | 1462.21 | 1466.04 | 1468.77 |
| 1473.46 | 1480.62 | 2507.38 | 3011.02 | 3026.03 | 3095.73 |
| 3118.64 | 3153.37 | 3162.45 |         |         |         |

A1

|         |         |         |         |         |         |
|---------|---------|---------|---------|---------|---------|
| 64.19   | 79.85   | 96.13   | 133.15  | 183.42  | 239.37  |
| 375.66  | 416.71  | 465.61  | 748.27  | 811.09  | 1106.95 |
| 1123.18 | 1164.40 | 1166.02 | 1178.70 | 1187.89 | 1258.36 |
| 1455.13 | 1459.83 | 1464.57 | 1464.81 | 1473.48 | 1475.76 |
| 3024.28 | 3027.00 | 3116.34 | 3118.52 | 3156.19 | 3156.52 |

A1-TS

|         |         |         |         |         |         |
|---------|---------|---------|---------|---------|---------|
| -129.26 | 10.12   | 16.23   | 24.43   | 38.41   | 45.30   |
| 58.57   | 63.15   | 74.90   | 80.71   | 90.40   | 92.96   |
| 118.23  | 125.90  | 131.20  | 137.30  | 140.51  | 152.13  |
| 186.82  | 189.02  | 206.05  | 217.66  | 256.48  | 270.58  |
| 278.04  | 320.05  | 327.52  | 354.64  | 367.80  | 407.68  |
| 427.02  | 432.57  | 452.82  | 496.72  | 505.91  | 520.79  |
| 545.31  | 623.56  | 642.16  | 678.02  | 703.39  | 743.06  |
| 746.23  | 780.62  | 804.12  | 810.41  | 831.04  | 844.23  |
| 859.61  | 881.48  | 890.20  | 931.14  | 973.99  | 981.13  |
| 989.40  | 1016.01 | 1027.23 | 1051.63 | 1073.02 | 1082.06 |
| 1105.20 | 1108.67 | 1113.58 | 1121.85 | 1162.26 | 1166.40 |
| 1167.99 | 1168.31 | 1176.15 | 1178.81 | 1182.13 | 1185.01 |
| 1198.48 | 1218.23 | 1225.29 | 1244.00 | 1283.58 | 1287.48 |
| 1298.42 | 1302.34 | 1324.40 | 1328.46 | 1357.14 | 1388.31 |
| 1421.05 | 1429.47 | 1451.03 | 1452.76 | 1455.86 | 1460.43 |
| 1463.18 | 1464.72 | 1466.51 | 1468.10 | 1475.03 | 1475.41 |
| 1476.28 | 1483.05 | 1494.04 | 1562.22 | 1642.68 | 1649.03 |
| 1685.04 | 1838.25 | 2987.50 | 2991.10 | 2997.40 | 3022.22 |
| 3022.28 | 3033.04 | 3045.02 | 3063.25 | 3069.78 | 3092.31 |
| 3092.77 | 3115.63 | 3128.55 | 3136.19 | 3139.04 | 3146.95 |
| 3147.24 | 3181.07 | 3182.58 | 3198.77 | 3202.48 | 3231.17 |

A2

|         |         |         |         |         |         |
|---------|---------|---------|---------|---------|---------|
| 10.91   | 14.27   | 25.30   | 37.06   | 53.24   | 65.78   |
| 80.47   | 86.36   | 91.22   | 97.47   | 117.62  | 122.55  |
| 124.66  | 128.68  | 137.53  | 155.90  | 186.27  | 198.76  |
| 217.27  | 241.53  | 248.30  | 252.13  | 267.32  | 303.27  |
| 324.89  | 329.38  | 364.06  | 390.46  | 400.31  | 425.61  |
| 428.73  | 462.39  | 490.46  | 494.17  | 517.09  | 534.71  |
| 544.48  | 624.22  | 642.83  | 701.27  | 724.24  | 741.00  |
| 778.40  | 800.26  | 810.97  | 825.42  | 827.46  | 849.98  |
| 855.98  | 866.10  | 883.89  | 958.14  | 969.59  | 976.78  |
| 1018.23 | 1035.17 | 1056.01 | 1062.02 | 1101.95 | 1110.94 |



|         |         |         |         |         |         |
|---------|---------|---------|---------|---------|---------|
| 1112.94 | 1119.27 | 1133.80 | 1150.67 | 1165.97 | 1166.73 |
| 1169.34 | 1170.69 | 1179.11 | 1183.64 | 1189.80 | 1192.91 |
| 1197.39 | 1209.89 | 1232.41 | 1246.16 | 1289.88 | 1301.28 |
| 1301.98 | 1309.61 | 1323.25 | 1328.92 | 1346.55 | 1395.70 |
| 1401.62 | 1419.84 | 1426.06 | 1453.28 | 1456.71 | 1457.95 |
| 1459.57 | 1464.42 | 1465.62 | 1465.62 | 1467.06 | 1470.86 |
| 1477.03 | 1479.63 | 1482.10 | 1493.95 | 1565.28 | 1650.65 |
| 1688.42 | 1846.00 | 2978.63 | 3002.56 | 3020.07 | 3021.78 |
| 3029.82 | 3030.73 | 3031.56 | 3055.68 | 3077.15 | 3080.15 |
| 3100.93 | 3112.30 | 3113.08 | 3122.88 | 3150.39 | 3151.51 |
| 3153.57 | 3157.95 | 3195.58 | 3197.20 | 3211.24 | 3214.63 |

=====

A2-TS

=====

|         |         |         |         |         |         |
|---------|---------|---------|---------|---------|---------|
| -242.57 | 10.53   | 13.14   | 20.35   | 33.85   | 39.40   |
| 45.23   | 47.26   | 55.12   | 57.71   | 67.83   | 72.34   |
| 80.54   | 87.38   | 93.42   | 96.75   | 101.32  | 108.37  |
| 116.75  | 129.96  | 136.61  | 144.80  | 152.55  | 168.93  |
| 182.17  | 202.12  | 227.22  | 234.67  | 241.64  | 246.70  |
| 249.80  | 262.41  | 282.93  | 300.73  | 312.44  | 318.78  |
| 327.40  | 360.59  | 374.28  | 381.72  | 390.01  | 413.80  |
| 424.57  | 425.06  | 447.71  | 459.84  | 463.74  | 478.18  |
| 517.03  | 525.19  | 540.25  | 555.25  | 559.89  | 630.37  |
| 642.06  | 655.37  | 676.68  | 705.47  | 728.07  | 730.77  |
| 745.77  | 781.00  | 786.37  | 800.39  | 806.05  | 809.95  |
| 827.56  | 832.64  | 838.78  | 855.99  | 859.75  | 864.23  |
| 869.27  | 900.57  | 953.03  | 963.77  | 973.28  | 978.50  |
| 997.05  | 997.79  | 1011.52 | 1014.47 | 1042.58 | 1045.18 |
| 1053.40 | 1065.55 | 1075.35 | 1088.30 | 1096.98 | 1097.37 |
| 1116.95 | 1117.62 | 1125.76 | 1144.28 | 1162.76 | 1164.62 |
| 1165.27 | 1166.90 | 1167.22 | 1168.27 | 1178.52 | 1184.73 |
| 1191.14 | 1193.52 | 1195.64 | 1198.53 | 1211.73 | 1224.21 |
| 1236.28 | 1242.97 | 1270.51 | 1284.91 | 1303.95 | 1314.46 |
| 1317.23 | 1318.46 | 1335.05 | 1341.40 | 1353.48 | 1362.54 |
| 1395.44 | 1398.80 | 1407.83 | 1425.56 | 1432.13 | 1438.03 |
| 1445.28 | 1447.72 | 1450.94 | 1453.40 | 1455.61 | 1457.86 |
| 1462.09 | 1466.31 | 1467.27 | 1467.69 | 1469.95 | 1471.19 |
| 1472.90 | 1474.42 | 1474.45 | 1477.04 | 1481.44 | 1486.93 |
| 1518.47 | 1566.47 | 1587.76 | 1636.99 | 1664.33 | 1681.64 |
| 1767.16 | 2980.98 | 3005.62 | 3022.58 | 3032.66 | 3033.98 |
| 3037.21 | 3040.98 | 3041.26 | 3042.59 | 3050.25 | 3087.66 |
| 3099.52 | 3106.45 | 3118.23 | 3118.67 | 3123.53 | 3126.65 |
| 3127.97 | 3134.12 | 3140.77 | 3153.81 | 3162.43 | 3167.18 |
| 3168.15 | 3176.09 | 3189.33 | 3193.42 | 3196.09 | 3206.31 |
| 3209.31 | 3211.39 | 3223.88 |         |         |         |

=====

A3

=====

|        |        |        |        |        |        |
|--------|--------|--------|--------|--------|--------|
| 14.19  | 20.74  | 32.39  | 34.29  | 40.16  | 48.20  |
| 48.89  | 63.91  | 69.84  | 74.70  | 83.91  | 93.68  |
| 99.63  | 111.19 | 113.93 | 121.13 | 132.53 | 142.51 |
| 147.13 | 154.89 | 168.30 | 169.10 | 177.90 | 183.66 |
| 203.65 | 212.46 | 223.45 | 236.50 | 248.31 | 254.10 |
| 263.82 | 290.27 | 304.45 | 312.93 | 328.08 | 338.24 |
| 351.49 | 376.18 | 379.93 | 388.71 | 415.25 | 423.61 |
| 424.60 | 459.79 | 474.33 | 478.25 | 496.07 | 511.69 |

|         |         |         |         |         |         |
|---------|---------|---------|---------|---------|---------|
| 520.92  | 529.53  | 536.82  | 560.12  | 621.17  | 636.89  |
| 642.77  | 647.31  | 702.88  | 704.03  | 726.85  | 737.26  |
| 763.67  | 769.74  | 781.04  | 794.90  | 797.28  | 824.73  |
| 827.68  | 836.29  | 855.36  | 857.62  | 864.94  | 872.24  |
| 906.73  | 949.76  | 967.96  | 976.11  | 985.38  | 1000.27 |
| 1011.01 | 1014.88 | 1021.76 | 1038.02 | 1047.63 | 1054.29 |
| 1059.92 | 1066.58 | 1080.99 | 1091.33 | 1099.65 | 1101.24 |
| 1120.04 | 1123.12 | 1148.79 | 1152.06 | 1162.88 | 1162.91 |
| 1166.28 | 1169.05 | 1177.00 | 1181.80 | 1187.76 | 1191.61 |
| 1194.31 | 1194.58 | 1204.27 | 1219.98 | 1228.65 | 1237.66 |
| 1256.59 | 1280.50 | 1297.35 | 1302.08 | 1310.20 | 1317.30 |
| 1322.27 | 1325.50 | 1335.45 | 1339.76 | 1350.07 | 1366.44 |
| 1377.03 | 1393.25 | 1395.31 | 1401.10 | 1422.21 | 1426.07 |
| 1433.45 | 1446.99 | 1449.18 | 1453.06 | 1458.66 | 1459.35 |
| 1462.96 | 1464.74 | 1465.33 | 1466.39 | 1467.81 | 1469.11 |
| 1469.57 | 1472.74 | 1477.58 | 1479.69 | 1480.11 | 1481.53 |
| 1527.87 | 1565.32 | 1571.38 | 1609.51 | 1639.85 | 1682.03 |
| 1790.80 | 2985.33 | 2991.70 | 3011.86 | 3028.12 | 3028.90 |
| 3038.28 | 3039.18 | 3039.96 | 3043.31 | 3050.30 | 3058.70 |
| 3091.77 | 3092.55 | 3094.58 | 3107.07 | 3107.88 | 3122.11 |
| 3124.82 | 3129.03 | 3131.24 | 3139.16 | 3154.35 | 3162.73 |
| 3170.55 | 3184.24 | 3185.27 | 3194.44 | 3201.71 | 3203.79 |
| 3215.37 | 3217.34 | 3227.61 |         |         |         |

=====

A4

=====

|         |         |         |         |         |         |
|---------|---------|---------|---------|---------|---------|
| 11.90   | 18.39   | 26.51   | 33.67   | 48.83   | 58.15   |
| 64.91   | 70.79   | 77.41   | 79.24   | 91.63   | 93.18   |
| 96.42   | 103.02  | 107.62  | 118.69  | 125.23  | 130.44  |
| 145.43  | 150.07  | 158.38  | 180.17  | 186.00  | 196.49  |
| 208.62  | 229.44  | 232.38  | 238.56  | 242.90  | 249.08  |
| 277.16  | 286.22  | 306.45  | 314.19  | 321.92  | 328.72  |
| 344.35  | 355.28  | 375.93  | 387.08  | 398.14  | 423.75  |
| 434.25  | 460.67  | 474.63  | 480.89  | 500.28  | 509.31  |
| 513.71  | 524.91  | 543.76  | 559.32  | 605.57  | 619.89  |
| 641.39  | 653.71  | 688.74  | 699.83  | 711.66  | 731.97  |
| 744.26  | 767.04  | 776.85  | 785.35  | 794.23  | 823.86  |
| 836.16  | 848.09  | 854.98  | 863.14  | 873.03  | 896.11  |
| 914.12  | 922.08  | 957.63  | 963.79  | 964.36  | 972.04  |
| 986.45  | 1004.91 | 1018.13 | 1026.62 | 1043.59 | 1071.50 |
| 1086.82 | 1090.98 | 1099.98 | 1108.89 | 1111.95 | 1118.70 |
| 1128.38 | 1141.68 | 1156.43 | 1161.71 | 1165.27 | 1169.47 |
| 1171.90 | 1172.52 | 1176.32 | 1181.63 | 1194.95 | 1195.31 |
| 1196.78 | 1200.27 | 1215.12 | 1219.09 | 1238.27 | 1280.42 |
| 1288.87 | 1298.57 | 1299.47 | 1312.42 | 1318.84 | 1320.19 |
| 1330.24 | 1330.81 | 1356.14 | 1373.46 | 1393.40 | 1398.84 |
| 1404.27 | 1411.49 | 1417.55 | 1422.65 | 1434.66 | 1446.30 |
| 1448.37 | 1451.61 | 1454.36 | 1454.53 | 1458.14 | 1459.06 |
| 1463.90 | 1464.24 | 1465.43 | 1465.85 | 1466.74 | 1467.73 |
| 1469.89 | 1473.59 | 1480.44 | 1480.76 | 1491.28 | 1529.28 |
| 1563.15 | 1646.70 | 1650.10 | 1685.06 | 1828.34 | 2988.72 |
| 3004.01 | 3004.51 | 3007.35 | 3011.14 | 3021.27 | 3028.21 |
| 3035.64 | 3044.19 | 3055.52 | 3060.61 | 3075.04 | 3080.90 |
| 3082.72 | 3100.16 | 3102.81 | 3113.26 | 3114.53 | 3122.49 |
| 3130.68 | 3144.79 | 3146.72 | 3151.70 | 3154.34 | 3166.41 |
| 3176.44 | 3191.85 | 3195.15 | 3196.19 | 3212.72 | 3213.87 |

=====

A4-TS

=====

|         |         |         |         |         |         |
|---------|---------|---------|---------|---------|---------|
| -522.00 | 14.10   | 22.97   | 30.84   | 34.88   | 50.10   |
| 57.73   | 67.69   | 75.98   | 78.33   | 85.00   | 90.93   |
| 96.60   | 103.38  | 104.44  | 122.44  | 126.32  | 135.42  |
| 149.92  | 157.88  | 159.44  | 169.64  | 183.25  | 190.53  |
| 200.70  | 207.20  | 231.23  | 239.01  | 242.49  | 247.91  |
| 254.37  | 276.68  | 280.64  | 303.03  | 315.39  | 323.48  |
| 328.30  | 337.10  | 354.89  | 373.18  | 389.01  | 419.12  |
| 426.36  | 428.36  | 462.01  | 475.79  | 479.42  | 513.68  |
| 516.01  | 519.73  | 528.85  | 540.61  | 556.19  | 619.56  |
| 641.14  | 642.18  | 691.08  | 700.52  | 721.47  | 730.89  |
| 764.96  | 777.51  | 783.69  | 787.59  | 795.59  | 827.02  |
| 836.82  | 847.01  | 855.71  | 859.86  | 865.33  | 881.90  |
| 918.06  | 921.58  | 926.63  | 958.95  | 969.75  | 976.22  |
| 991.75  | 1011.81 | 1017.73 | 1033.07 | 1043.39 | 1074.60 |
| 1085.42 | 1086.33 | 1105.05 | 1105.79 | 1114.36 | 1119.18 |
| 1124.70 | 1138.14 | 1160.71 | 1161.46 | 1165.74 | 1171.54 |
| 1172.03 | 1173.12 | 1175.65 | 1179.72 | 1180.98 | 1195.64 |
| 1196.84 | 1200.39 | 1215.71 | 1219.56 | 1240.60 | 1281.01 |
| 1294.56 | 1298.32 | 1299.38 | 1310.50 | 1316.71 | 1318.03 |
| 1329.03 | 1329.90 | 1354.00 | 1372.24 | 1390.63 | 1396.55 |
| 1404.70 | 1414.11 | 1420.38 | 1430.24 | 1443.68 | 1447.14 |
| 1450.62 | 1451.79 | 1454.28 | 1459.24 | 1459.34 | 1462.36 |
| 1463.26 | 1464.28 | 1466.24 | 1466.62 | 1466.98 | 1467.47 |
| 1471.76 | 1475.22 | 1481.37 | 1484.76 | 1487.90 | 1529.13 |
| 1561.96 | 1636.94 | 1643.88 | 1684.10 | 1828.72 | 2956.77 |
| 2999.39 | 3001.26 | 3007.41 | 3011.33 | 3013.30 | 3021.47 |
| 3030.22 | 3036.20 | 3044.27 | 3054.73 | 3077.25 | 3081.36 |
| 3082.06 | 3088.36 | 3096.92 | 3102.13 | 3103.30 | 3117.09 |
| 3121.79 | 3138.86 | 3140.94 | 3145.38 | 3151.23 | 3162.81 |
| 3174.89 | 3179.54 | 3184.43 | 3191.57 | 3206.24 | 3208.47 |

=====

4a

=====

|         |         |         |         |         |         |
|---------|---------|---------|---------|---------|---------|
| 2.90    | 12.87   | 17.00   | 33.90   | 49.62   | 51.79   |
| 63.91   | 70.90   | 76.58   | 78.53   | 105.35  | 107.57  |
| 124.09  | 127.44  | 133.04  | 145.90  | 150.71  | 162.49  |
| 183.98  | 200.41  | 209.43  | 226.58  | 237.90  | 243.28  |
| 249.42  | 261.73  | 275.67  | 300.51  | 307.01  | 327.61  |
| 329.95  | 362.38  | 386.08  | 402.01  | 417.29  | 425.68  |
| 453.28  | 465.98  | 480.14  | 499.64  | 514.60  | 518.21  |
| 524.36  | 529.66  | 546.21  | 566.20  | 603.39  | 627.86  |
| 643.12  | 678.37  | 695.11  | 702.16  | 727.34  | 753.82  |
| 768.26  | 780.66  | 794.53  | 804.02  | 825.82  | 837.75  |
| 842.59  | 849.73  | 856.71  | 871.27  | 890.27  | 919.64  |
| 938.28  | 970.48  | 975.69  | 976.03  | 1004.82 | 1011.03 |
| 1018.73 | 1032.50 | 1054.33 | 1071.16 | 1079.32 | 1104.54 |
| 1109.33 | 1111.13 | 1119.48 | 1125.41 | 1128.24 | 1130.35 |
| 1142.59 | 1156.25 | 1165.89 | 1169.64 | 1172.07 | 1174.24 |
| 1192.51 | 1194.00 | 1196.10 | 1197.19 | 1209.89 | 1221.80 |
| 1229.68 | 1271.40 | 1283.57 | 1300.83 | 1305.14 | 1311.04 |
| 1314.67 | 1320.61 | 1329.46 | 1334.81 | 1336.54 | 1343.48 |
| 1371.05 | 1393.58 | 1397.92 | 1418.66 | 1422.43 | 1450.69 |
| 1452.37 | 1457.19 | 1459.65 | 1463.16 | 1464.56 | 1466.04 |

|         |         |         |         |         |         |
|---------|---------|---------|---------|---------|---------|
| 1466.63 | 1467.06 | 1467.74 | 1470.63 | 1476.38 | 1477.75 |
| 1481.68 | 1483.88 | 1490.76 | 1503.04 | 1523.32 | 1564.75 |
| 1638.67 | 1648.32 | 1676.48 | 1686.63 | 1822.95 | 2592.95 |
| 2653.58 | 2753.31 | 3002.67 | 3005.52 | 3018.71 | 3029.16 |
| 3029.96 | 3042.54 | 3050.50 | 3059.11 | 3080.77 | 3090.35 |
| 3102.05 | 3108.02 | 3112.62 | 3121.66 | 3127.57 | 3130.47 |
| 3144.68 | 3151.72 | 3153.06 | 3173.09 | 3191.43 | 3196.43 |
| 3199.90 | 3211.11 | 3212.55 |         |         |         |

=====  
A1'-TS  
=====

|         |         |         |         |         |         |
|---------|---------|---------|---------|---------|---------|
| -191.01 | 16.20   | 42.44   | 43.26   | 63.91   | 69.40   |
| 77.73   | 82.81   | 87.63   | 97.62   | 110.49  | 119.43  |
| 130.58  | 187.13  | 193.87  | 242.21  | 254.10  | 316.81  |
| 356.91  | 385.13  | 400.09  | 445.51  | 449.28  | 459.33  |
| 505.35  | 556.30  | 654.42  | 671.33  | 749.40  | 762.54  |
| 805.11  | 822.18  | 851.14  | 852.23  | 908.13  | 959.71  |
| 998.68  | 1024.93 | 1036.65 | 1055.89 | 1061.75 | 1087.57 |
| 1112.14 | 1153.38 | 1156.74 | 1164.11 | 1171.93 | 1177.02 |
| 1178.33 | 1192.92 | 1228.05 | 1248.77 | 1268.14 | 1307.55 |
| 1362.59 | 1395.07 | 1434.96 | 1442.28 | 1444.35 | 1451.78 |
| 1452.13 | 1453.73 | 1460.69 | 1461.08 | 1464.55 | 1466.22 |
| 1471.28 | 1474.09 | 1520.86 | 1594.90 | 1660.09 | 3032.84 |
| 3044.34 | 3044.65 | 3048.52 | 3122.80 | 3133.29 | 3144.03 |
| 3154.93 | 3162.22 | 3183.96 | 3184.68 | 3187.57 | 3209.56 |
| 3211.25 | 3218.24 | 3230.51 |         |         |         |

=====  
A5  
=====

|         |         |         |         |         |         |
|---------|---------|---------|---------|---------|---------|
| 33.25   | 46.08   | 61.45   | 66.94   | 80.85   | 95.24   |
| 109.56  | 118.07  | 154.83  | 162.93  | 196.32  | 228.65  |
| 236.61  | 265.79  | 276.65  | 289.15  | 321.92  | 373.42  |
| 383.33  | 403.67  | 467.74  | 489.37  | 521.63  | 529.65  |
| 572.39  | 638.72  | 708.02  | 745.48  | 785.09  | 799.93  |
| 827.00  | 840.93  | 841.86  | 871.66  | 945.08  | 975.48  |
| 998.77  | 1010.15 | 1036.81 | 1068.49 | 1076.65 | 1090.36 |
| 1118.21 | 1149.57 | 1159.49 | 1160.20 | 1183.32 | 1191.65 |
| 1209.32 | 1226.62 | 1300.61 | 1324.33 | 1332.16 | 1340.44 |
| 1358.19 | 1369.23 | 1402.16 | 1429.41 | 1446.83 | 1453.71 |
| 1456.45 | 1458.22 | 1461.69 | 1464.61 | 1465.64 | 1497.47 |
| 1507.50 | 1516.84 | 1550.33 | 1561.81 | 1615.52 | 2047.73 |
| 2100.87 | 2155.32 | 3029.91 | 3043.49 | 3044.66 | 3048.09 |
| 3122.69 | 3149.55 | 3151.99 | 3161.09 | 3189.43 | 3191.58 |
| 3198.52 | 3203.27 | 3214.33 |         |         |         |

=====  
A6  
=====

|         |         |         |         |         |         |
|---------|---------|---------|---------|---------|---------|
| 15.24   | 54.51   | 55.34   | 59.30   | 81.45   | 90.70   |
| 107.31  | 112.81  | 133.82  | 158.27  | 175.43  | 189.92  |
| 206.50  | 211.77  | 256.33  | 286.69  | 300.97  | 325.17  |
| 360.41  | 385.27  | 408.23  | 444.07  | 473.89  | 506.06  |
| 536.36  | 581.09  | 639.95  | 700.39  | 729.71  | 754.73  |
| 786.92  | 851.51  | 898.28  | 914.77  | 930.61  | 993.83  |
| 1029.96 | 1046.73 | 1076.19 | 1100.11 | 1109.05 | 1130.45 |
| 1147.27 | 1168.90 | 1172.09 | 1174.36 | 1191.60 | 1193.66 |
| 1202.75 | 1226.25 | 1266.17 | 1310.45 | 1341.91 | 1391.85 |

|         |         |         |         |         |         |
|---------|---------|---------|---------|---------|---------|
| 1411.43 | 1432.34 | 1437.91 | 1446.16 | 1453.76 | 1454.25 |
| 1458.35 | 1465.21 | 1466.76 | 1475.03 | 1476.85 | 1478.98 |
| 1482.08 | 1501.23 | 1658.02 | 3005.72 | 3014.58 | 3019.59 |
| 3030.39 | 3079.18 | 3100.39 | 3110.65 | 3122.58 | 3128.13 |
| 3149.22 | 3152.71 | 3157.05 | 3176.18 | 3181.41 | 3207.84 |

=====

A2'-TS

=====

|          |         |         |         |         |         |
|----------|---------|---------|---------|---------|---------|
| -1537.91 | 15.17   | 16.25   | 18.66   | 20.22   | 31.33   |
| 39.28    | 46.32   | 54.30   | 67.58   | 73.47   | 76.63   |
| 79.89    | 87.39   | 89.98   | 95.09   | 108.12  | 112.83  |
| 117.95   | 122.57  | 124.36  | 137.81  | 140.99  | 152.58  |
| 160.71   | 170.52  | 177.86  | 193.17  | 204.33  | 225.98  |
| 233.66   | 236.28  | 249.07  | 253.35  | 265.36  | 302.14  |
| 322.43   | 325.32  | 356.90  | 384.96  | 394.10  | 398.00  |
| 417.73   | 425.78  | 427.01  | 465.37  | 490.99  | 497.79  |
| 517.34   | 534.85  | 548.60  | 585.06  | 624.53  | 642.69  |
| 702.22   | 707.62  | 739.28  | 754.52  | 775.20  | 780.74  |
| 806.96   | 811.78  | 817.71  | 825.67  | 838.89  | 856.48  |
| 864.35   | 885.69  | 923.74  | 971.05  | 976.41  | 987.07  |
| 1019.15  | 1050.85 | 1068.04 | 1080.22 | 1090.11 | 1109.61 |
| 1111.25  | 1112.22 | 1119.93 | 1122.82 | 1131.09 | 1135.40 |
| 1165.13  | 1166.24 | 1167.31 | 1167.39 | 1169.33 | 1171.33 |
| 1181.01  | 1182.40 | 1183.78 | 1187.14 | 1191.63 | 1195.08 |
| 1197.48  | 1210.43 | 1240.79 | 1257.65 | 1260.80 | 1293.51 |
| 1301.67  | 1308.95 | 1313.06 | 1323.62 | 1327.48 | 1328.72 |
| 1330.43  | 1351.31 | 1395.86 | 1407.16 | 1424.56 | 1432.06 |
| 1448.65  | 1452.02 | 1454.12 | 1456.40 | 1459.20 | 1459.69 |
| 1463.10  | 1464.85 | 1465.69 | 1467.13 | 1467.24 | 1471.14 |
| 1472.14  | 1474.81 | 1475.76 | 1476.63 | 1479.00 | 1481.98 |
| 1493.51  | 1565.25 | 1650.20 | 1688.24 | 1845.06 | 2989.77 |
| 3002.12  | 3007.08 | 3014.68 | 3021.54 | 3027.64 | 3028.77 |
| 3030.99  | 3033.80 | 3035.27 | 3070.44 | 3079.59 | 3090.62 |
| 3091.04  | 3093.36 | 3106.13 | 3110.72 | 3121.12 | 3127.01 |
| 3150.12  | 3151.30 | 3156.10 | 3158.94 | 3159.69 | 3195.34 |
| 3197.56  | 3212.08 | 3213.77 |         |         |         |

=====

5a

=====

|         |         |         |         |         |         |
|---------|---------|---------|---------|---------|---------|
| 15.44   | 16.86   | 22.14   | 35.29   | 49.80   | 66.89   |
| 75.34   | 82.97   | 99.27   | 101.64  | 111.04  | 114.88  |
| 122.75  | 134.27  | 153.43  | 164.62  | 185.09  | 188.51  |
| 214.87  | 224.82  | 229.56  | 253.46  | 269.70  | 301.26  |
| 325.40  | 327.08  | 362.05  | 387.43  | 400.51  | 426.05  |
| 463.89  | 487.95  | 496.62  | 517.52  | 521.71  | 550.08  |
| 623.56  | 642.54  | 691.90  | 702.04  | 733.09  | 766.48  |
| 778.43  | 786.87  | 810.69  | 826.06  | 832.93  | 855.93  |
| 861.29  | 883.18  | 919.03  | 969.83  | 976.73  | 995.19  |
| 1018.53 | 1043.01 | 1064.83 | 1080.22 | 1101.14 | 1110.50 |
| 1113.53 | 1114.68 | 1119.23 | 1135.54 | 1165.98 | 1166.10 |
| 1170.37 | 1172.02 | 1181.07 | 1187.52 | 1193.13 | 1195.75 |
| 1197.36 | 1204.60 | 1254.97 | 1266.77 | 1291.66 | 1301.03 |
| 1305.39 | 1319.44 | 1324.33 | 1329.82 | 1345.08 | 1349.09 |
| 1394.64 | 1403.46 | 1425.70 | 1430.06 | 1453.30 | 1458.65 |
| 1459.72 | 1465.18 | 1465.87 | 1467.05 | 1467.59 | 1470.81 |
| 1473.57 | 1475.88 | 1477.65 | 1481.91 | 1484.30 | 1497.48 |

|         |         |         |         |         |         |
|---------|---------|---------|---------|---------|---------|
| 1564.91 | 1649.19 | 1687.48 | 1843.46 | 2997.81 | 3002.41 |
| 3014.04 | 3020.33 | 3025.23 | 3030.59 | 3032.20 | 3040.46 |
| 3062.30 | 3071.06 | 3080.10 | 3083.30 | 3092.29 | 3102.88 |
| 3109.62 | 3124.77 | 3150.44 | 3153.53 | 3155.82 | 3195.33 |
| 3196.93 | 3210.96 | 3213.63 |         |         |         |

=====

**B1-TS**

=====

|         |         |         |         |         |         |
|---------|---------|---------|---------|---------|---------|
| -336.09 | 20.25   | 33.02   | 51.62   | 56.85   | 62.21   |
| 86.62   | 111.08  | 123.31  | 127.58  | 148.15  | 197.34  |
| 225.38  | 264.58  | 337.51  | 350.37  | 365.55  | 434.62  |
| 475.93  | 505.87  | 518.17  | 669.81  | 690.50  | 755.94  |
| 798.94  | 816.40  | 818.60  | 860.98  | 926.85  | 975.35  |
| 992.10  | 993.11  | 1041.86 | 1076.49 | 1081.83 | 1097.41 |
| 1106.17 | 1160.41 | 1173.26 | 1179.22 | 1186.87 | 1214.96 |
| 1242.25 | 1257.50 | 1320.69 | 1335.26 | 1397.52 | 1415.02 |
| 1449.92 | 1453.20 | 1459.55 | 1462.39 | 1463.07 | 1463.52 |
| 1475.27 | 1480.76 | 1511.68 | 1594.14 | 1632.83 | 3021.41 |
| 3029.26 | 3037.93 | 3114.90 | 3116.98 | 3121.07 | 3122.60 |
| 3139.74 | 3140.50 | 3151.66 | 3152.06 | 3181.28 | 3182.49 |

=====

**B2**

=====

|         |         |         |         |         |         |
|---------|---------|---------|---------|---------|---------|
| 43.05   | 50.84   | 73.59   | 86.71   | 102.00  | 107.15  |
| 121.78  | 128.01  | 167.48  | 209.29  | 227.28  | 242.44  |
| 282.78  | 301.51  | 352.10  | 391.28  | 437.50  | 481.53  |
| 495.58  | 515.79  | 580.52  | 655.49  | 714.18  | 764.30  |
| 791.45  | 806.95  | 832.00  | 858.02  | 904.21  | 967.91  |
| 976.43  | 1037.54 | 1041.29 | 1068.50 | 1108.05 | 1126.75 |
| 1130.02 | 1134.65 | 1168.82 | 1173.70 | 1192.80 | 1193.50 |
| 1217.45 | 1296.87 | 1319.22 | 1323.18 | 1369.85 | 1398.84 |
| 1412.23 | 1453.47 | 1456.01 | 1456.51 | 1458.94 | 1464.87 |
| 1467.04 | 1477.45 | 1482.79 | 1579.80 | 1621.94 | 3000.23 |
| 3031.17 | 3034.07 | 3036.26 | 3110.95 | 3113.42 | 3123.61 |
| 3134.81 | 3137.57 | 3155.28 | 3155.75 | 3175.38 | 3182.54 |

=====

**B2-TS**

=====

|         |         |         |         |         |         |
|---------|---------|---------|---------|---------|---------|
| -572.53 | 13.00   | 14.54   | 22.39   | 25.88   | 37.00   |
| 43.35   | 47.64   | 51.73   | 68.40   | 71.74   | 76.77   |
| 84.88   | 97.58   | 113.85  | 126.87  | 131.16  | 133.90  |
| 141.03  | 157.11  | 158.88  | 165.58  | 191.29  | 213.69  |
| 223.57  | 245.50  | 252.27  | 258.29  | 260.60  | 266.38  |
| 305.57  | 317.87  | 324.00  | 353.04  | 361.08  | 377.24  |
| 385.20  | 402.29  | 416.85  | 426.98  | 466.94  | 484.39  |
| 499.13  | 510.59  | 510.78  | 520.62  | 534.78  | 600.48  |
| 630.54  | 643.51  | 669.73  | 697.45  | 703.35  | 722.54  |
| 735.40  | 780.69  | 785.70  | 788.84  | 798.48  | 811.69  |
| 818.06  | 828.50  | 830.88  | 856.46  | 858.41  | 870.38  |
| 890.67  | 893.87  | 957.68  | 968.31  | 971.94  | 976.95  |
| 978.30  | 998.93  | 1009.69 | 1014.74 | 1036.25 | 1044.94 |
| 1070.90 | 1078.35 | 1088.77 | 1088.88 | 1097.76 | 1106.63 |
| 1109.49 | 1121.21 | 1136.46 | 1146.36 | 1159.23 | 1167.01 |
| 1168.73 | 1171.60 | 1176.19 | 1183.50 | 1193.52 | 1196.46 |
| 1197.87 | 1211.86 | 1227.11 | 1236.15 | 1239.87 | 1288.01 |
| 1296.58 | 1302.06 | 1304.03 | 1314.94 | 1326.70 | 1328.15 |

|         |         |         |         |         |         |
|---------|---------|---------|---------|---------|---------|
| 1334.33 | 1338.65 | 1345.12 | 1390.71 | 1398.43 | 1407.19 |
| 1407.84 | 1415.57 | 1424.98 | 1451.59 | 1454.86 | 1455.55 |
| 1458.50 | 1460.22 | 1461.97 | 1463.71 | 1466.19 | 1466.26 |
| 1467.76 | 1473.15 | 1478.05 | 1478.64 | 1479.85 | 1482.32 |
| 1506.78 | 1562.44 | 1588.67 | 1624.76 | 1644.13 | 1684.90 |
| 1822.24 | 2976.47 | 2994.66 | 3011.75 | 3013.58 | 3020.06 |
| 3020.64 | 3028.52 | 3038.82 | 3049.89 | 3071.78 | 3088.27 |
| 3096.27 | 3099.50 | 3103.24 | 3109.24 | 3109.56 | 3118.44 |
| 3118.74 | 3120.89 | 3143.64 | 3147.93 | 3151.13 | 3154.96 |
| 3164.41 | 3173.03 | 3183.40 | 3187.74 | 3204.62 | 3207.01 |

=====

B3

=====

|         |         |         |         |         |         |
|---------|---------|---------|---------|---------|---------|
| 4.56    | 12.87   | 26.50   | 32.17   | 38.37   | 44.18   |
| 65.97   | 67.19   | 77.34   | 79.98   | 90.03   | 101.62  |
| 112.22  | 127.80  | 135.67  | 150.17  | 164.94  | 176.27  |
| 193.54  | 198.47  | 203.84  | 213.32  | 234.96  | 249.13  |
| 253.22  | 265.11  | 293.55  | 301.95  | 307.88  | 323.44  |
| 336.61  | 357.65  | 371.46  | 394.99  | 407.04  | 413.79  |
| 426.81  | 444.51  | 465.71  | 490.00  | 504.11  | 516.05  |
| 522.56  | 531.27  | 544.83  | 559.56  | 611.88  | 629.80  |
| 642.65  | 666.13  | 702.47  | 711.29  | 731.60  | 738.53  |
| 747.69  | 780.09  | 791.61  | 803.30  | 816.28  | 821.43  |
| 825.48  | 833.63  | 838.39  | 856.41  | 864.34  | 881.40  |
| 903.13  | 946.47  | 970.22  | 975.95  | 986.64  | 990.13  |
| 1015.86 | 1035.94 | 1039.64 | 1045.73 | 1069.45 | 1085.86 |
| 1095.64 | 1110.13 | 1110.41 | 1118.58 | 1119.94 | 1135.46 |
| 1148.31 | 1157.33 | 1163.05 | 1164.70 | 1165.74 | 1175.07 |
| 1176.88 | 1178.65 | 1179.61 | 1197.12 | 1197.69 | 1198.98 |
| 1200.58 | 1216.35 | 1233.26 | 1262.76 | 1274.47 | 1287.32 |
| 1300.97 | 1304.51 | 1314.88 | 1322.38 | 1329.25 | 1335.19 |
| 1336.72 | 1339.54 | 1354.25 | 1388.68 | 1394.35 | 1400.62 |
| 1409.82 | 1423.16 | 1428.09 | 1455.02 | 1459.24 | 1459.45 |
| 1462.04 | 1465.47 | 1467.08 | 1469.55 | 1471.34 | 1475.17 |
| 1478.09 | 1481.47 | 1482.17 | 1482.37 | 1484.17 | 1501.09 |
| 1507.04 | 1564.34 | 1587.90 | 1613.18 | 1648.45 | 1686.82 |
| 1824.76 | 2336.39 | 2455.57 | 2579.53 | 2937.09 | 2994.03 |
| 2999.79 | 3001.78 | 3002.96 | 3017.13 | 3032.94 | 3042.71 |
| 3050.21 | 3078.01 | 3080.54 | 3080.95 | 3090.69 | 3093.93 |
| 3094.50 | 3117.86 | 3118.00 | 3120.04 | 3123.30 | 3151.39 |
| 3151.67 | 3174.31 | 3189.47 | 3196.24 | 3211.24 | 3212.43 |

=====

C1

=====

|        |        |        |        |        |        |
|--------|--------|--------|--------|--------|--------|
| 4.19   | 13.60  | 17.67  | 24.95  | 27.66  | 39.10  |
| 45.28  | 55.28  | 64.05  | 72.22  | 77.29  | 84.45  |
| 89.56  | 97.21  | 102.36 | 109.19 | 120.22 | 130.22 |
| 135.16 | 148.94 | 161.56 | 167.26 | 189.65 | 195.09 |
| 206.08 | 208.45 | 227.48 | 239.92 | 247.45 | 249.86 |
| 263.63 | 287.95 | 310.44 | 314.10 | 316.25 | 328.51 |
| 354.03 | 373.23 | 376.19 | 381.49 | 403.29 | 414.19 |
| 427.96 | 453.15 | 470.12 | 485.51 | 491.97 | 514.35 |
| 521.01 | 539.79 | 560.62 | 579.31 | 609.01 | 625.00 |
| 640.08 | 690.28 | 700.99 | 705.13 | 720.90 | 736.97 |
| 748.41 | 778.35 | 779.54 | 783.92 | 796.63 | 818.62 |
| 824.96 | 828.72 | 856.52 | 860.27 | 864.94 | 877.72 |

|         |         |         |         |         |         |
|---------|---------|---------|---------|---------|---------|
| 909.19  | 915.38  | 970.12  | 977.76  | 981.02  | 1004.73 |
| 1009.39 | 1020.58 | 1041.33 | 1045.93 | 1048.67 | 1067.34 |
| 1074.14 | 1091.40 | 1107.81 | 1109.31 | 1115.98 | 1118.62 |
| 1130.92 | 1139.28 | 1152.42 | 1157.87 | 1165.74 | 1167.68 |
| 1170.87 | 1172.73 | 1175.45 | 1179.17 | 1187.29 | 1189.56 |
| 1196.01 | 1196.63 | 1200.49 | 1207.28 | 1220.24 | 1238.91 |
| 1270.41 | 1283.10 | 1299.62 | 1301.05 | 1309.69 | 1315.10 |
| 1317.87 | 1326.86 | 1332.98 | 1341.07 | 1351.15 | 1362.25 |
| 1385.51 | 1394.64 | 1403.43 | 1408.16 | 1422.69 | 1429.12 |
| 1439.39 | 1449.27 | 1452.45 | 1453.16 | 1458.31 | 1458.67 |
| 1461.16 | 1465.29 | 1465.98 | 1466.14 | 1466.86 | 1467.97 |
| 1471.34 | 1476.47 | 1477.66 | 1478.66 | 1481.69 | 1482.39 |
| 1485.88 | 1563.53 | 1645.56 | 1648.92 | 1686.59 | 1727.70 |
| 1832.52 | 2960.21 | 3002.38 | 3005.34 | 3013.85 | 3022.44 |
| 3027.69 | 3030.27 | 3033.76 | 3034.91 | 3043.67 | 3045.85 |
| 3077.39 | 3080.11 | 3088.80 | 3092.95 | 3094.97 | 3098.81 |
| 3109.65 | 3119.03 | 3120.19 | 3129.67 | 3141.56 | 3150.25 |
| 3150.53 | 3153.30 | 3167.16 | 3195.02 | 3196.24 | 3196.48 |
| 3210.43 | 3212.76 | 3213.88 |         |         |         |

=====  
C1a-TS  
=====

|         |         |         |         |         |         |
|---------|---------|---------|---------|---------|---------|
| -799.11 | 1.47    | 7.69    | 13.49   | 37.71   | 41.86   |
| 45.41   | 55.83   | 62.88   | 73.57   | 84.27   | 87.63   |
| 97.73   | 102.01  | 111.10  | 117.02  | 126.53  | 128.90  |
| 131.63  | 144.77  | 149.99  | 156.46  | 163.46  | 172.19  |
| 177.66  | 189.45  | 193.52  | 211.48  | 214.79  | 234.49  |
| 252.76  | 260.47  | 271.03  | 278.61  | 298.70  | 304.05  |
| 320.68  | 325.08  | 345.68  | 361.21  | 373.22  | 394.70  |
| 410.32  | 426.49  | 440.33  | 468.09  | 481.60  | 499.05  |
| 508.85  | 519.48  | 525.49  | 551.75  | 556.38  | 598.25  |
| 626.27  | 638.13  | 643.27  | 703.04  | 712.87  | 728.65  |
| 745.68  | 773.34  | 780.78  | 783.63  | 797.16  | 827.97  |
| 838.32  | 846.02  | 857.69  | 859.90  | 868.28  | 878.61  |
| 891.17  | 918.07  | 961.32  | 966.45  | 976.45  | 977.84  |
| 994.36  | 1009.94 | 1022.45 | 1034.58 | 1049.78 | 1054.48 |
| 1067.98 | 1083.09 | 1103.07 | 1104.38 | 1107.20 | 1113.53 |
| 1120.65 | 1121.10 | 1133.00 | 1141.82 | 1151.76 | 1154.89 |
| 1167.88 | 1170.30 | 1173.33 | 1174.19 | 1176.79 | 1185.10 |
| 1190.95 | 1195.67 | 1198.61 | 1198.72 | 1208.33 | 1238.82 |
| 1253.42 | 1270.70 | 1280.83 | 1300.64 | 1305.67 | 1316.30 |
| 1325.00 | 1328.71 | 1335.06 | 1340.24 | 1349.31 | 1352.76 |
| 1379.27 | 1386.68 | 1391.99 | 1393.77 | 1421.17 | 1423.45 |
| 1427.43 | 1439.54 | 1451.13 | 1453.14 | 1458.37 | 1458.57 |
| 1459.72 | 1460.98 | 1464.54 | 1465.58 | 1466.64 | 1466.85 |
| 1467.53 | 1470.96 | 1472.05 | 1476.79 | 1480.06 | 1482.23 |
| 1484.54 | 1544.77 | 1561.79 | 1642.27 | 1668.13 | 1683.19 |
| 1813.37 | 2228.80 | 2872.88 | 2939.94 | 2962.94 | 2988.34 |
| 2993.13 | 3010.32 | 3025.71 | 3030.68 | 3031.58 | 3048.42 |
| 3049.15 | 3056.62 | 3070.62 | 3076.03 | 3091.30 | 3107.28 |
| 3107.84 | 3117.32 | 3122.70 | 3130.38 | 3136.72 | 3144.59 |
| 3149.68 | 3152.49 | 3152.94 | 3157.21 | 3167.53 | 3175.54 |
| 3184.44 | 3206.35 | 3208.59 |         |         |         |

=====  
C1b-TS  
=====



|         |         |         |         |         |         |
|---------|---------|---------|---------|---------|---------|
| -249.12 | 9.19    | 9.79    | 17.54   | 26.34   | 33.44   |
| 38.95   | 47.19   | 62.62   | 70.33   | 82.44   | 88.80   |
| 93.29   | 100.80  | 103.03  | 109.05  | 122.02  | 124.39  |
| 134.11  | 146.40  | 153.64  | 168.22  | 171.60  | 191.43  |
| 209.66  | 220.10  | 228.50  | 235.84  | 244.98  | 256.09  |
| 259.34  | 278.68  | 294.46  | 310.32  | 318.43  | 326.30  |
| 343.98  | 366.57  | 379.19  | 390.81  | 395.96  | 416.05  |
| 424.88  | 429.71  | 461.59  | 471.96  | 488.39  | 508.09  |
| 512.41  | 517.53  | 528.13  | 550.80  | 568.73  | 607.70  |
| 628.68  | 643.97  | 694.04  | 701.48  | 728.50  | 736.78  |
| 779.30  | 782.26  | 788.29  | 791.62  | 823.69  | 827.78  |
| 845.56  | 853.29  | 857.45  | 869.15  | 872.64  | 885.07  |
| 896.96  | 944.64  | 951.33  | 971.99  | 977.44  | 985.40  |
| 1010.33 | 1021.26 | 1034.24 | 1045.81 | 1052.98 | 1058.61 |
| 1065.77 | 1070.94 | 1084.41 | 1106.51 | 1107.30 | 1113.71 |
| 1118.49 | 1120.64 | 1131.53 | 1141.20 | 1154.13 | 1159.14 |
| 1166.38 | 1169.36 | 1172.99 | 1174.24 | 1175.65 | 1189.68 |
| 1195.49 | 1197.67 | 1203.15 | 1213.36 | 1238.62 | 1247.02 |
| 1263.34 | 1268.82 | 1297.98 | 1302.01 | 1312.29 | 1317.52 |
| 1322.82 | 1329.52 | 1334.44 | 1341.55 | 1347.59 | 1359.07 |
| 1367.02 | 1374.29 | 1390.46 | 1392.59 | 1402.34 | 1402.82 |
| 1423.22 | 1429.74 | 1452.62 | 1453.75 | 1458.19 | 1458.70 |
| 1460.46 | 1464.18 | 1464.49 | 1465.51 | 1466.66 | 1467.96 |
| 1471.02 | 1476.94 | 1477.93 | 1480.21 | 1482.28 | 1494.31 |
| 1524.44 | 1540.39 | 1563.94 | 1646.43 | 1685.27 | 1699.02 |
| 1820.41 | 2295.87 | 2835.75 | 2912.70 | 2999.87 | 3012.20 |
| 3014.72 | 3021.24 | 3023.82 | 3031.31 | 3034.29 | 3034.84 |
| 3043.39 | 3050.07 | 3075.03 | 3077.80 | 3094.93 | 3097.29 |
| 3098.19 | 3110.16 | 3122.70 | 3123.05 | 3135.43 | 3149.68 |
| 3149.78 | 3151.90 | 3155.60 | 3158.11 | 3178.86 | 3191.21 |
| 3192.68 | 3206.58 | 3209.70 |         |         |         |

=====  
C2b  
=====

|         |         |         |         |         |         |
|---------|---------|---------|---------|---------|---------|
| 10.86   | 16.28   | 19.85   | 33.52   | 42.17   | 44.61   |
| 54.45   | 67.00   | 73.96   | 86.05   | 92.60   | 99.36   |
| 104.87  | 106.92  | 115.75  | 129.10  | 136.14  | 144.50  |
| 165.41  | 187.24  | 198.90  | 210.89  | 215.71  | 218.91  |
| 234.96  | 253.26  | 259.58  | 263.84  | 293.60  | 311.19  |
| 316.82  | 327.59  | 345.42  | 358.26  | 372.18  | 388.16  |
| 416.17  | 426.52  | 433.17  | 458.40  | 469.70  | 474.54  |
| 494.12  | 513.34  | 519.88  | 528.69  | 556.92  | 583.47  |
| 628.98  | 642.15  | 675.51  | 703.01  | 724.60  | 735.37  |
| 750.08  | 780.50  | 784.97  | 790.66  | 818.14  | 827.75  |
| 844.48  | 853.29  | 858.40  | 861.87  | 868.47  | 886.41  |
| 892.77  | 907.01  | 969.24  | 972.55  | 977.79  | 979.92  |
| 996.36  | 1012.44 | 1023.16 | 1035.08 | 1051.23 | 1057.90 |
| 1066.35 | 1070.71 | 1087.57 | 1107.37 | 1114.20 | 1120.71 |
| 1122.92 | 1134.46 | 1142.54 | 1159.48 | 1167.31 | 1170.31 |
| 1174.04 | 1176.36 | 1179.37 | 1189.81 | 1194.05 | 1195.99 |
| 1198.18 | 1201.55 | 1217.41 | 1237.44 | 1268.49 | 1277.70 |
| 1301.56 | 1302.52 | 1313.17 | 1316.28 | 1325.24 | 1328.56 |
| 1337.52 | 1340.19 | 1349.78 | 1365.28 | 1388.31 | 1391.64 |
| 1398.44 | 1404.33 | 1418.75 | 1422.38 | 1430.36 | 1439.94 |
| 1452.66 | 1452.79 | 1458.32 | 1459.44 | 1461.18 | 1465.46 |
| 1466.26 | 1466.59 | 1468.03 | 1468.41 | 1471.29 | 1477.20 |

1478.28 1482.47 1483.45 1563.10 1644.89 1685.42  
1752.58 1788.73 1819.76 2975.70 2991.82 2995.29  
3010.17 3011.55 3012.57 3024.51 3027.10 3032.91  
3036.12 3041.27 3045.49 3068.66 3072.45 3080.26  
3084.54 3093.59 3100.97 3107.54 3118.11 3123.26  
3130.90 3132.19 3147.24 3151.34 3152.33 3186.93  
3188.41 3204.99 3208.59

## VII. References

- (1) Parr, R.G.; Yang, W. *Density Functional Theory of Atoms and Molecules*. Oxford University Press: New York, **1989**.
- (2) Bochevarov, A.D.; Harder, E. ; Hughes, T. F. ; Greenwood, J. R. ; Braden, D. A. ; Philipp, D. M. ; Rinaldo, D. ; Halls, M. D. ; Zhang, J. ; Friesner, R. *Int. J. Quantum Chem.* **2013**, *113*, 2110.
- (3) Zhao, Y.; Truhlar, D. G. *Theor. Chem. Acc.* **2008**, *120*, 215
- (4) Grimme, S.; Antony, J.; Ehrlich, S.; Krieg, S. *J. Chem. Phys.* **2010**, *132*, 154104
- (5) Dunning, T.H., Jr. *J. Chem. Phys.* **1989**, *90*, 1007.
- (6) Marten, B.; Kim, K.; Cortis, C.; Friesner, R. A.; Murphy, R. B.; Ringnalda, M. N.; Sitkoff, D.; Honig, B. *J. Phys. Chem.* **1996**, *100*, 11775.
- (7) Friedrichs, M.; Zhou, R.H.; Edinger, S.R.; Friesner, R.A. *J. Phys. Chem. B* **1999**, *103*, 3057.
- (8) Edinger, S.R.; Cortis, C.; Shenkin, P.S.; Friesner, R.A. *J. Phys. Chem. B* **1997**, *101*, 1190.
- (9) Rashin, A.A.; Honig, B. *J. Phys. Chem.* **1985**, *89*, 5588.

# *Appendix I*

**Spectral Copies of  $^1\text{H}$ ,  $^{13}\text{C}$  and  $^{31}\text{P}$  NMR Data  
Obtained in this Study**

### 5-(dimethoxyphosphoryl)-4-(4-methylpyridin-2-yl)pentyl 4-methoxybenzoate (4a).

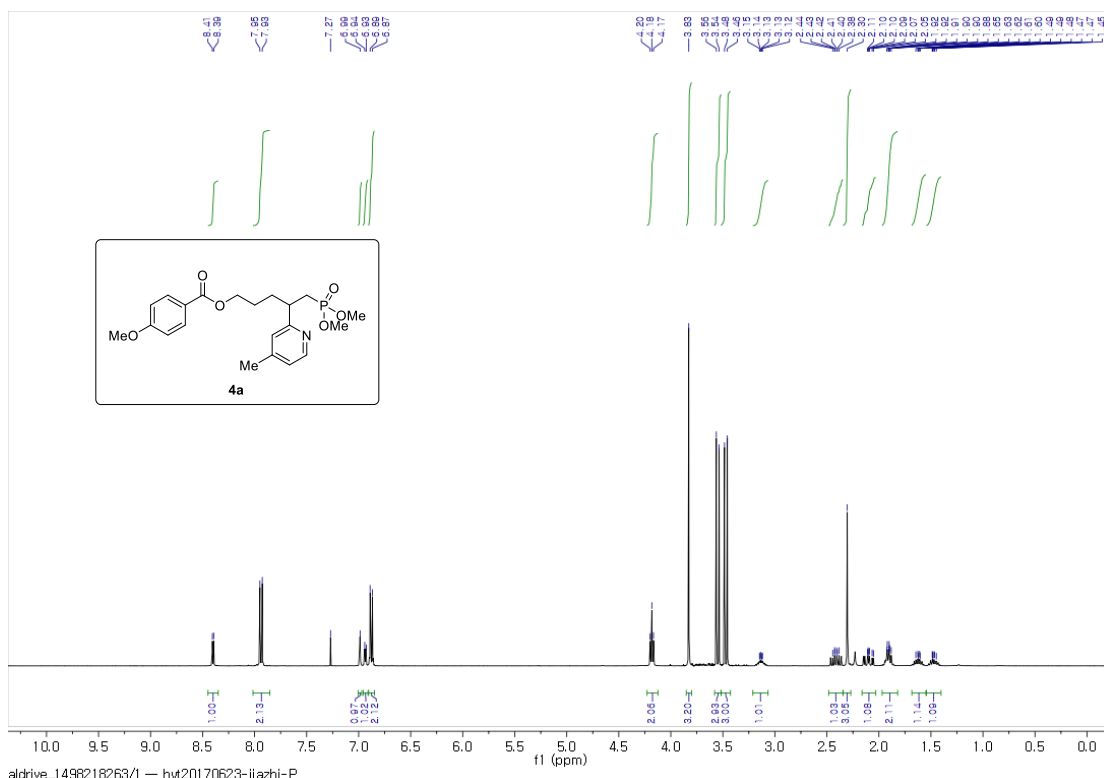

### 400 MHz, <sup>1</sup>H NMR in CDCl<sub>3</sub>

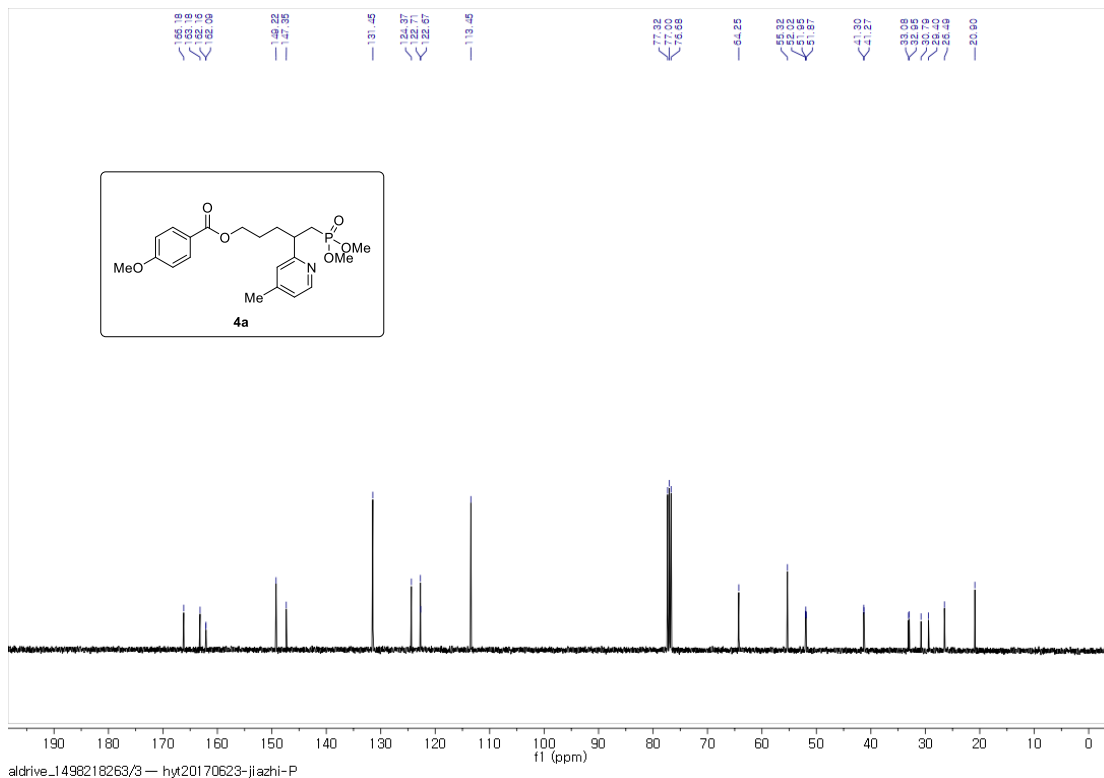

### 100 MHz, <sup>13</sup>C NMR in CDCl<sub>3</sub>

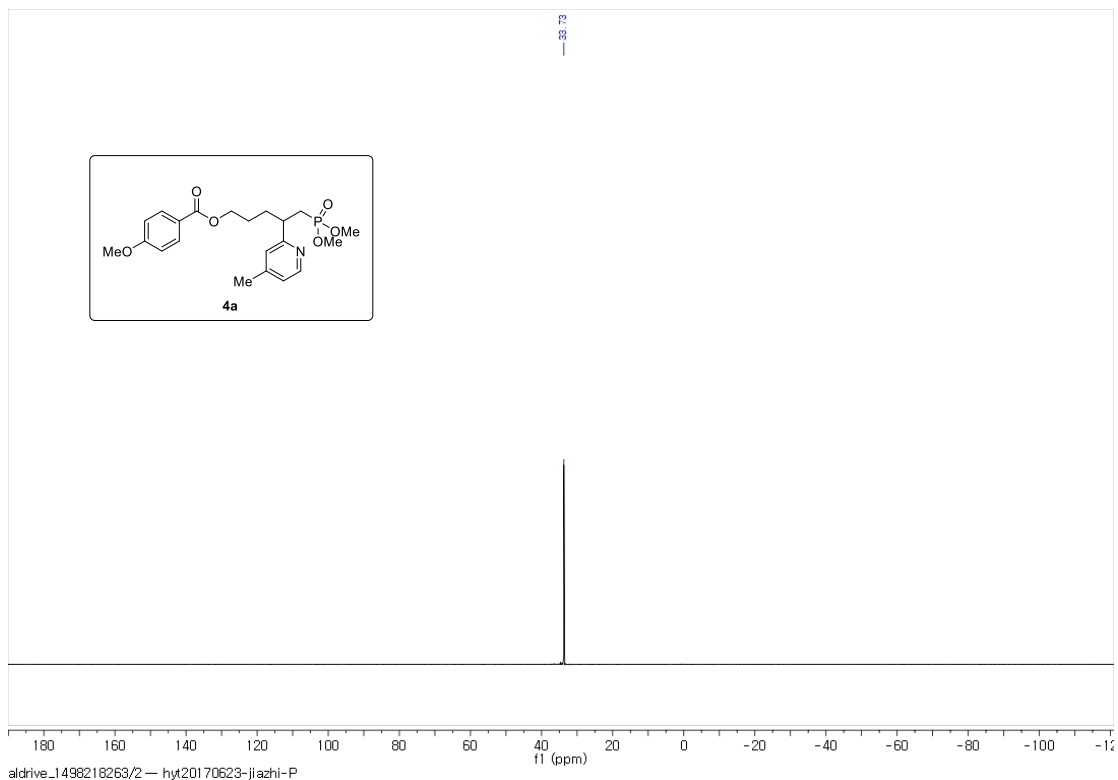

**162 MHz,  $^{31}\text{P}$  NMR in  $\text{CDCl}_3$**

### 5-(dimethoxyphosphoryl)-4-(4-phenylpyridin-2-yl)pentyl 4-methoxybenzoate (4b)

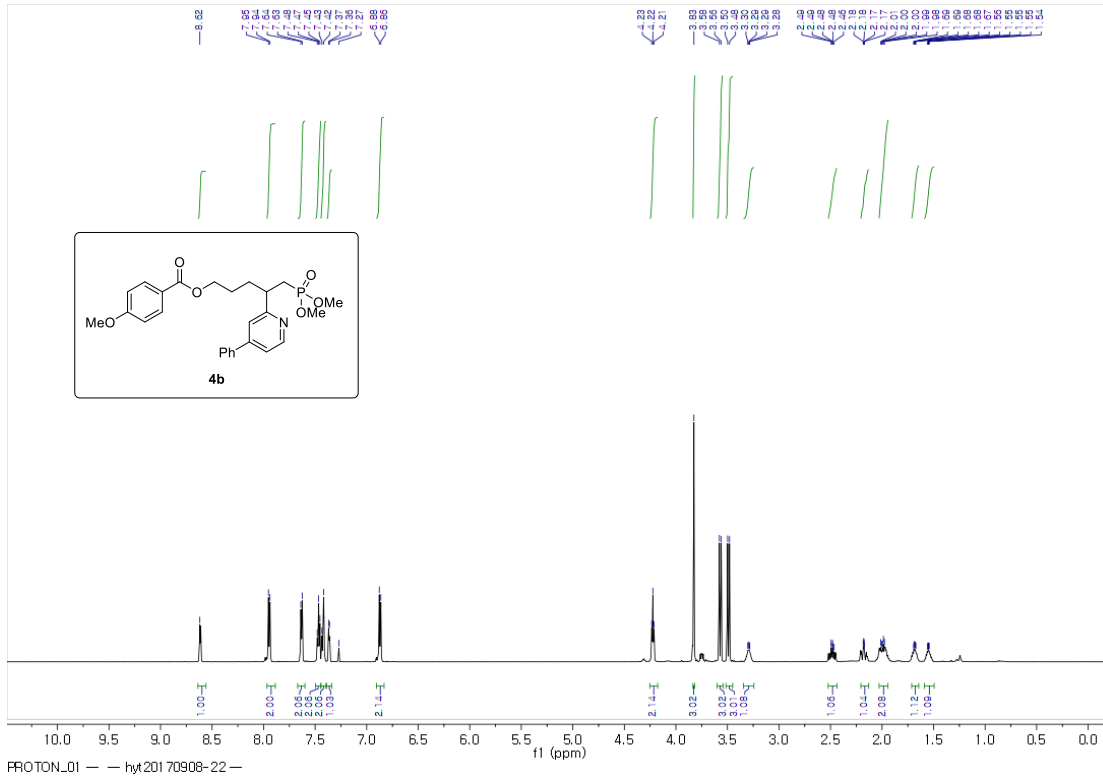

### 600 MHz, <sup>1</sup>H NMR in CDCl<sub>3</sub>

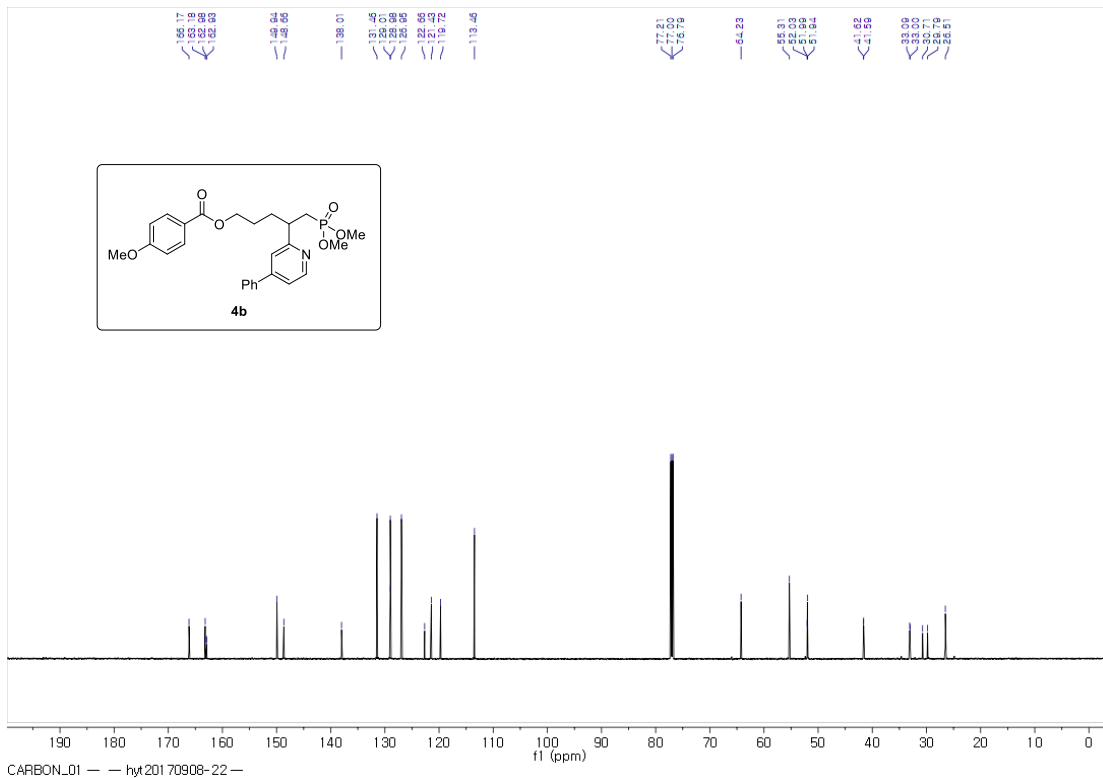

### 150 MHz, <sup>13</sup>C NMR in CDCl<sub>3</sub>

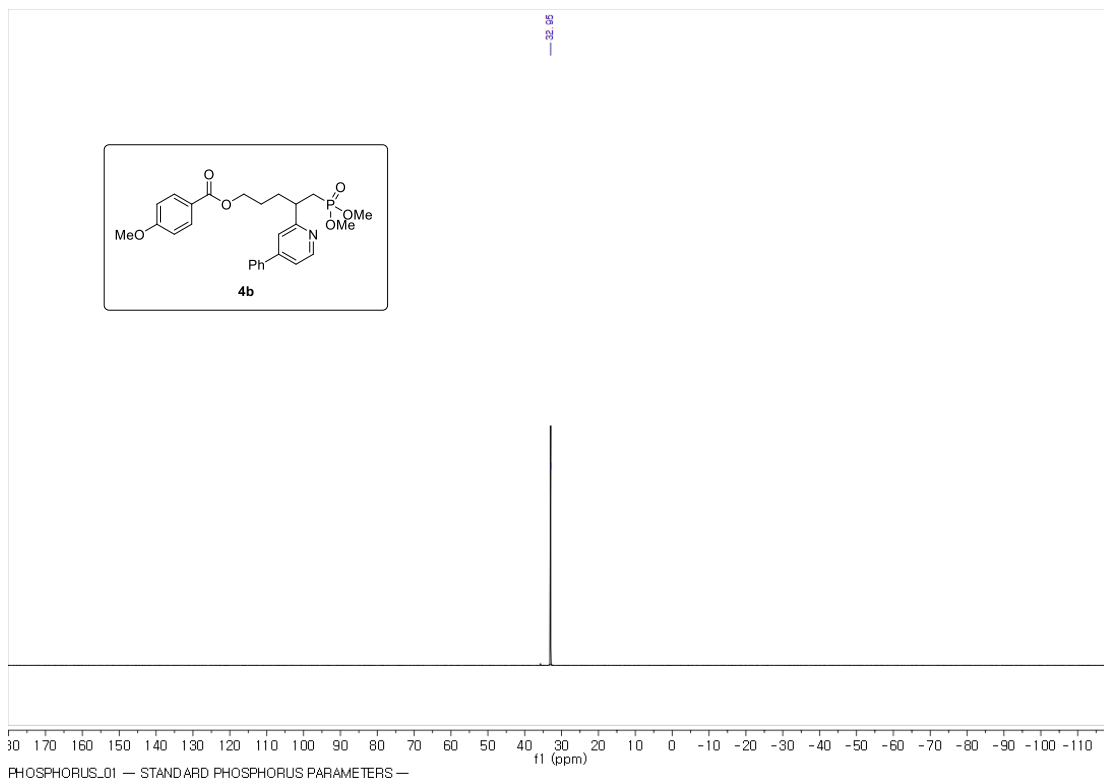

**243 MHz, <sup>31</sup>P NMR in CDCl<sub>3</sub>**

**4-(4-chloropyridin-2-yl)-5-(dimethoxyphosphoryl)pentyl 4-methoxybenzoate (4c)**

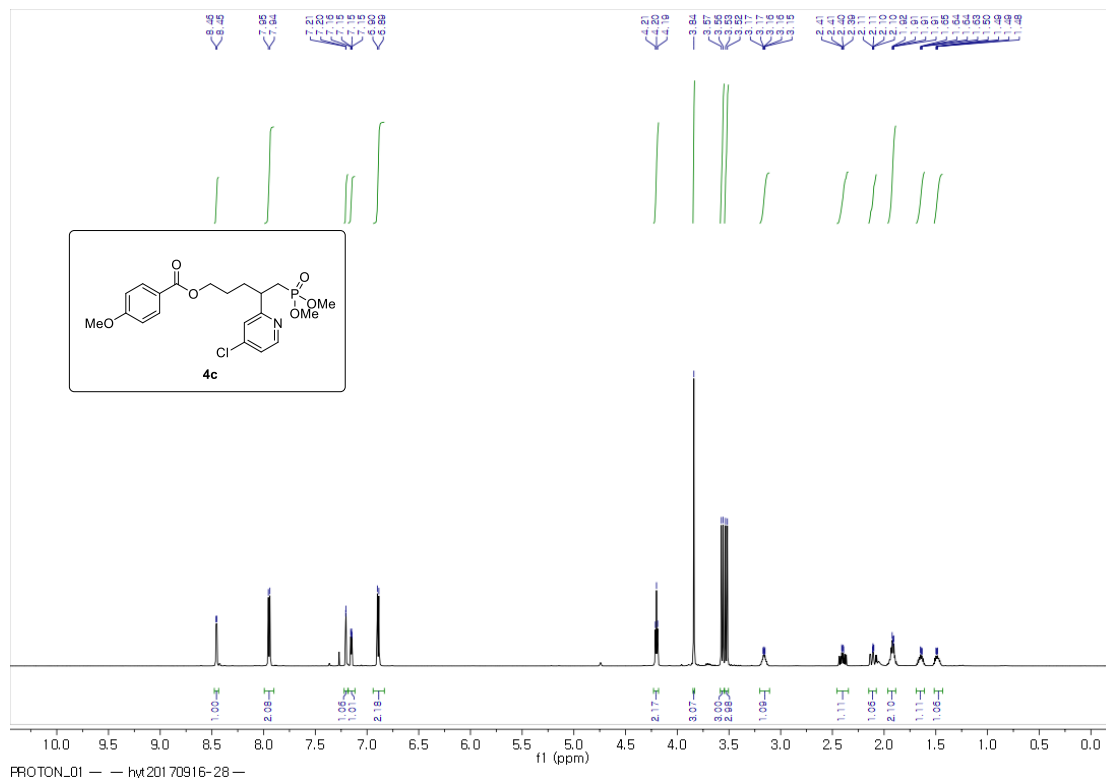

**600 MHz, <sup>1</sup>H NMR in CDCl<sub>3</sub>**

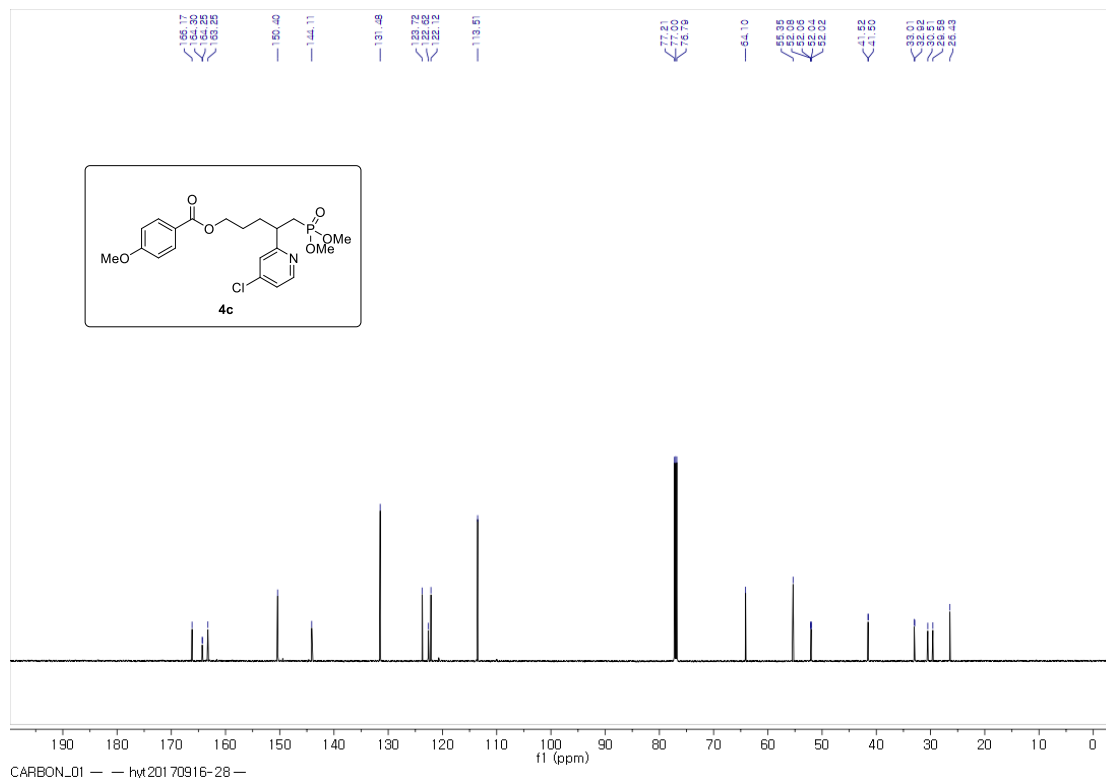

**150 MHz, <sup>13</sup>C NMR in CDCl<sub>3</sub>**



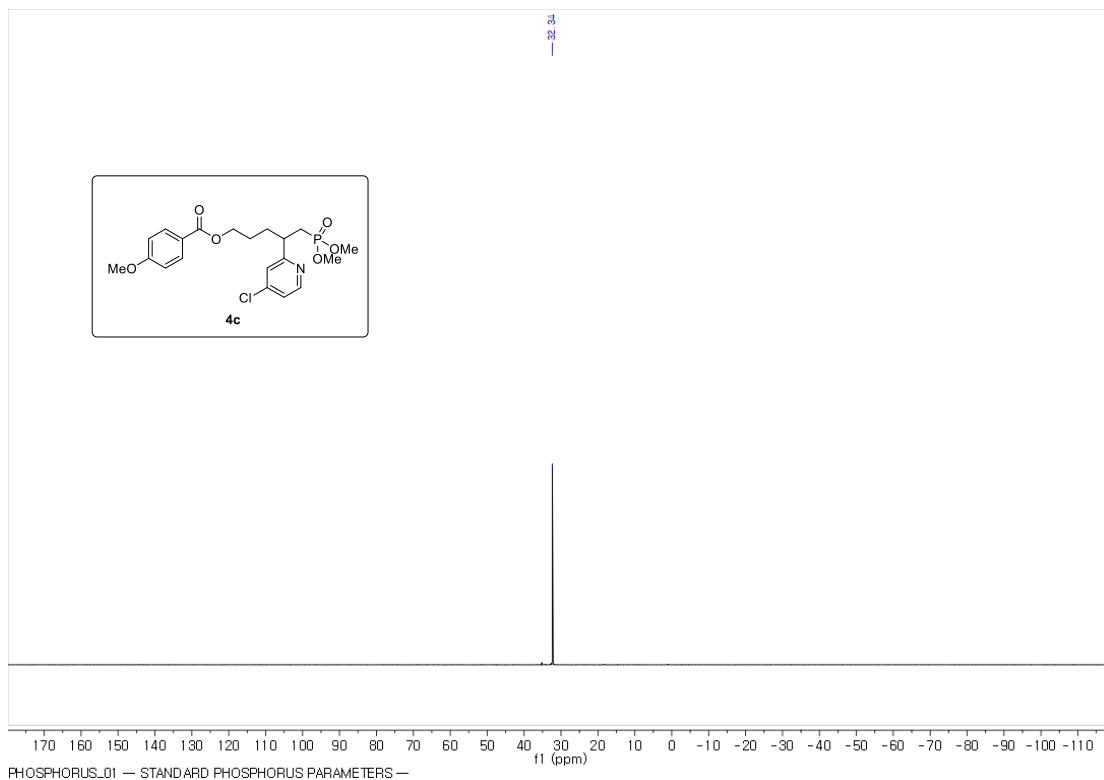

243 MHz,  $^{31}\text{P}$  NMR in  $\text{CDCl}_3$

**4-(4-acetylpyridin-2-yl)-5-(dimethoxyphosphoryl)pentyl 4-methoxybenzoate (4d)**

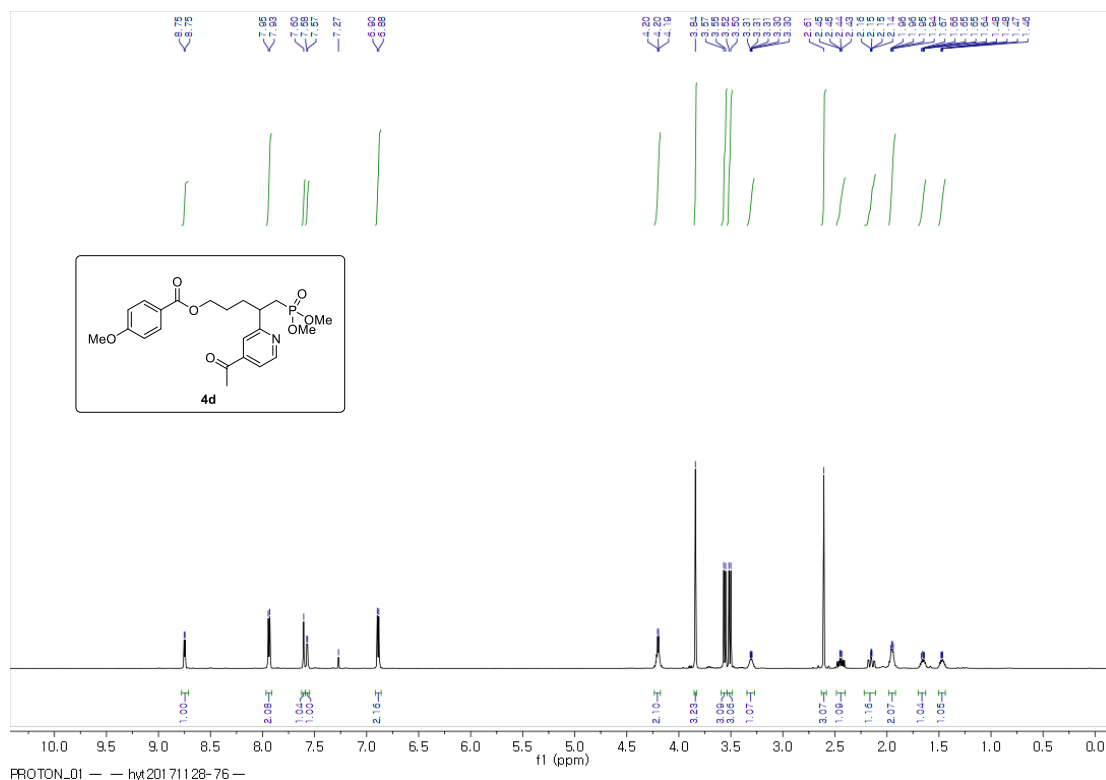

**600 MHz, <sup>1</sup>H NMR in CDCl<sub>3</sub>**

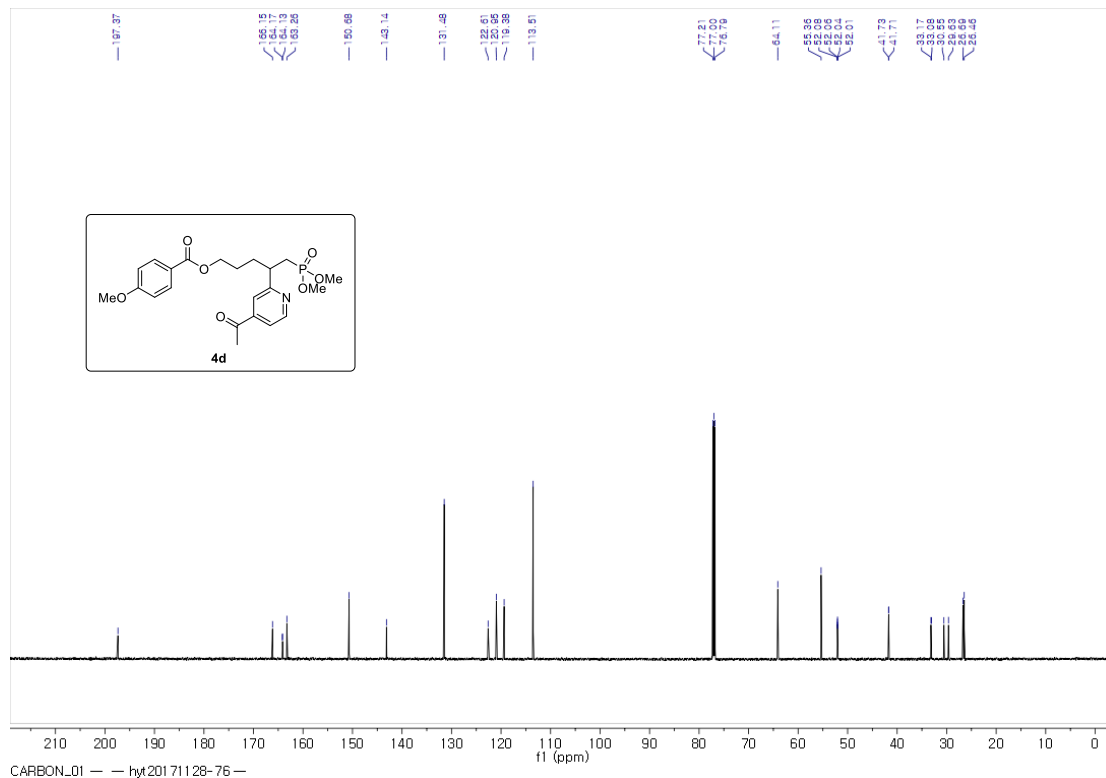

**150 MHz, <sup>13</sup>C NMR in CDCl<sub>3</sub>**

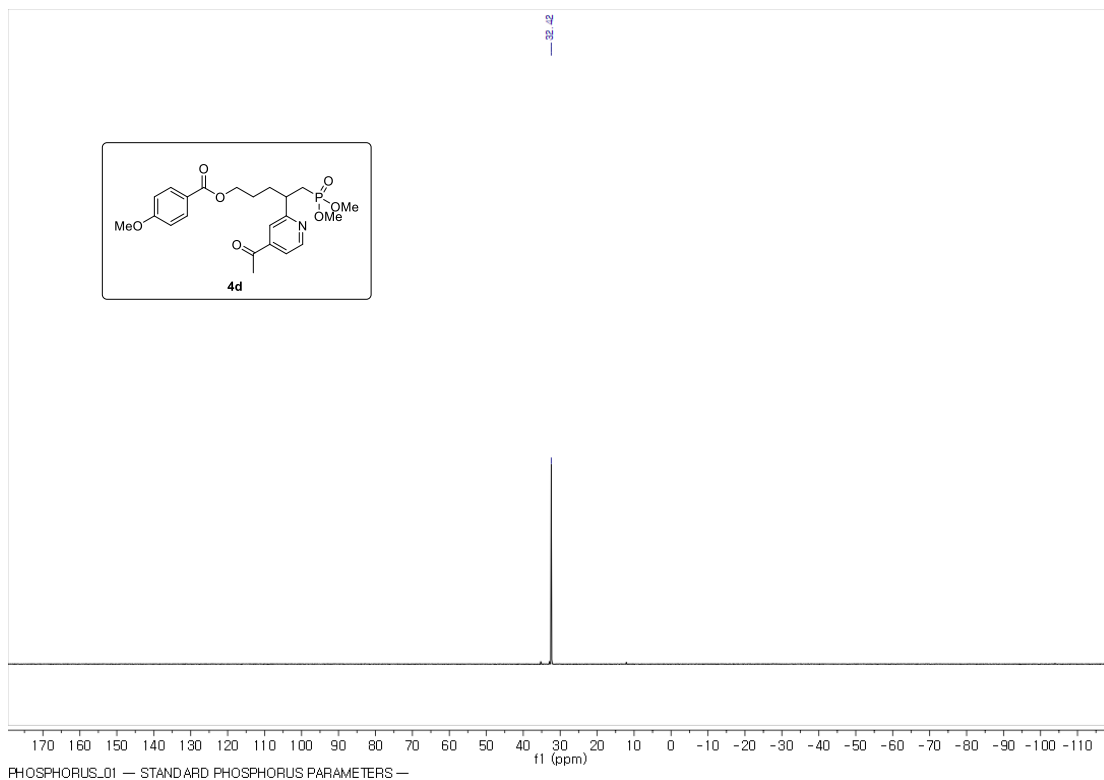

243 MHz,  $^{31}\text{P}$  NMR in  $\text{CDCl}_3$

**5-(dimethoxyphosphoryl)-4-(4-(trifluoromethyl)pyridin-2-yl)pentyl 4-methoxybenzoate (4e)**

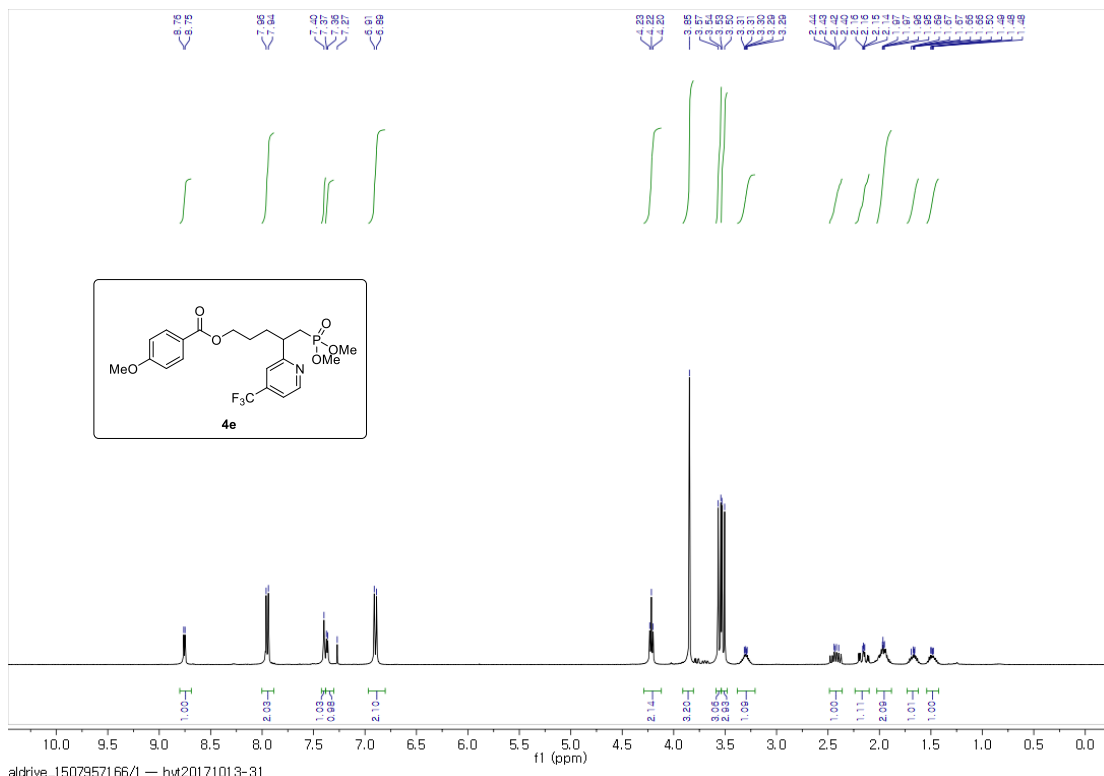

**400 MHz, <sup>1</sup>H NMR in CDCl<sub>3</sub>**

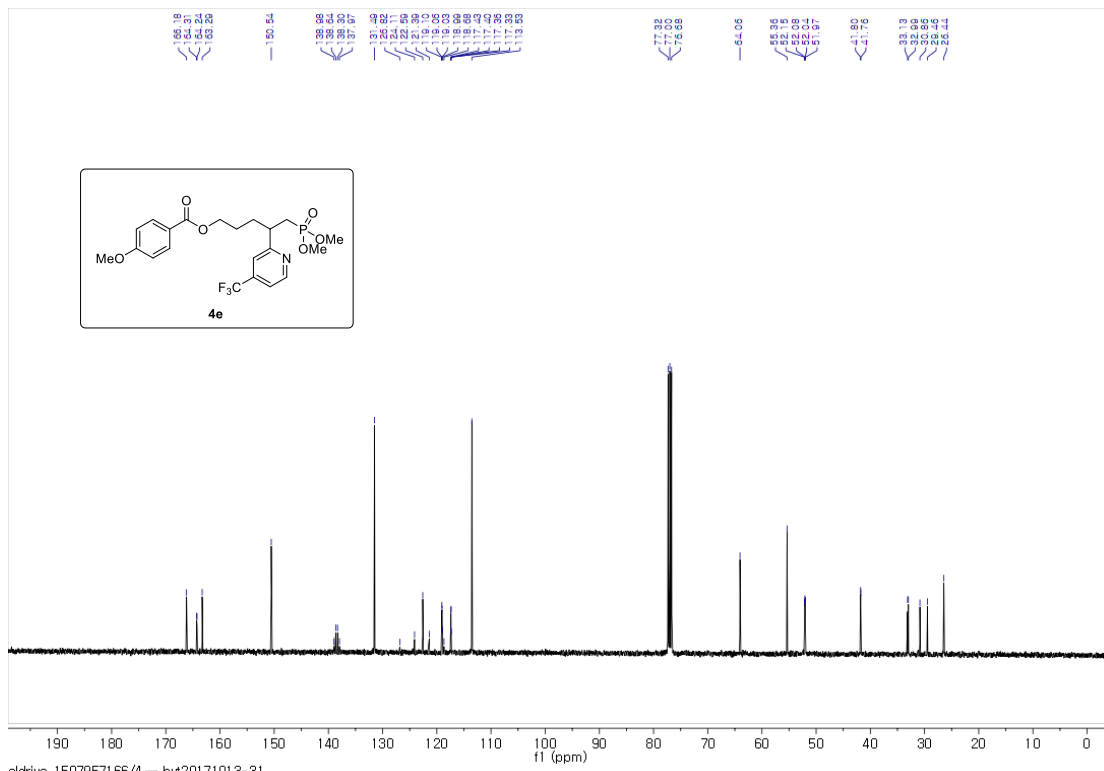

**100 MHz, <sup>13</sup>C NMR in CDCl<sub>3</sub>**

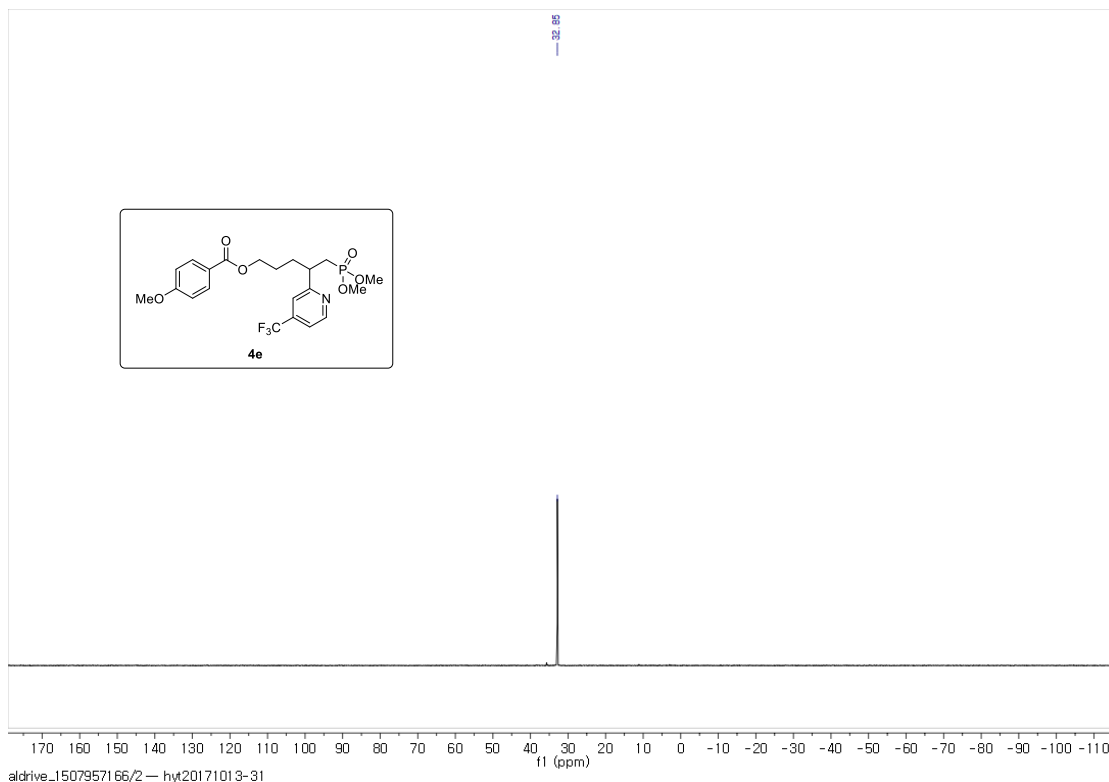

162 MHz,  $^{31}\text{P}$  NMR in  $\text{CDCl}_3$

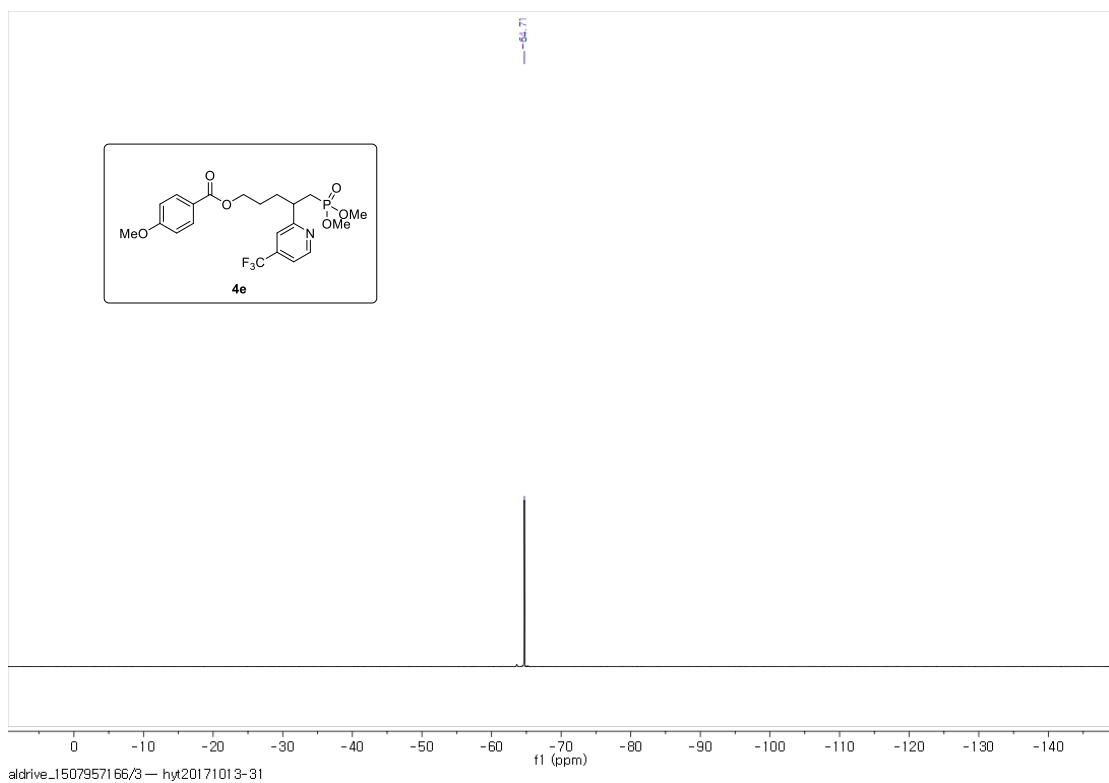

376 MHz,  $^{19}\text{F}$  NMR in  $\text{CDCl}_3$

**4-(4-cyanopyridin-2-yl)-5-(dimethoxyphosphoryl)pentyl 4-methoxybenzoate (4f)**

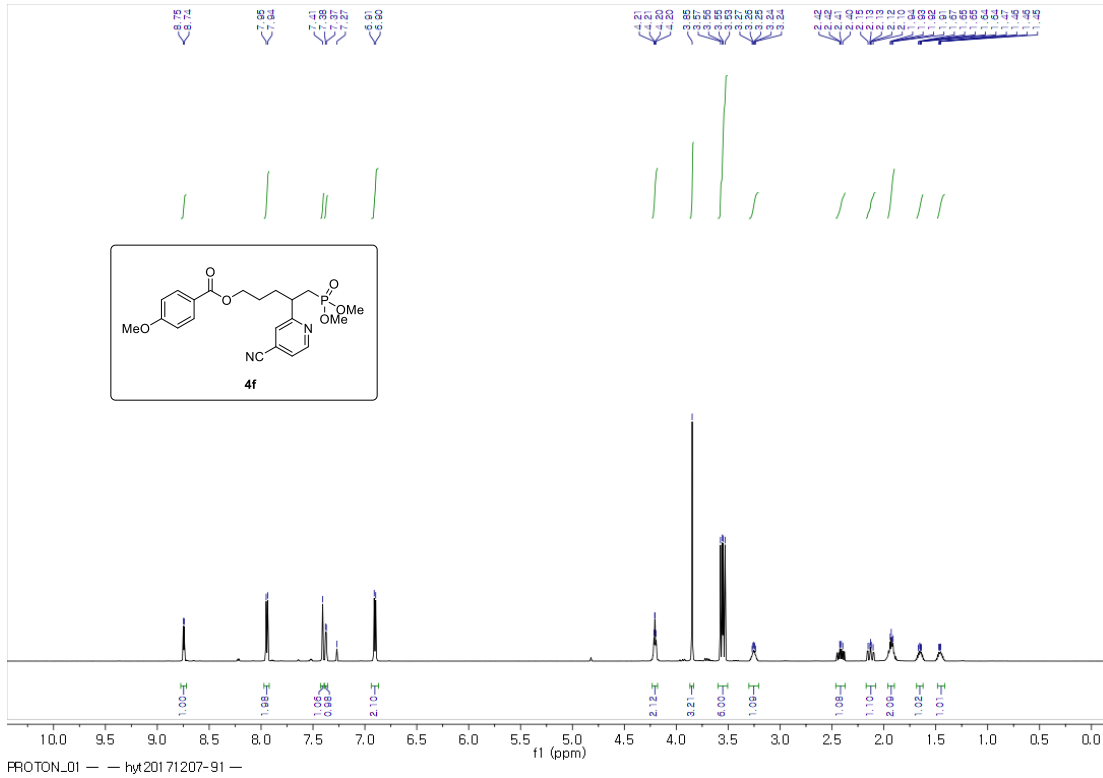

**600 MHz, <sup>1</sup>H NMR in CDCl<sub>3</sub>**

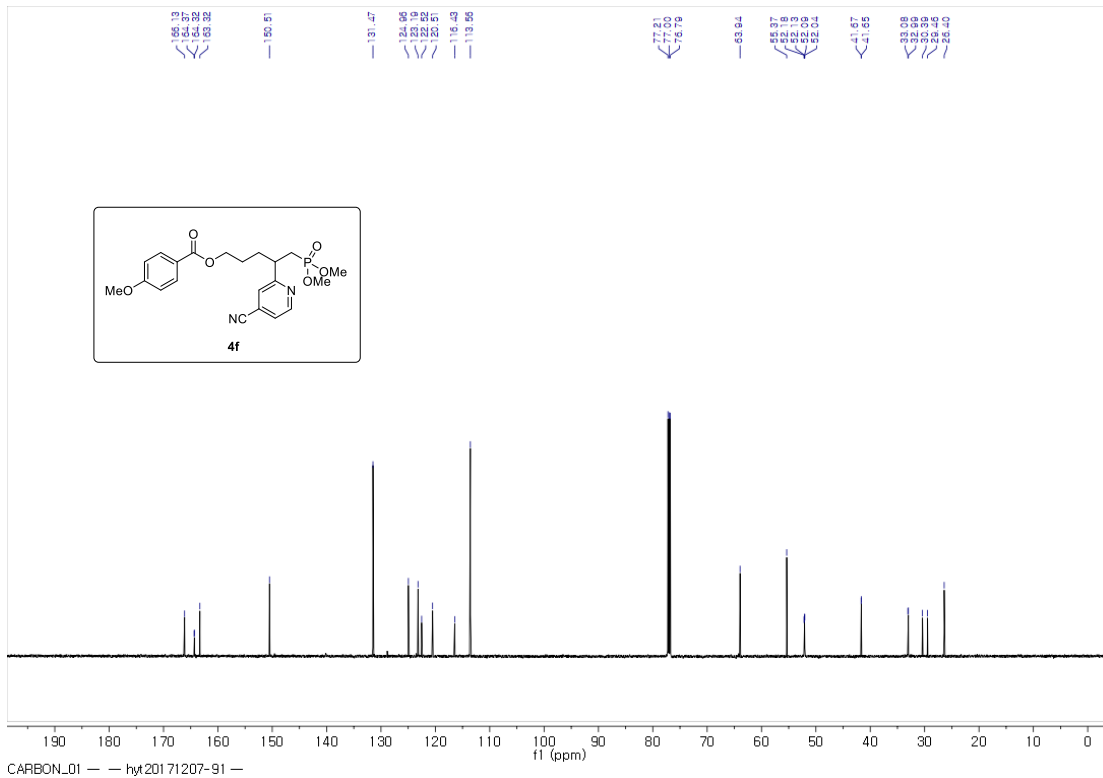

**150 MHz, <sup>13</sup>C NMR in CDCl<sub>3</sub>**

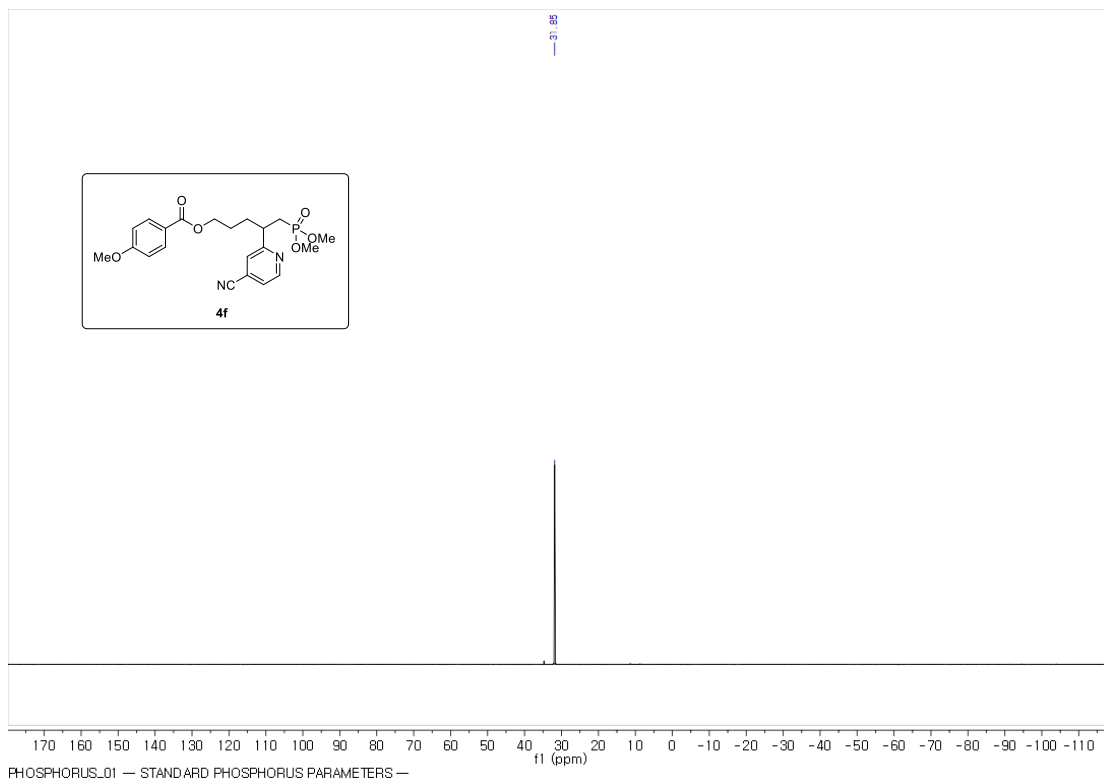

**243 MHz, <sup>31</sup>P NMR in CDCl<sub>3</sub>**

**methyl 2-(1-(dimethoxyphosphoryl)-5-((4-methoxybenzoyl)oxy)pentan-2-yl)isonicotinate (4g)**

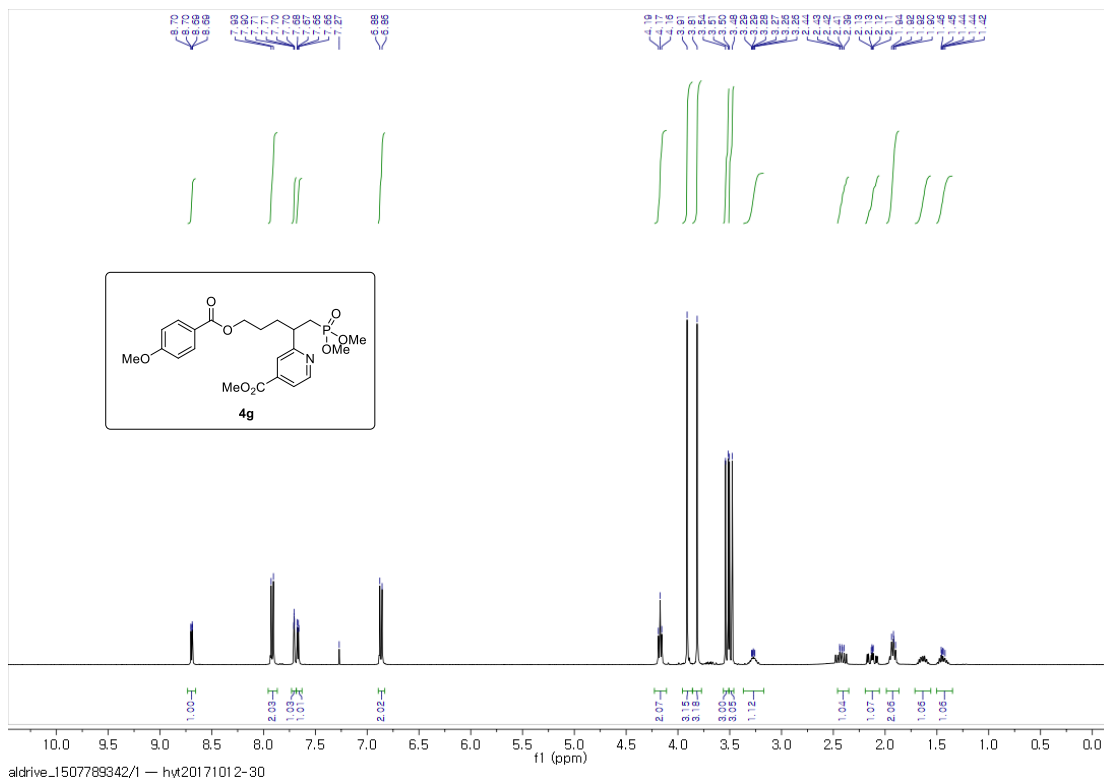

**400 MHz, <sup>1</sup>H NMR in CDCl<sub>3</sub>**

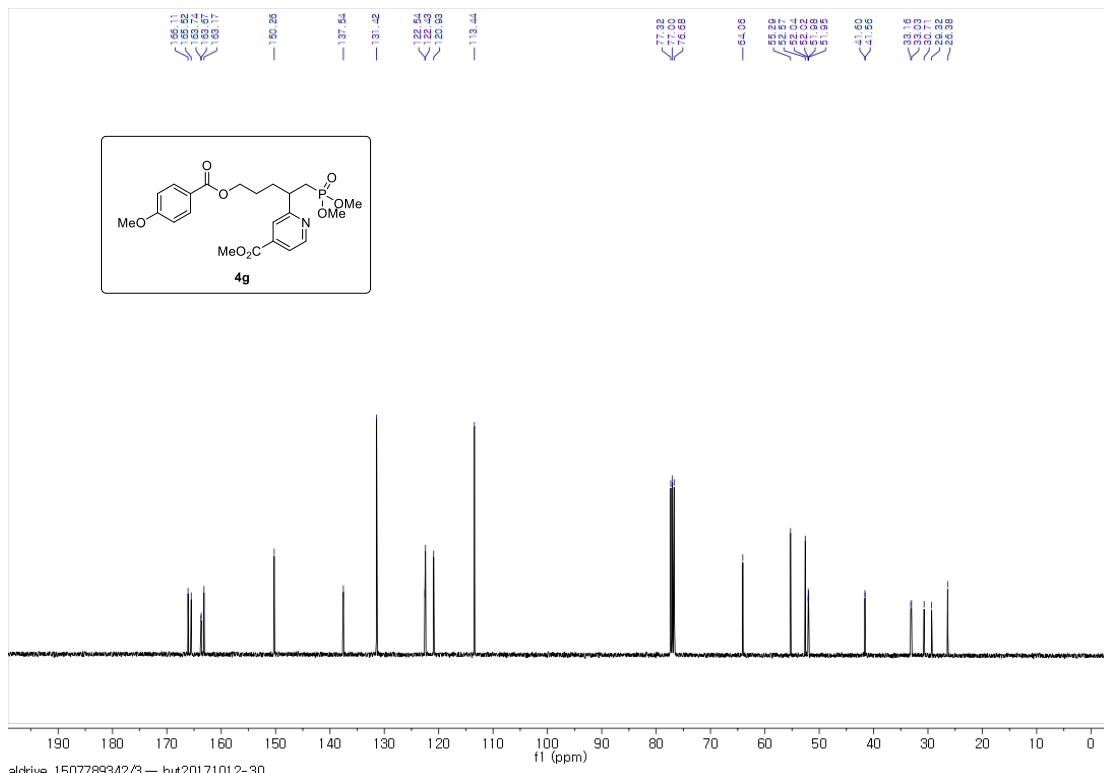

**100 MHz, <sup>13</sup>C NMR in CDCl<sub>3</sub>**



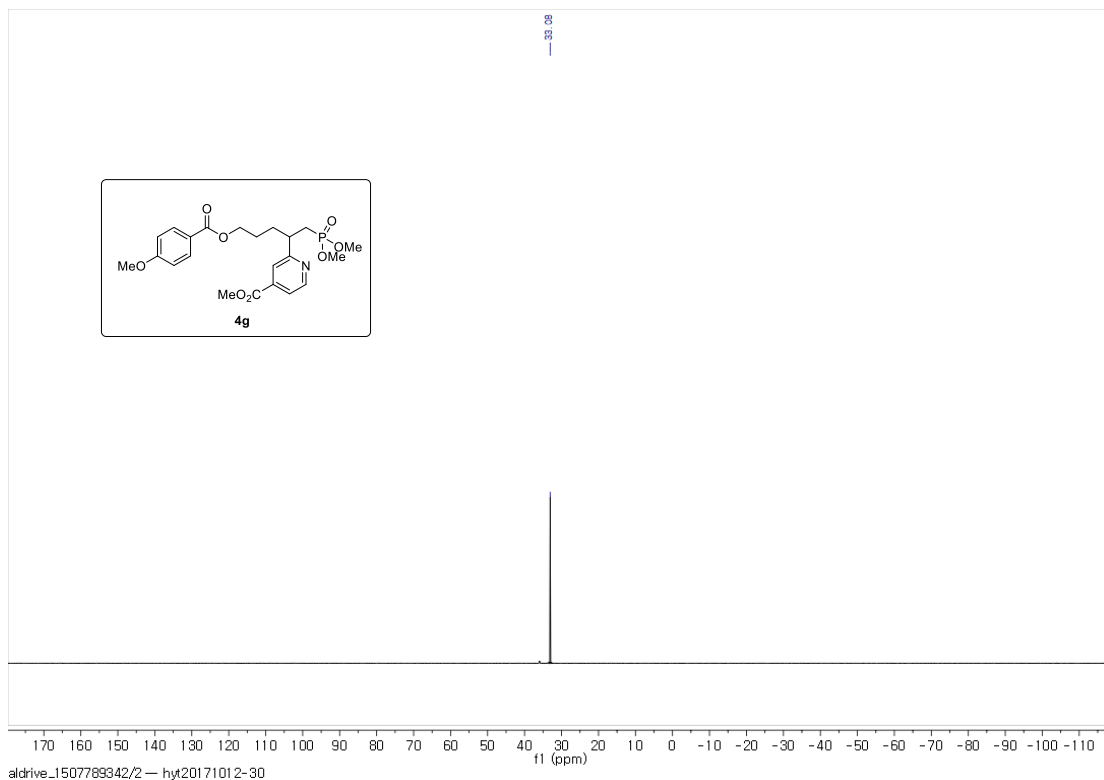

**162 MHz,  $^{31}\text{P}$  NMR in  $\text{CDCl}_3$**

### methyl 6-(1-(dimethoxyphosphoryl)-5-((4-methoxybenzoyl)oxy)pentan-2-yl)nicotinate (4h)

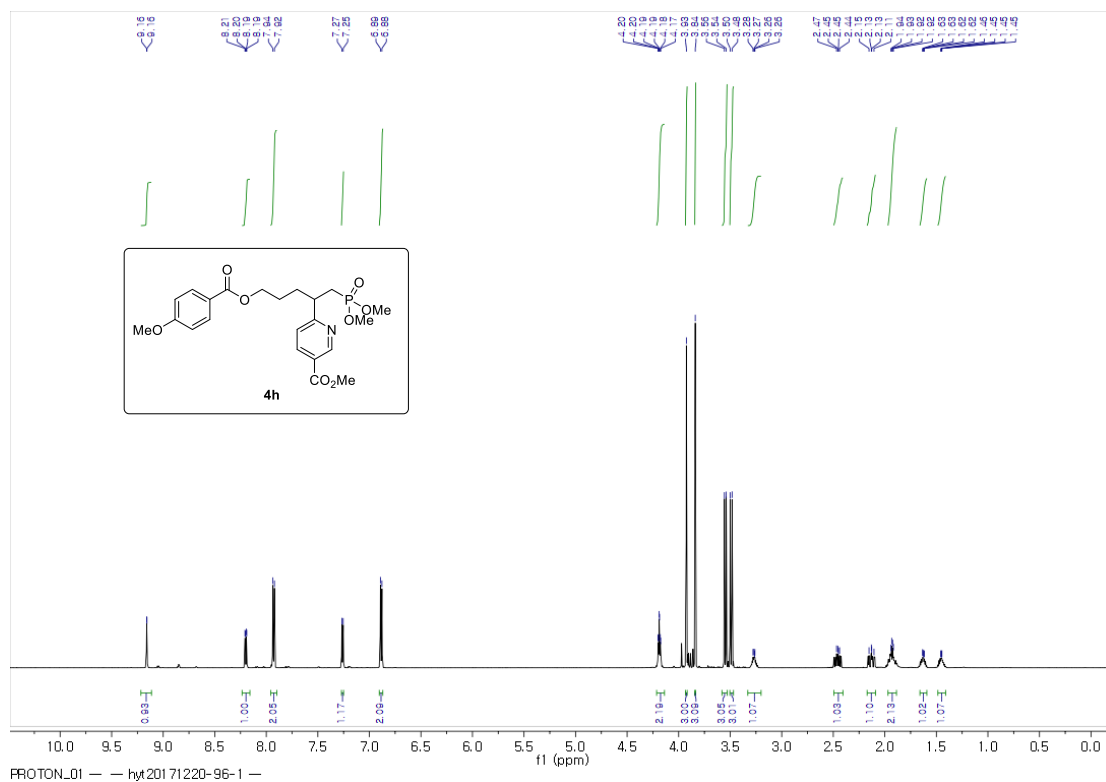

### 600 MHz, <sup>1</sup>H NMR in CDCl<sub>3</sub>

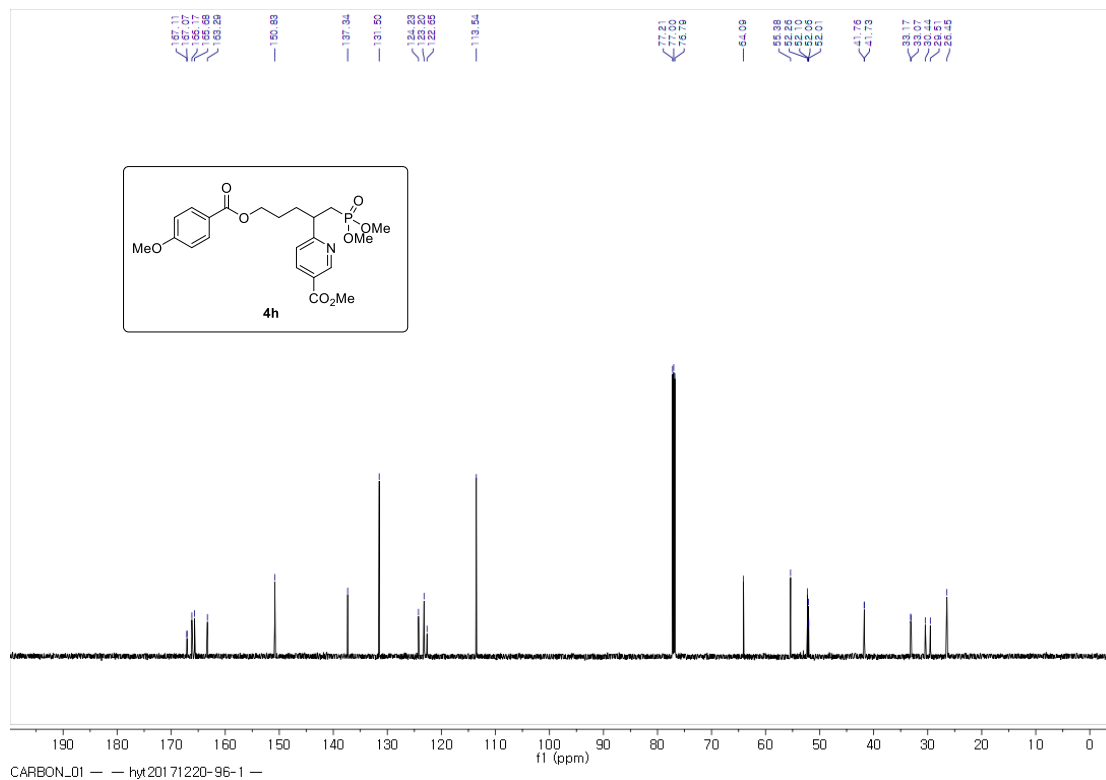

### 150 MHz, <sup>13</sup>C NMR in CDCl<sub>3</sub>

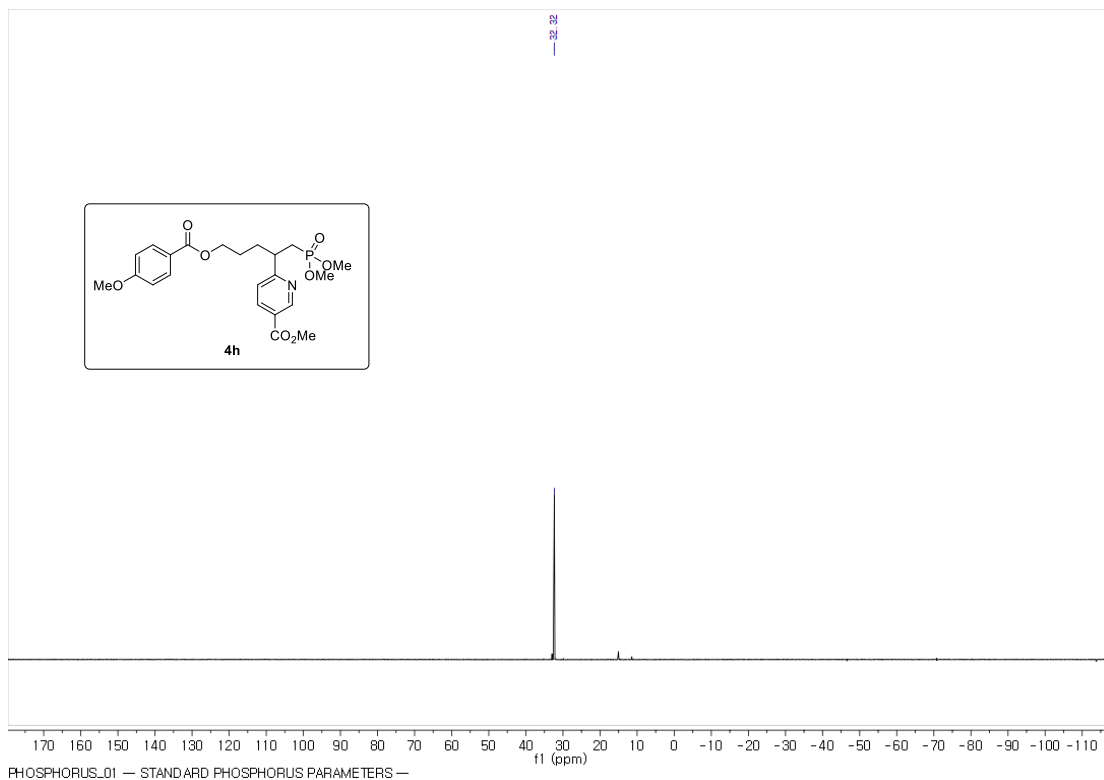

**methyl 2-(1-(dimethoxyphosphoryl)-5-((4-methoxybenzoyl)oxy)pentan-2-yl)nicotinate (4h')**

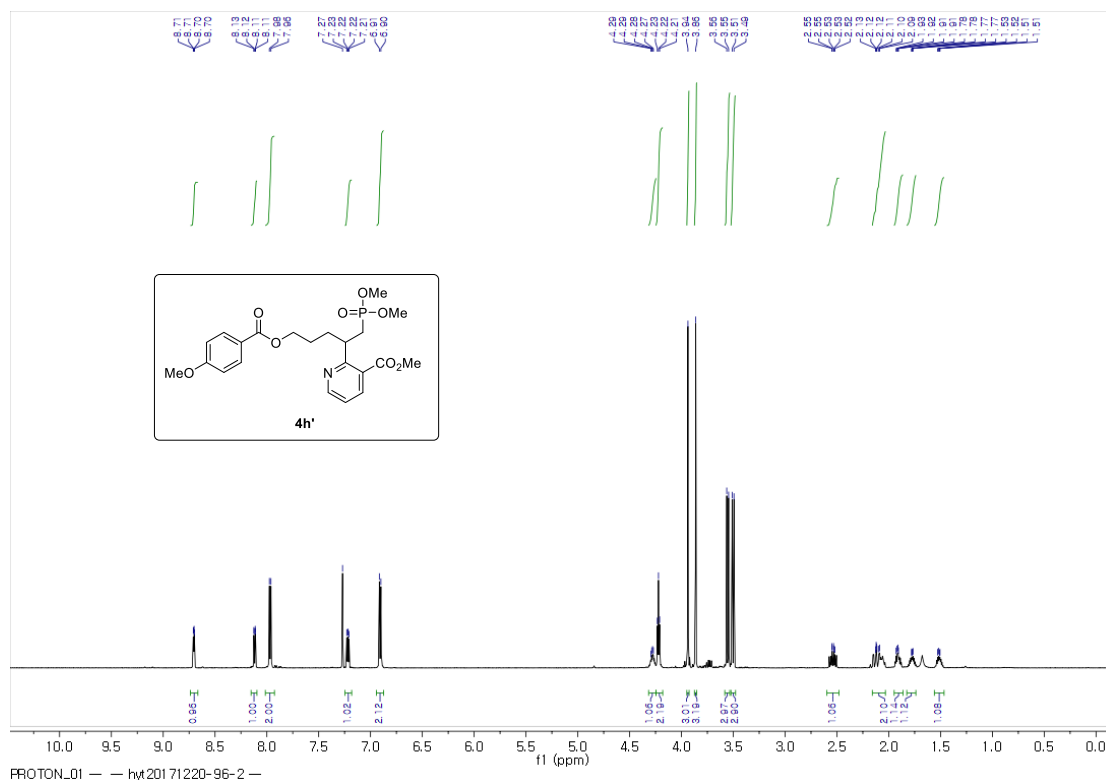

**600 MHz, <sup>1</sup>H NMR in CDCl<sub>3</sub>**

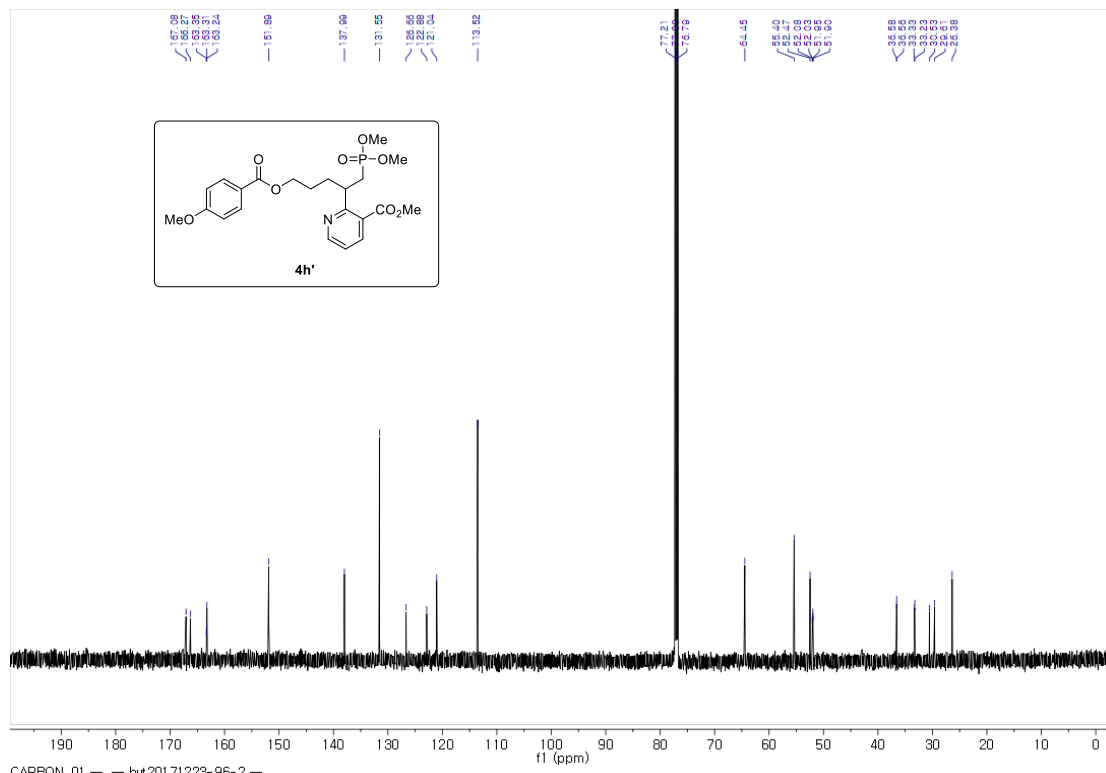

**150 MHz, <sup>13</sup>C NMR in CDCl<sub>3</sub>**

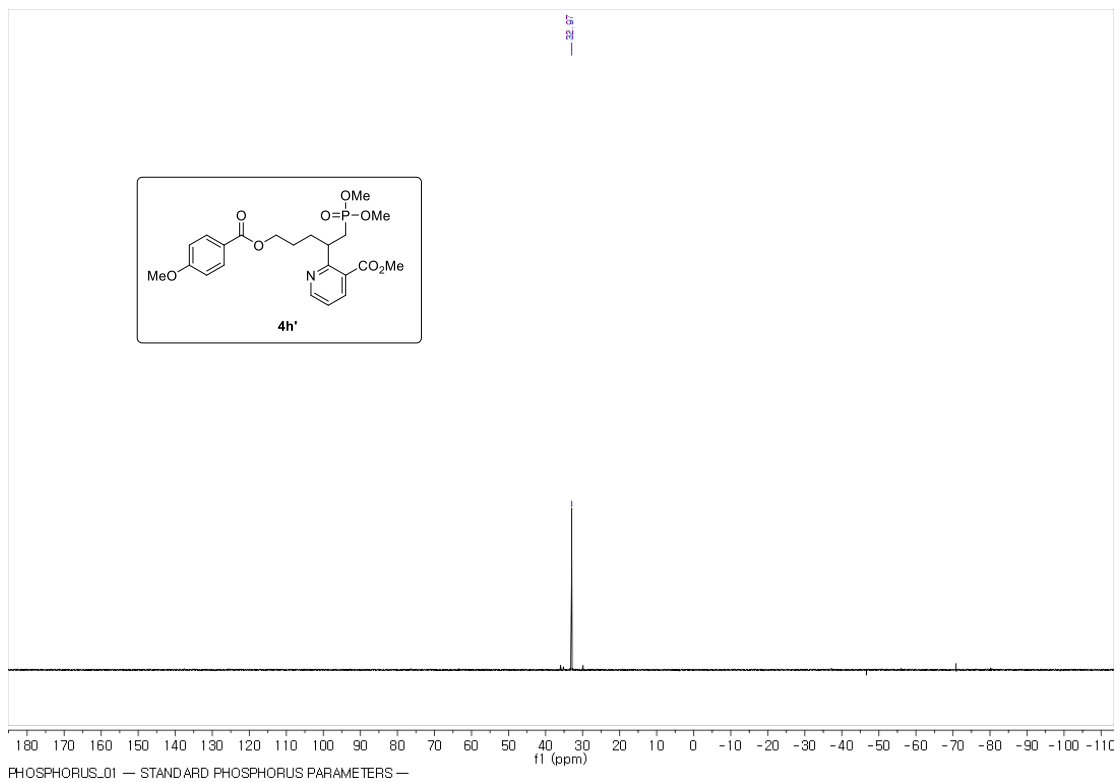

243 MHz,  $^{31}\text{P}$  NMR in  $\text{CDCl}_3$

**methyl 6-(1-(dimethoxyphosphoryl)-5-((4-methoxybenzoyl)oxy)pentan-2-yl) picolinate (4i)**

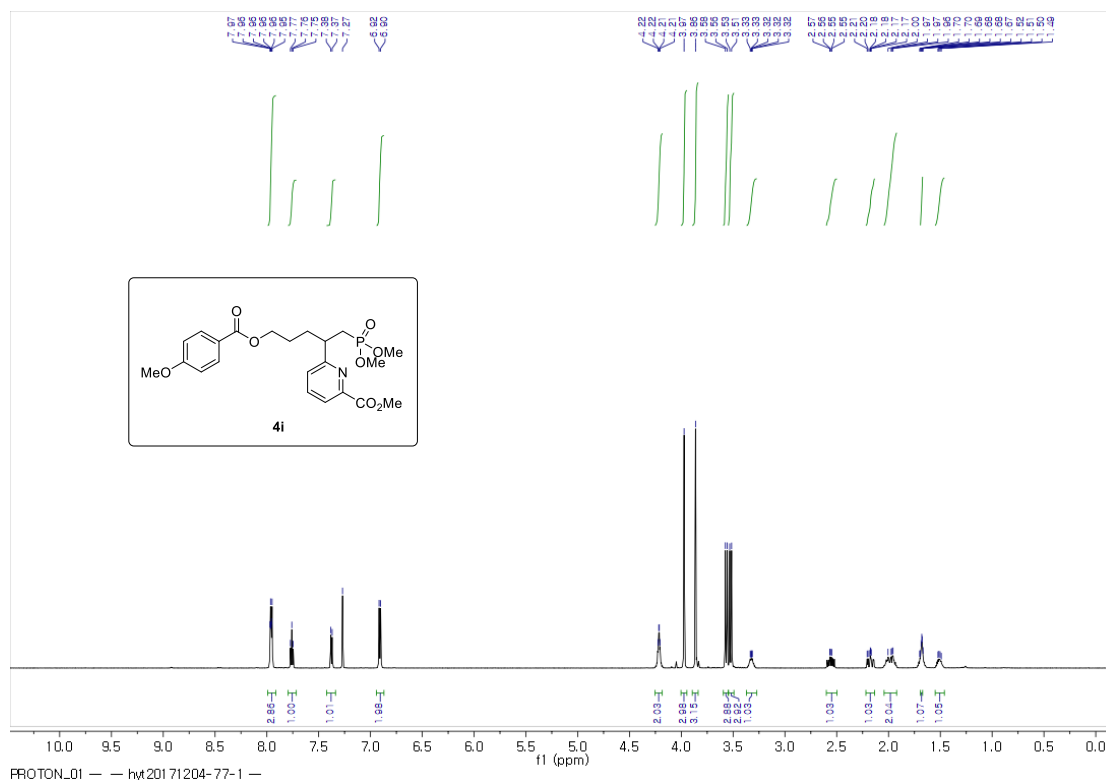

**600 MHz, <sup>1</sup>H NMR in CDCl<sub>3</sub>**

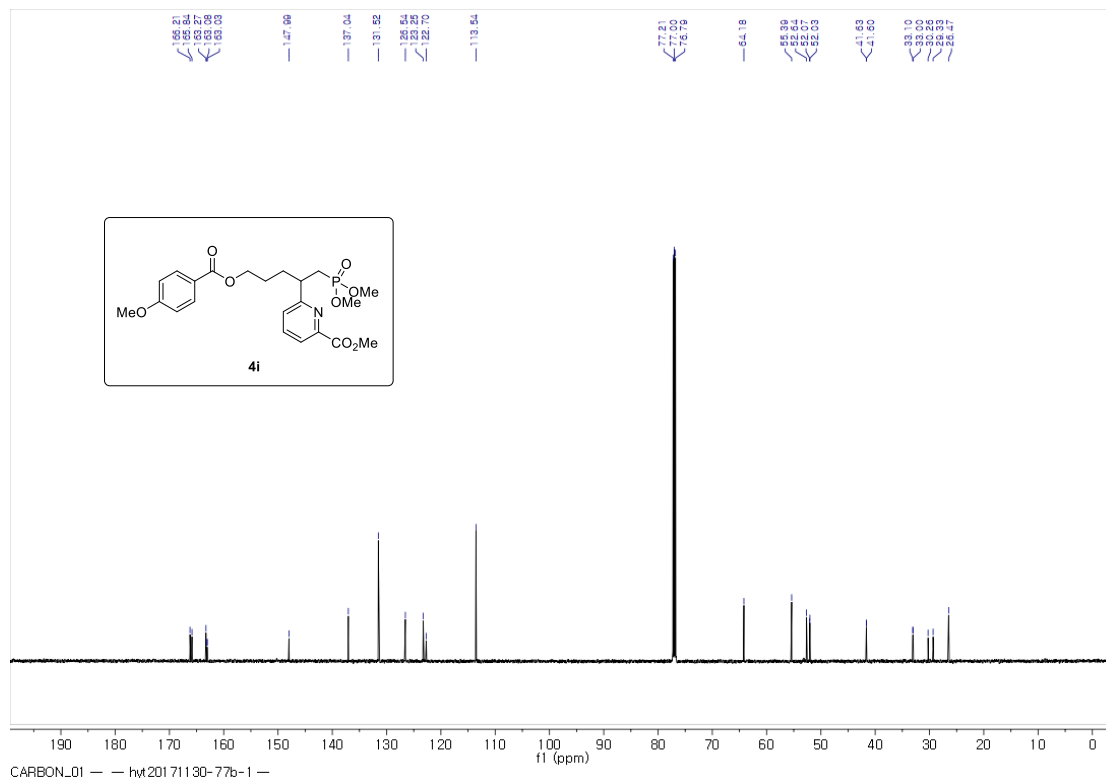

**150 MHz, <sup>13</sup>C NMR in CDCl<sub>3</sub>**

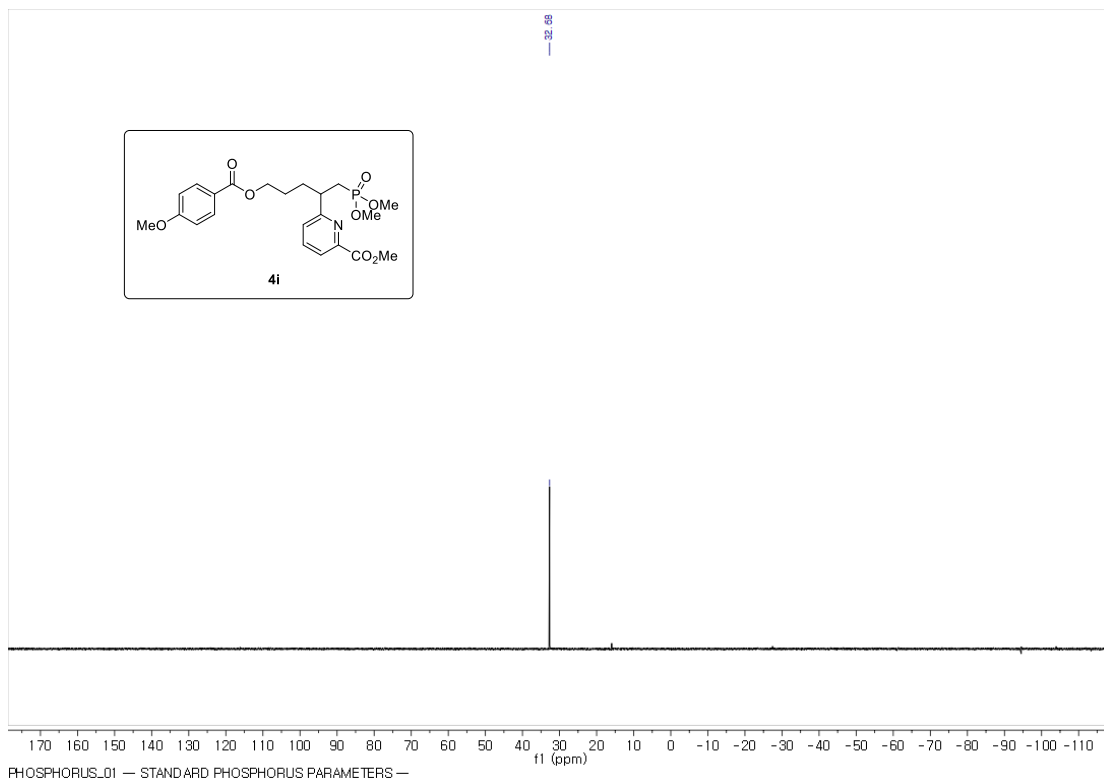

243 MHz, <sup>31</sup>P NMR in CDCl<sub>3</sub>

**methyl 4-(1-(dimethoxyphosphoryl)-5-((4-methoxybenzoyl)oxy)pentan-2-yl)picolinate (4i')**

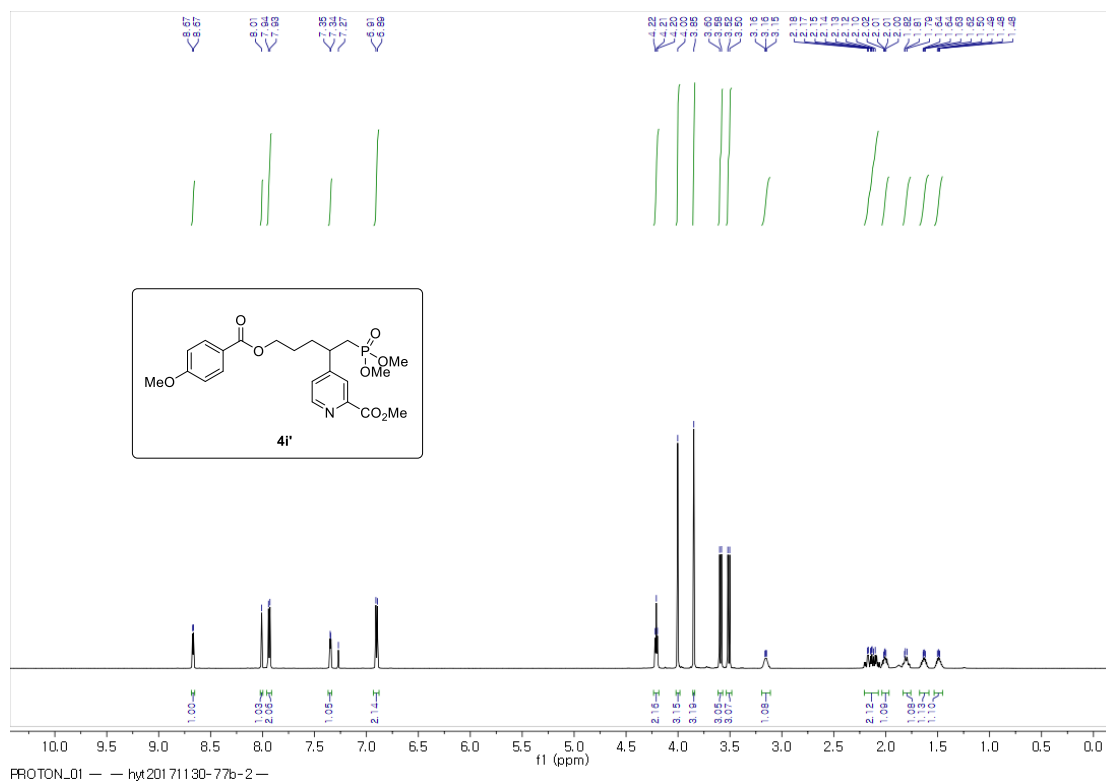

**600 MHz, <sup>1</sup>H NMR in CDCl<sub>3</sub>**

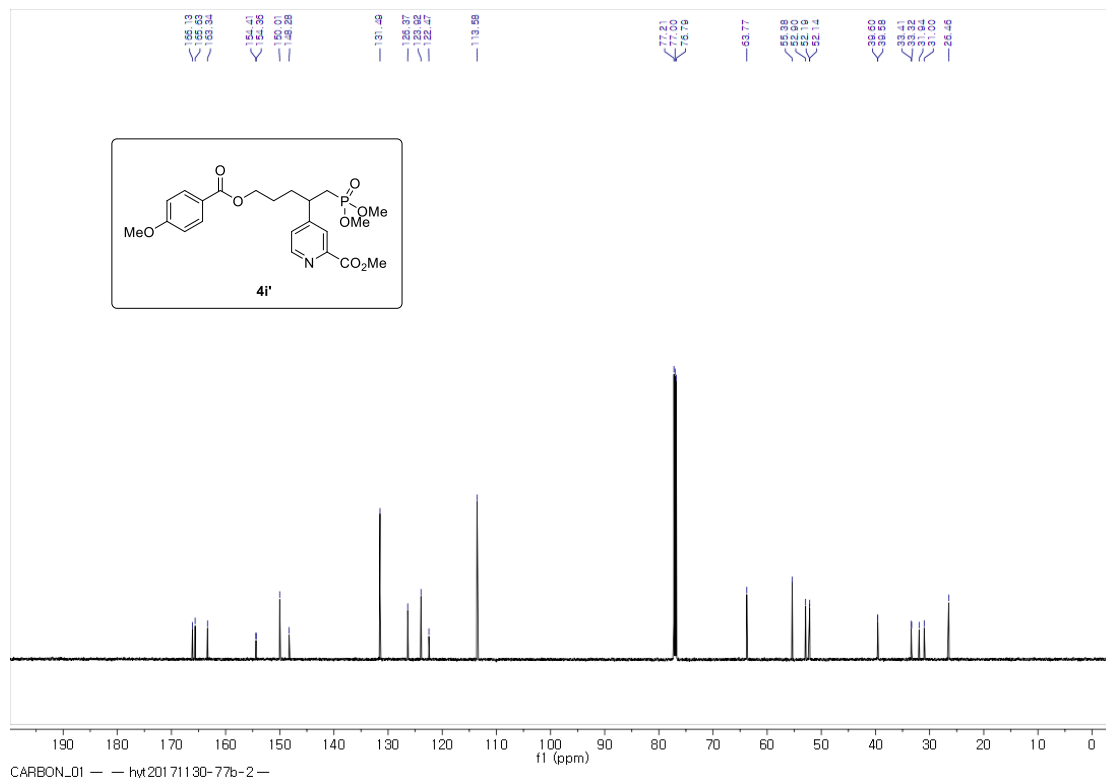

**150 MHz, <sup>13</sup>C NMR in CDCl<sub>3</sub>**



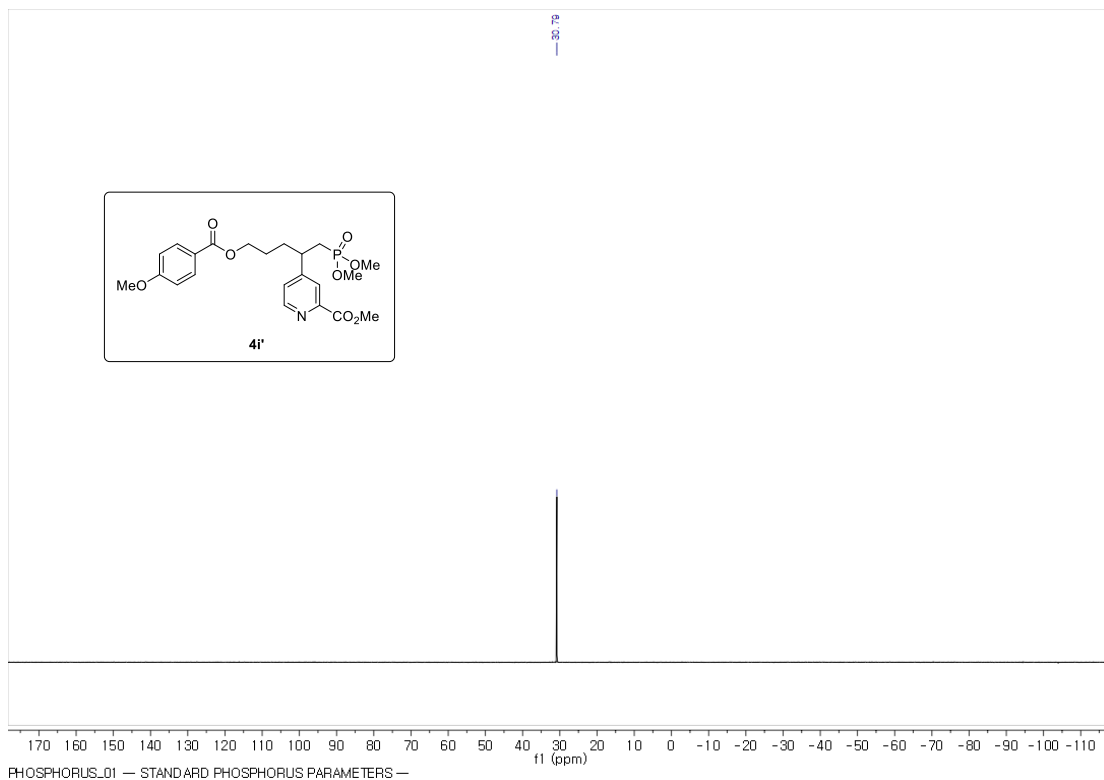

**243 MHz,  $^{31}\text{P}$  NMR in  $\text{CDCl}_3$**

**5-(dimethoxyphosphoryl)-4-(6-methylpyridin-2-yl)pentyl 4-methoxybenzoate (4j)**

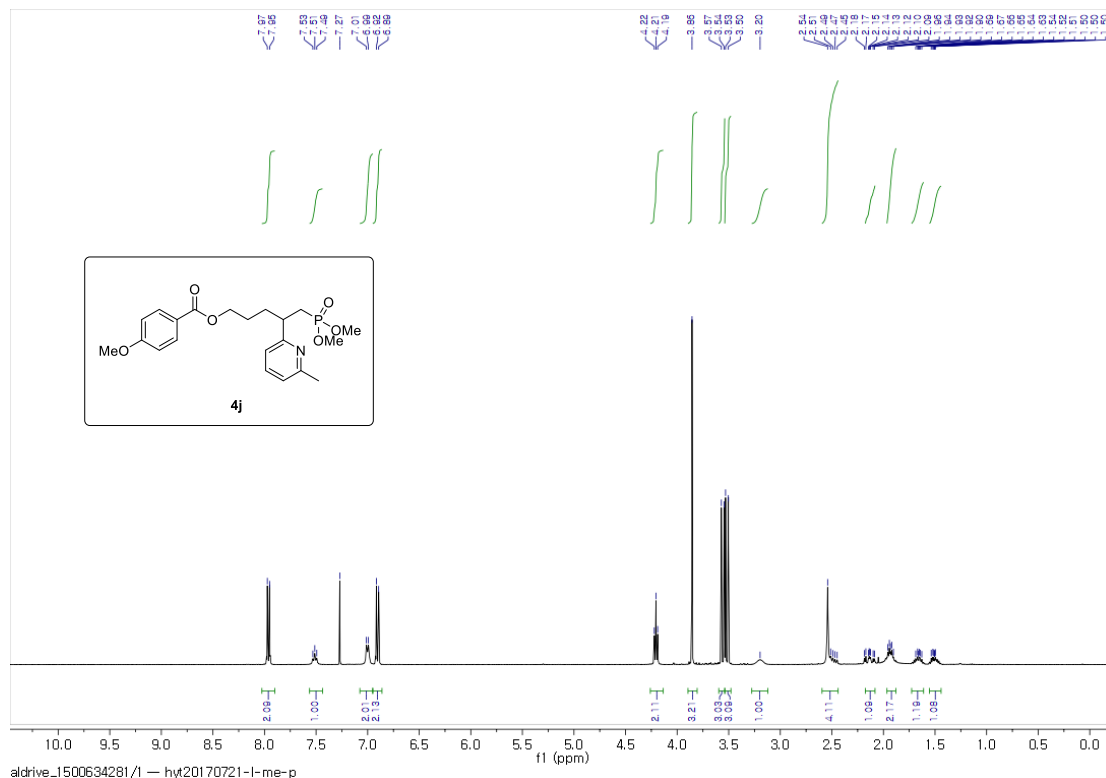

**600 MHz, <sup>1</sup>H NMR in CDCl<sub>3</sub>**

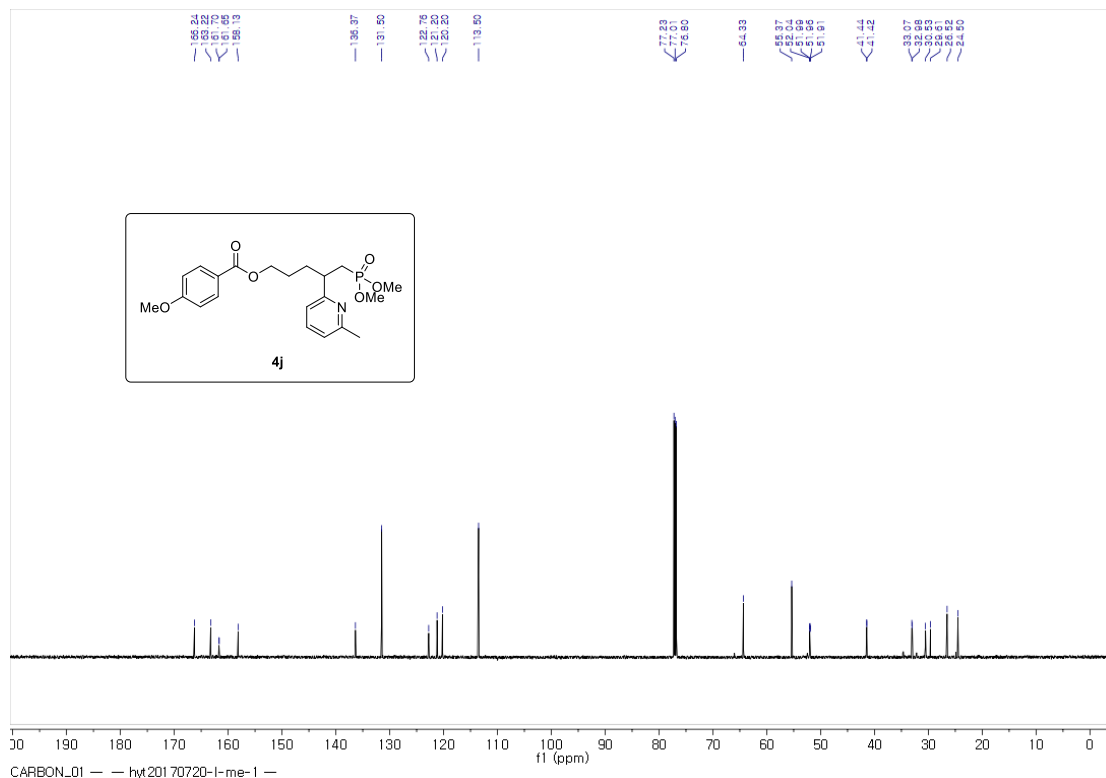

**150 MHz, <sup>13</sup>C NMR in CDCl<sub>3</sub>**

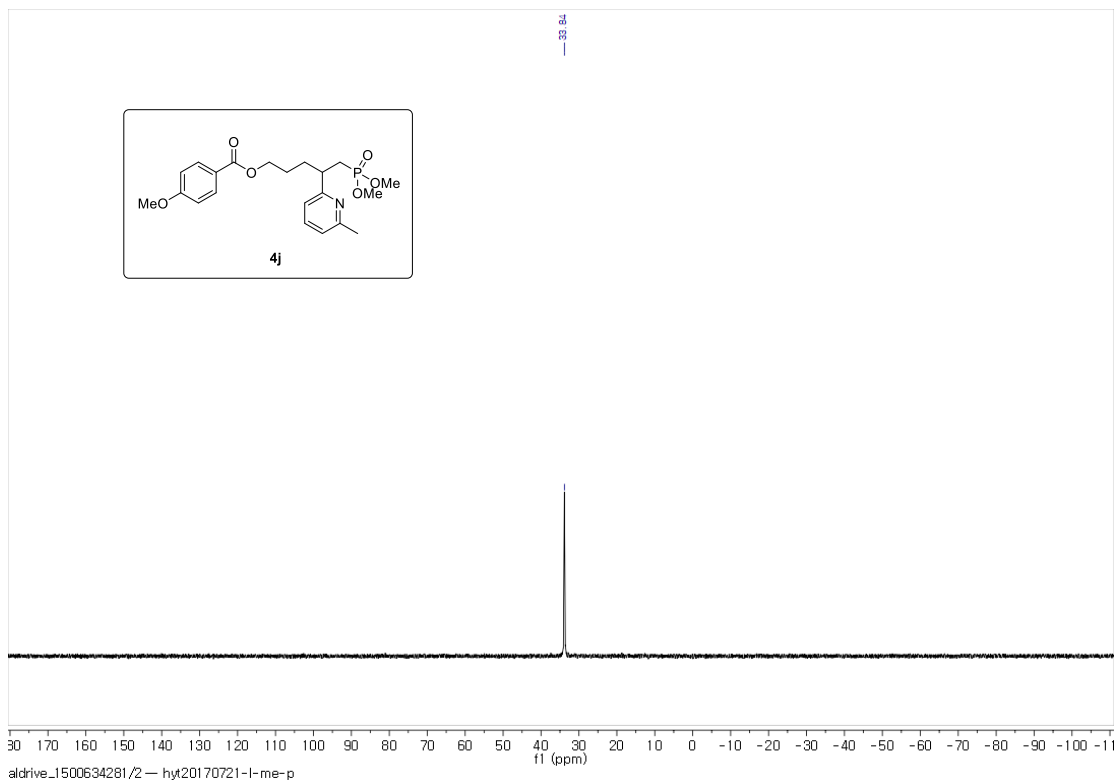

**243 MHz,  $^{31}\text{P}$  NMR in  $\text{CDCl}_3$**

### 5-(dimethoxyphosphoryl)-4-(2-methylpyridin-4-yl)pentyl 4-methoxybenzoate (4j')

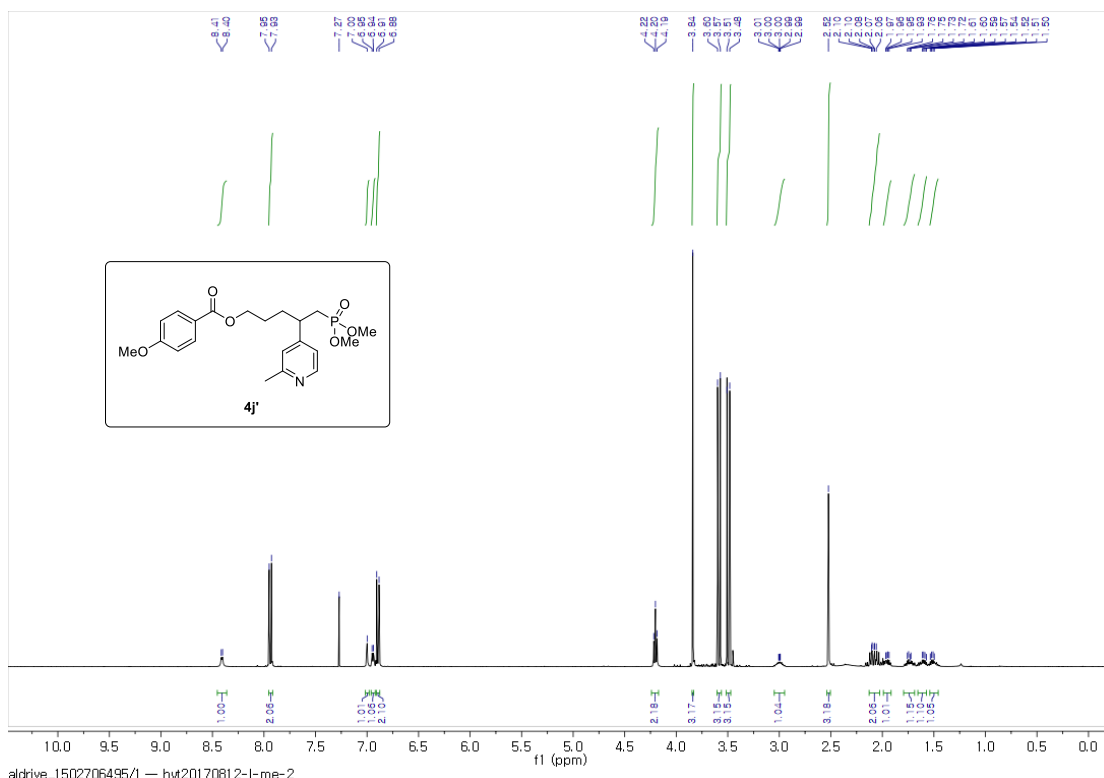

### 600 MHz, <sup>1</sup>H NMR in CDCl<sub>3</sub>

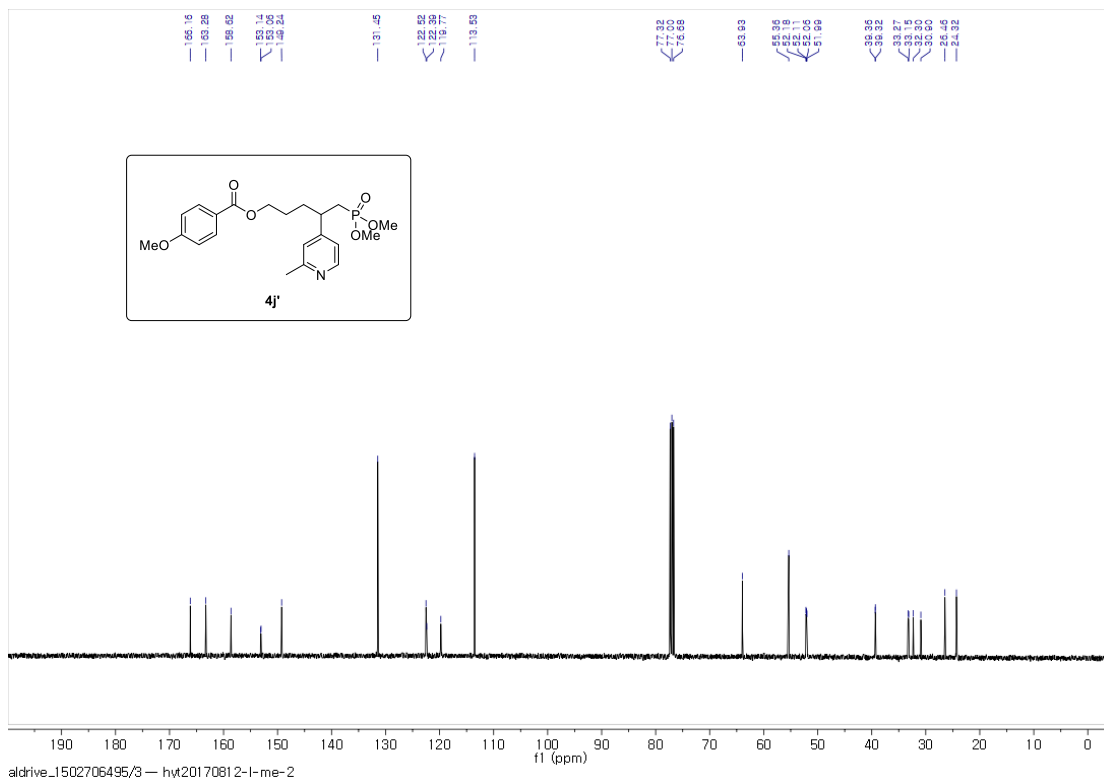

### 150 MHz, <sup>13</sup>C NMR in CDCl<sub>3</sub>

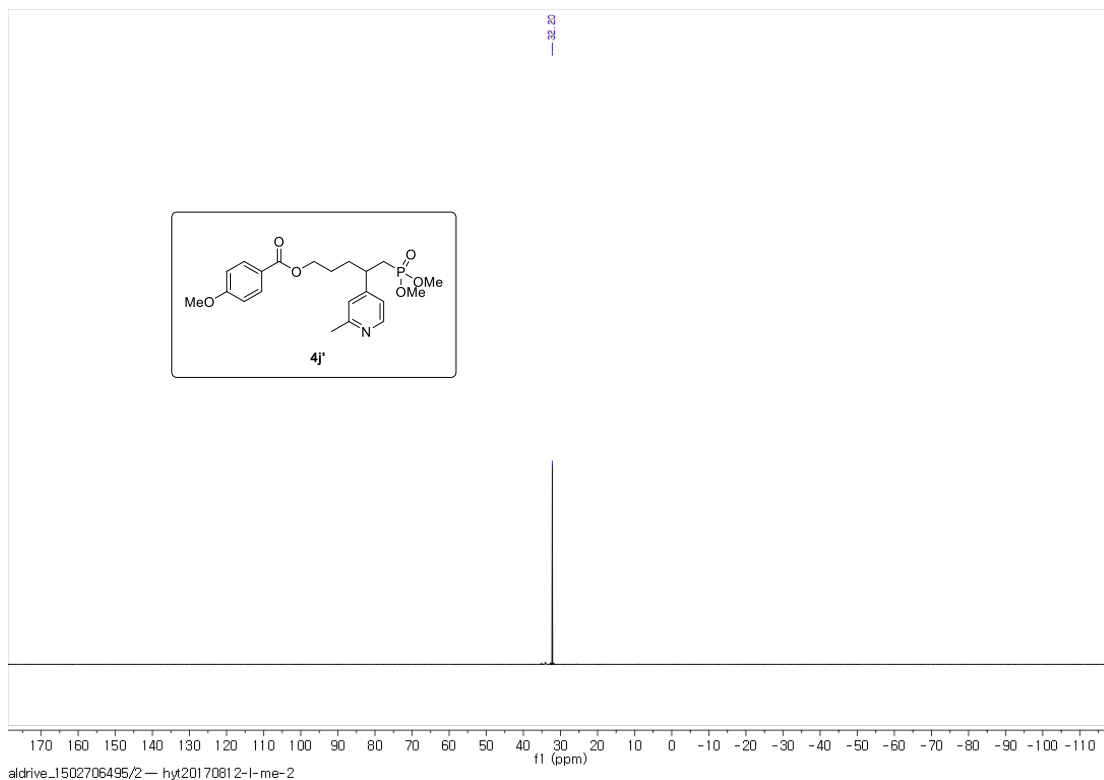

**243 MHz,  $^{31}\text{P}$  NMR in  $\text{CDCl}_3$**

### 5-(dimethoxyphosphoryl)-4-(5-methoxypyridin-2-yl)pentyl 4-methoxybenzoate (4k)

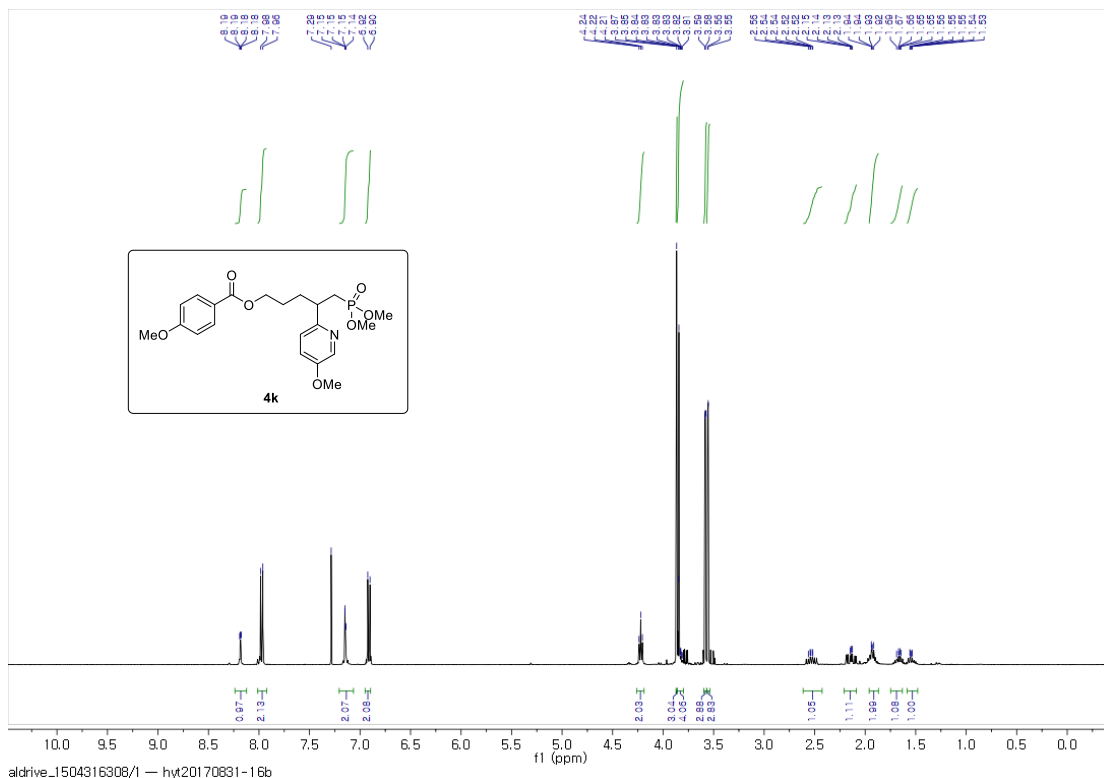

### 400 MHz, <sup>1</sup>H NMR in CDCl<sub>3</sub>

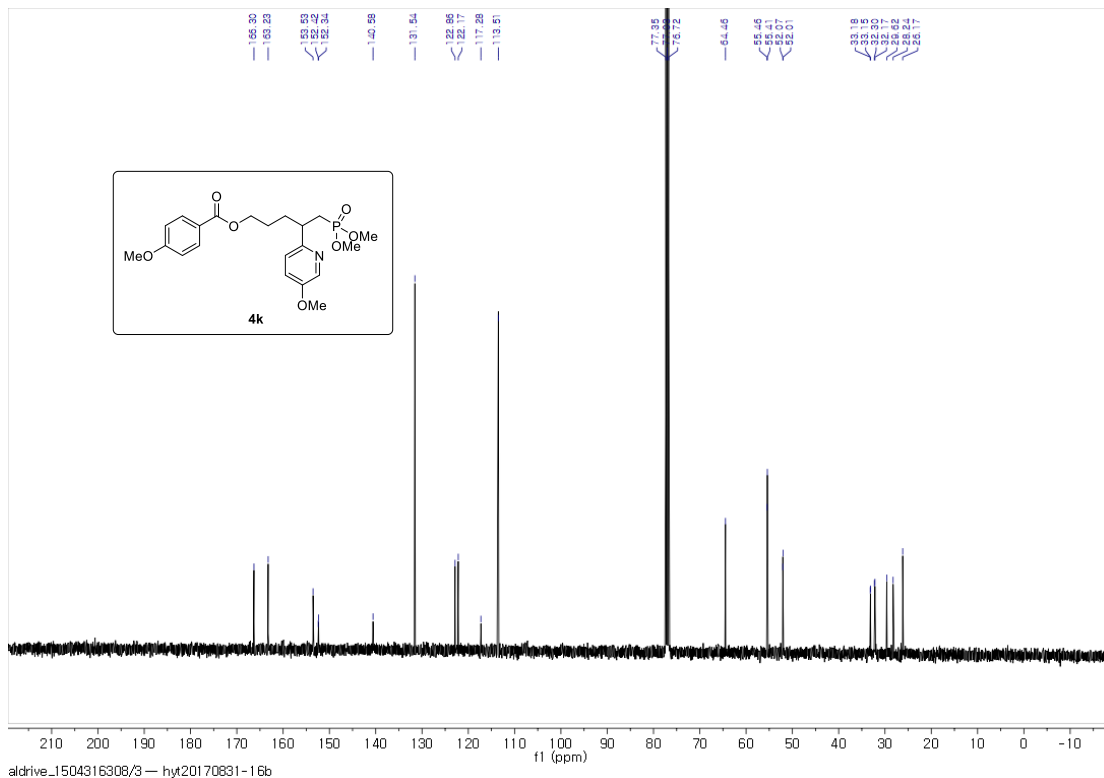

### 100 MHz, <sup>13</sup>C NMR in CDCl<sub>3</sub>

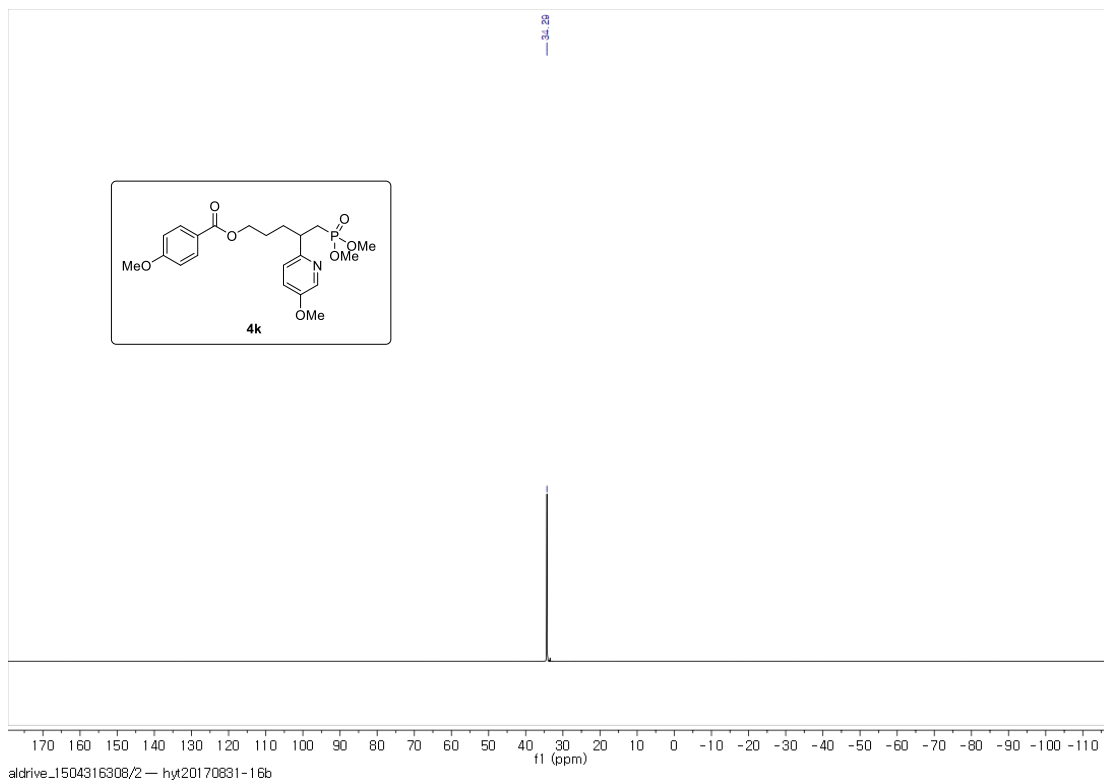

**162 MHz,  $^{31}\text{P}$  NMR in  $\text{CDCl}_3$**





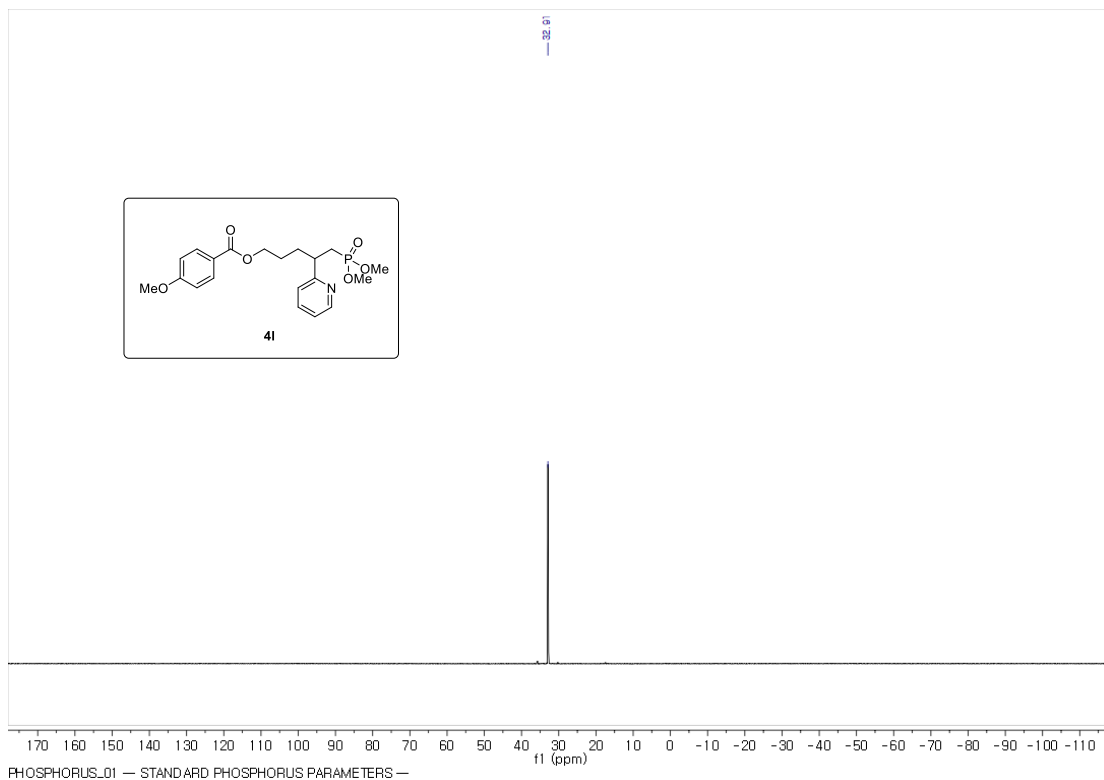

243 MHz,  $^{31}\text{P}$  NMR in  $\text{CDCl}_3$

### 5-(dimethoxyphosphoryl)-4-(pyridin-4-yl)pentyl 4-methoxybenzoate (4I')

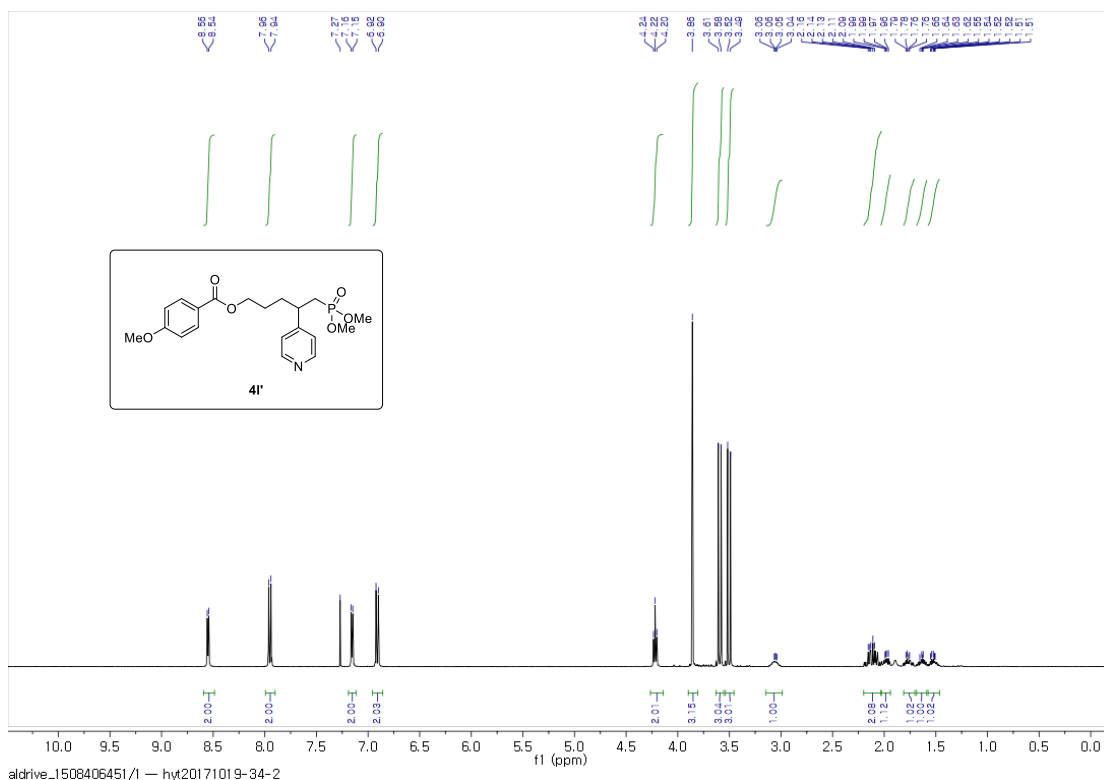

### 400 MHz, <sup>1</sup>H NMR in CDCl<sub>3</sub>

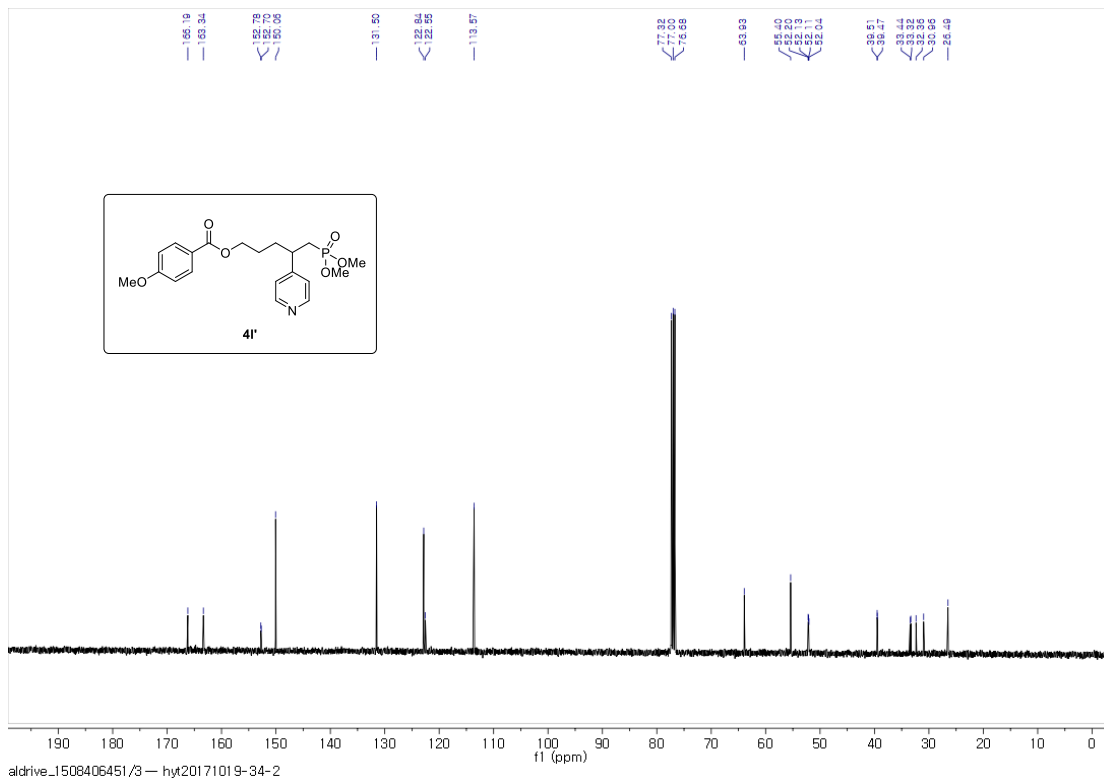

### 100 MHz, <sup>13</sup>C NMR in CDCl<sub>3</sub>

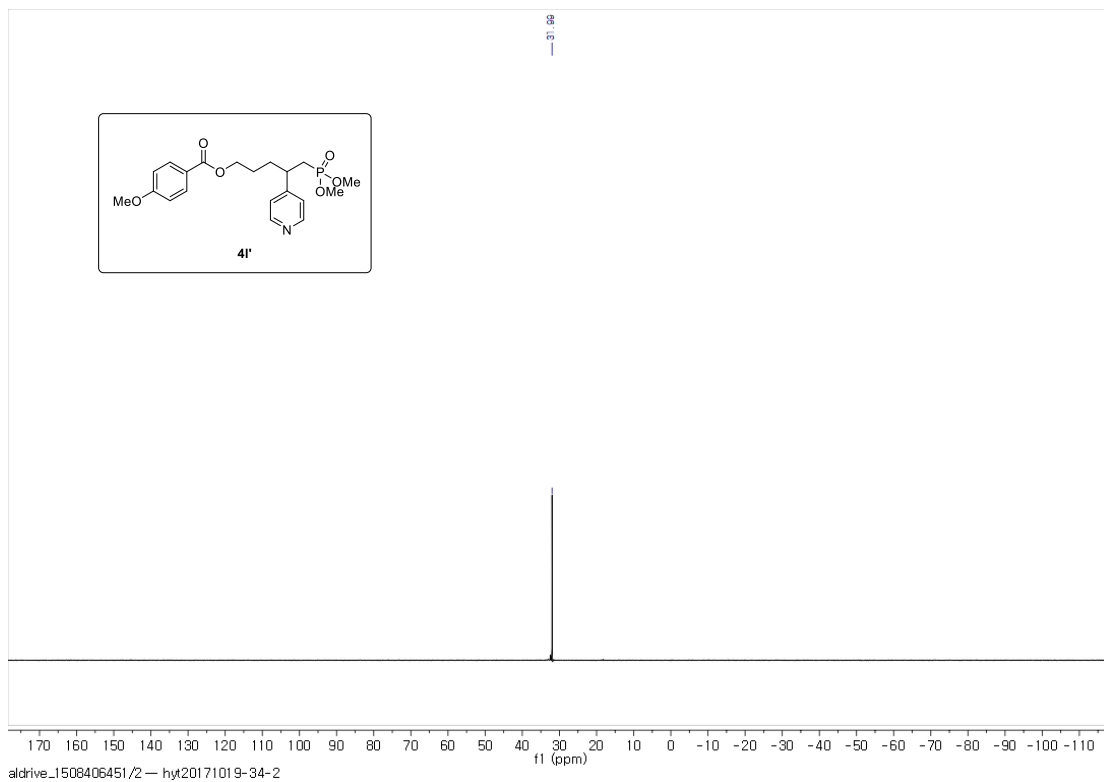

162 MHz,  $^{31}\text{P}$  NMR in  $\text{CDCl}_3$

**5-(dimethoxyphosphoryl)-4-(2,6-dimethylpyridin-4-yl)pentyl 4-methoxybenzoate (4m)**

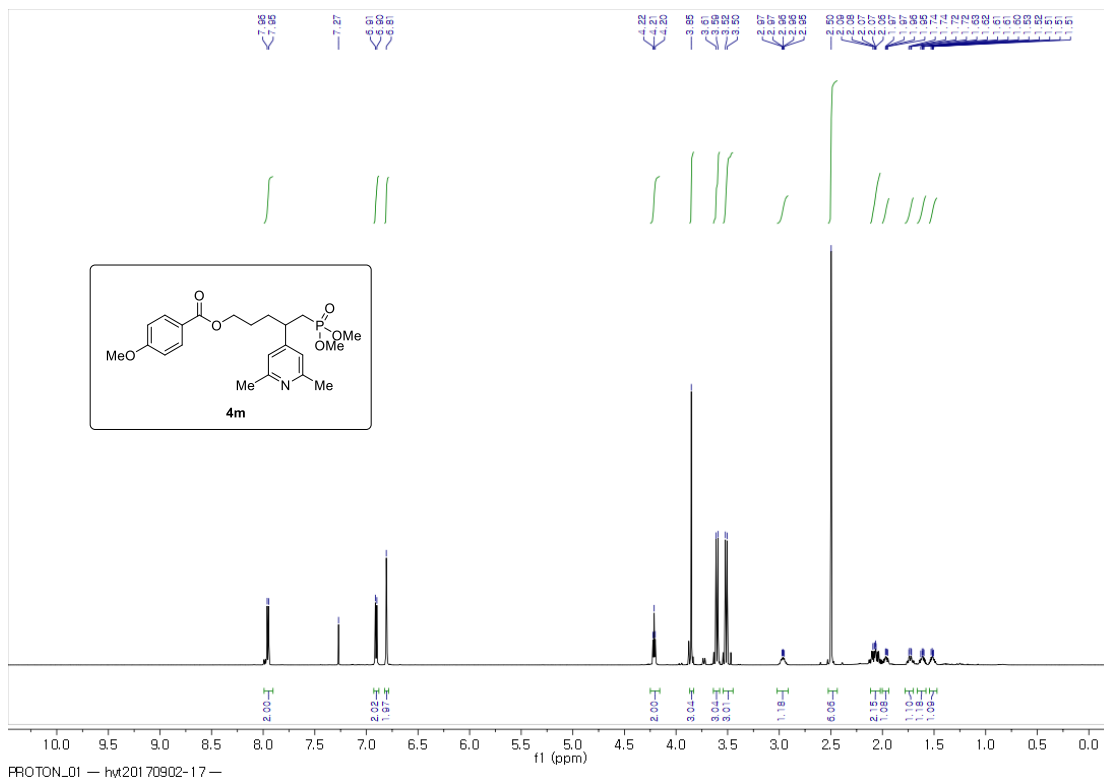

**600 MHz, <sup>1</sup>H NMR in CDCl<sub>3</sub>**

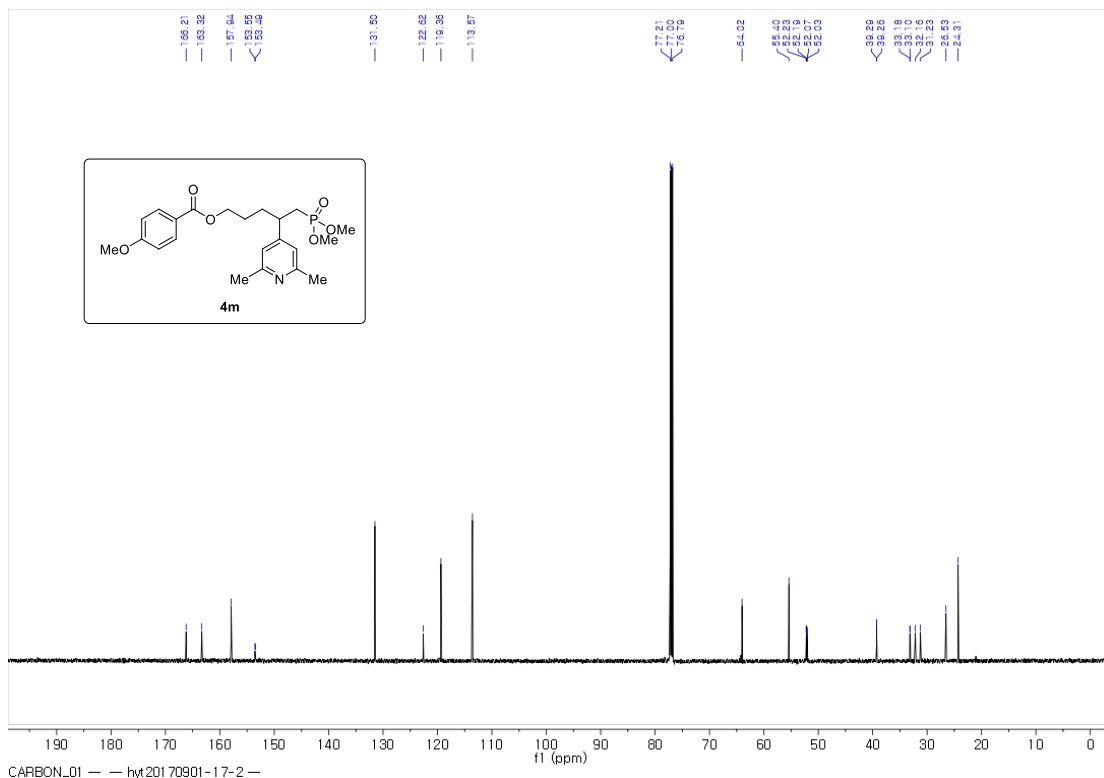

**150 MHz, <sup>13</sup>C NMR in CDCl<sub>3</sub>**

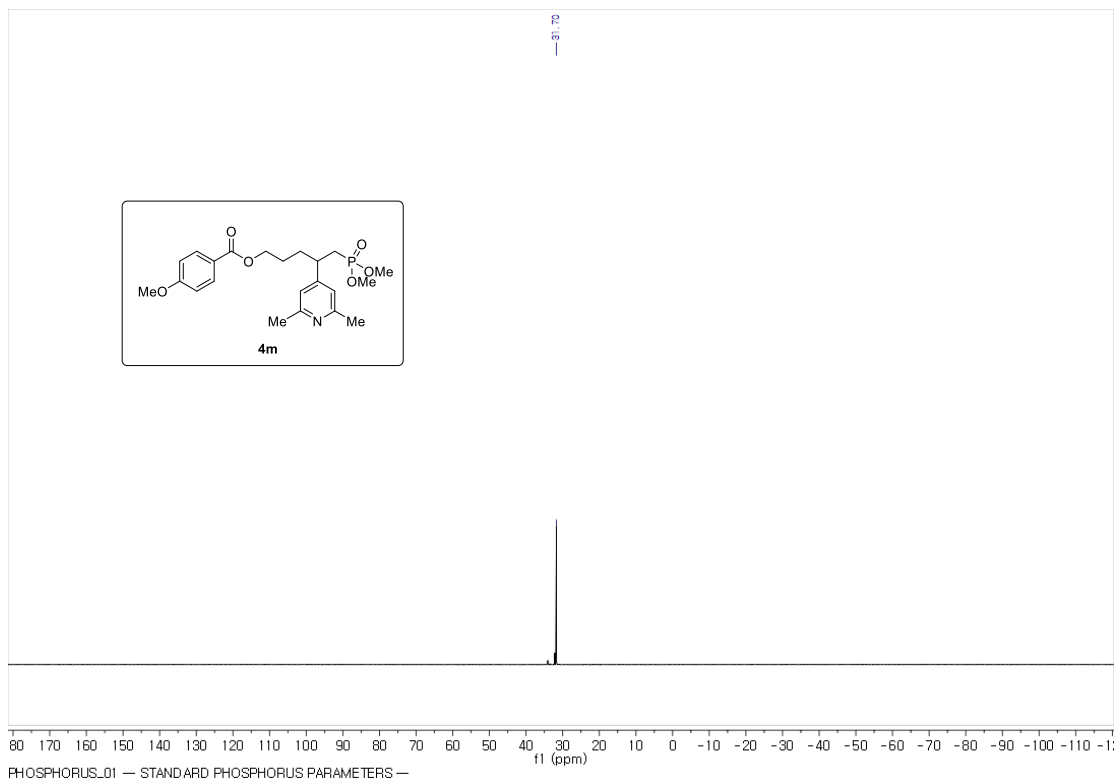

243 MHz,  $^{31}\text{P}$  NMR in  $\text{CDCl}_3$

### 5-(dimethoxyphosphoryl)-4-(pyridazin-3-yl)pentyl 4-methoxybenzoate (4n)

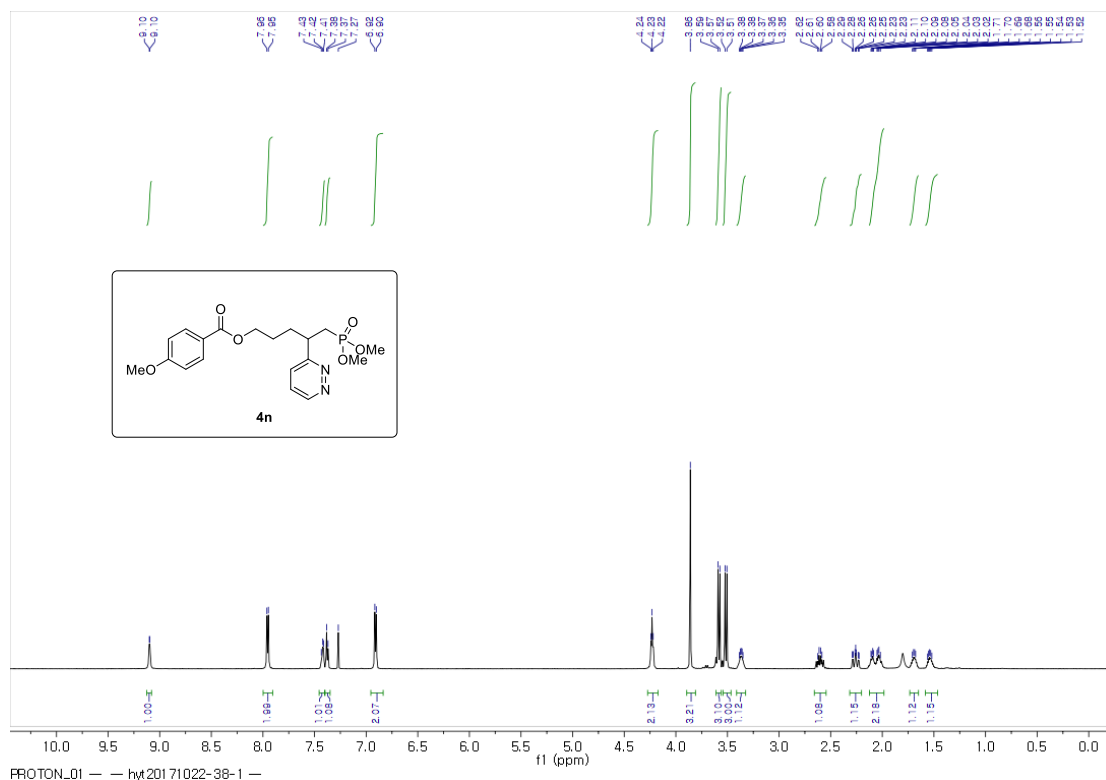

### 600 MHz, <sup>1</sup>H NMR in CDCl<sub>3</sub>

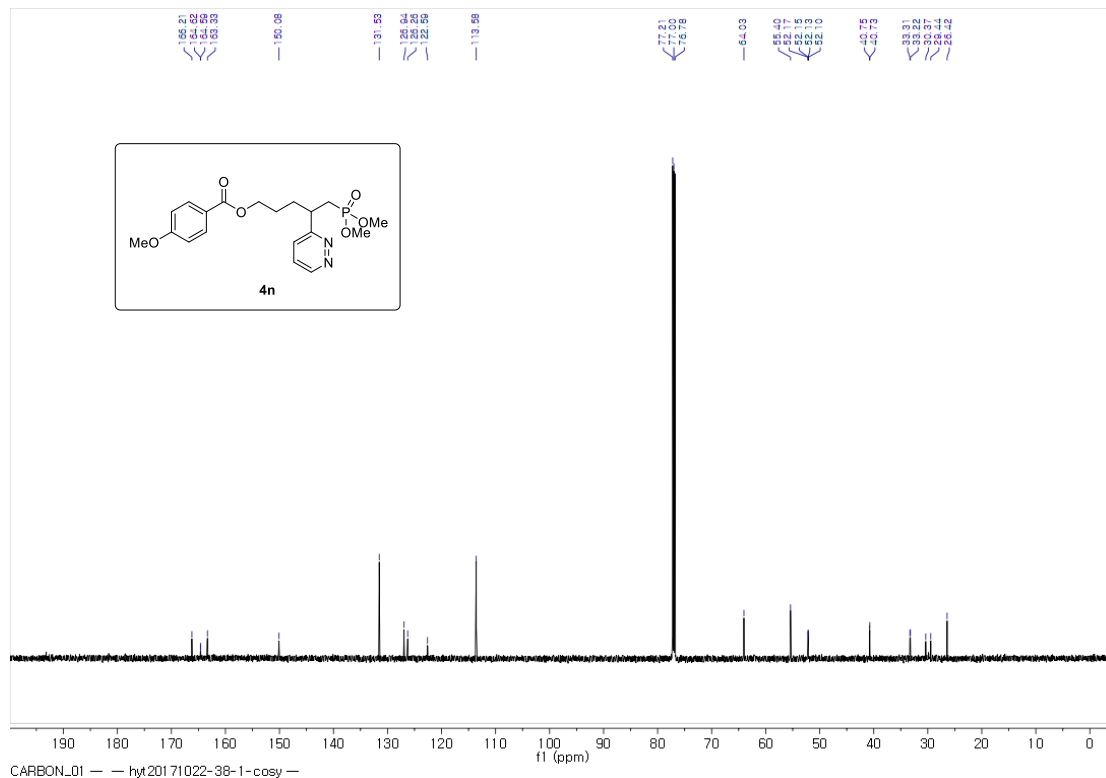

### 150 MHz, <sup>13</sup>C NMR in CDCl<sub>3</sub>

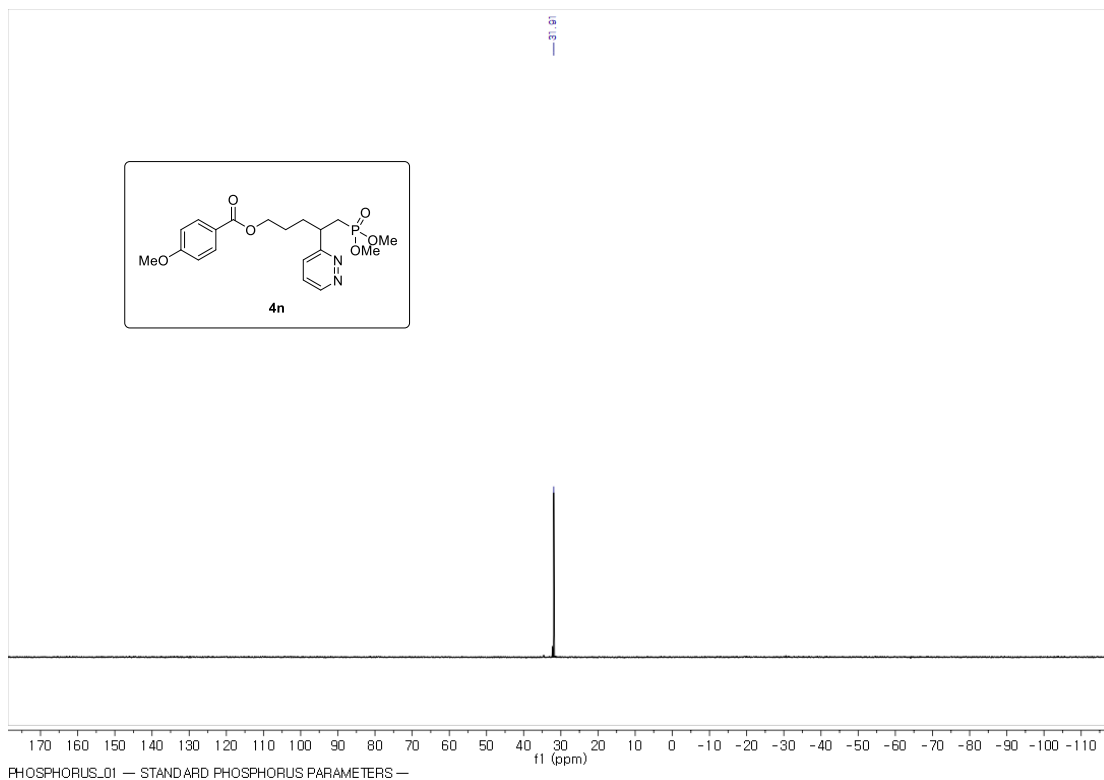

243 MHz, <sup>31</sup>P NMR in CDCl<sub>3</sub>

### 5-(dimethoxyphosphoryl)-4-(pyridazin-4-yl)pentyl 4-methoxybenzoate (4n')

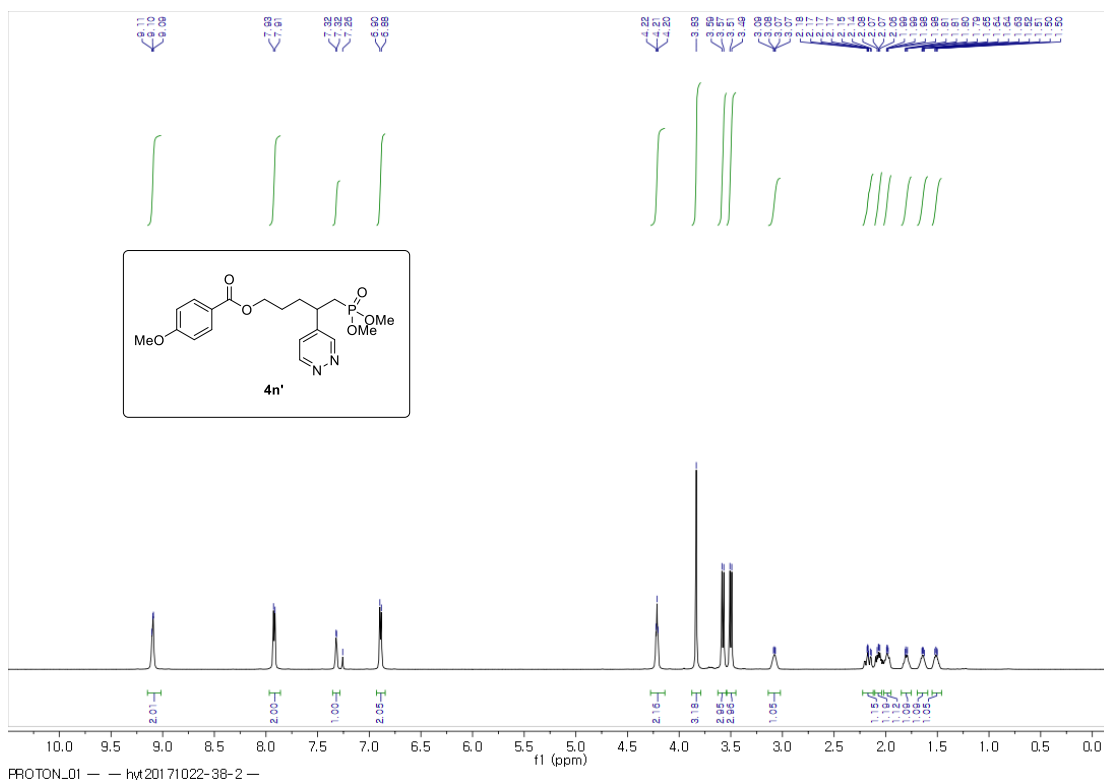

### 600 MHz, <sup>1</sup>H NMR in CDCl<sub>3</sub>

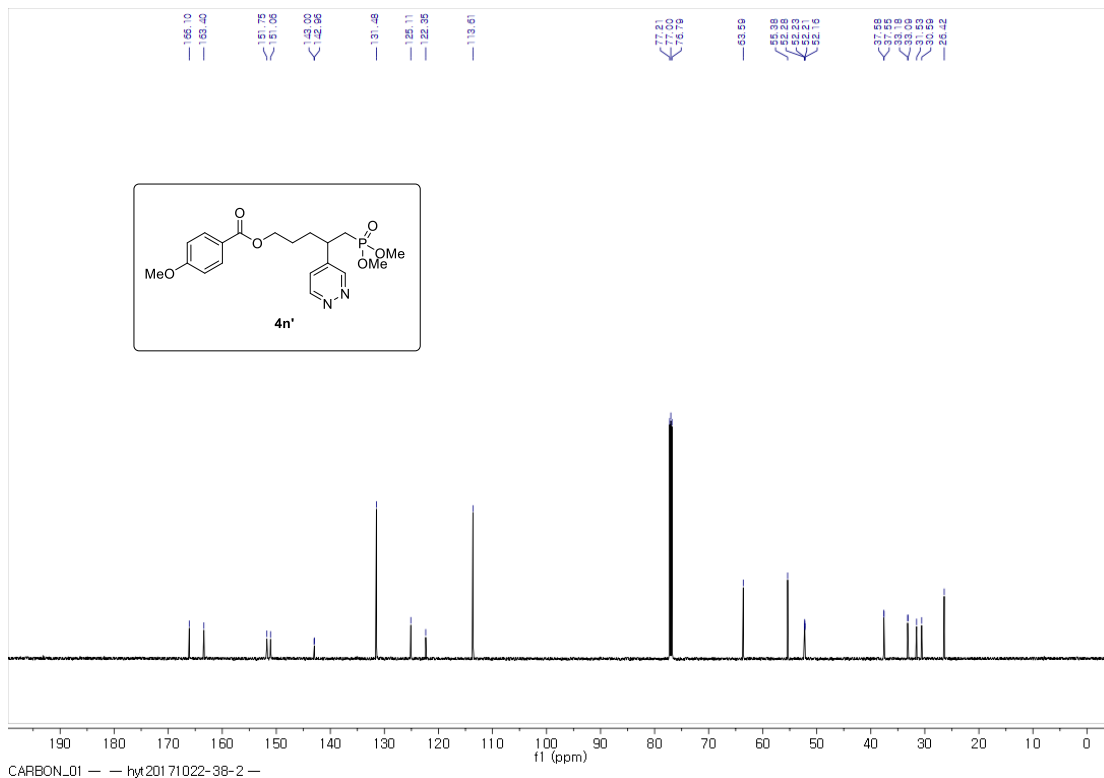

### 150 MHz, <sup>13</sup>C NMR in CDCl<sub>3</sub>



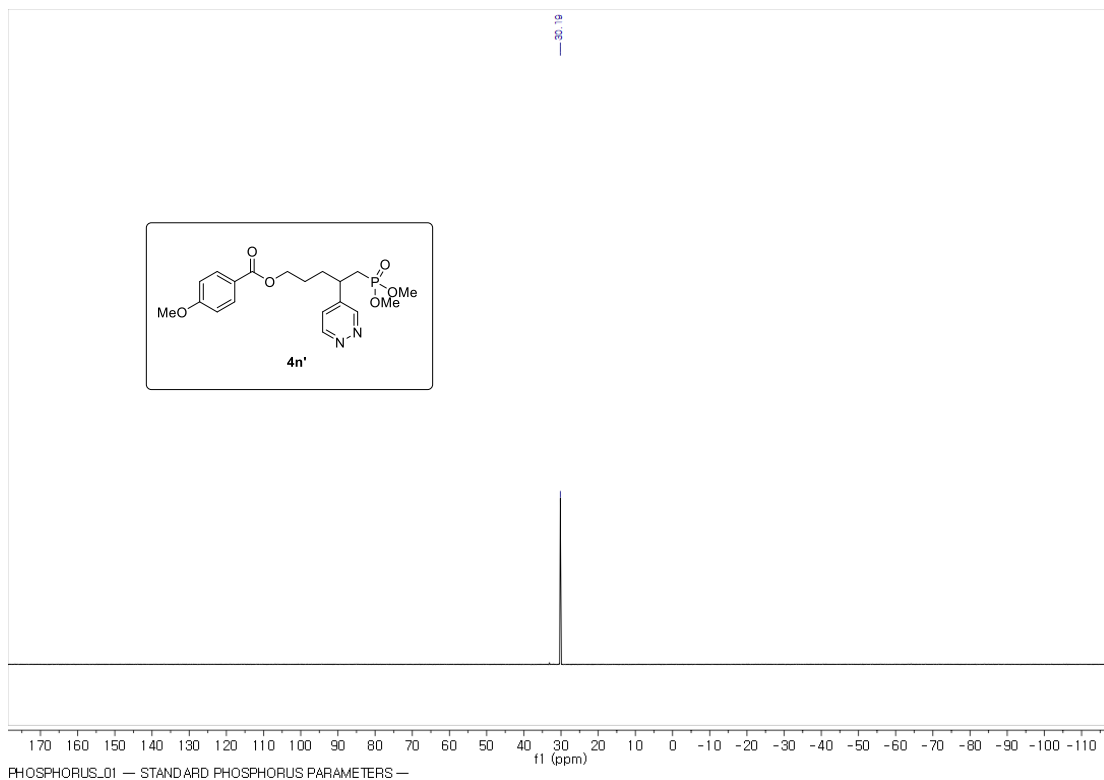

243 MHz, <sup>31</sup>P NMR in CDCl<sub>3</sub>

## 5-(dimethoxyphosphoryl)-4-(isoquinolin-1-yl)pentyl 4-methoxybenzoate (4o).

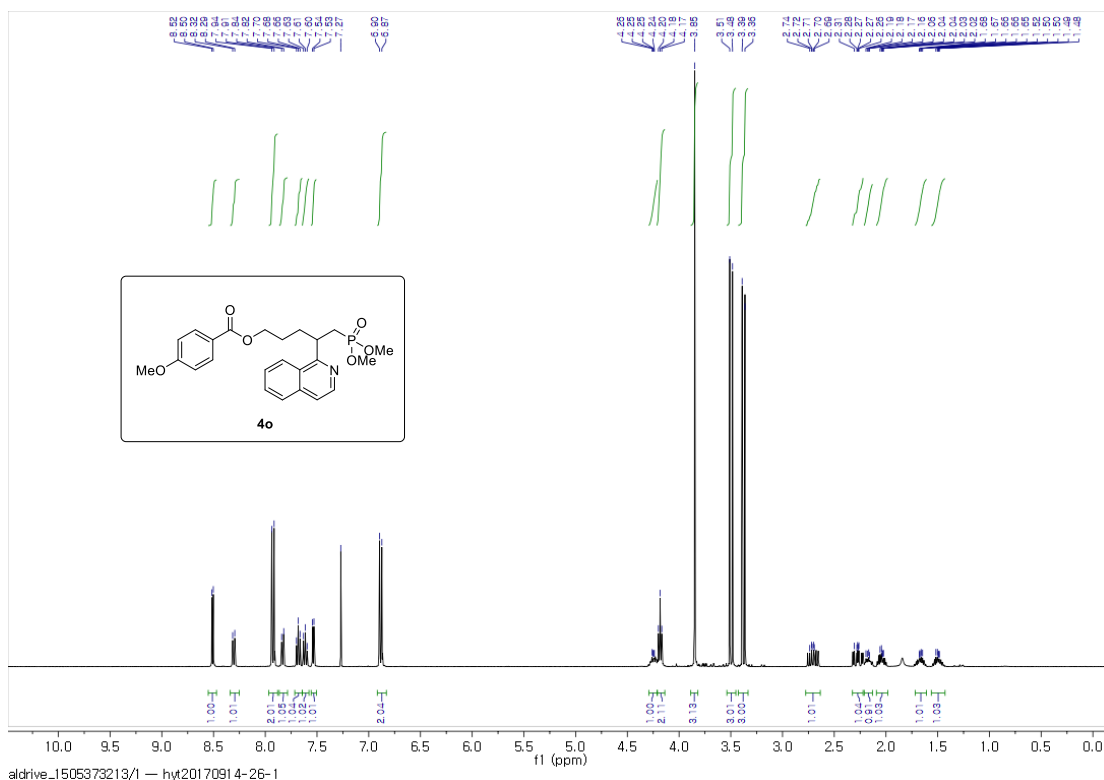

## 400 MHz, <sup>1</sup>H NMR in CDCl<sub>3</sub>

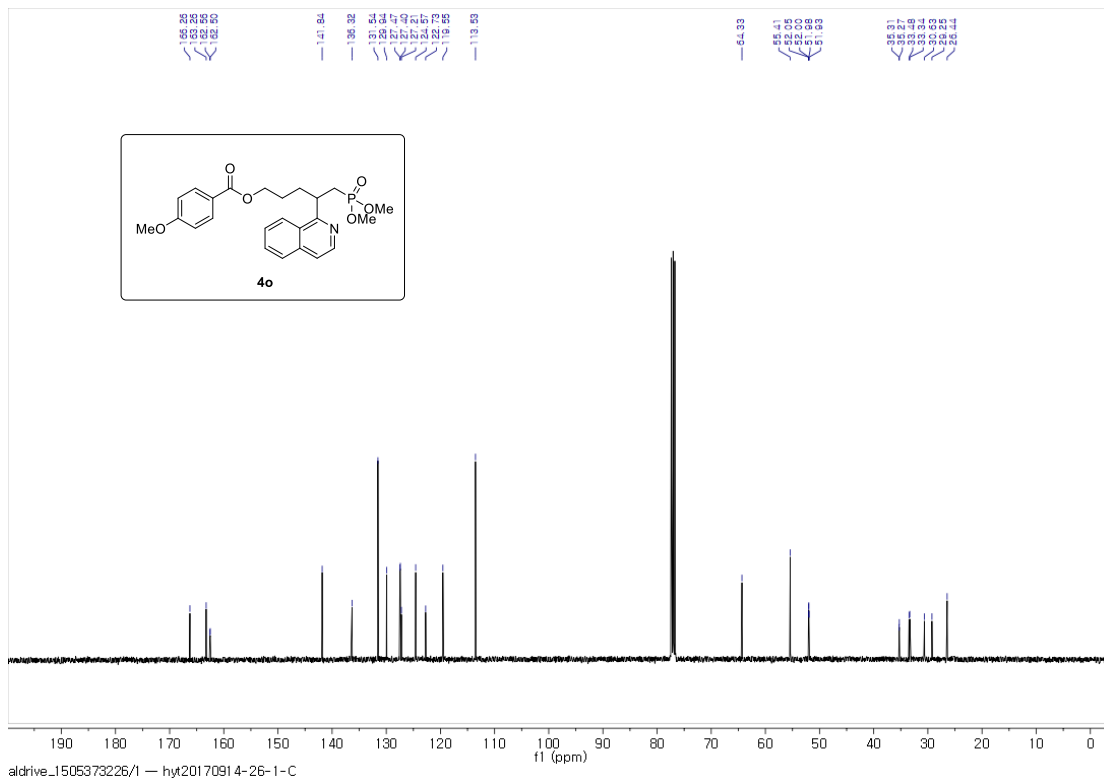

## 100 MHz, <sup>13</sup>C NMR in CDCl<sub>3</sub>

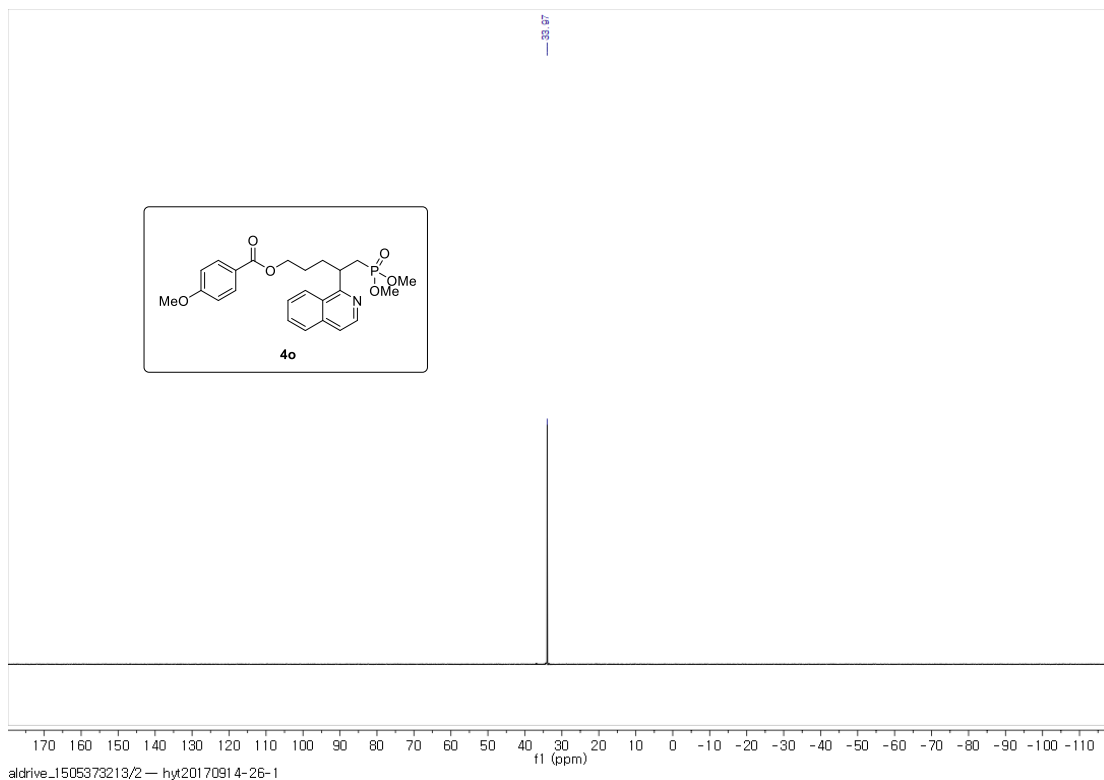

243 MHz,  $^{31}\text{P}$  NMR in  $\text{CDCl}_3$

### 5-(dimethoxyphosphoryl)-4-(2-methylquinolin-4-yl)pentyl 4-methoxybenzoate (4p)

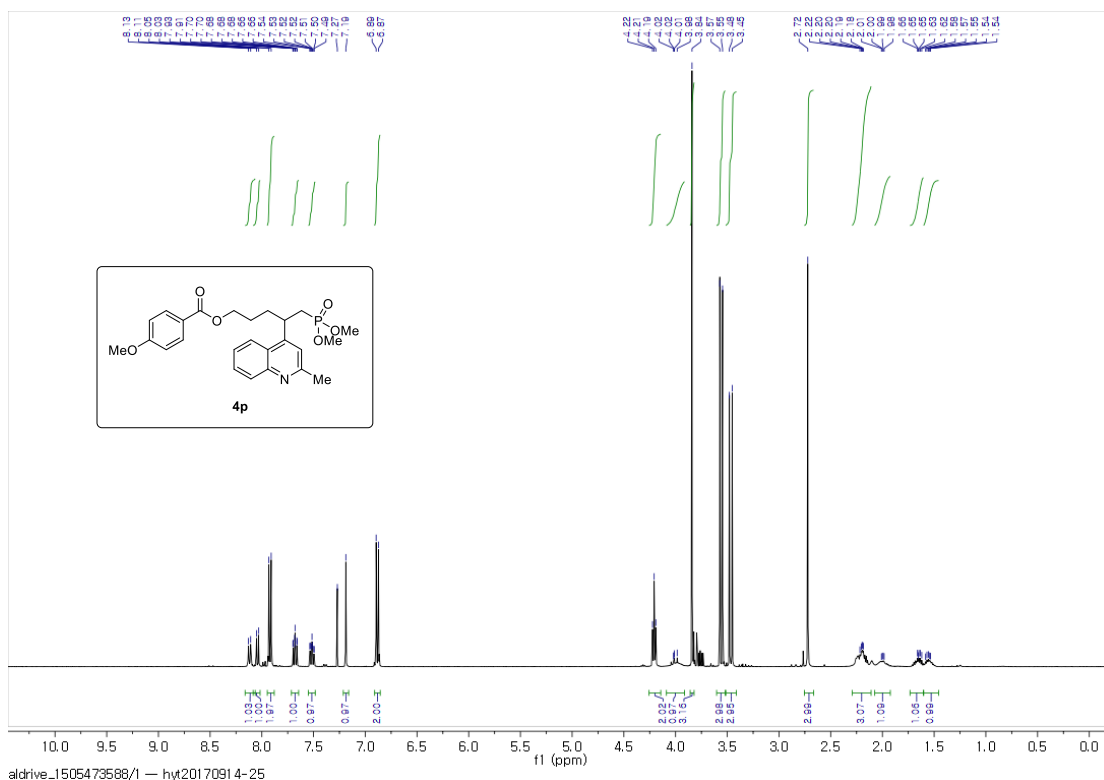

### 400 MHz, <sup>1</sup>H NMR in CDCl<sub>3</sub>

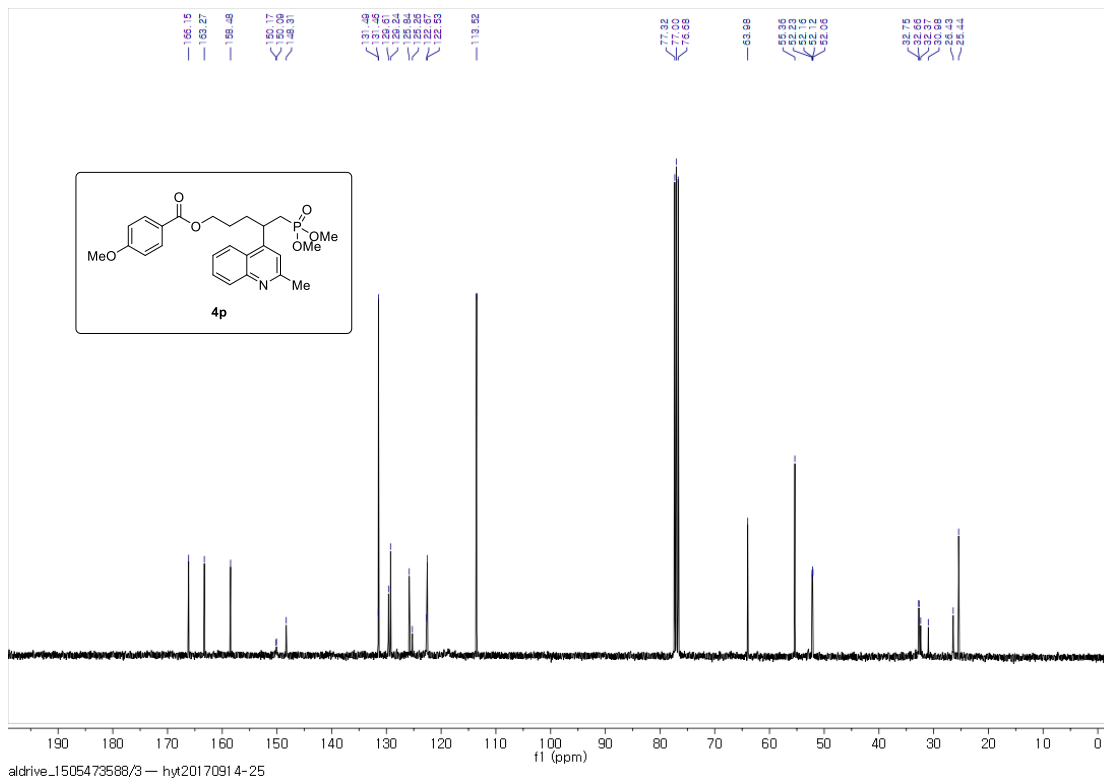

### 100 MHz, <sup>13</sup>C NMR in CDCl<sub>3</sub>

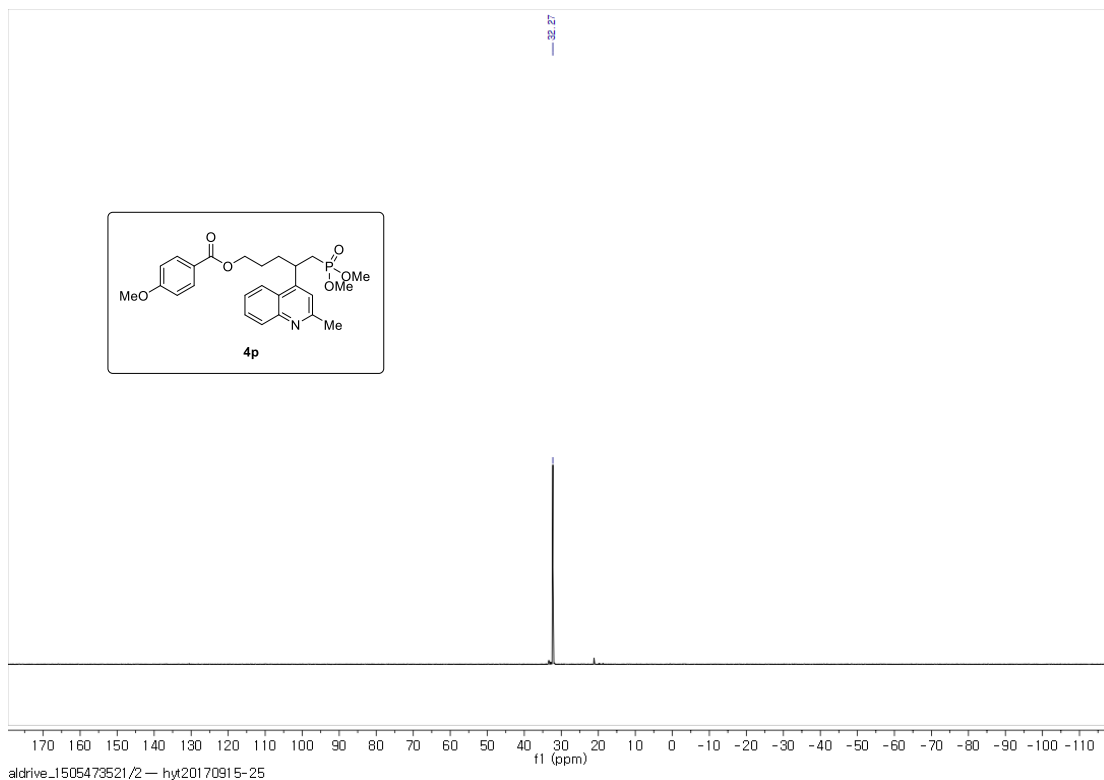

**162 MHz,  $^{31}\text{P}$  NMR in  $\text{CDCl}_3$**

### 5-(dimethoxyphosphoryl)-4-(4-methylquinolin-2-yl)pentyl 4-methoxybenzoate (4q)

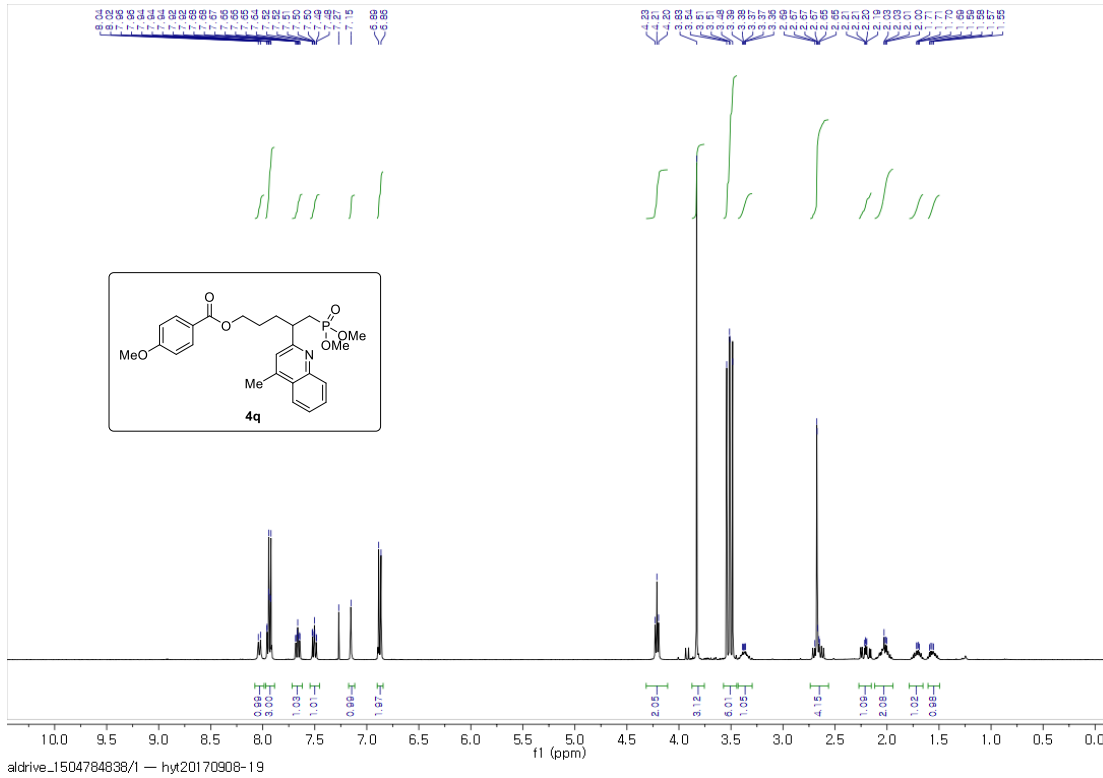

### 400 MHz, <sup>1</sup>H NMR in CDCl<sub>3</sub>

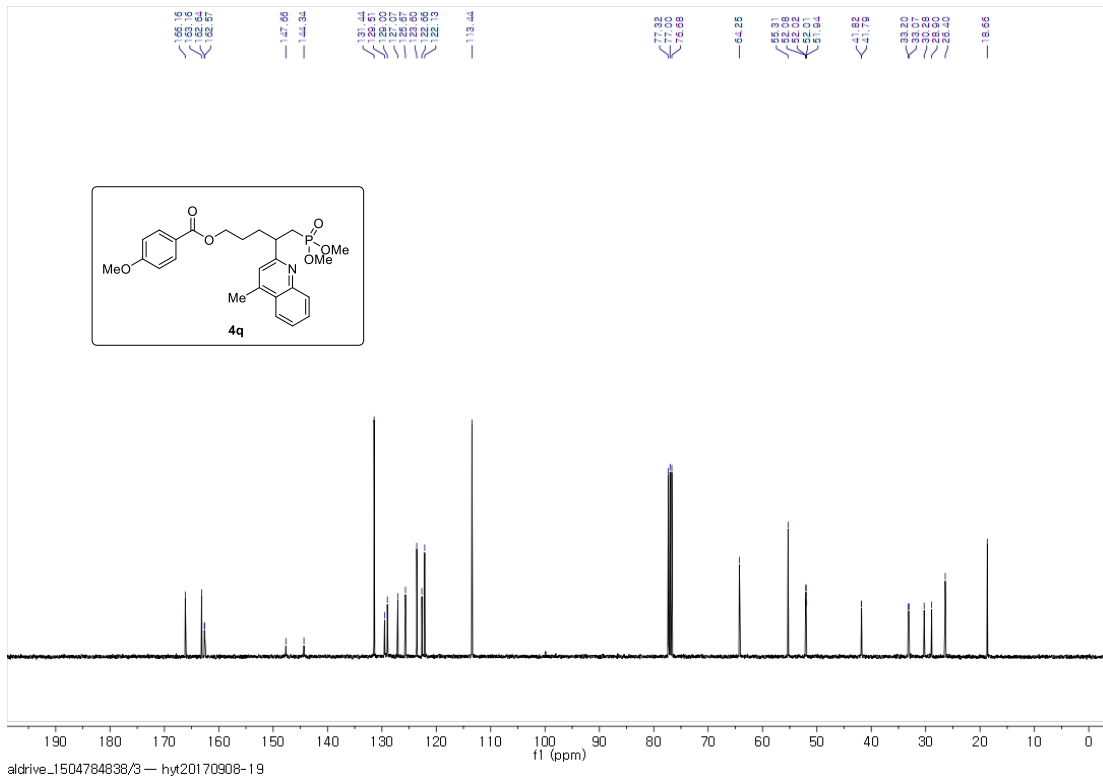

### 100 MHz, <sup>13</sup>C NMR in CDCl<sub>3</sub>

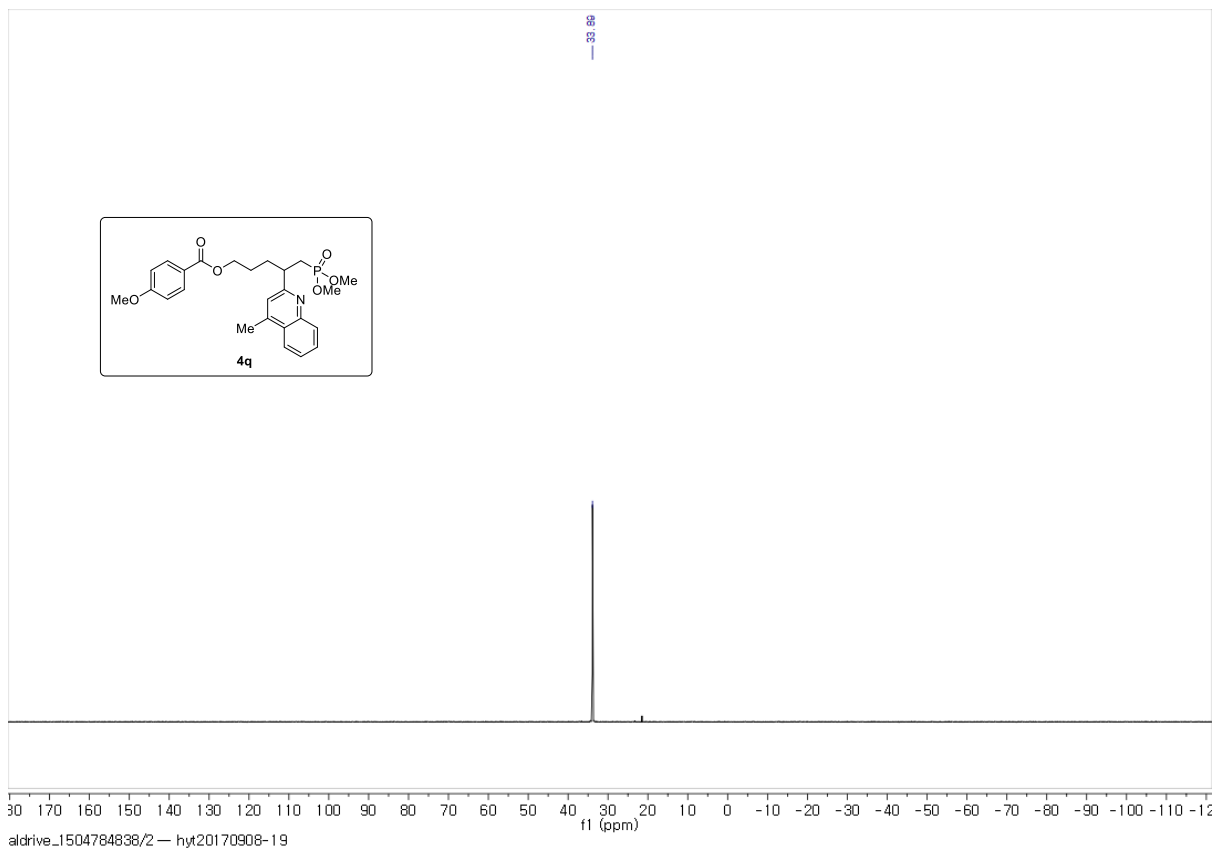

162 MHz,  $^{31}\text{P}$  NMR in  $\text{CDCl}_3$

### 4-(benzo[h]quinolin-2-yl)-5-(dimethoxyphosphoryl)pentyl 4-methoxybenzoate (4r)

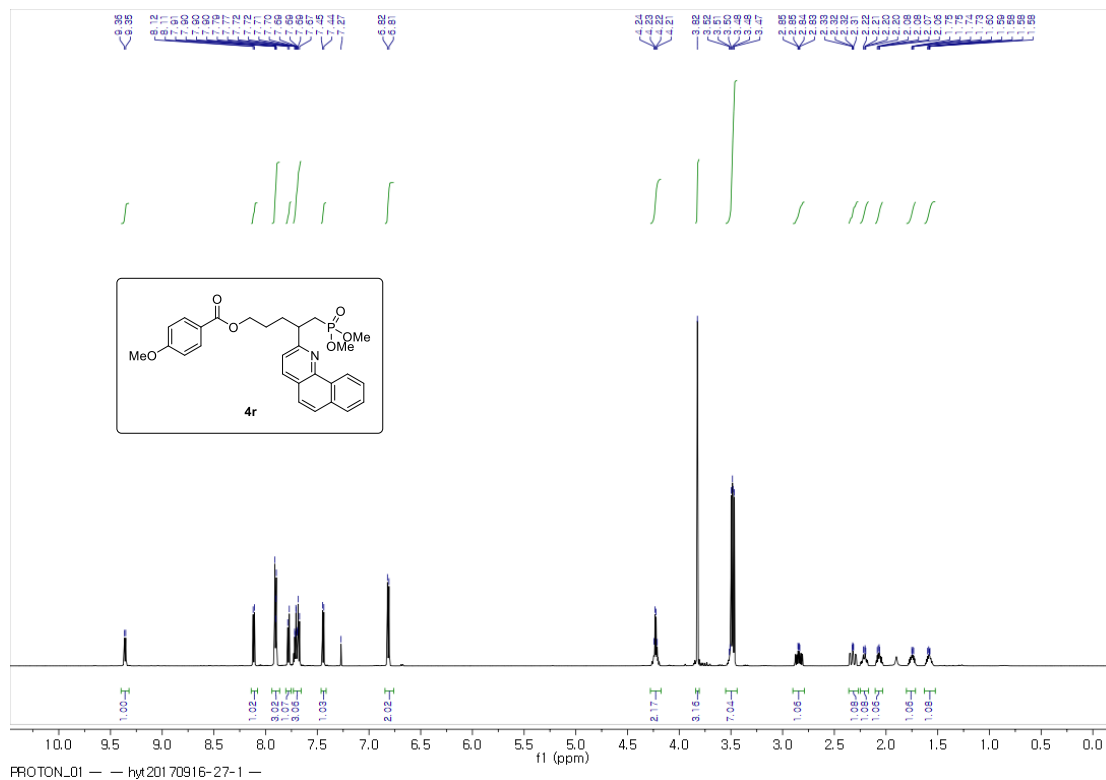

### 600 MHz, <sup>1</sup>H NMR in CDCl<sub>3</sub>

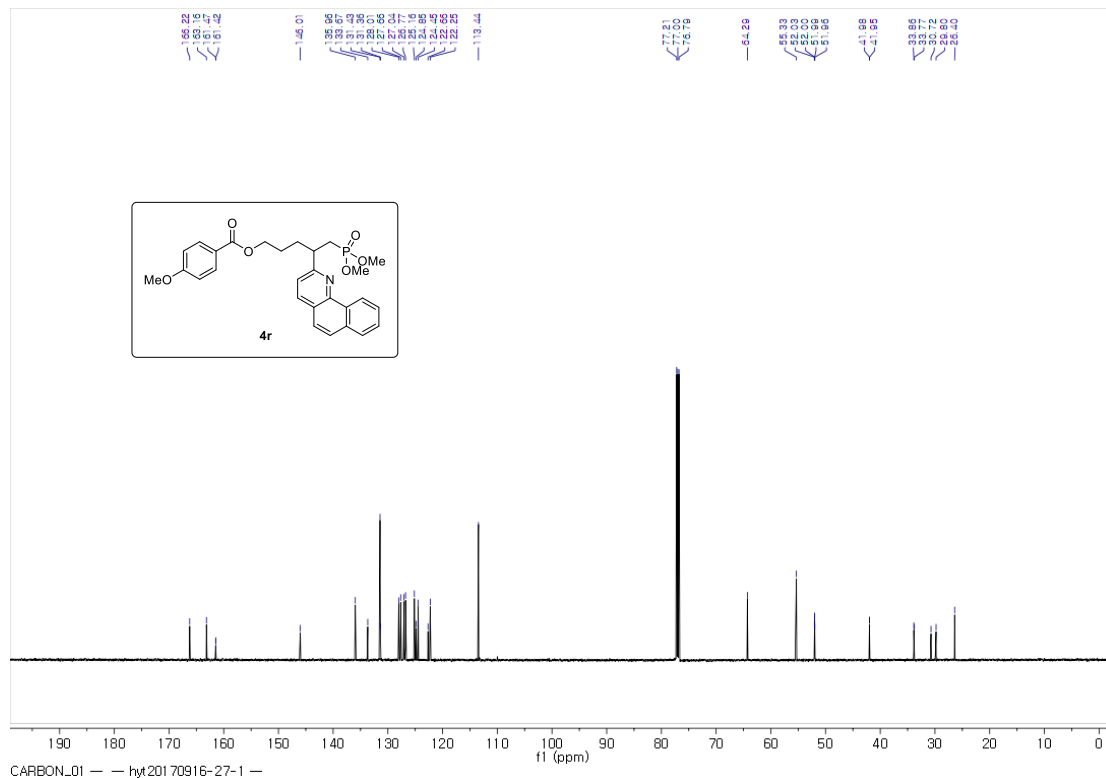

### 150 MHz, <sup>13</sup>C NMR in CDCl<sub>3</sub>



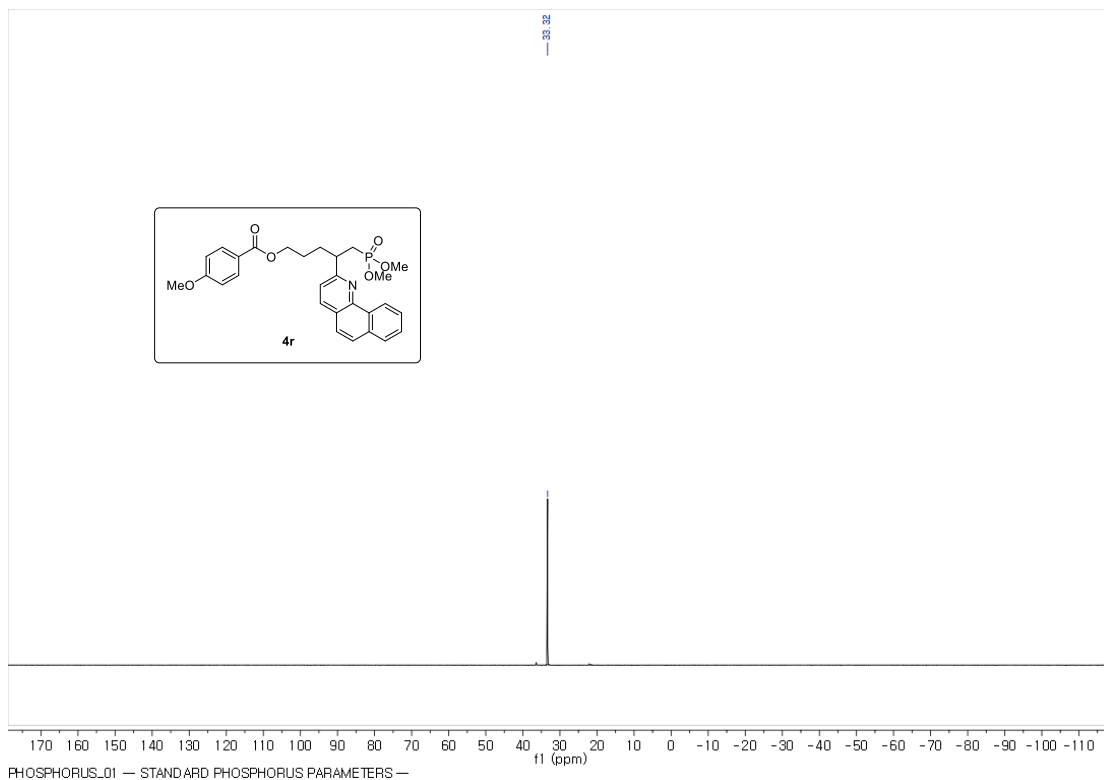

243 MHz,  $^{31}\text{P}$  NMR in  $\text{CDCl}_3$

### 4-(benzo[h]quinolin-4-yl)-5-(dimethoxyphosphoryl)pentyl 4-methoxybenzoate (4r')

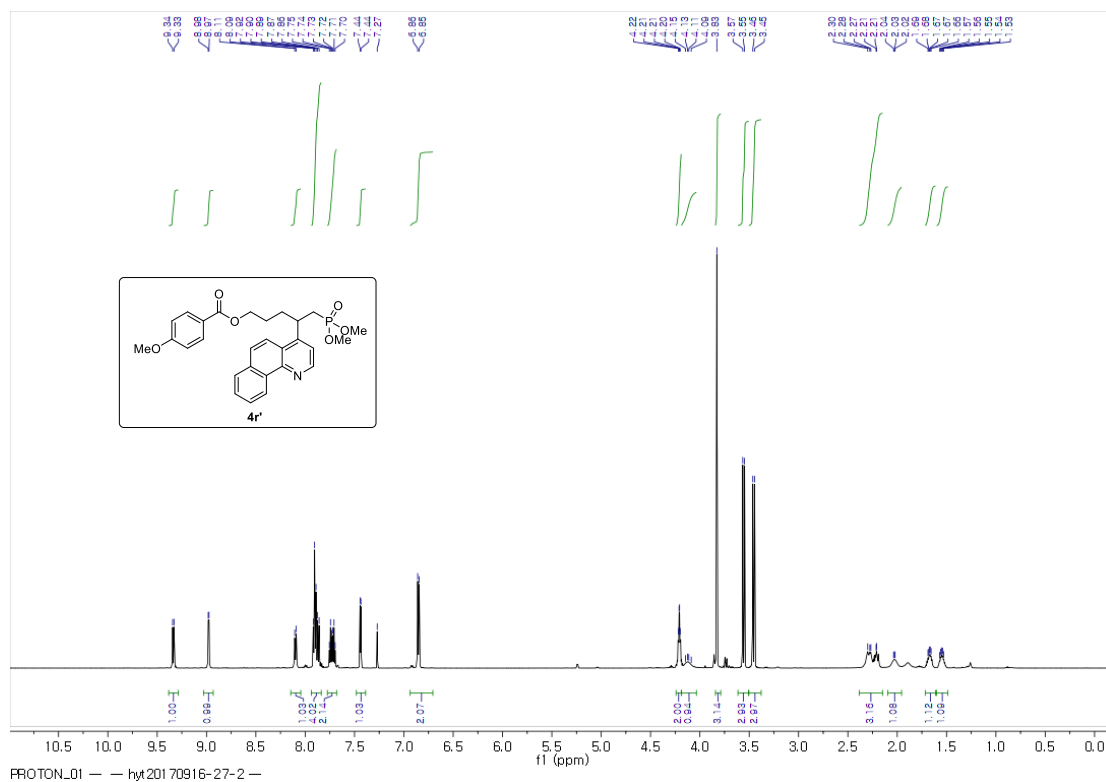

### 600 MHz, $^1\text{H}$ NMR in $\text{CDCl}_3$

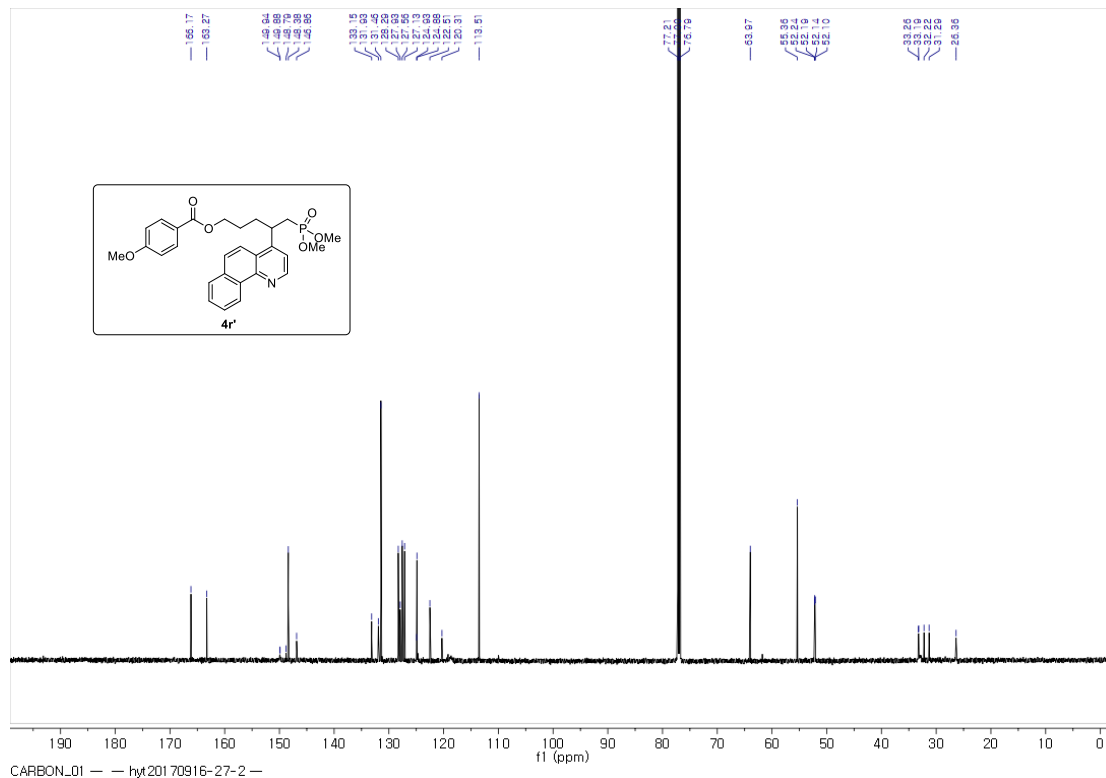

### 150 MHz, $^{13}\text{C}$ NMR in $\text{CDCl}_3$

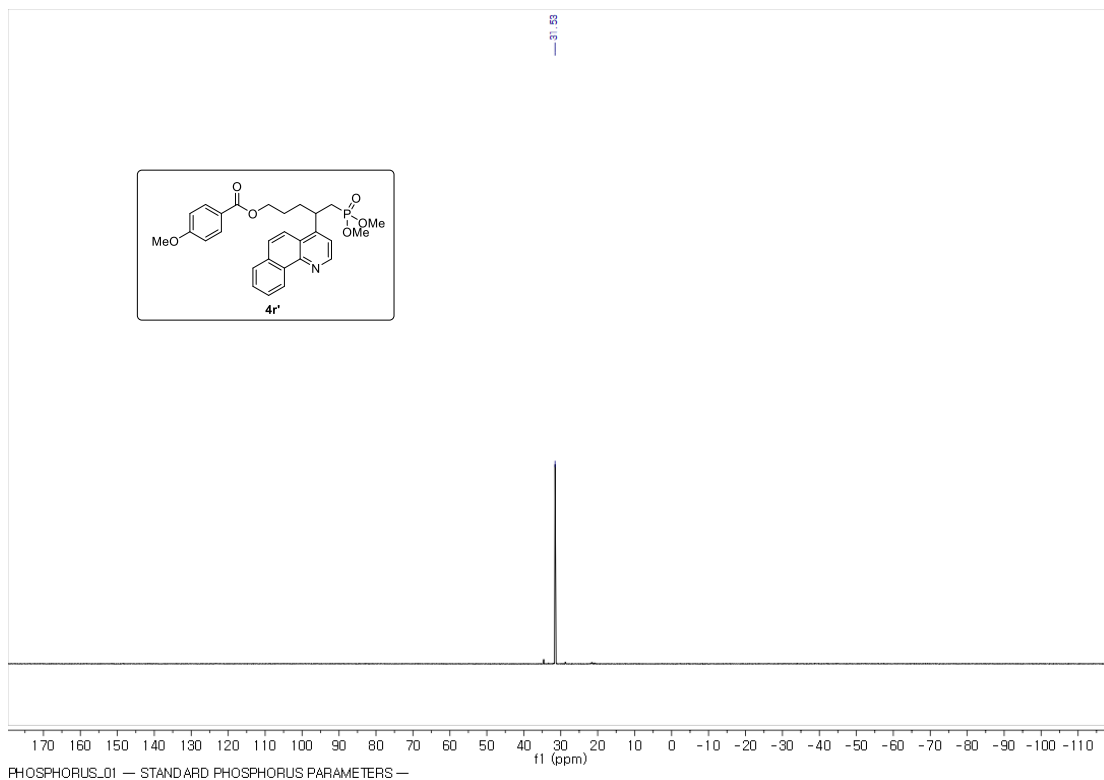

243 MHz,  $^{31}\text{P}$  NMR in  $\text{CDCl}_3$

### 5-(diethoxyphosphoryl)-4-(4-methylpyridin-2-yl)pentyl 4-methoxybenzoate (4s)

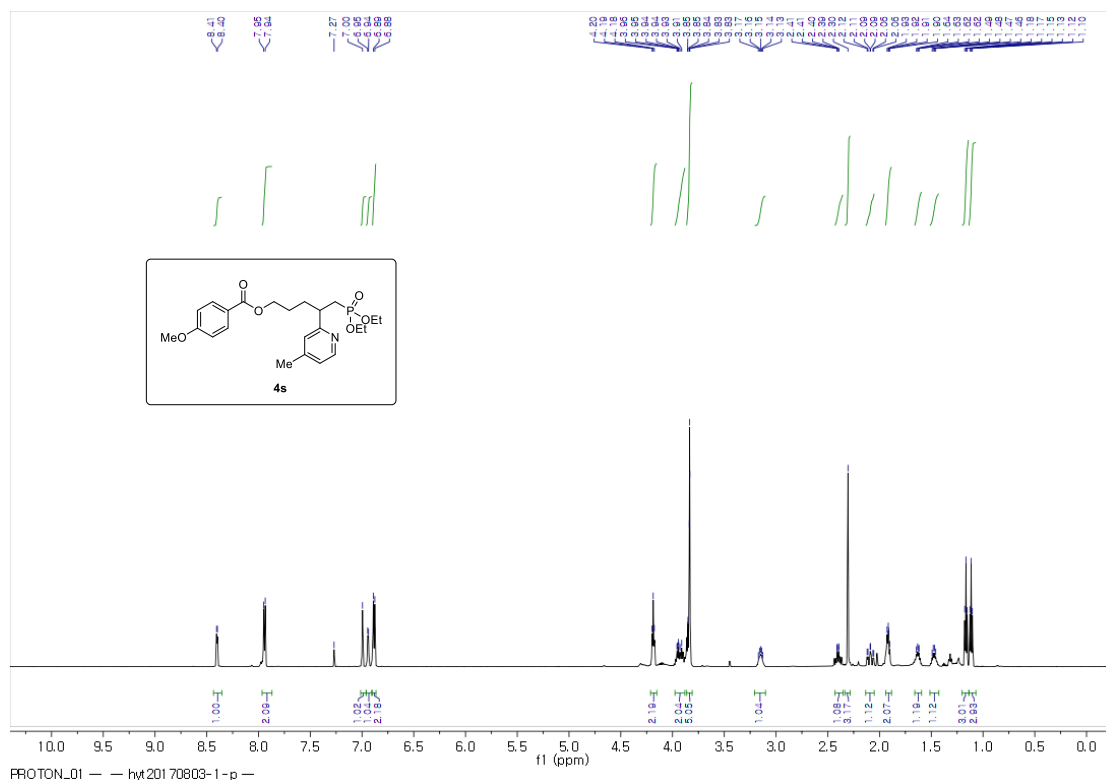

### 600 MHz, <sup>1</sup>H NMR in CDCl<sub>3</sub>

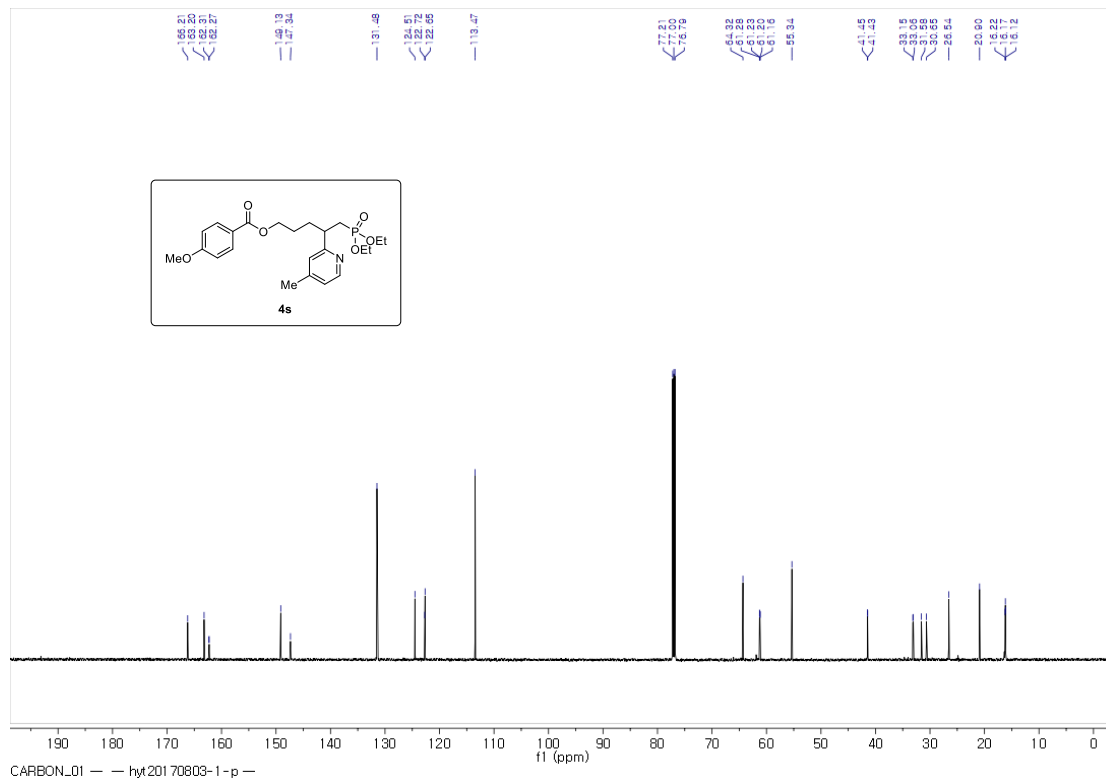

### 150 MHz, <sup>13</sup>C NMR in CDCl<sub>3</sub>

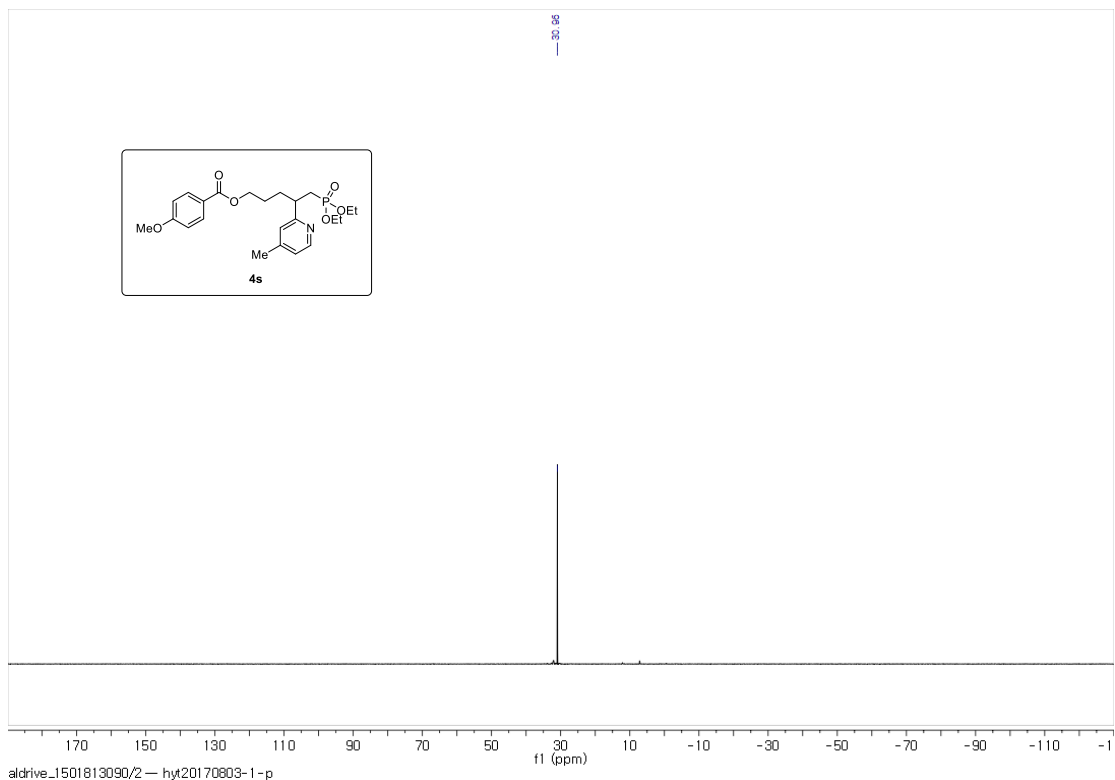

162 MHz,  $^{31}\text{P}$  NMR in  $\text{CDCl}_3$

**5-(diisopropoxyphosphoryl)-4-(4-methylpyridin-2-yl)pentyl 4-methoxybenzoate (4t)**

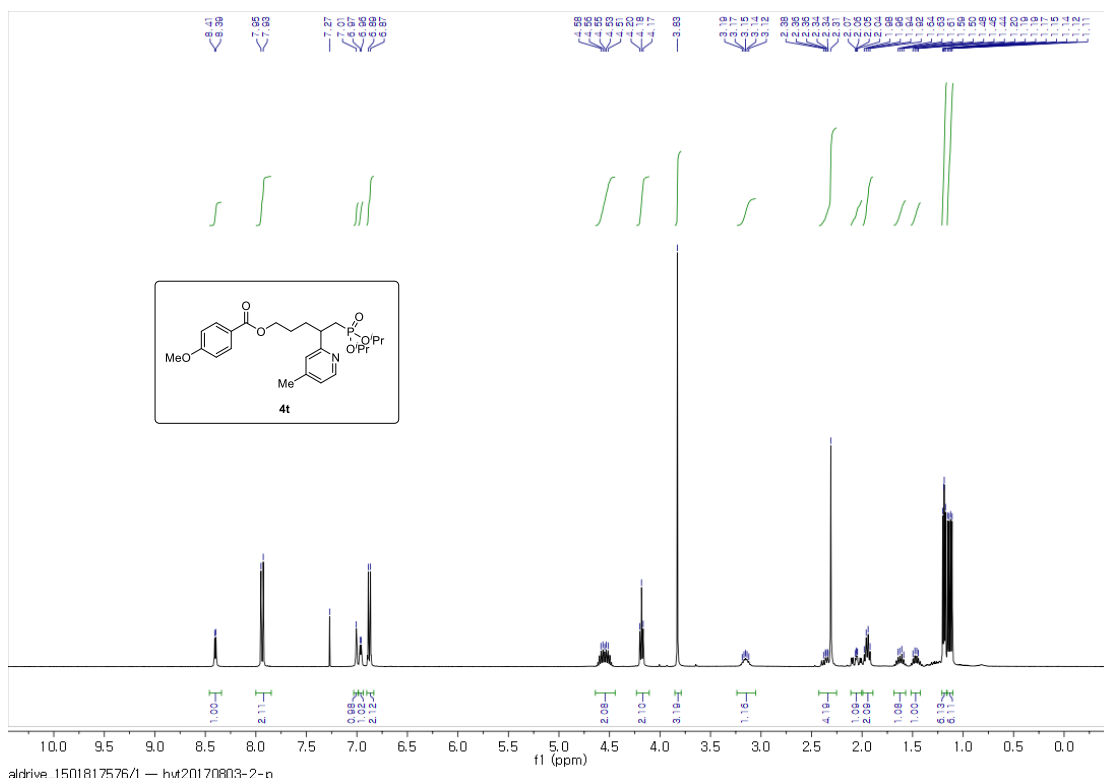

**400 MHz, <sup>1</sup>H NMR in CDCl<sub>3</sub>**

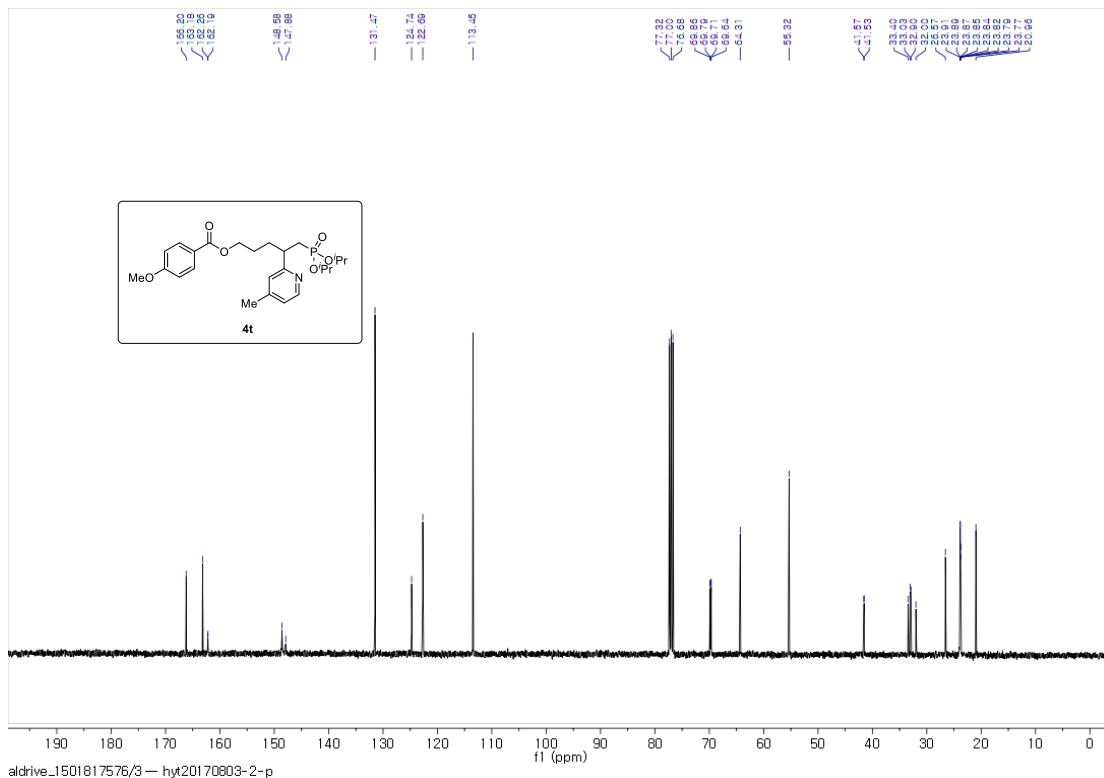

**100 MHz, <sup>13</sup>C NMR in CDCl<sub>3</sub>**

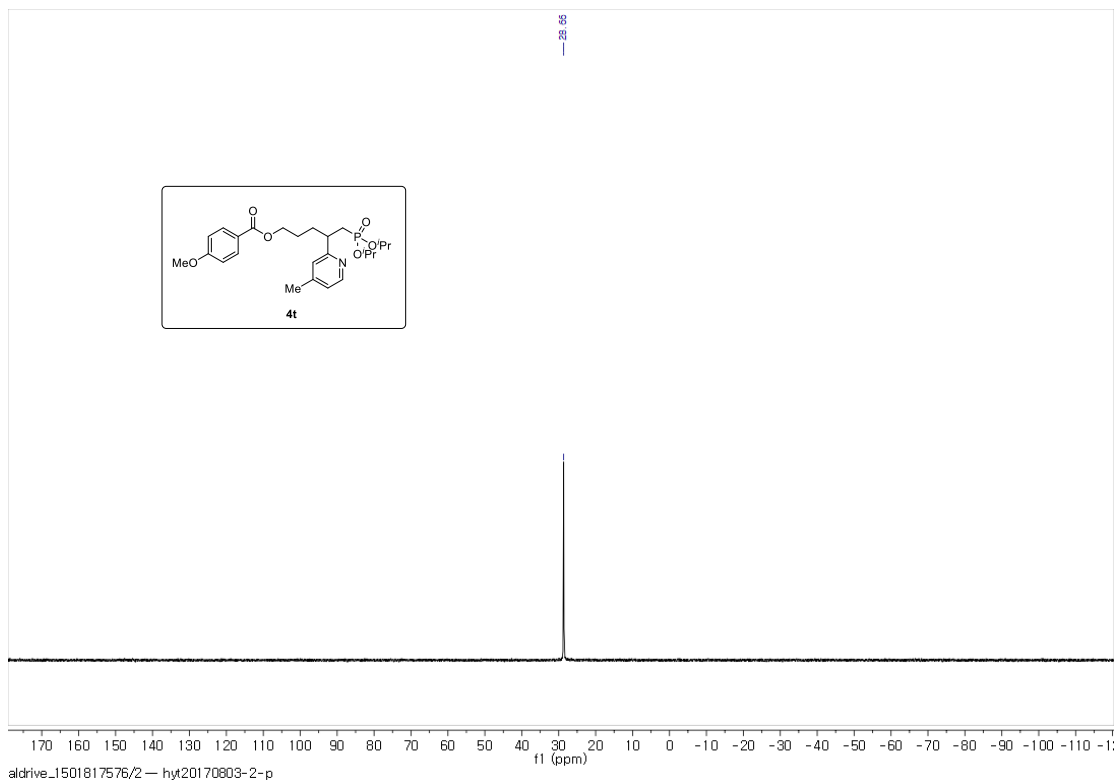

162 MHz,  $^{31}\text{P}$  NMR in  $\text{CDCl}_3$

### 5-(diisobutoxyphosphoryl)-4-(4-methylpyridin-2-yl)pentyl 4-methoxybenzoate (4u)

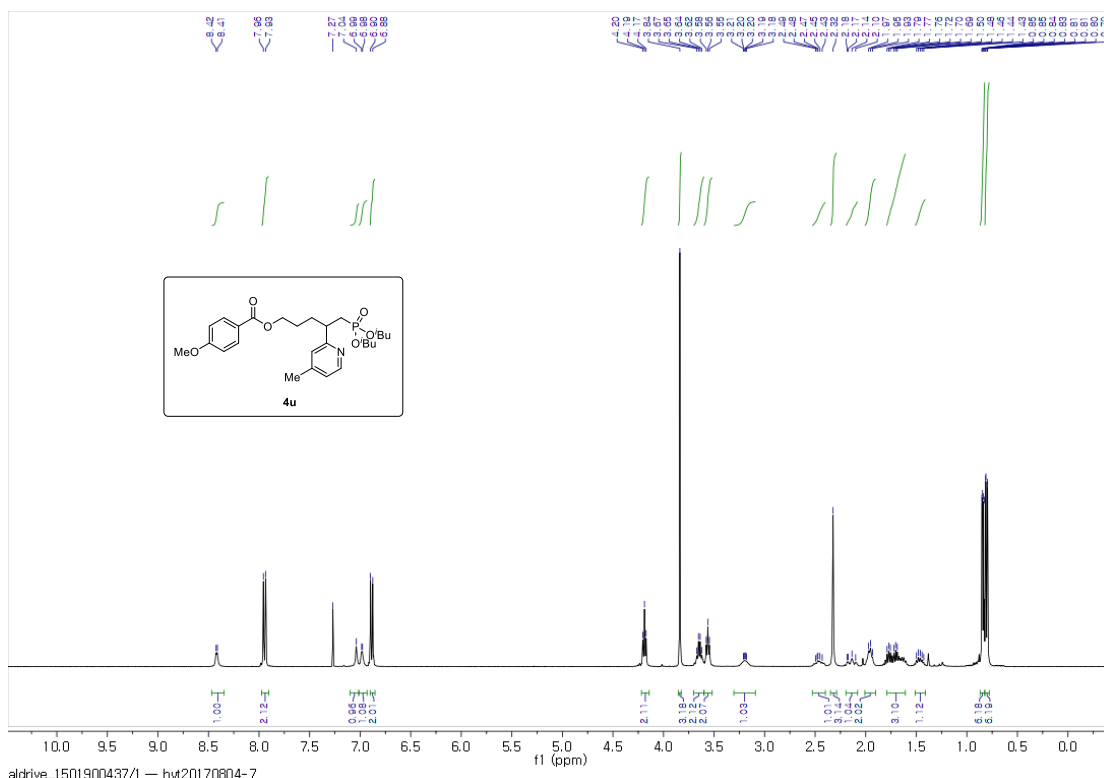

### 400 MHz, <sup>1</sup>H NMR in CDCl<sub>3</sub>

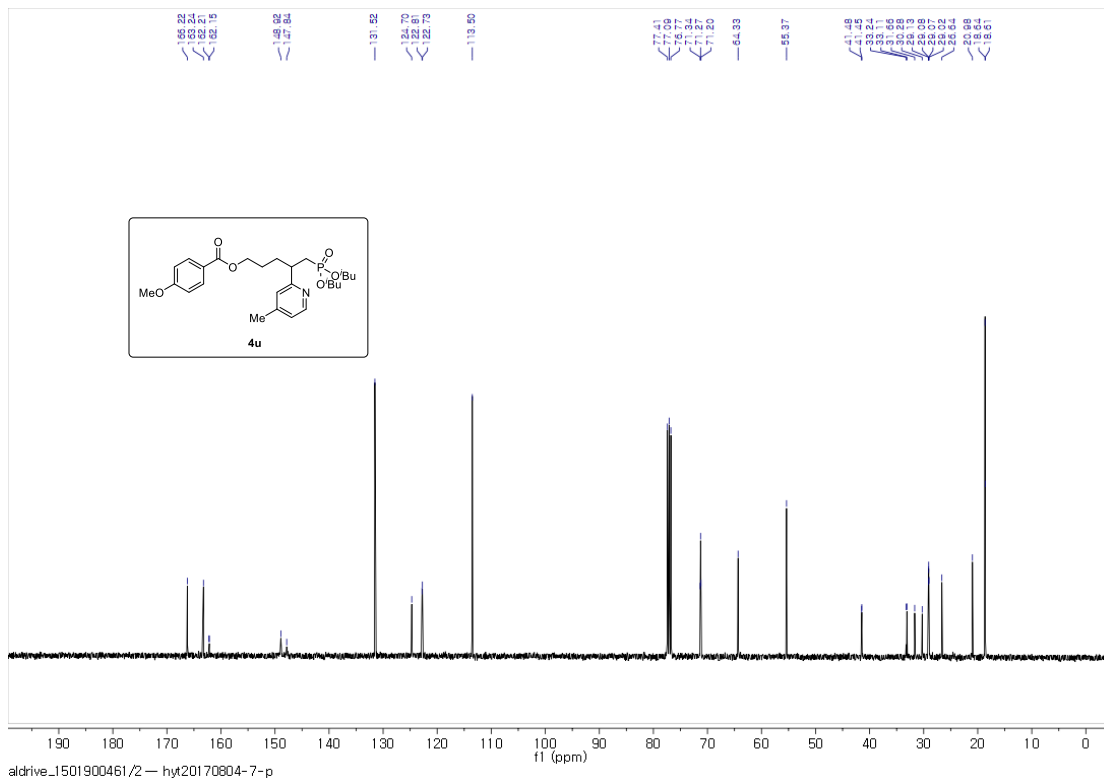

### 100 MHz, <sup>13</sup>C NMR in CDCl<sub>3</sub>



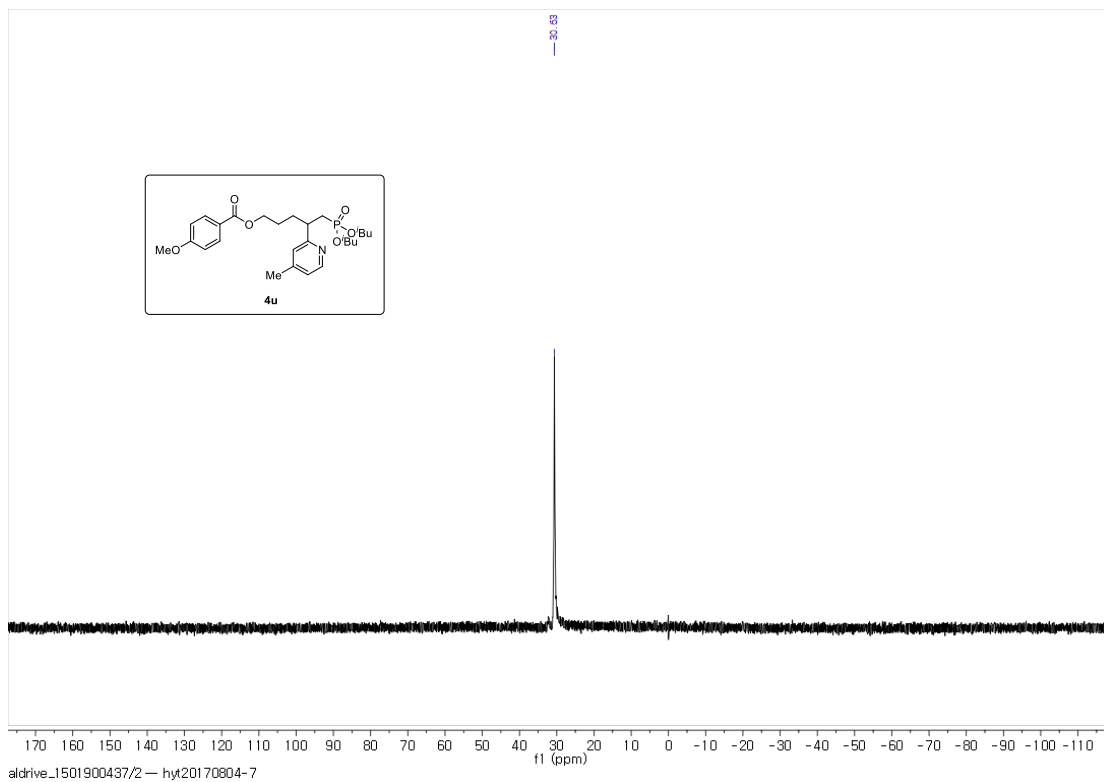

162 MHz,  $^{31}\text{P}$  NMR in  $\text{CDCl}_3$

### 5-(dibutoxyphosphoryl)-4-(4-methylpyridin-2-yl)pentyl 4-methoxybenzoate (4v)

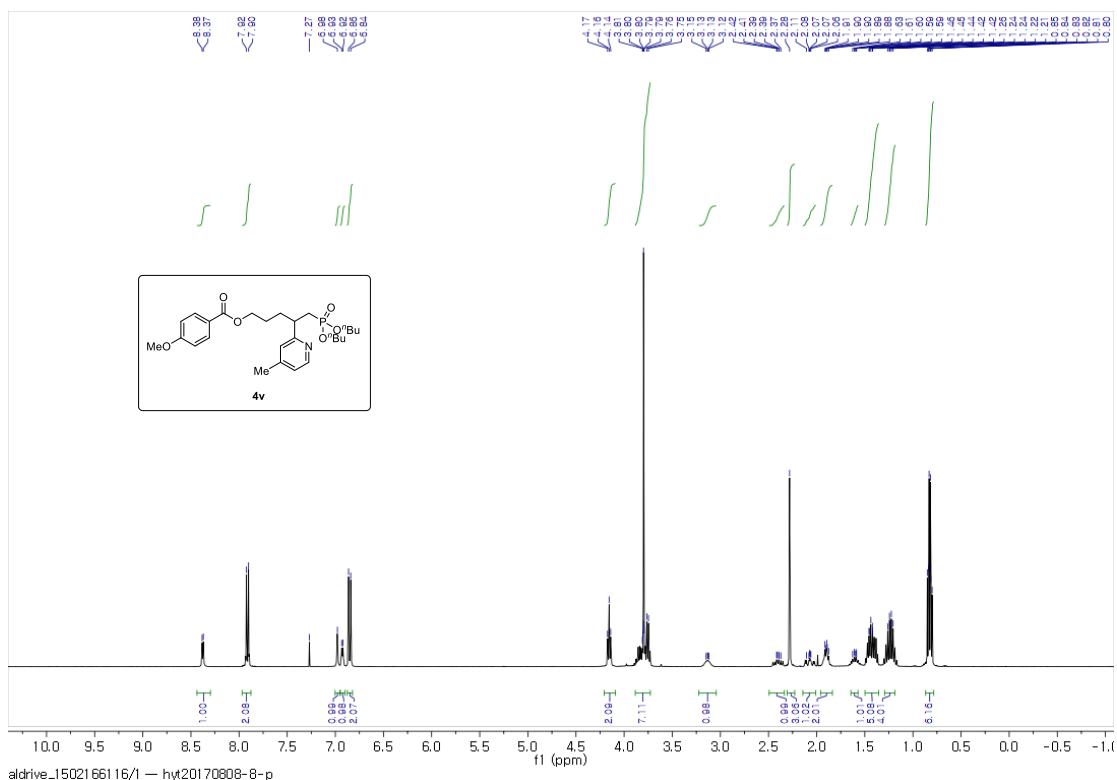

### 400 MHz, <sup>1</sup>H NMR in CDCl<sub>3</sub>

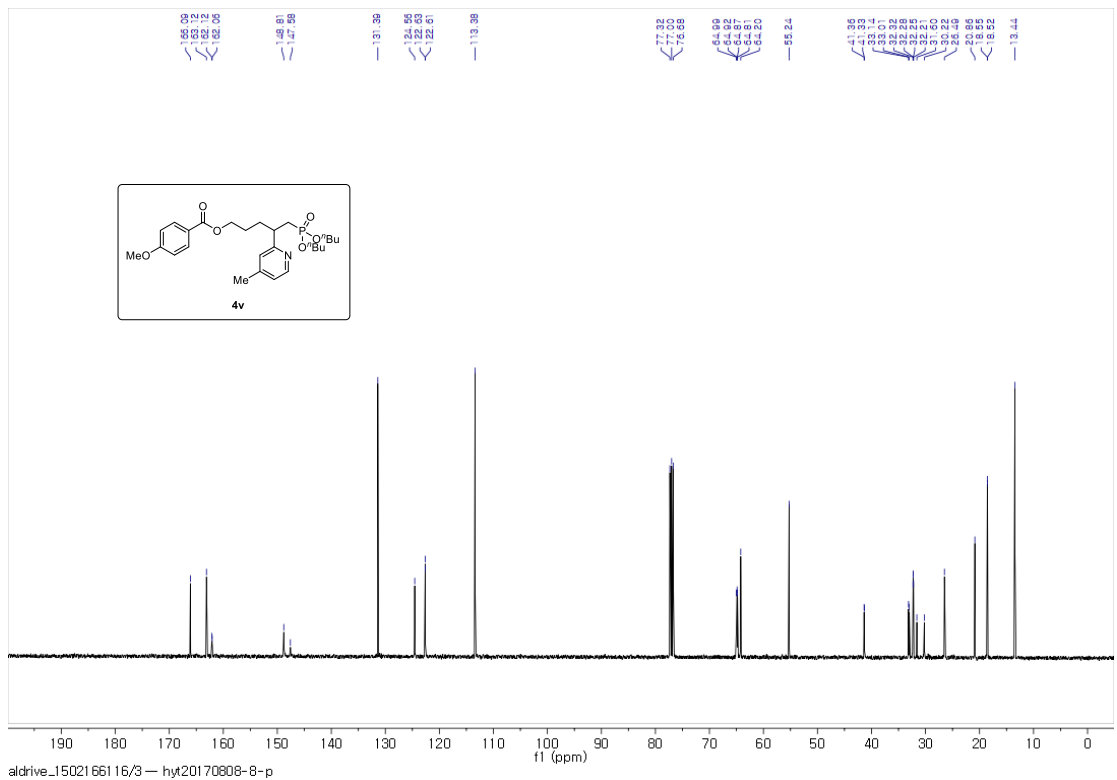

### 100 MHz, <sup>13</sup>C NMR in CDCl<sub>3</sub>

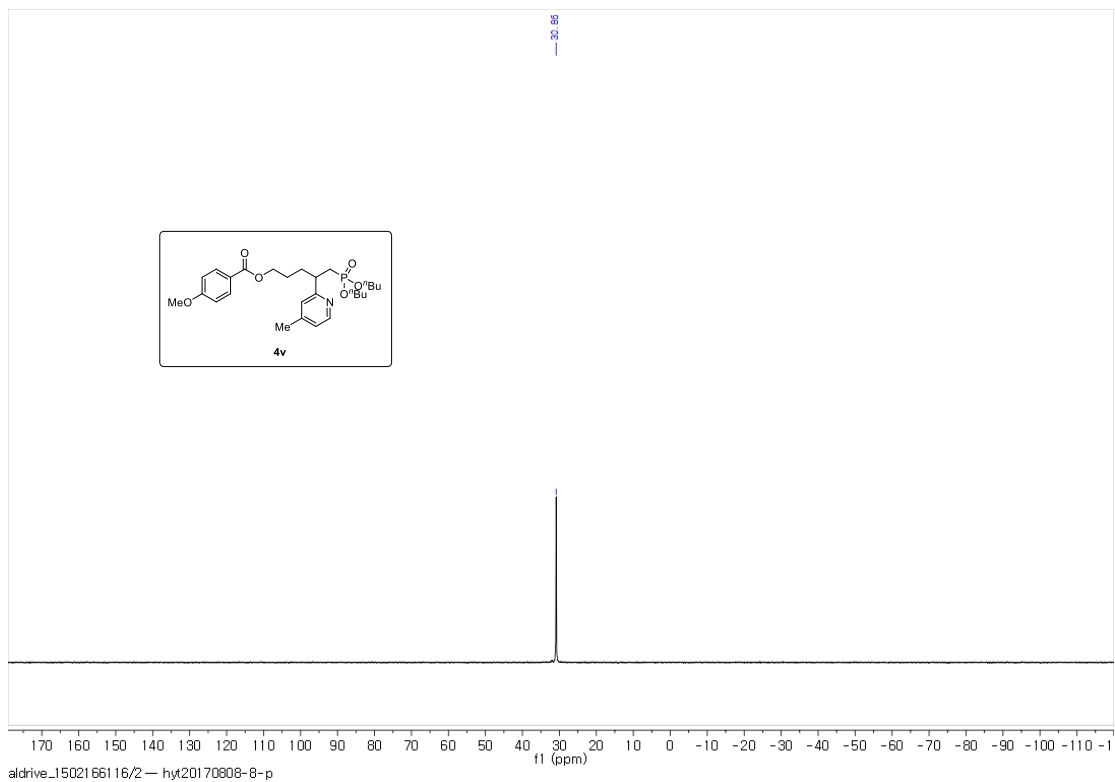

**162 MHz,  $^{31}\text{P}$  NMR in  $\text{CDCl}_3$**

### 5-(di-tert-butylphosphoryl)-4-(4-methylpyridin-2-yl)pentyl 4-methoxybenzoate (4w)

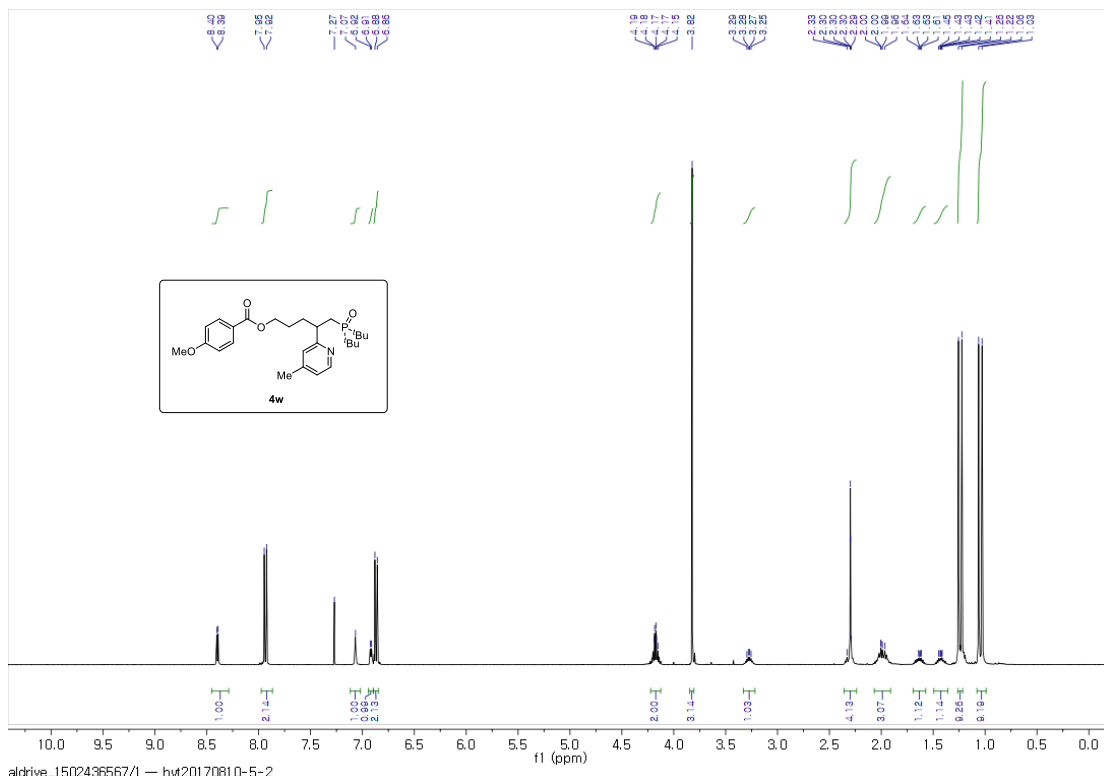

### 400 MHz, <sup>1</sup>H NMR in CDCl<sub>3</sub>

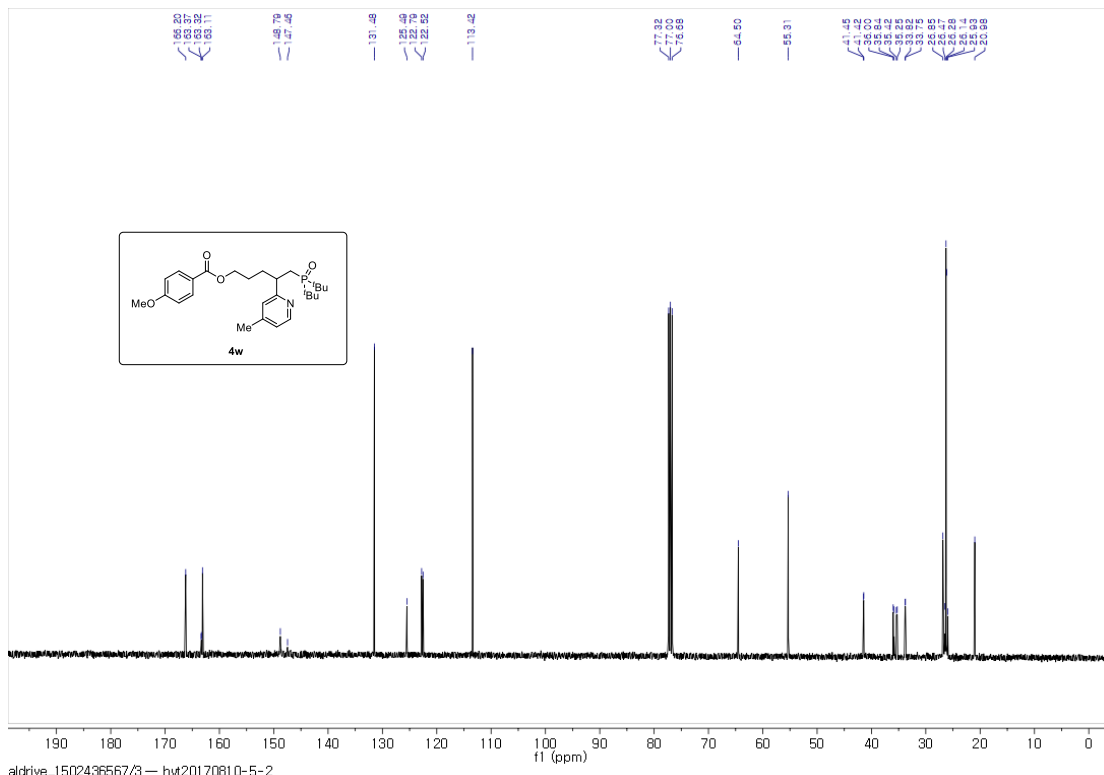

### 100 MHz, <sup>13</sup>C NMR in CDCl<sub>3</sub>

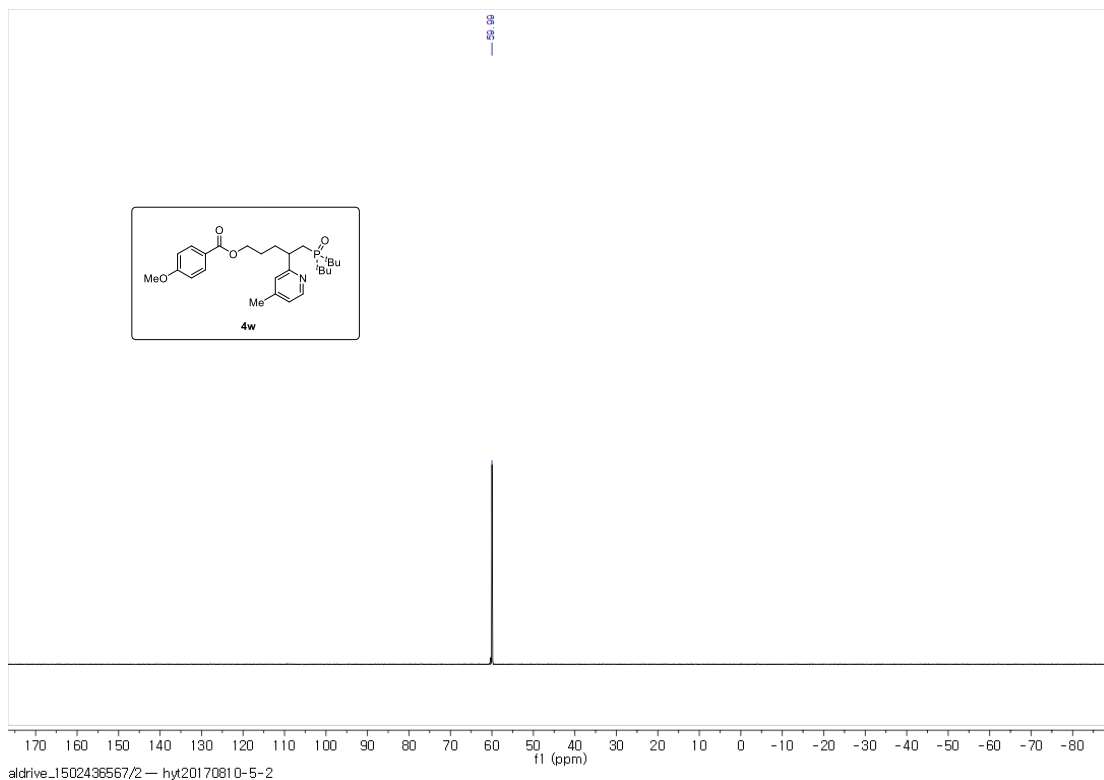

162 MHz,  $^{31}\text{P}$  NMR in  $\text{CDCl}_3$

**5-(dimethoxyphosphoryl)-4-(1-methyl-5-phenyl-1H-imidazol-2-yl)pentyl 4-methoxybenzoate (4x)**

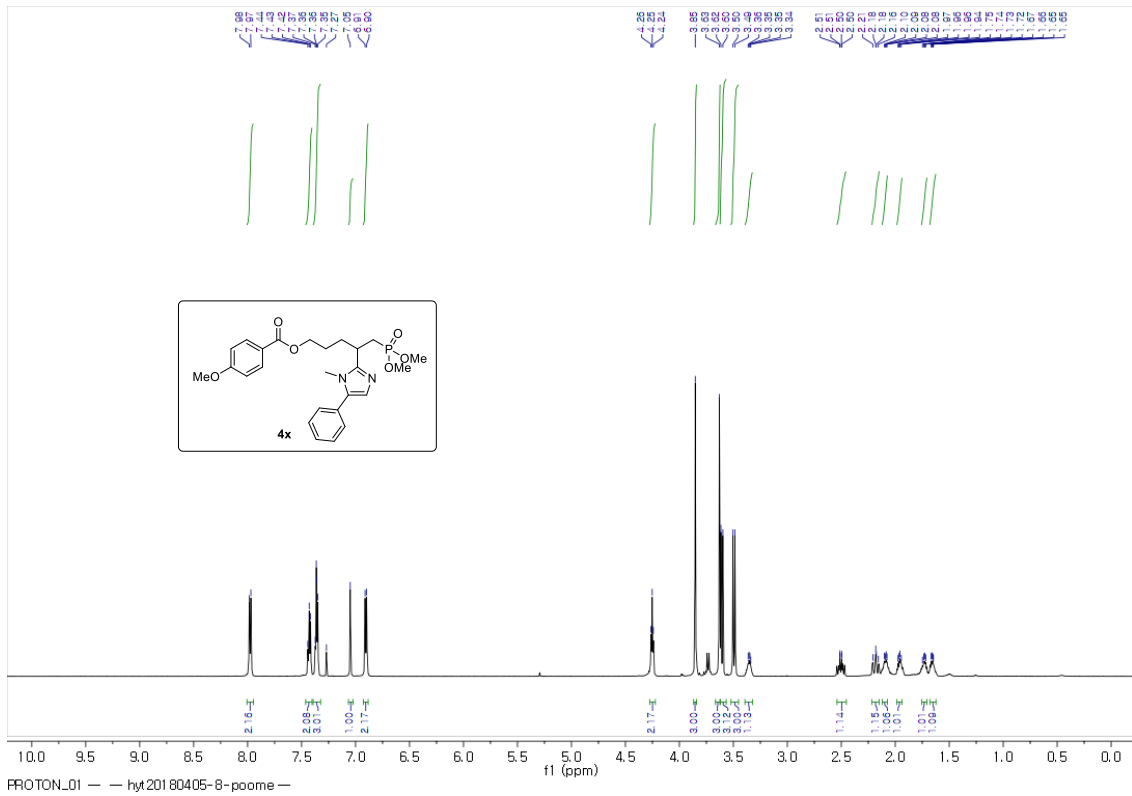

**600 MHz, <sup>1</sup>H NMR in CDCl<sub>3</sub>**

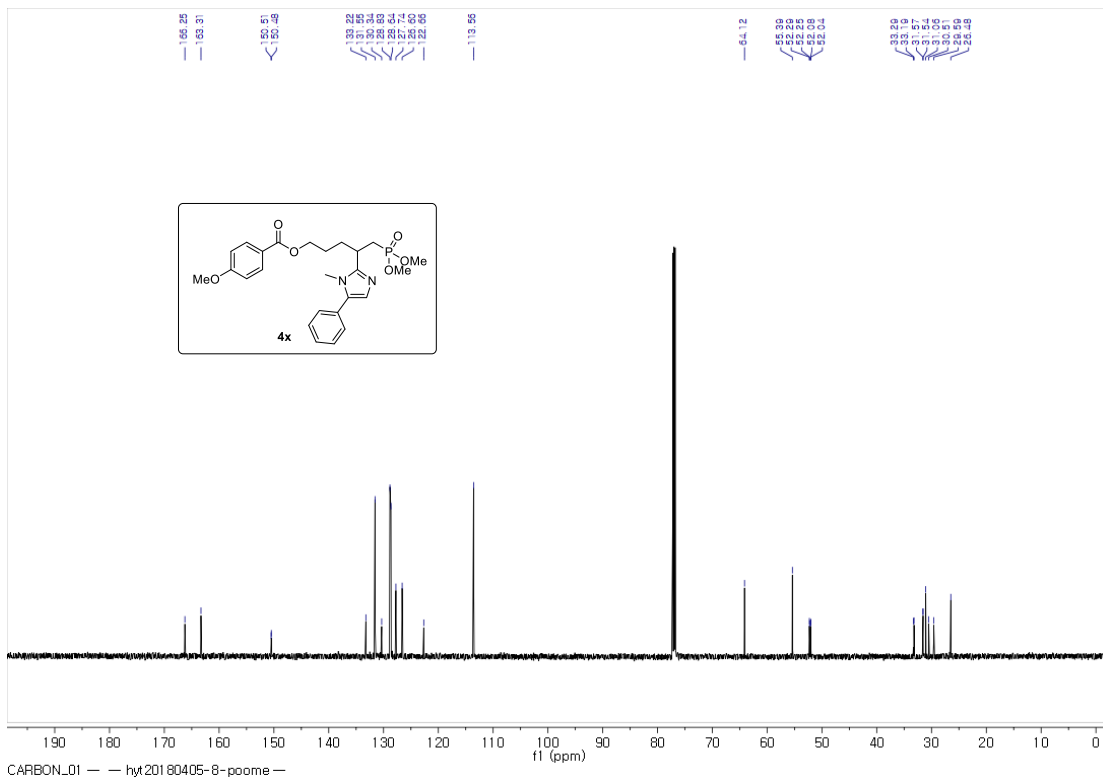

**150 MHz, <sup>13</sup>C NMR in CDCl<sub>3</sub>**

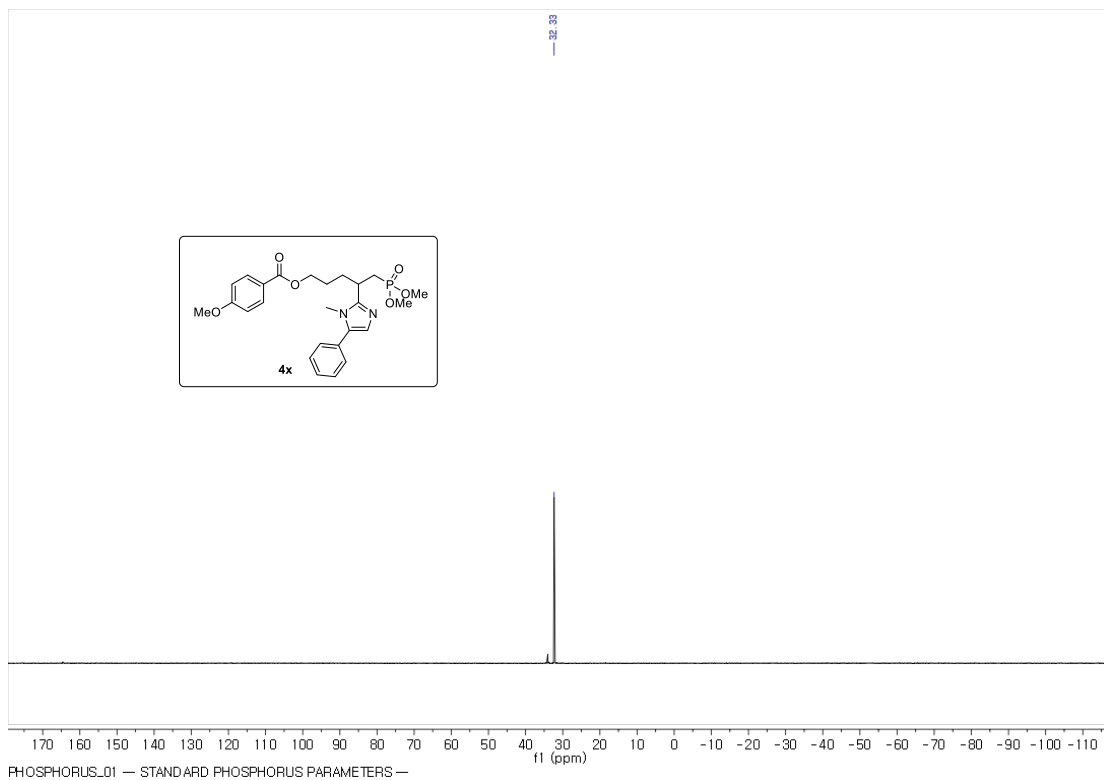

243 MHz,  $^{31}\text{P}$  NMR in  $\text{CDCl}_3$

### 5-(dimethoxyphosphoryl)pentyl 4-methoxybenzoate (5a)

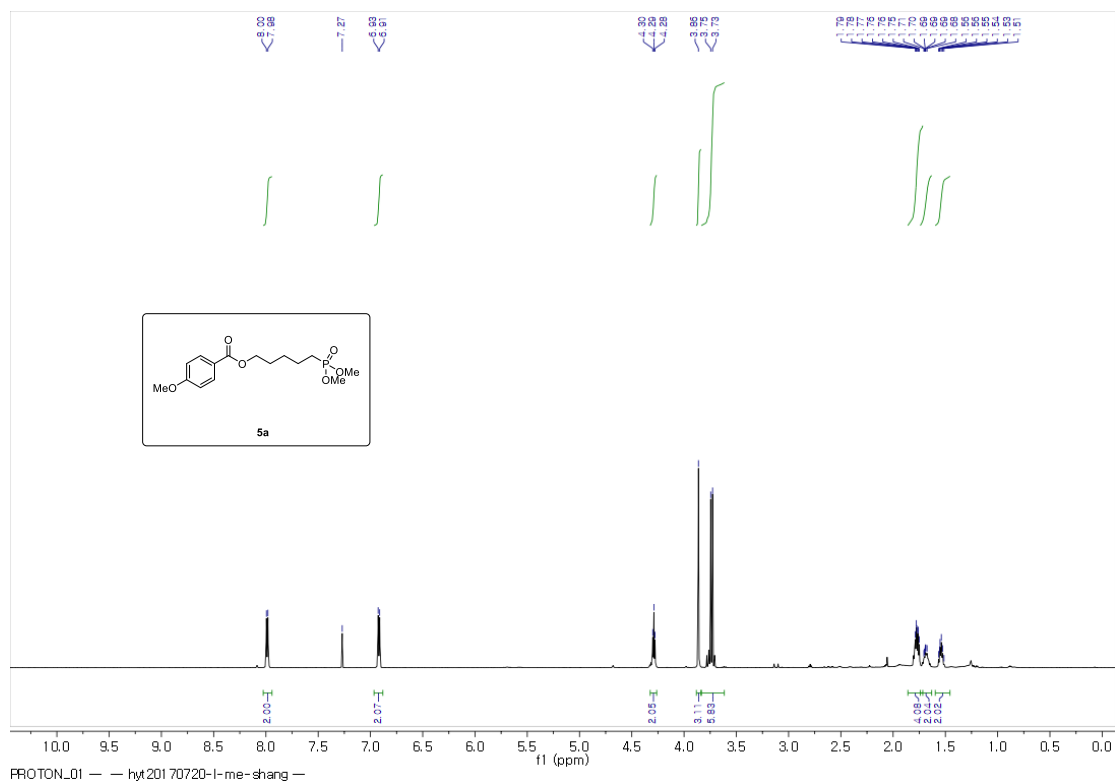

### 600 MHz, <sup>1</sup>H NMR in CDCl<sub>3</sub>

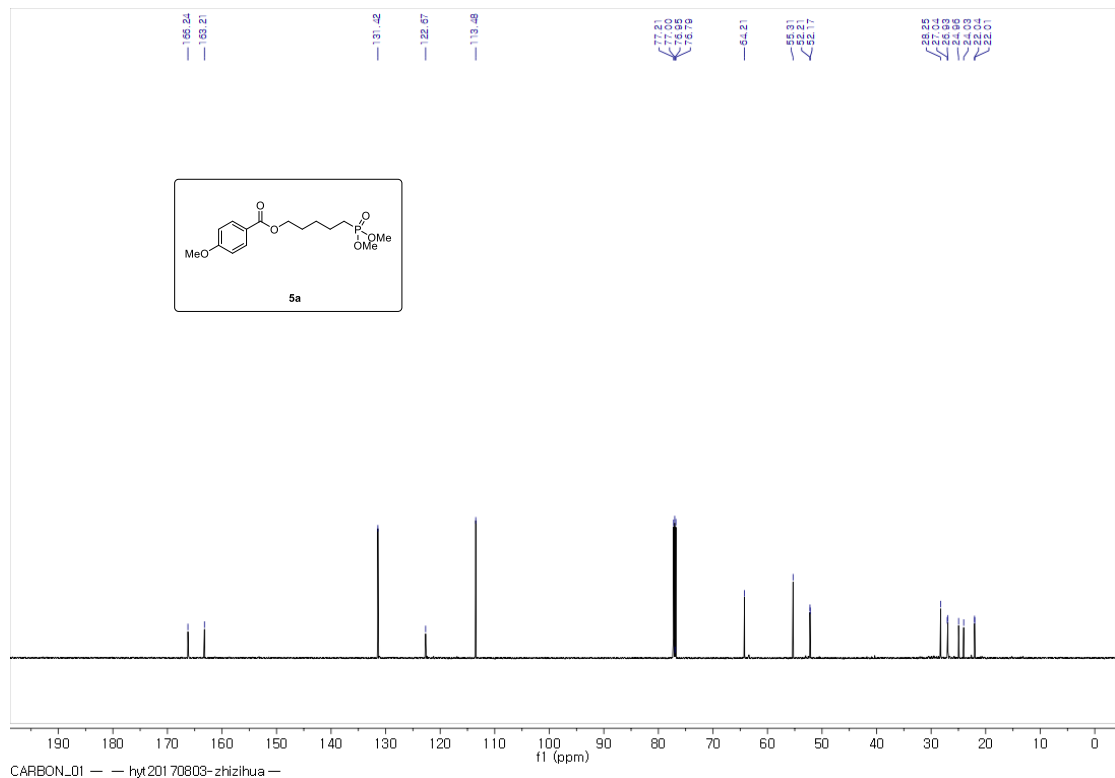

### 150 MHz, <sup>13</sup>C NMR in CDCl<sub>3</sub>



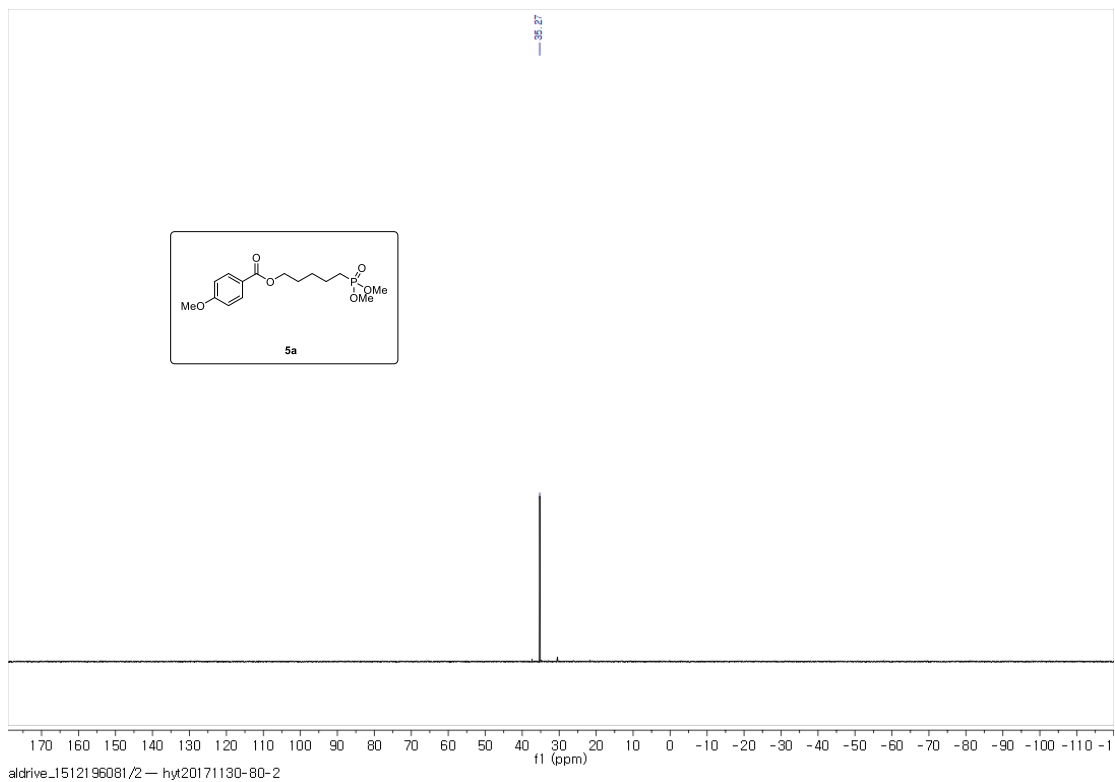

**methyl 2-(5-(benzoyloxy)-1-(dimethoxyphosphoryl)pentan-2-yl)isonicotinate (6a)**

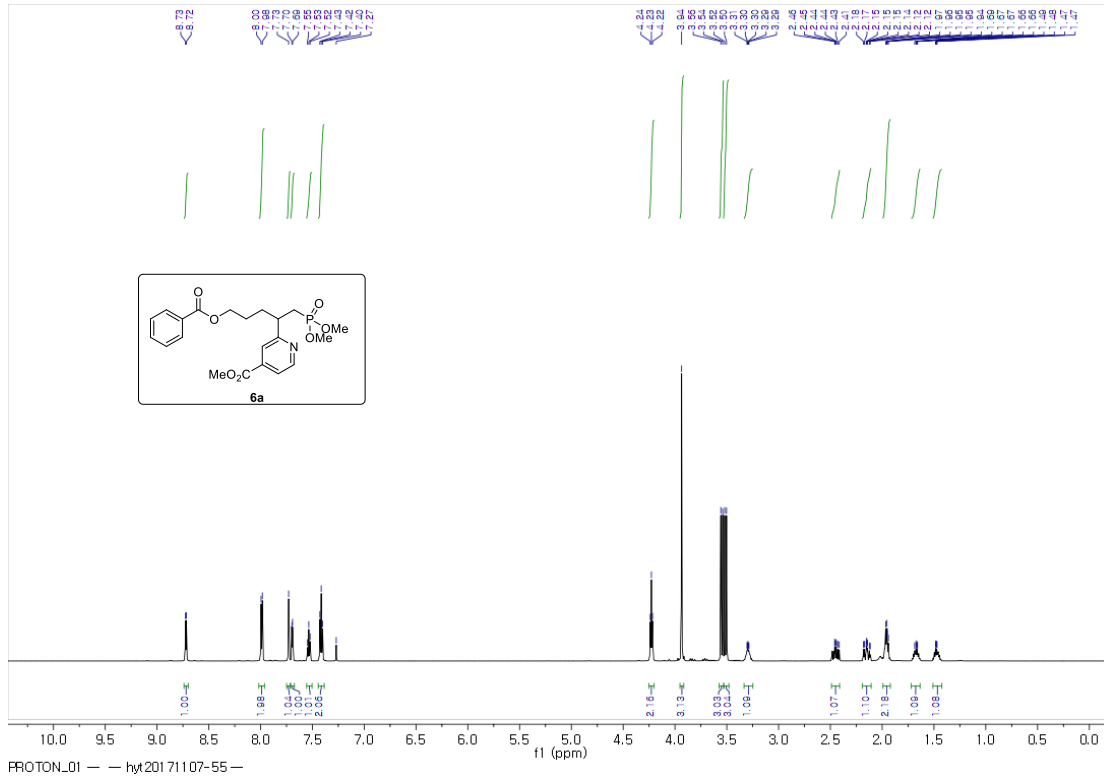

**600 MHz, <sup>1</sup>H NMR in CDCl<sub>3</sub>**

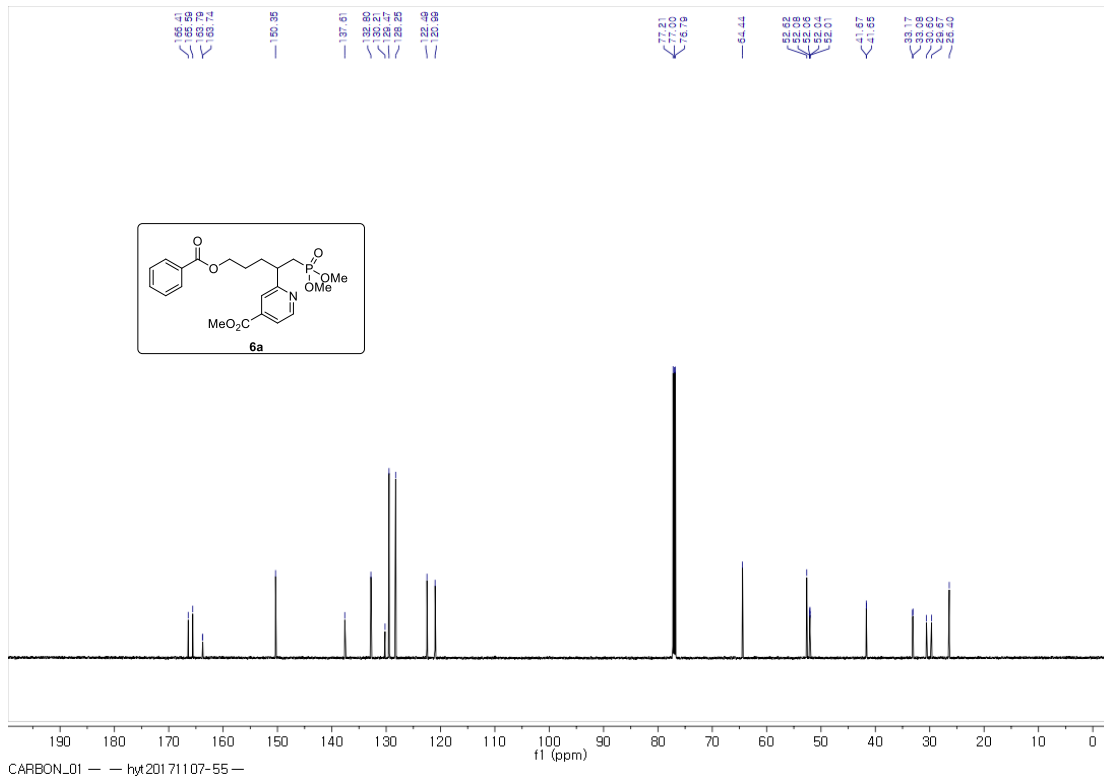

**150 MHz, <sup>13</sup>C NMR in CDCl<sub>3</sub>**

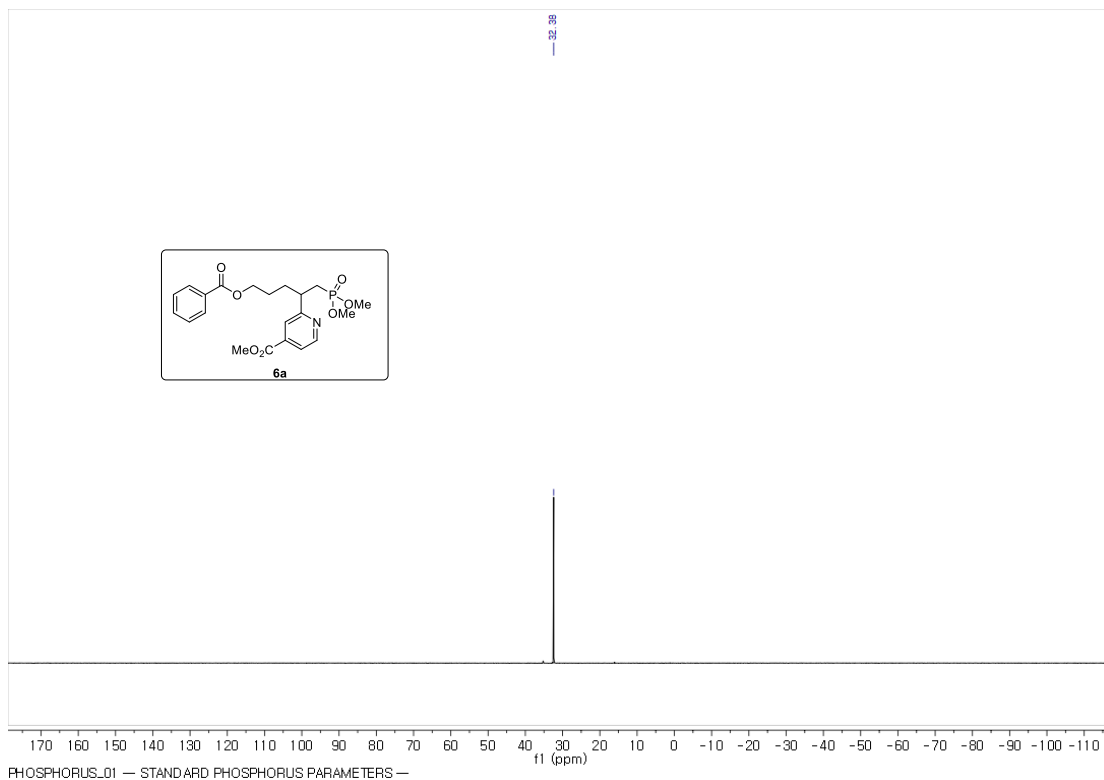

**243 MHz, <sup>31</sup>P NMR in CDCl<sub>3</sub>**



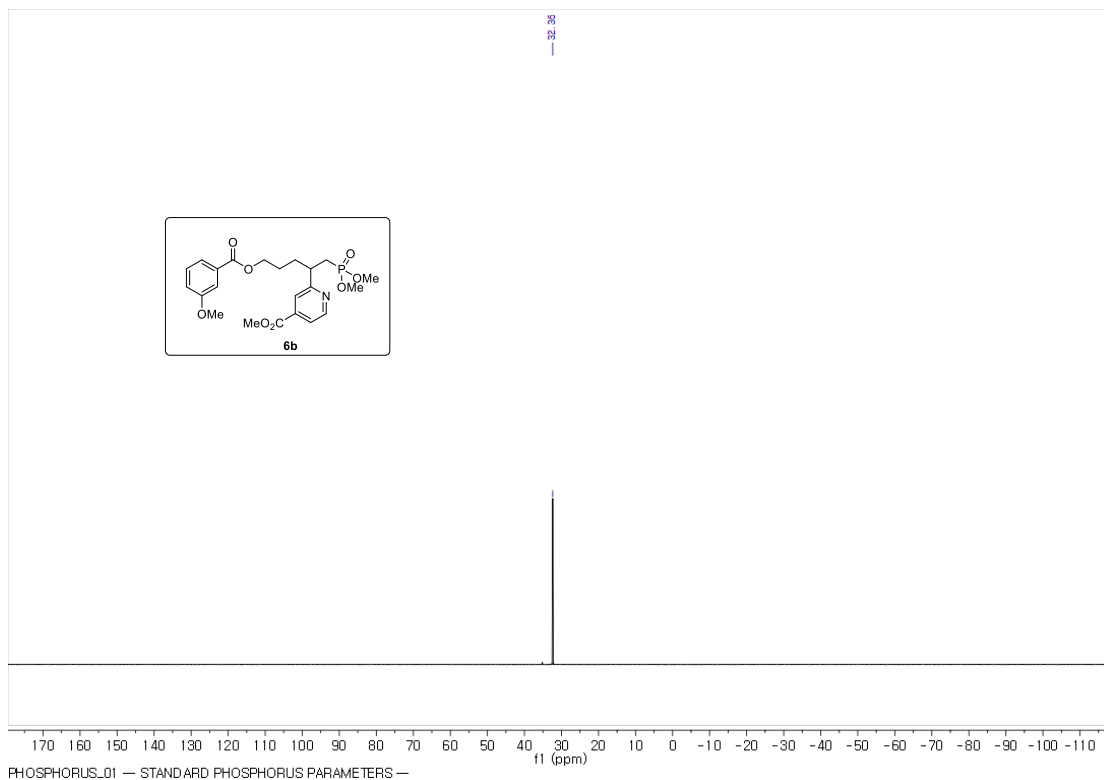

243 MHz,  $^{31}\text{P}$  NMR in  $\text{CDCl}_3$

**methyl 2-(1-(dimethoxyphosphoryl)-5-((3-fluorobenzoyl)oxy)pentan-2-yl)isonicotinate (6c)**

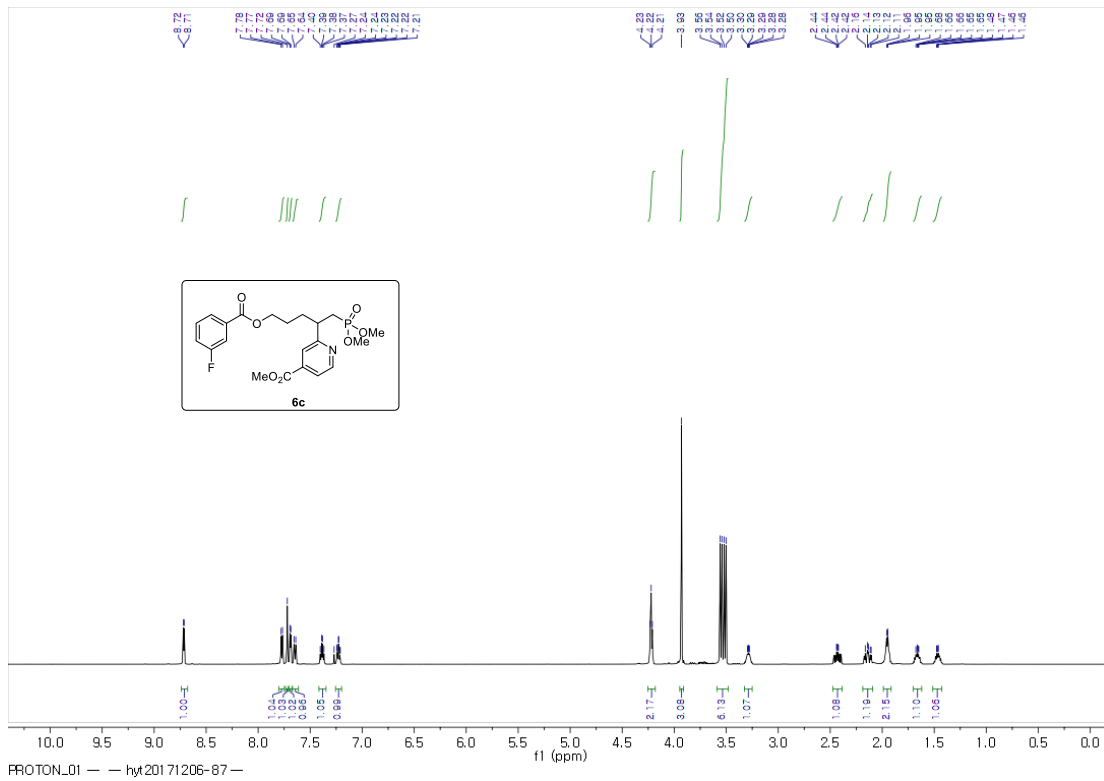

**600 MHz, <sup>1</sup>H NMR in CDCl<sub>3</sub>**

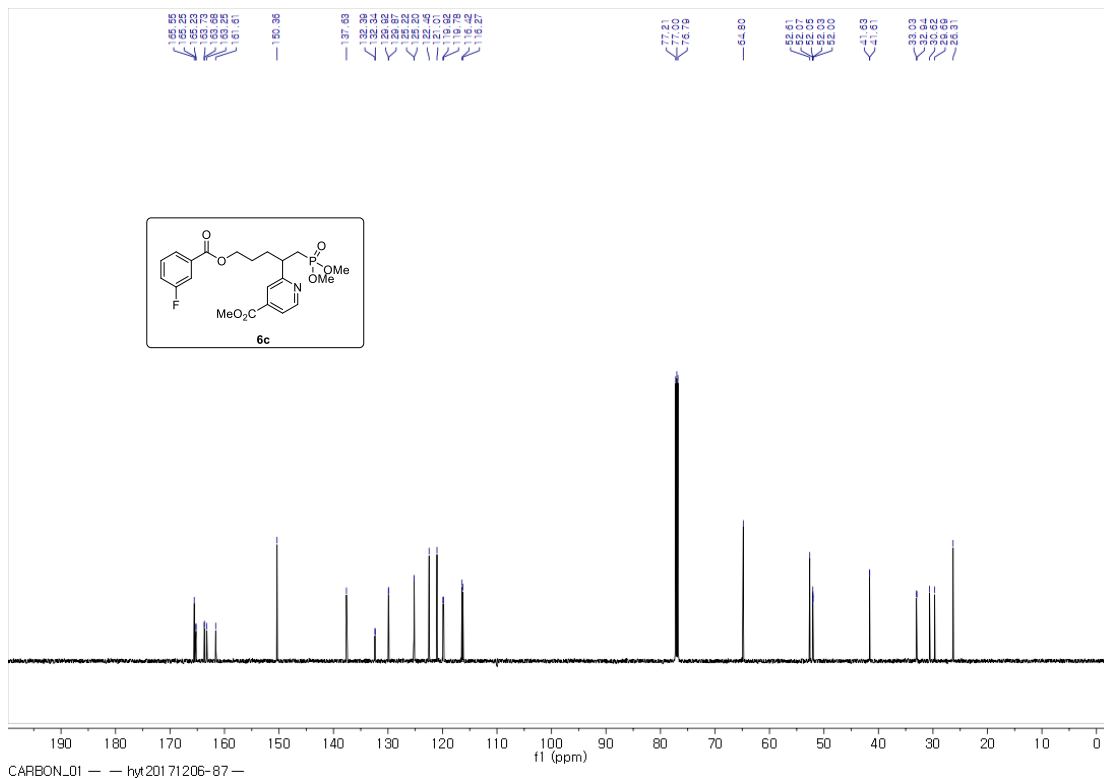

**150 MHz, <sup>13</sup>C NMR in CDCl<sub>3</sub>**

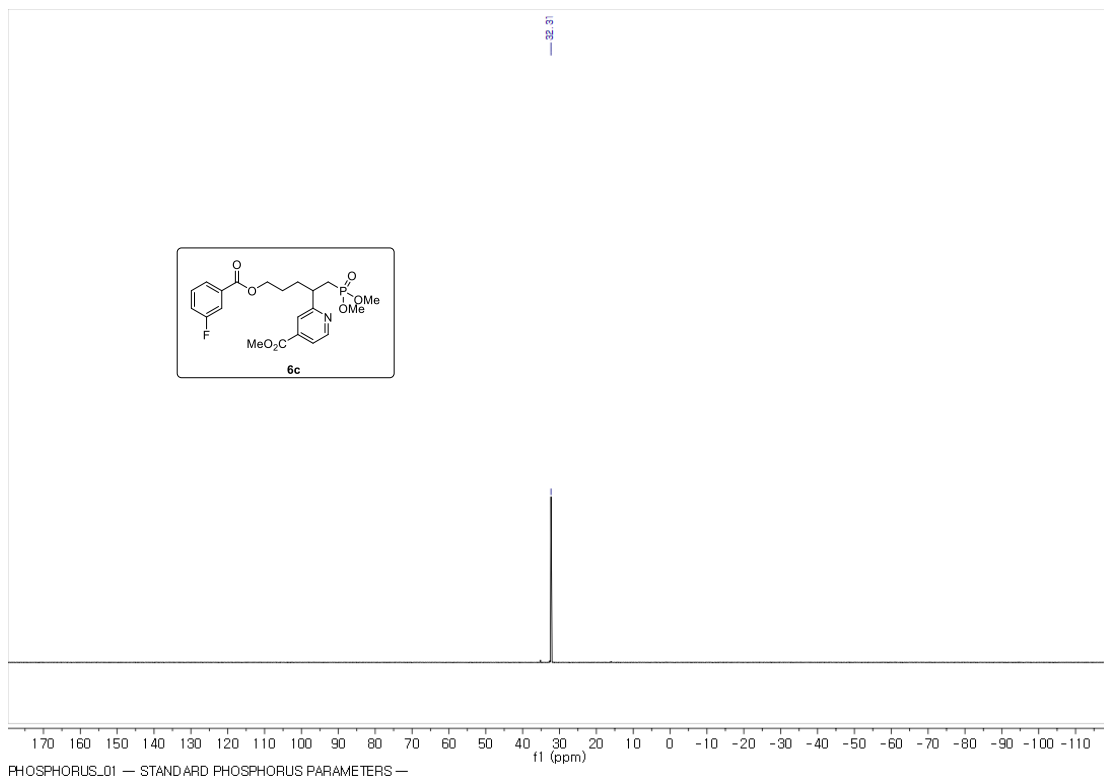

243 MHz, <sup>31</sup>P NMR in CDCl<sub>3</sub>

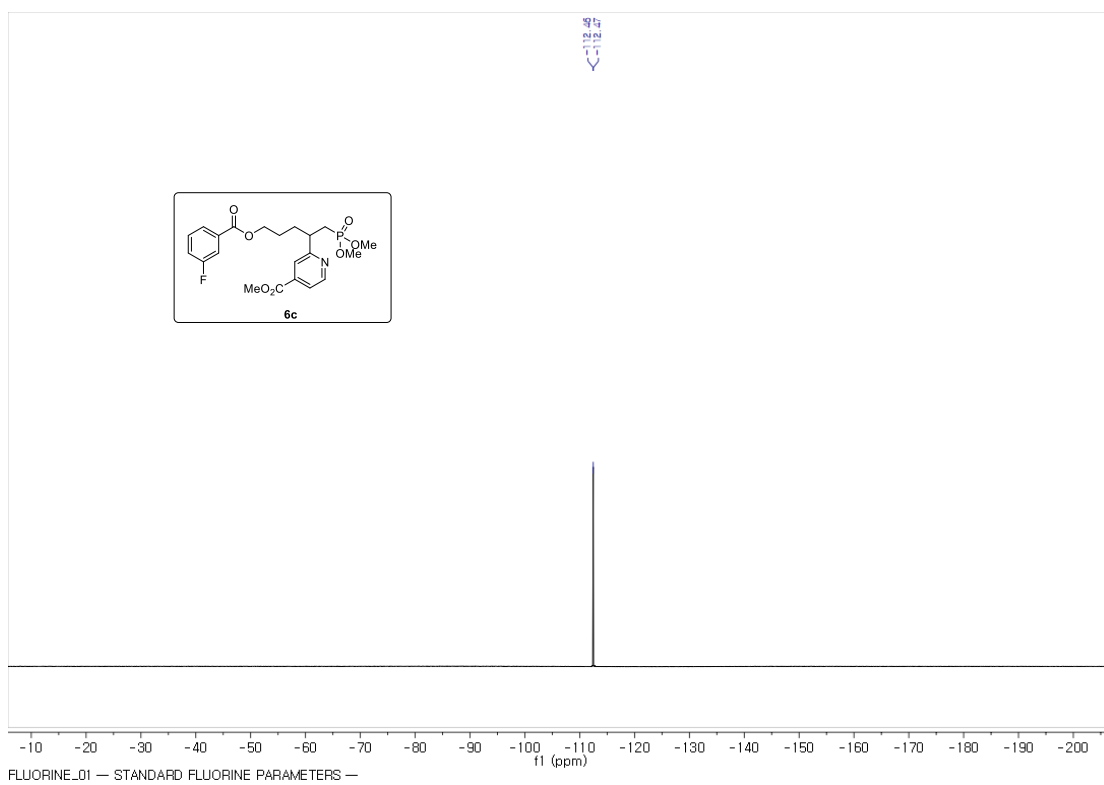

564 MHz, <sup>19</sup>F NMR in CDCl<sub>3</sub>





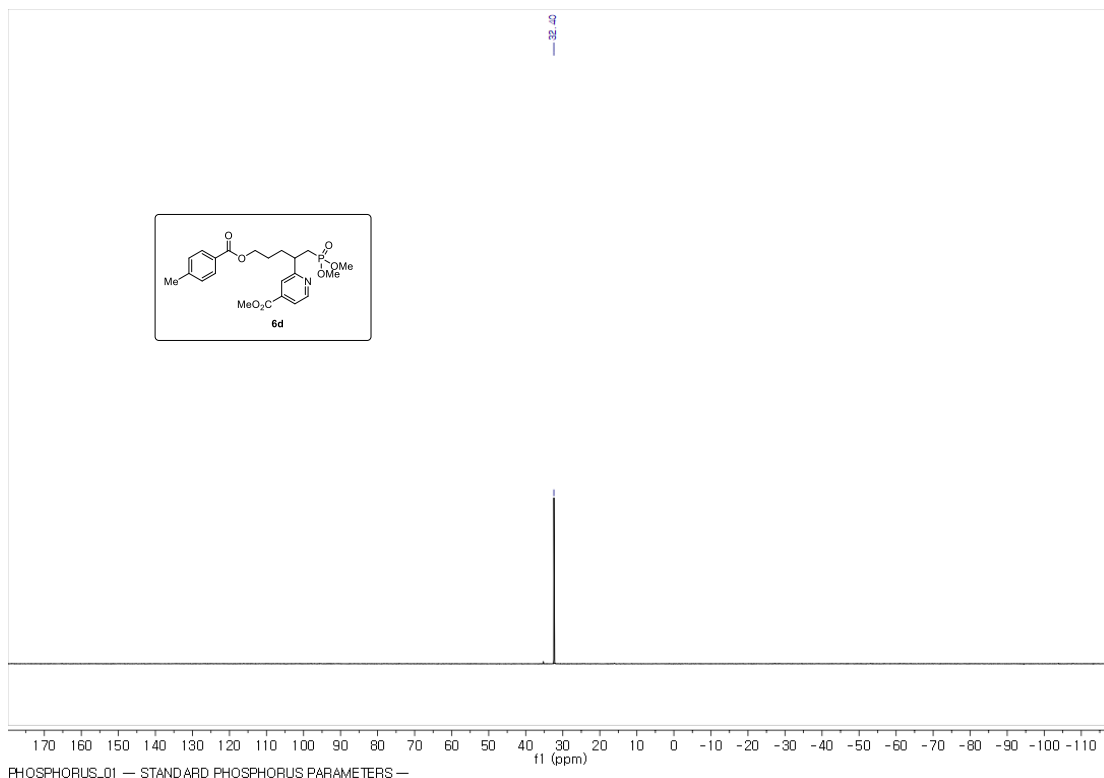

243 MHz, <sup>31</sup>P NMR in CDCl<sub>3</sub>

**methyl 2-(5-((4-chlorobenzoyl)oxy)-1-(dimethoxyphosphoryl)pentan-2-yl)isonicotinate (6e)**

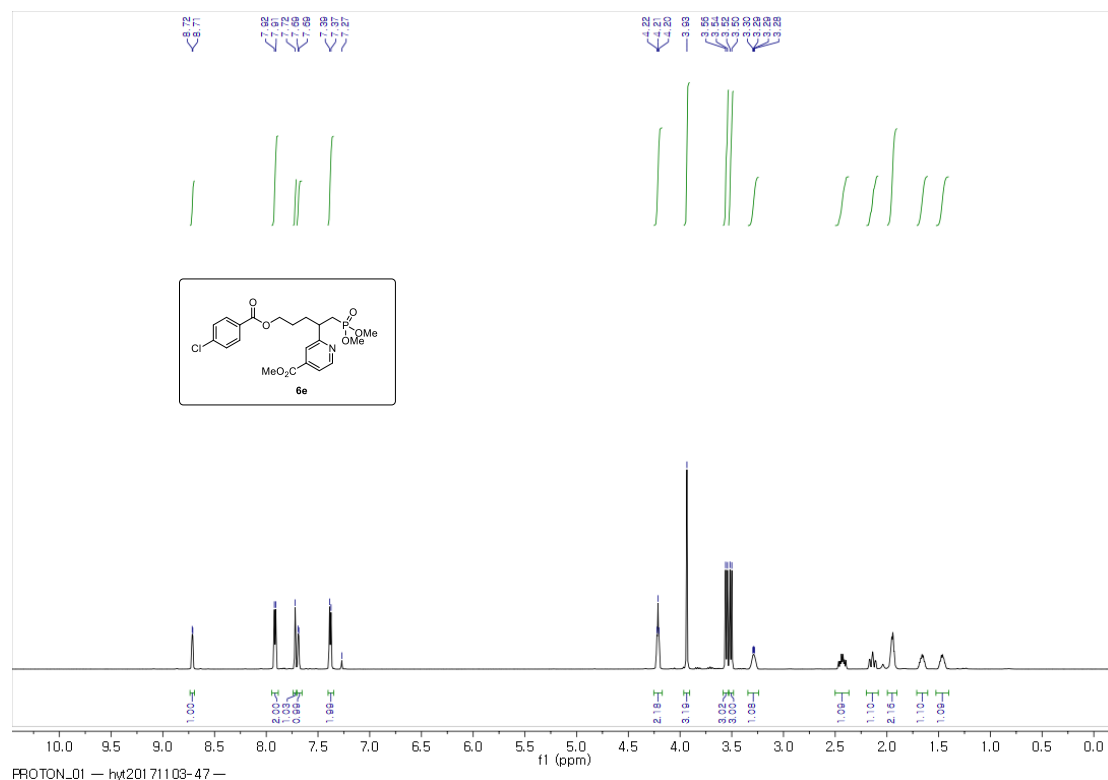

**600 MHz, <sup>1</sup>H NMR in CDCl<sub>3</sub>**

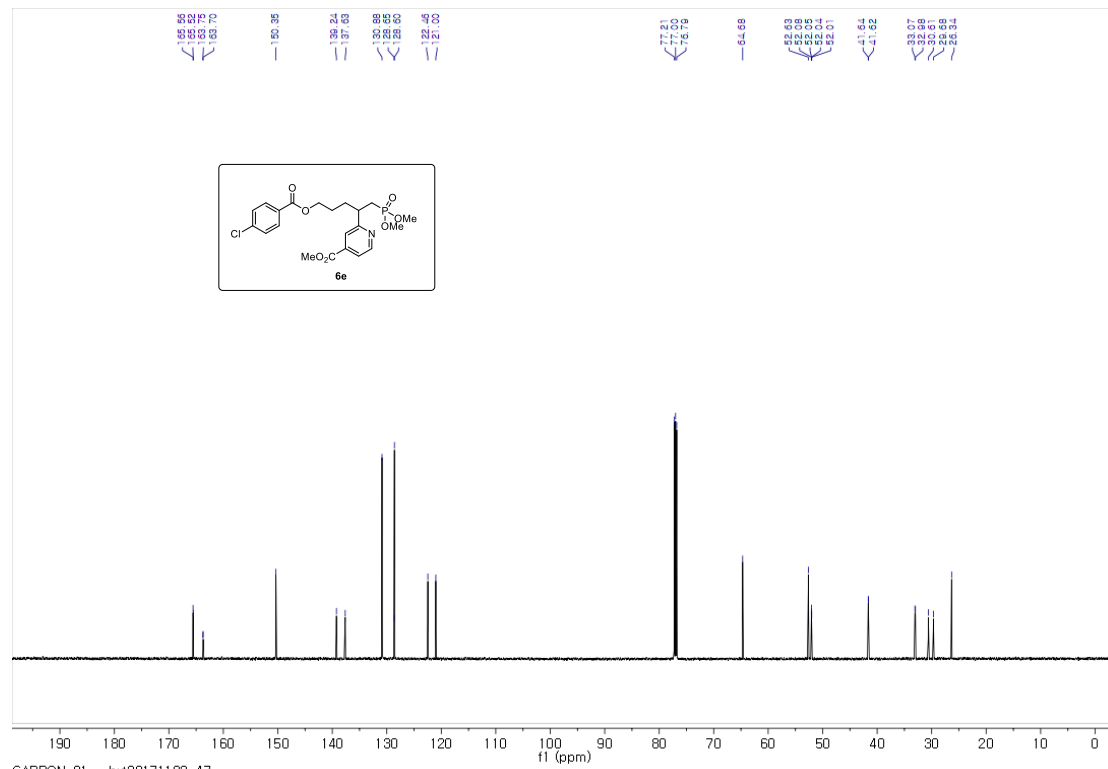

**150 MHz, <sup>13</sup>C NMR in CDCl<sub>3</sub>**

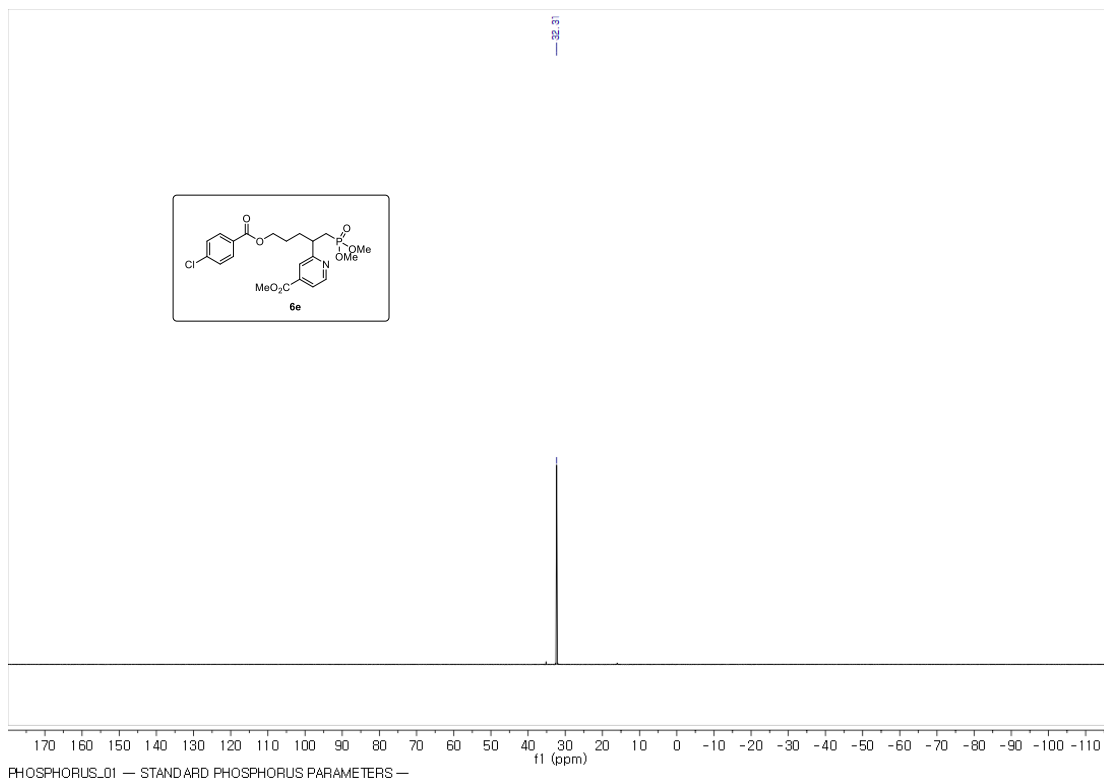

243 MHz,  $^{31}\text{P}$  NMR in  $\text{CDCl}_3$

**methyl 2-(1-(dimethoxyphosphoryl)-5-((3-phenylpropanoyl)oxy)pentan-2-yl)isonicotinate (6f)**

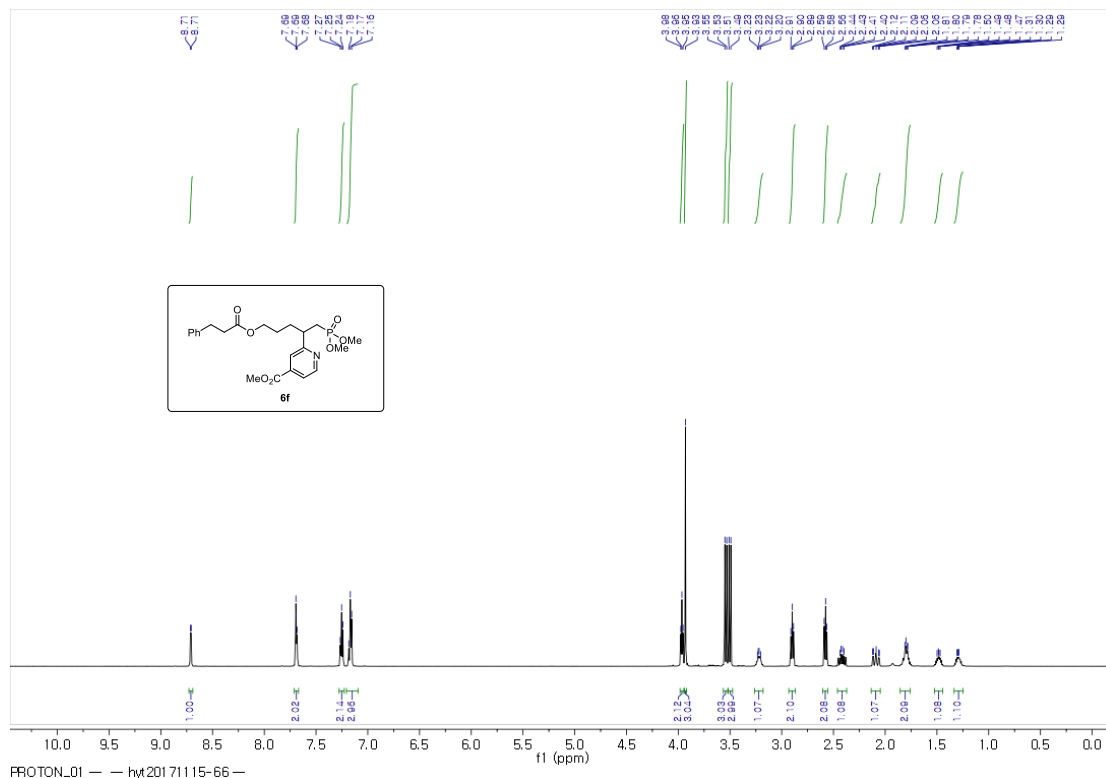

**600 MHz, <sup>1</sup>H NMR in CDCl<sub>3</sub>**

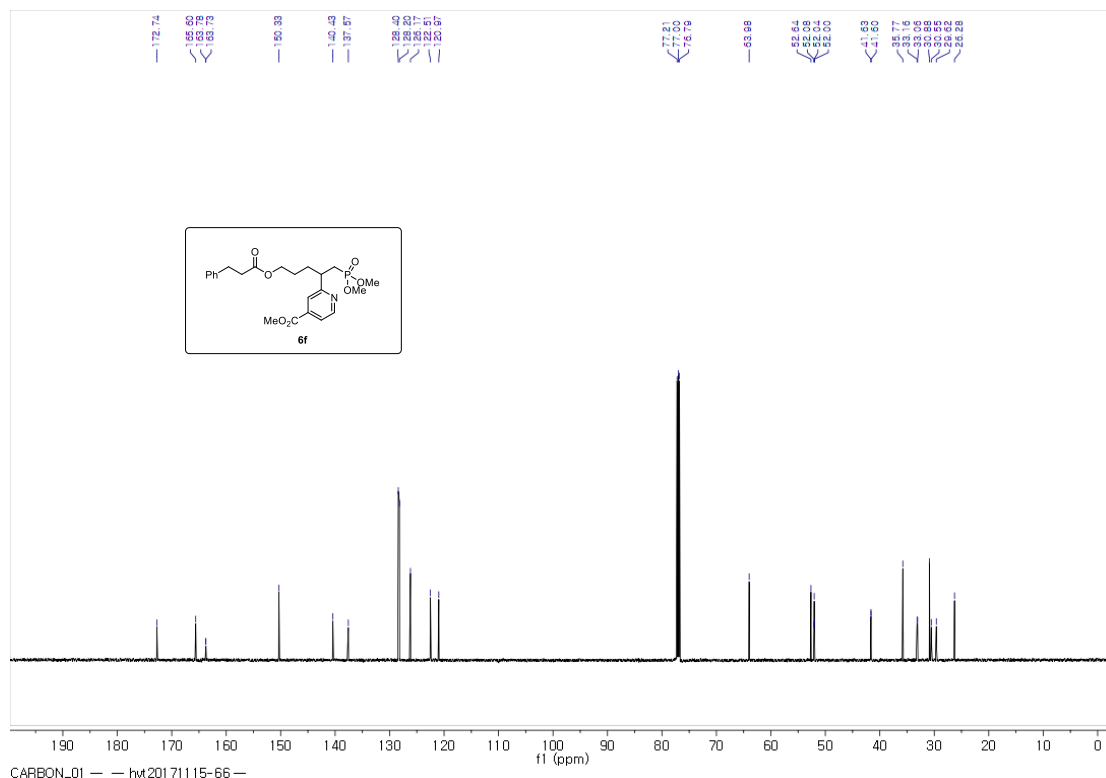

**150 MHz, <sup>13</sup>C NMR in CDCl<sub>3</sub>**

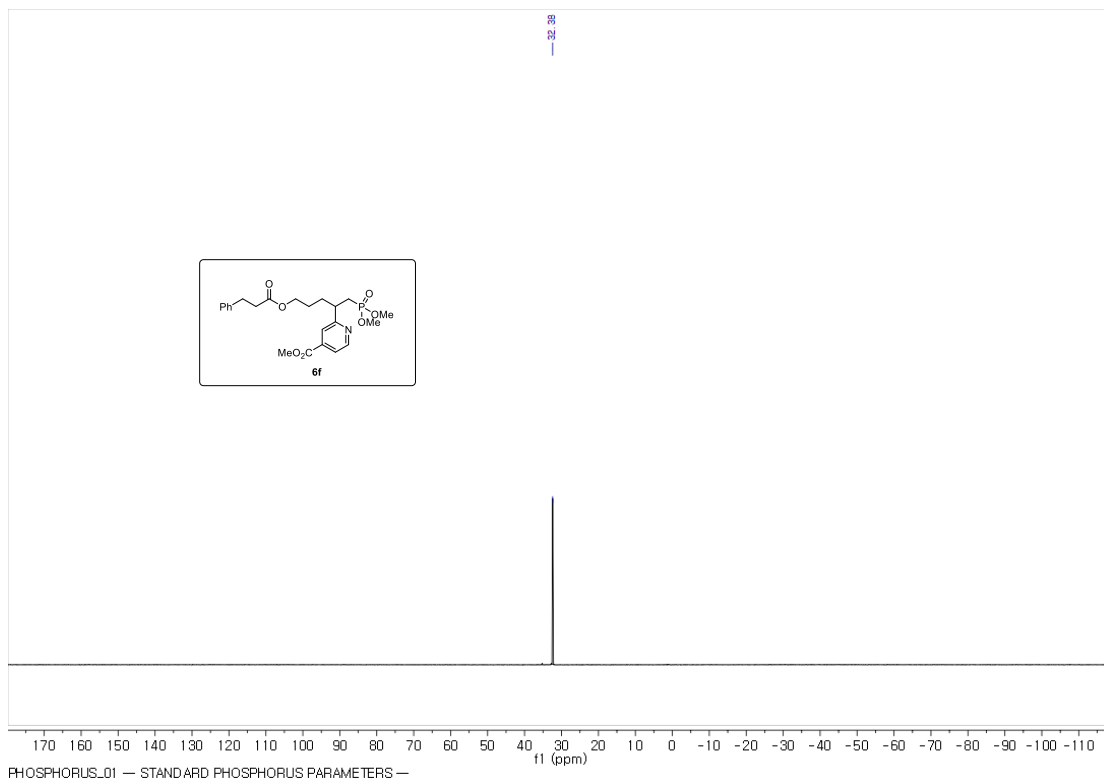

243 MHz,  $^{31}\text{P}$  NMR in  $\text{CDCl}_3$

**methyl 2-(1-(dimethoxyphosphoryl)-3-((4-methoxybenzoyl)oxy)propan-2-yl)isonicotinate (6g)**

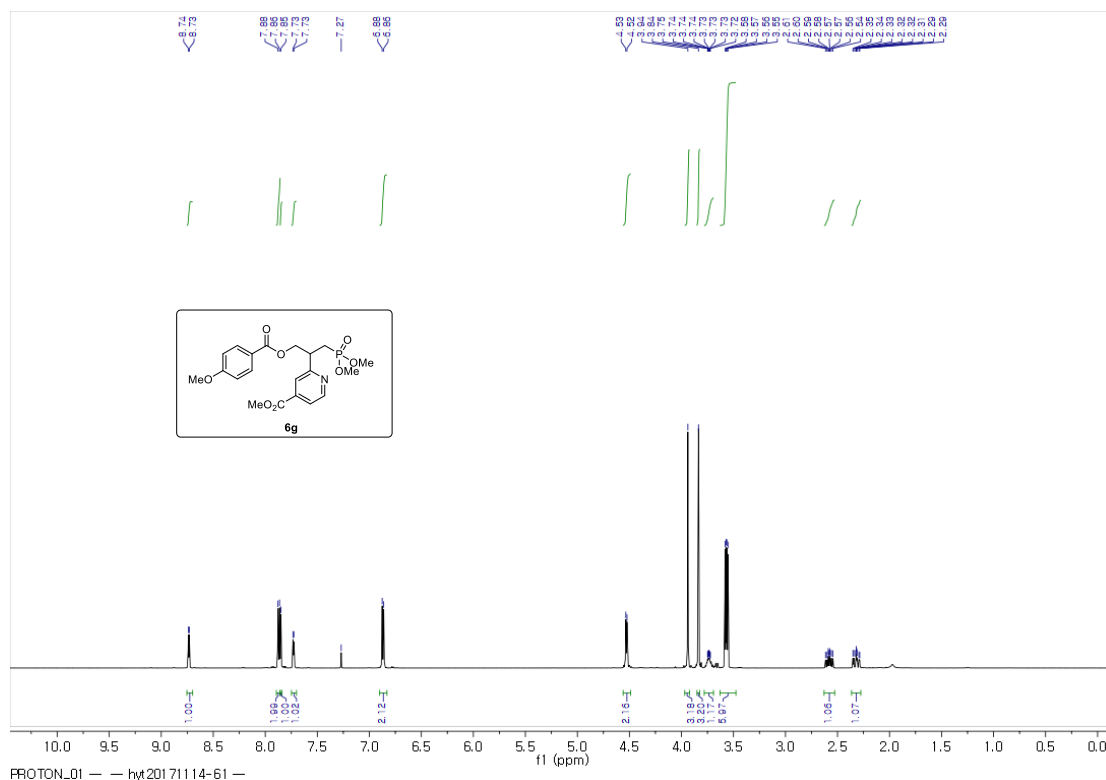

**600 MHz, <sup>1</sup>H NMR in CDCl<sub>3</sub>**

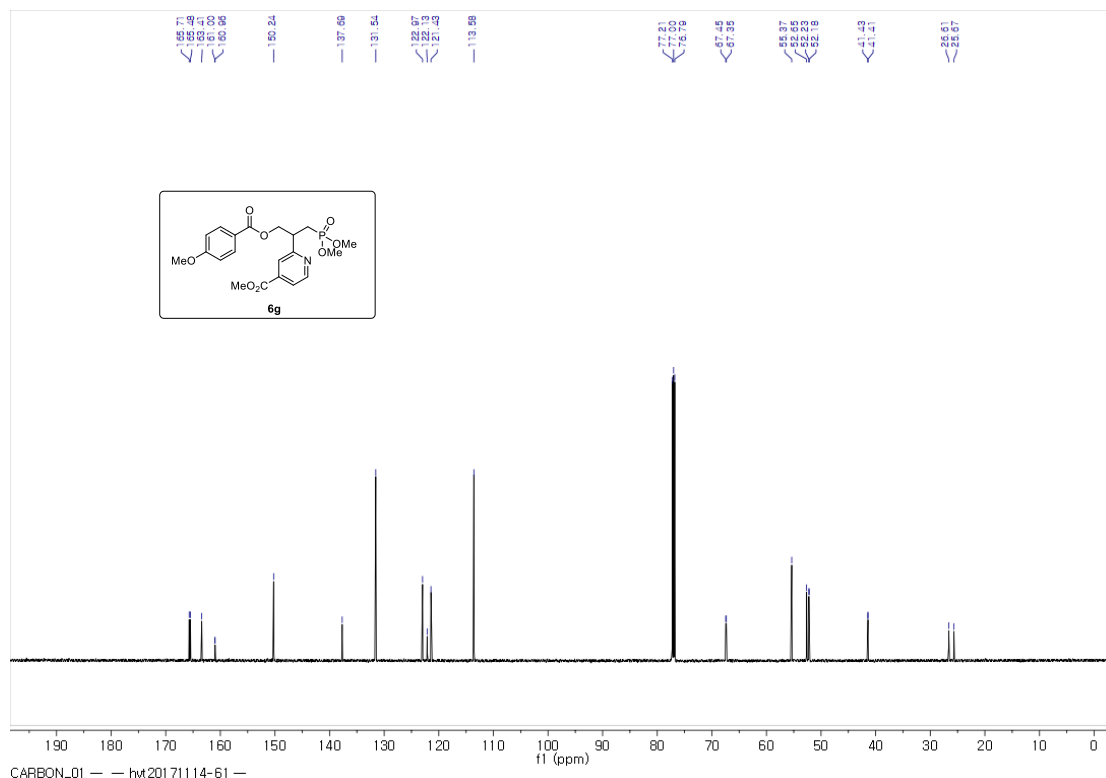

**150 MHz, <sup>13</sup>C NMR in CDCl<sub>3</sub>**

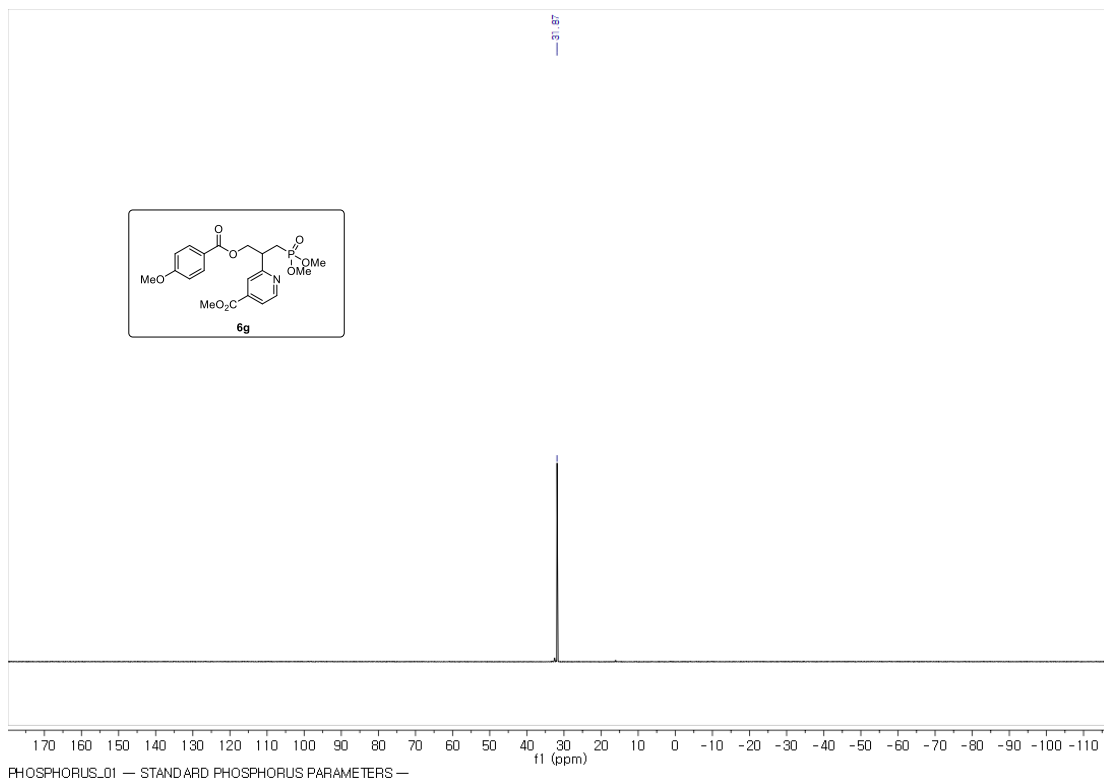

243 MHz, <sup>31</sup>P NMR in CDCl<sub>3</sub>

**methyl 2-(1-(dimethoxyphosphoryl)-4-phenoxybutan-2-yl)isonicotinate (6h)**

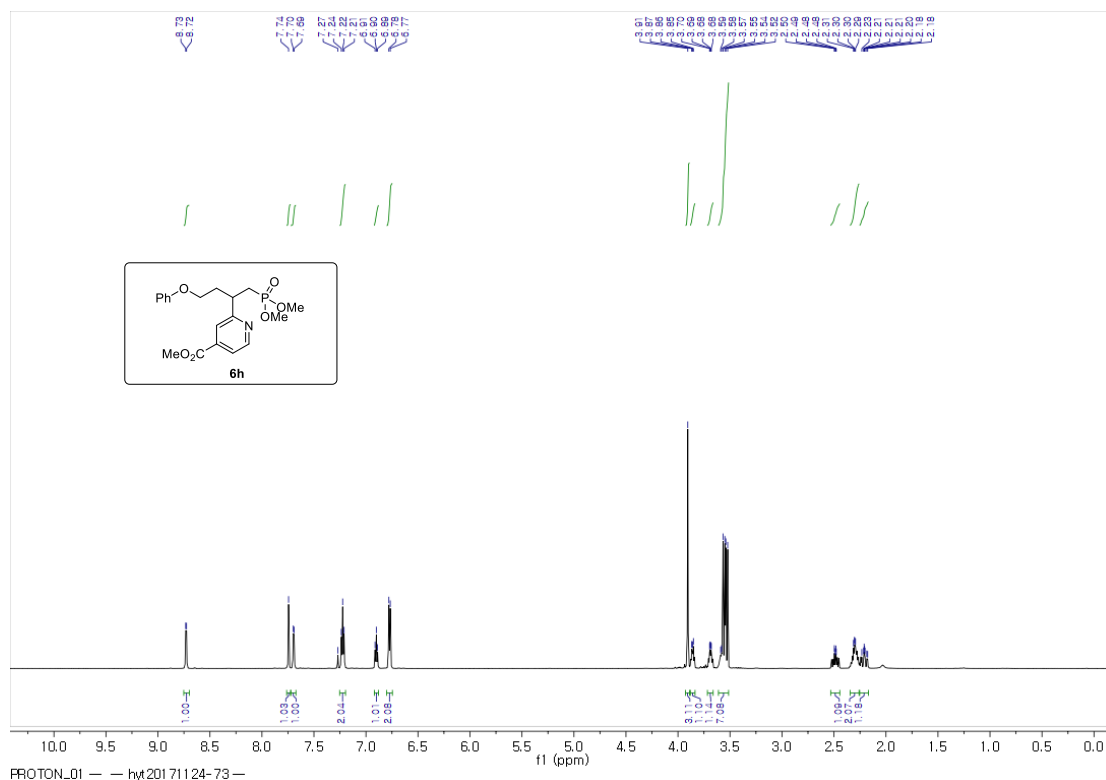

**600 MHz, <sup>1</sup>H NMR in CDCl<sub>3</sub>**

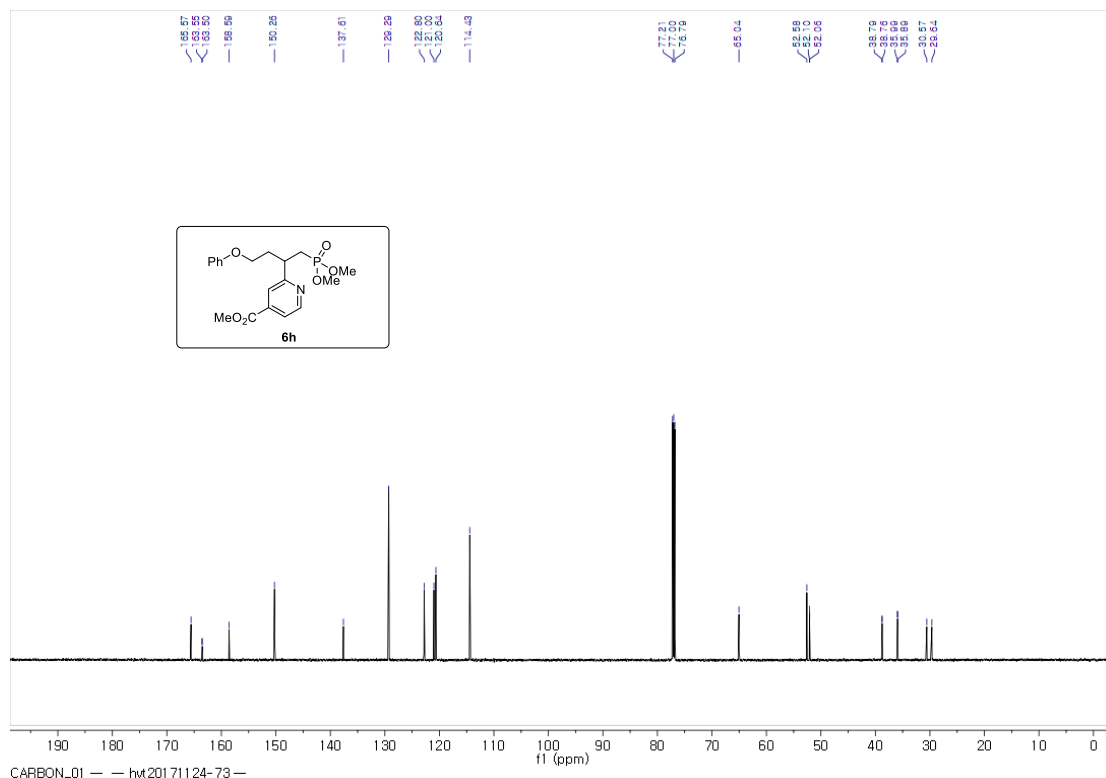

**150 MHz, <sup>13</sup>C NMR in CDCl<sub>3</sub>**



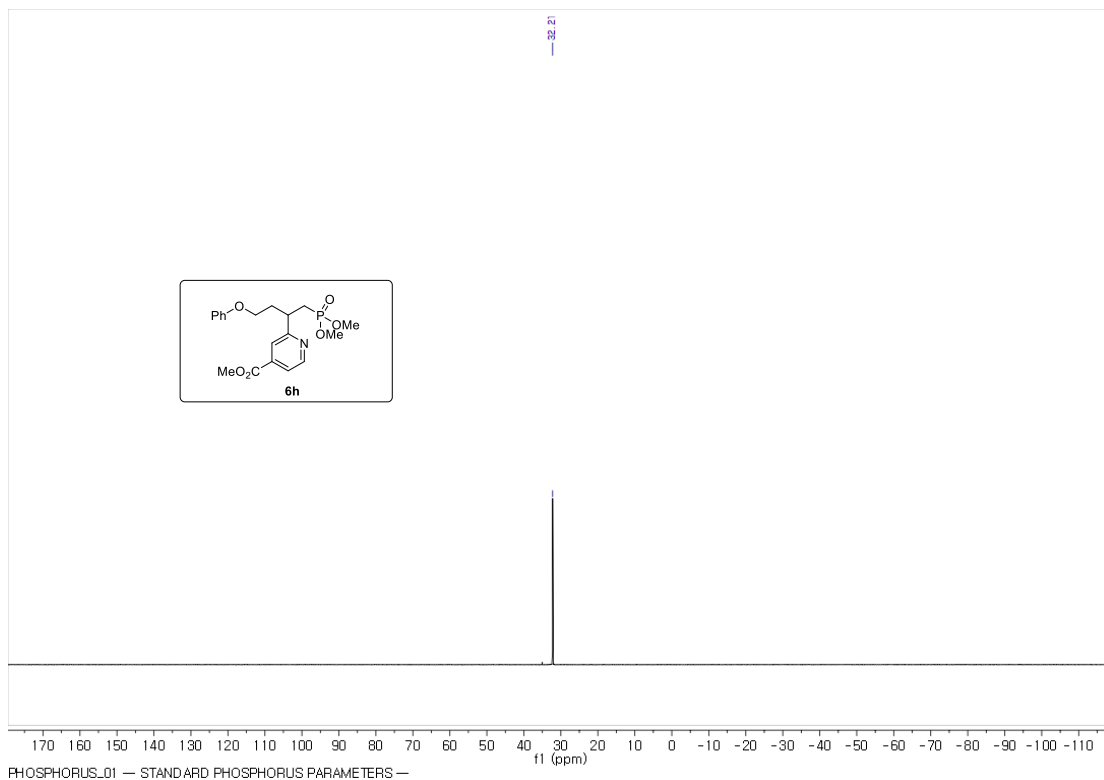

**243 MHz, <sup>31</sup>P NMR in CDCl<sub>3</sub>**

### methyl 2-(1-(dimethoxyphosphoryl)-3-phenoxypropan-2-yl)isonicotinate (6i)

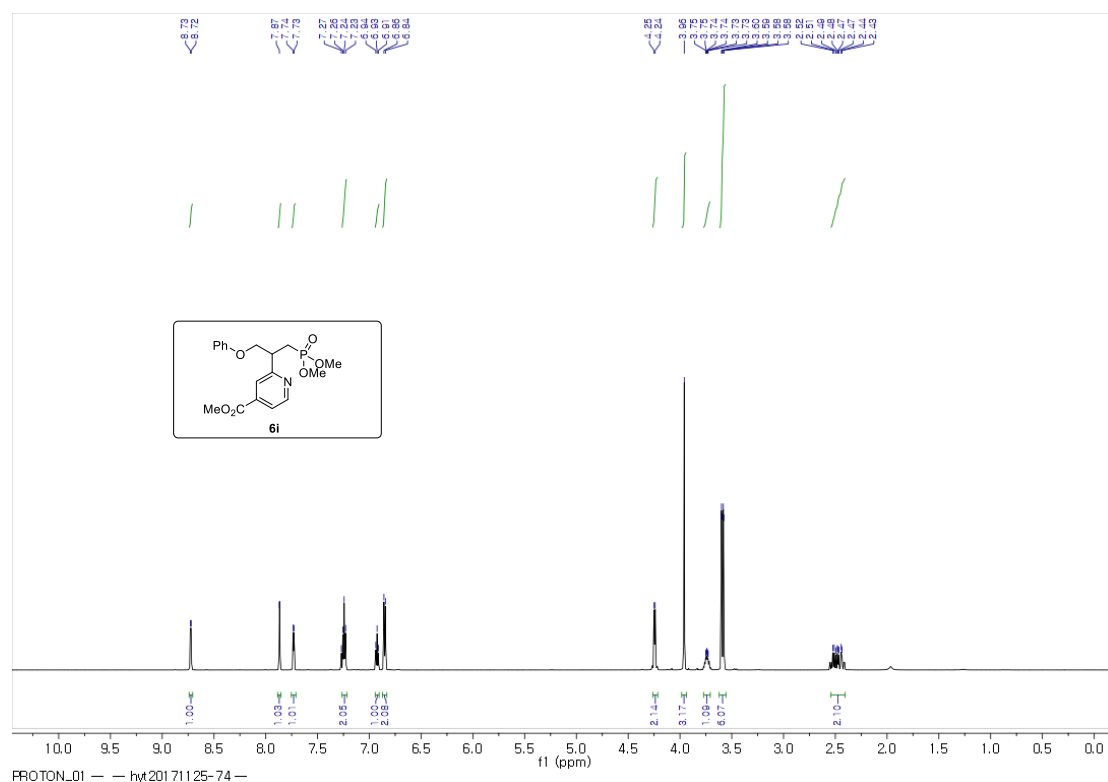

### 600 MHz, <sup>1</sup>H NMR in CDCl<sub>3</sub>

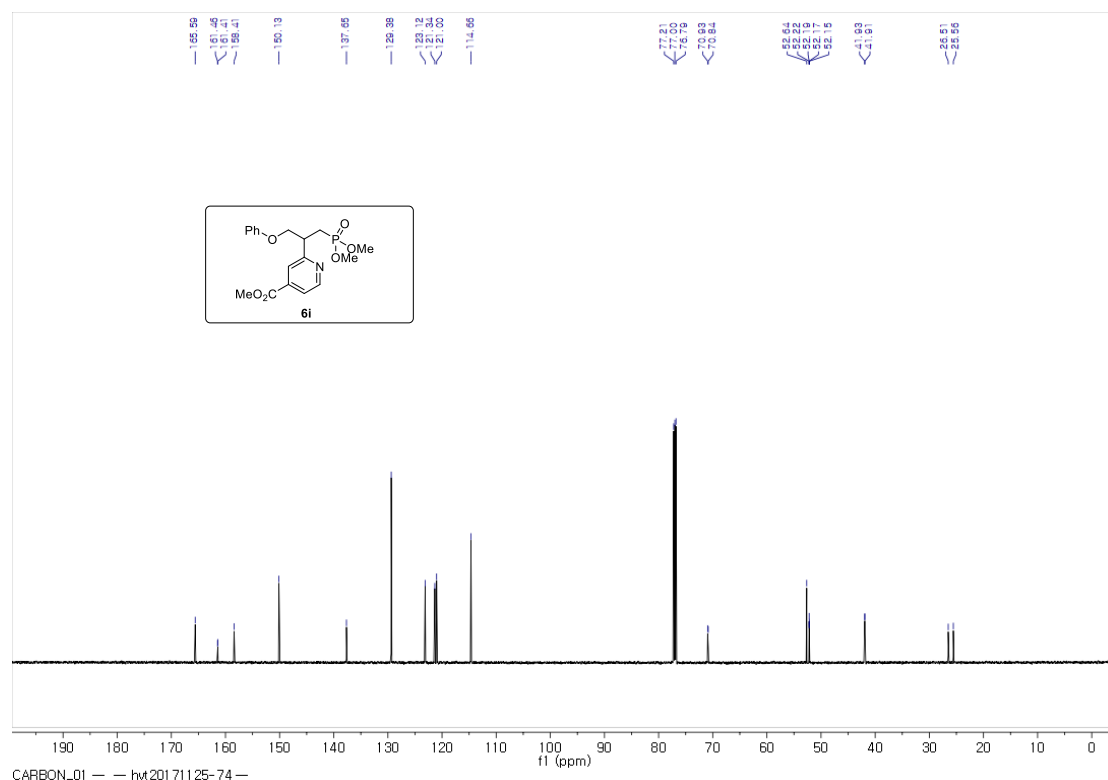

### 150 MHz, <sup>13</sup>C NMR in CDCl<sub>3</sub>

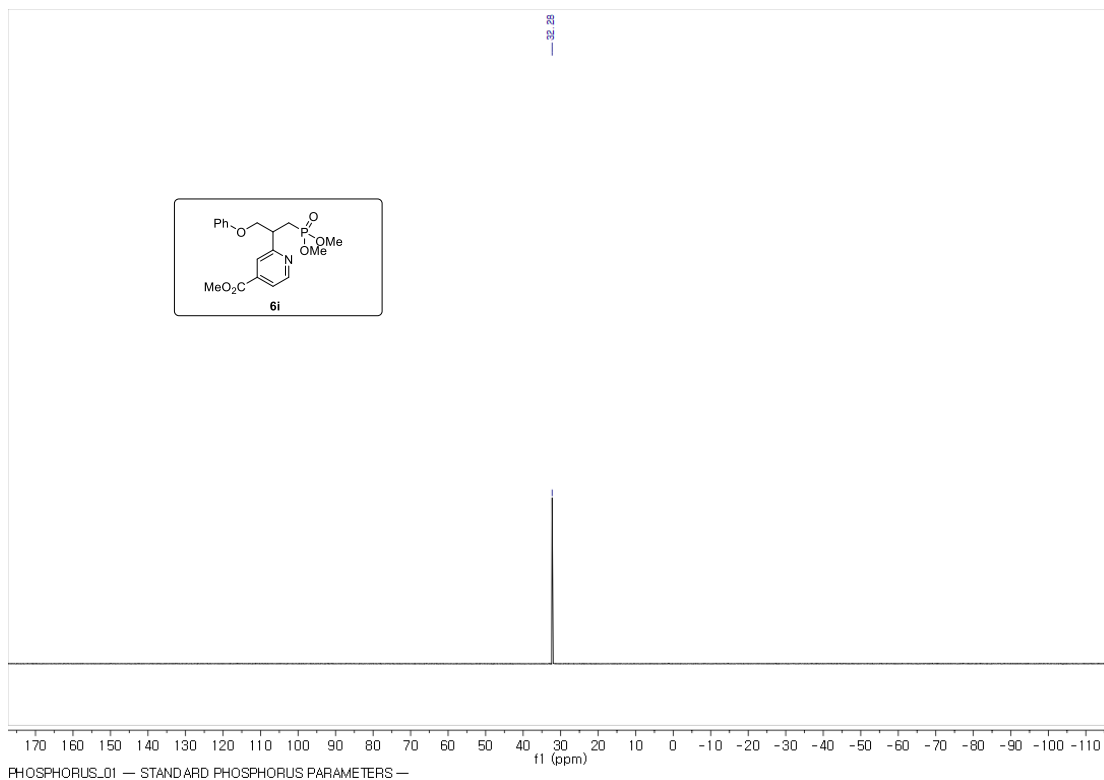

243 MHz,  $^{31}\text{P}$  NMR in  $\text{CDCl}_3$

**methyl 2-(1-(dimethoxyphosphoryl)-6-hydroxyhexan-2-yl)isonicotinate (6j)**

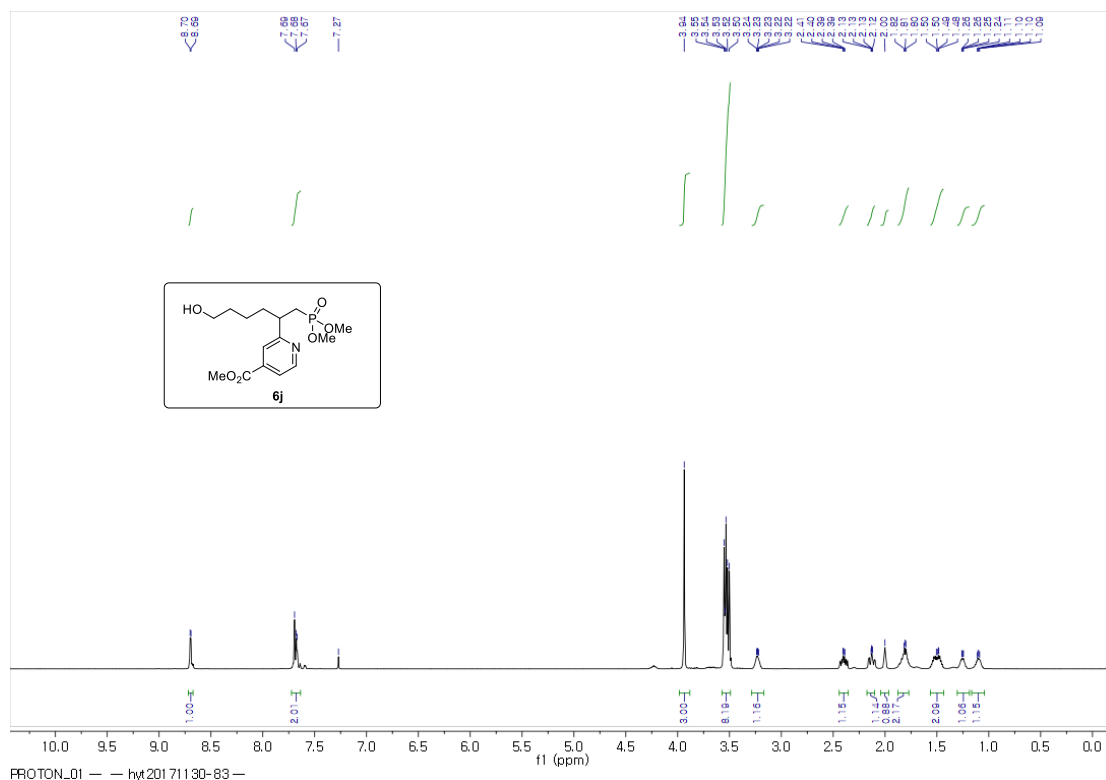

**600 MHz, <sup>1</sup>H NMR in CDCl<sub>3</sub>**

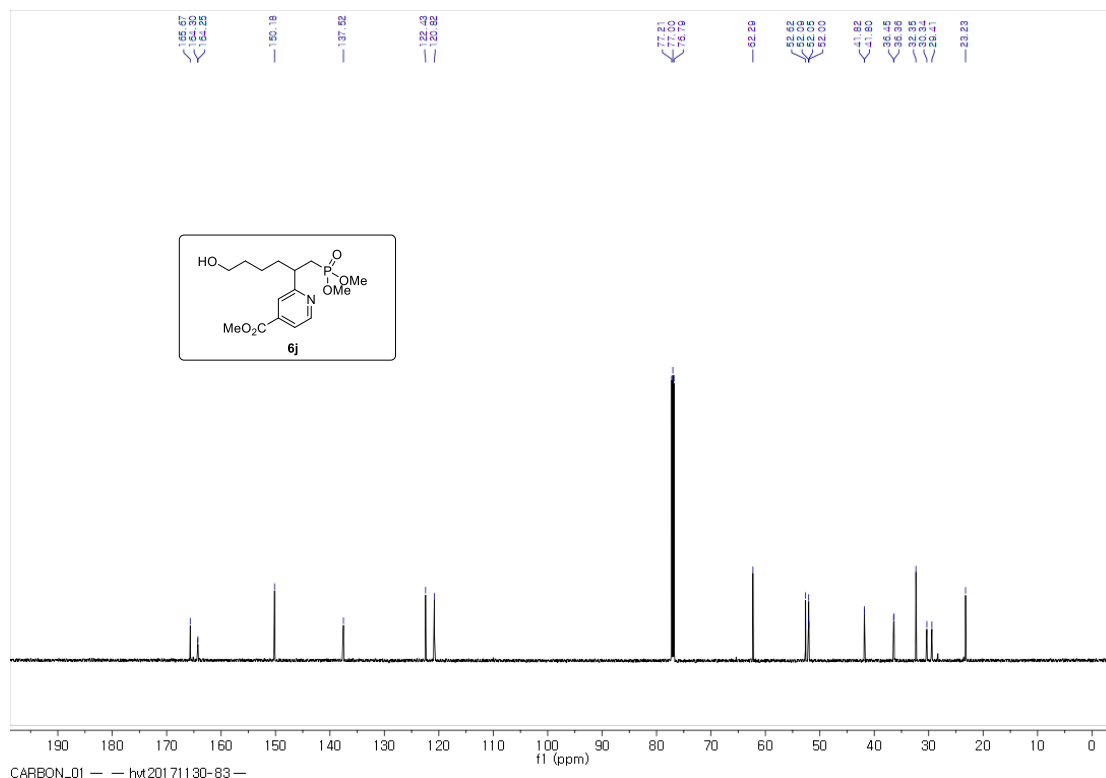

**150 MHz, <sup>13</sup>C NMR in CDCl<sub>3</sub>**

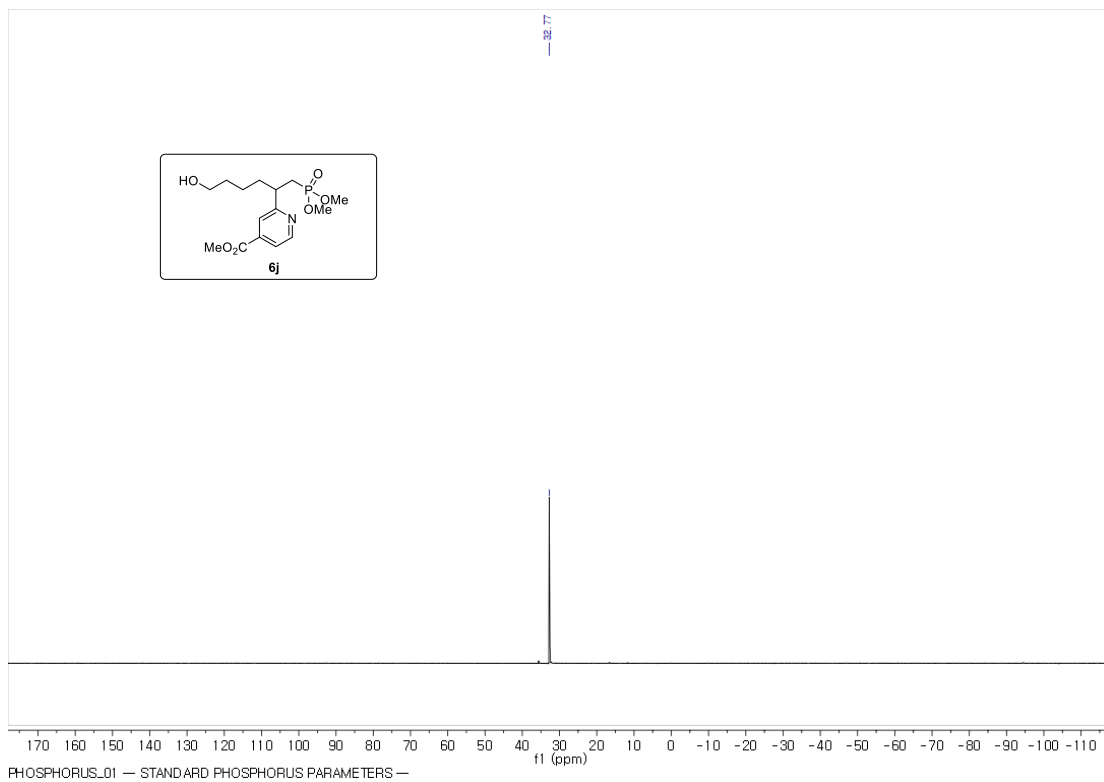

243 MHz, <sup>31</sup>P NMR in CDCl<sub>3</sub>

**methyl 2-(1-(dimethoxyphosphoryl)-5-(1,3-dioxoisindolin-2-yl)pentan-2-yl)isonicotinate (6k)**

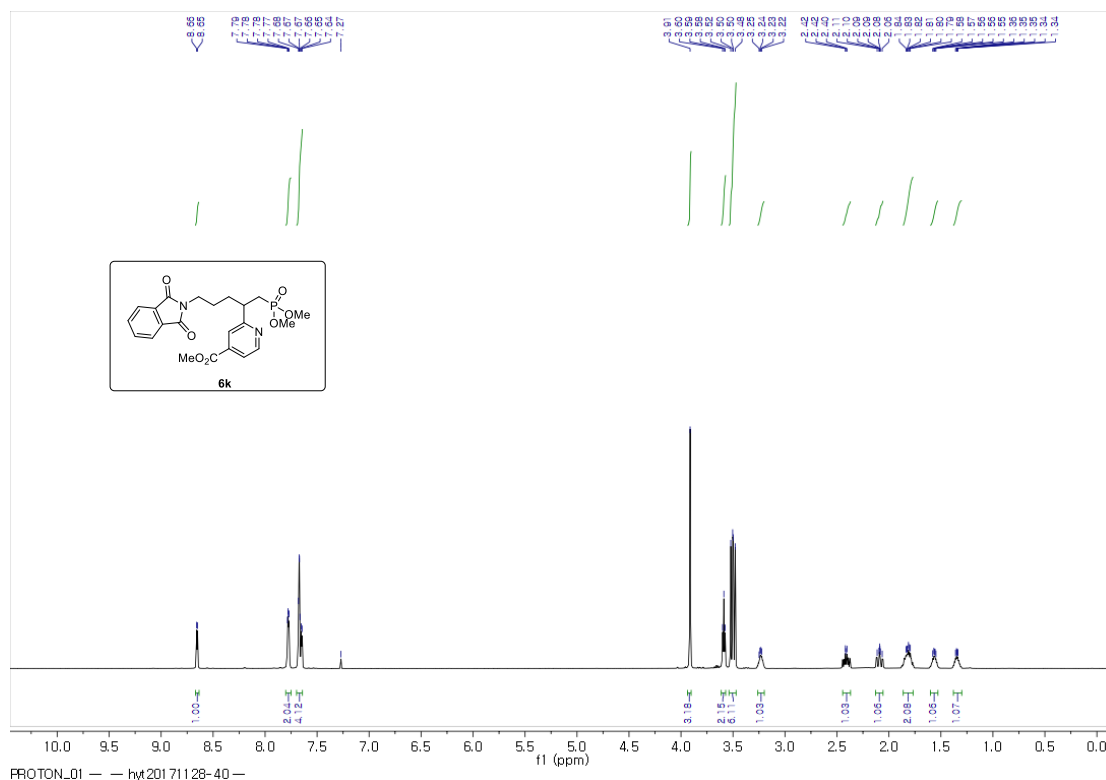

**600 MHz, <sup>1</sup>H NMR in CDCl<sub>3</sub>**

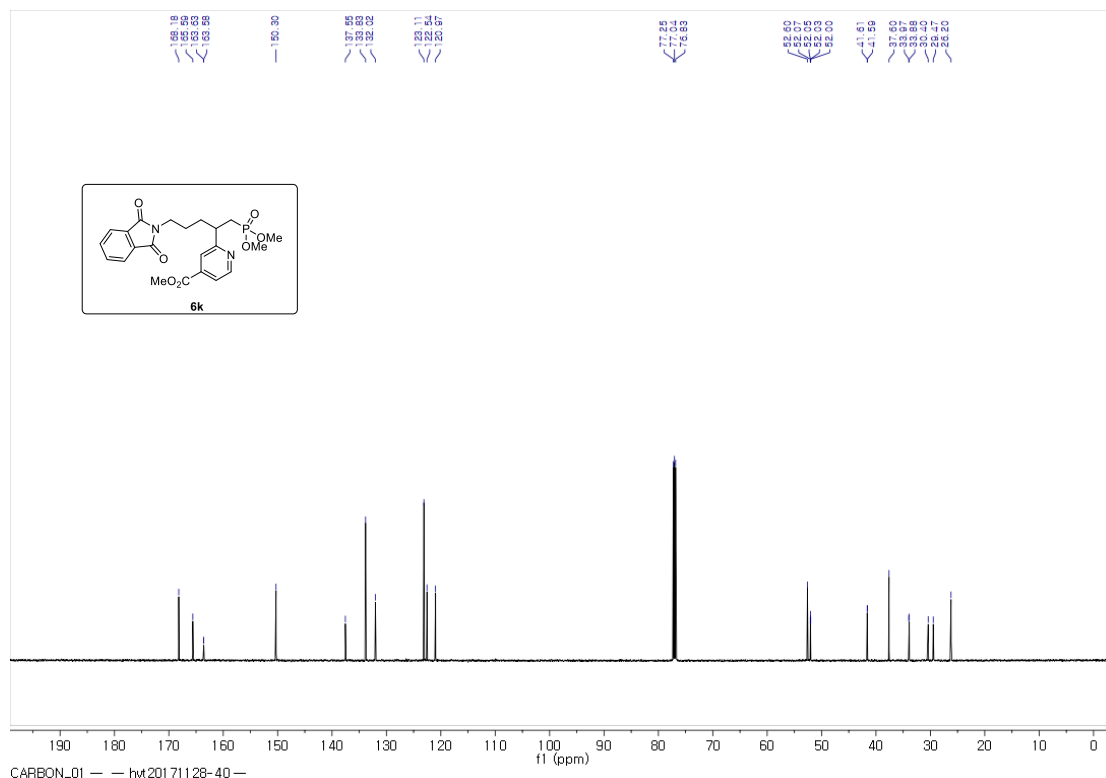

**150 MHz, <sup>13</sup>C NMR in CDCl<sub>3</sub>**

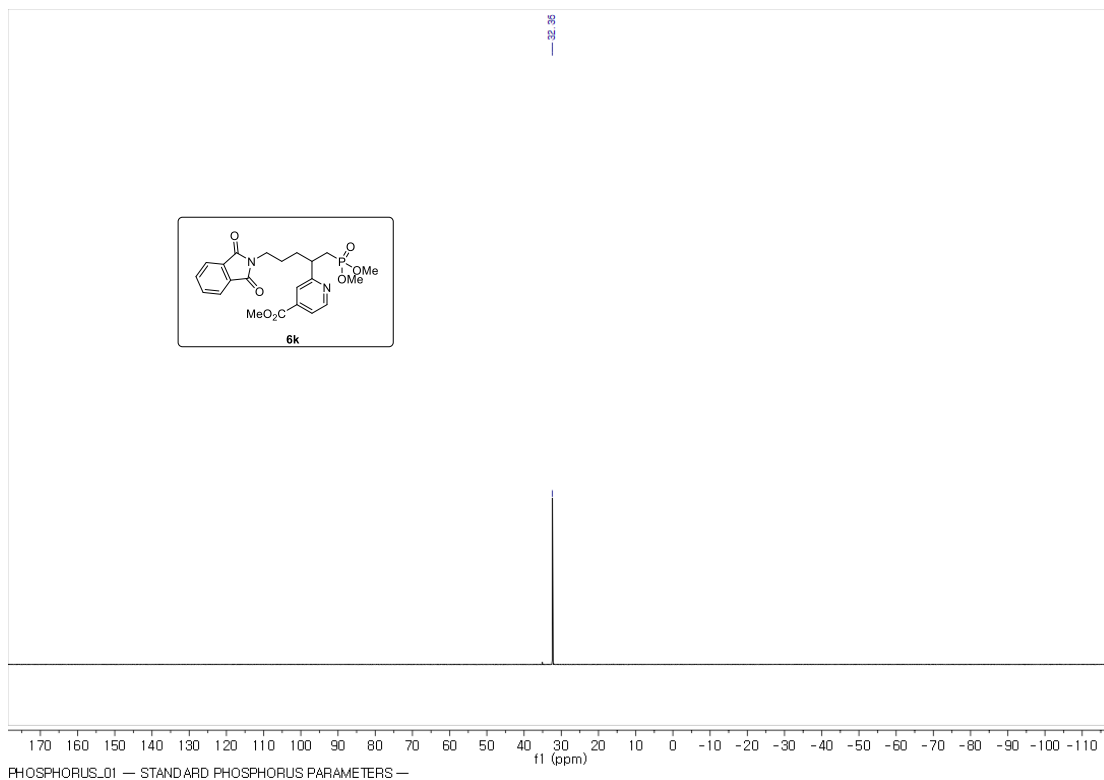

**243 MHz,  $^{31}\text{P}$  NMR in  $\text{CDCl}_3$**

**methyl 2-(1-(dimethoxyphosphoryl)-7-(methoxy(methyl)amino)-7-oxoheptan-2-yl)isonicotinate (6l)**

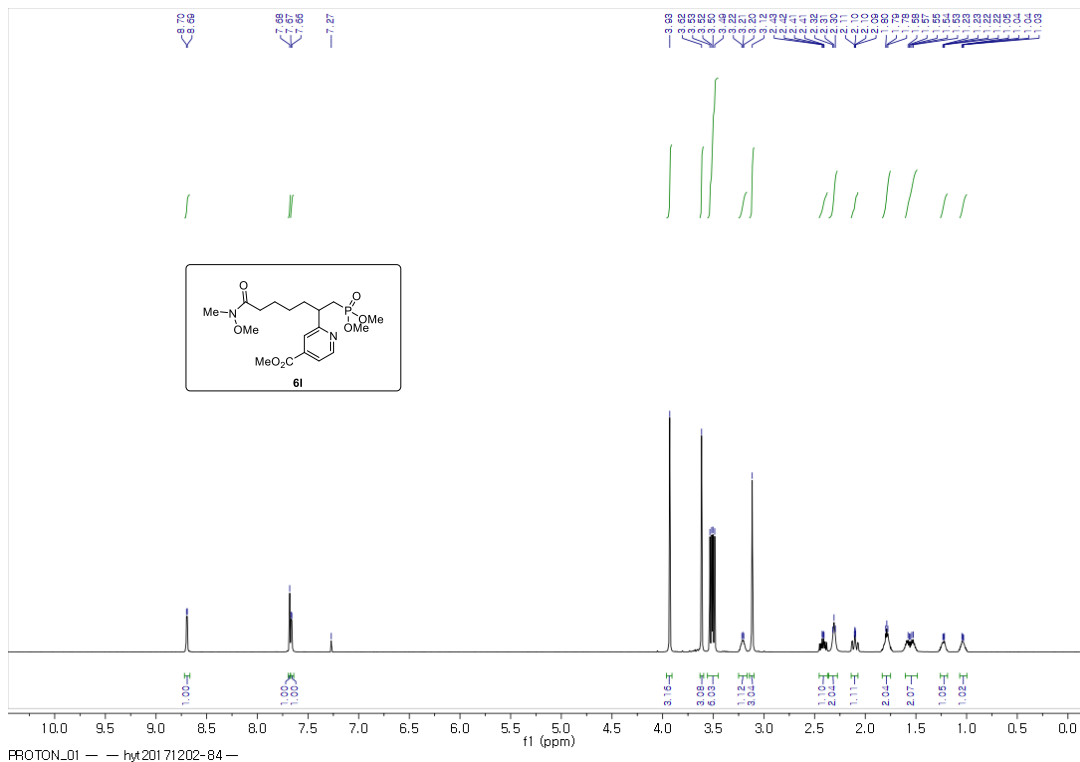

**600 MHz, <sup>1</sup>H NMR in CDCl<sub>3</sub>**

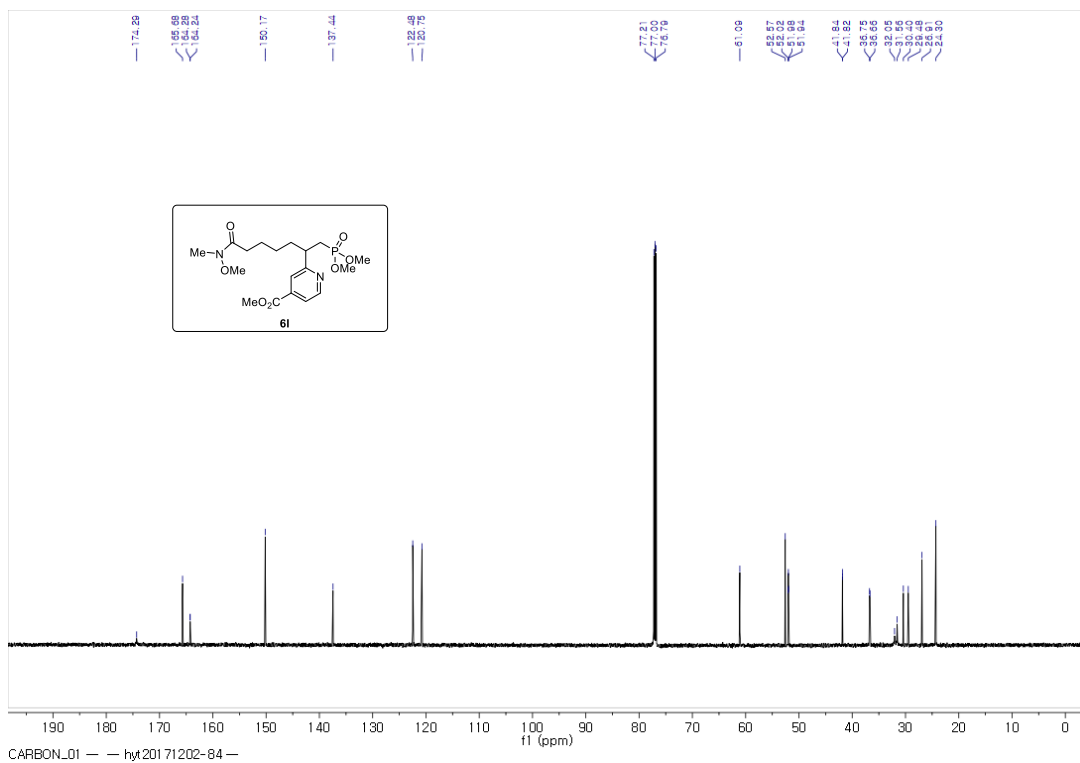

**150 MHz, <sup>13</sup>C NMR in CDCl<sub>3</sub>**



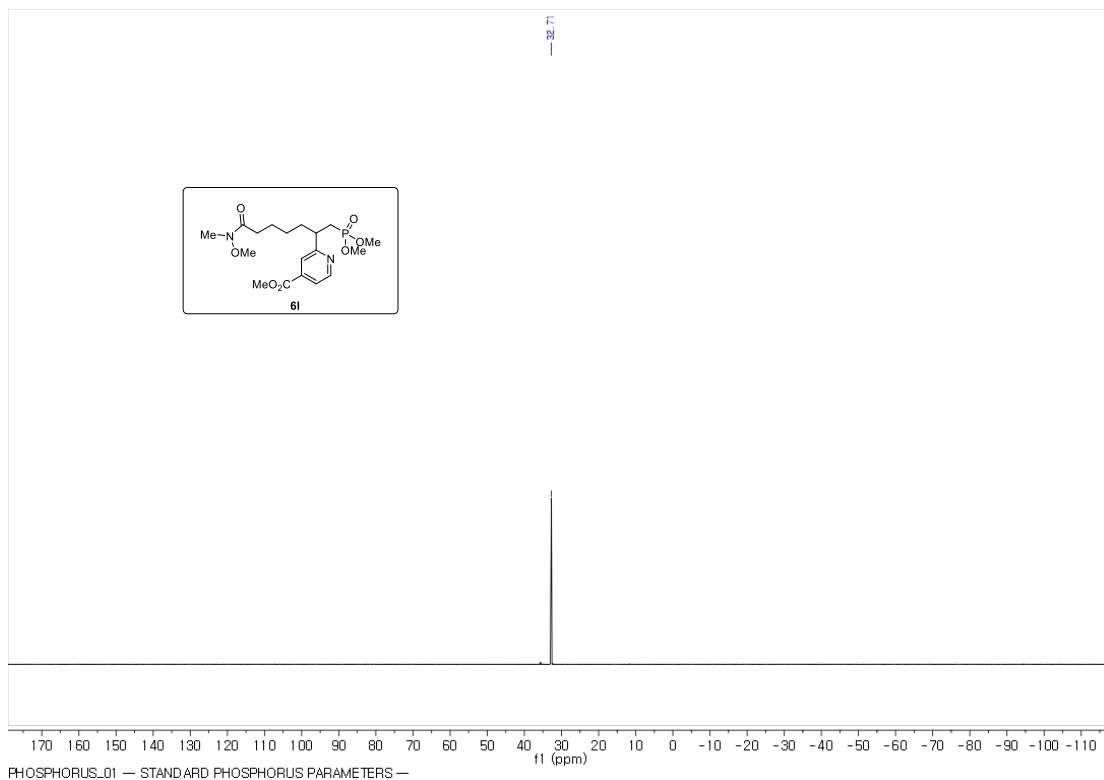

**243 MHz, <sup>31</sup>P NMR in CDCl<sub>3</sub>**

**methyl 2-(1-(dimethoxyphosphoryl)-5-oxohexan-2-yl)isonicotinate (6m)**

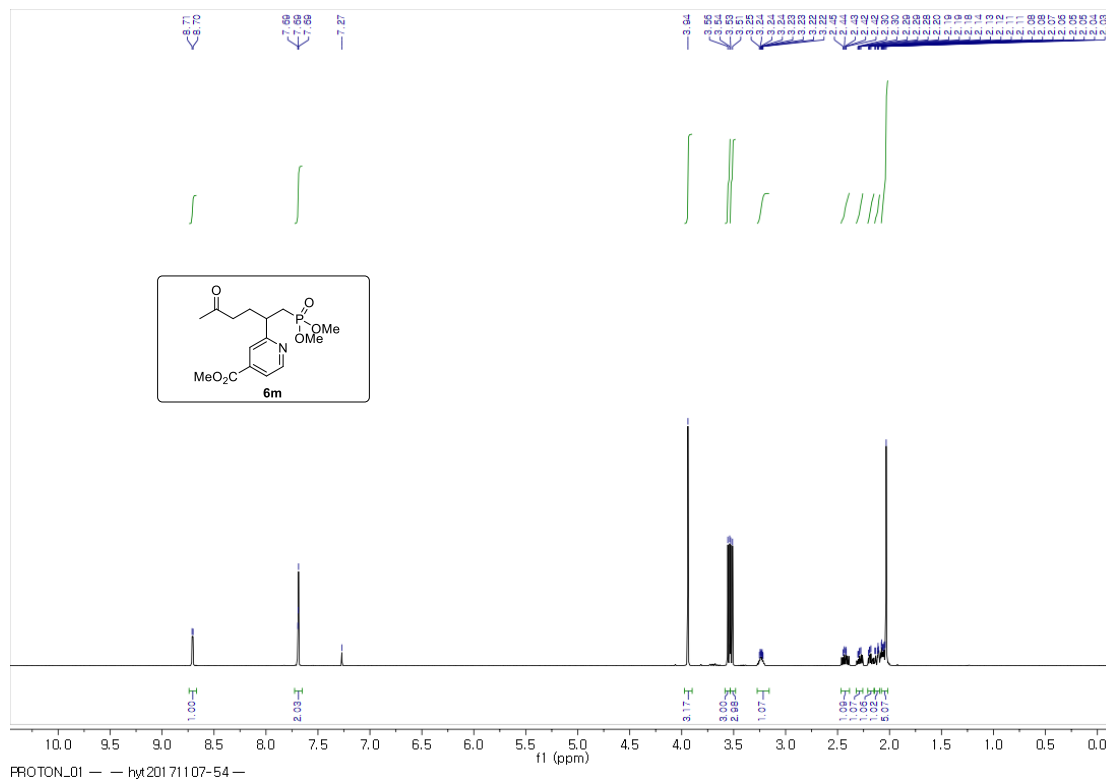

**600 MHz, <sup>1</sup>H NMR in CDCl<sub>3</sub>**

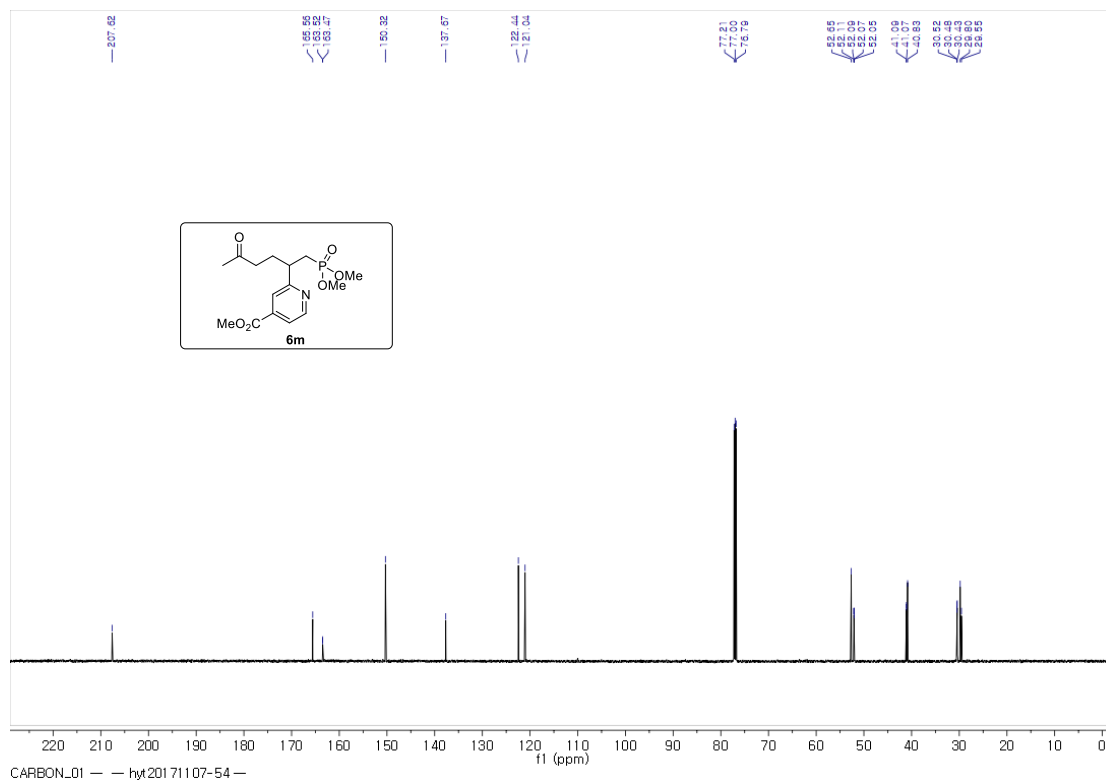

**150 MHz, <sup>13</sup>C NMR in CDCl<sub>3</sub>**

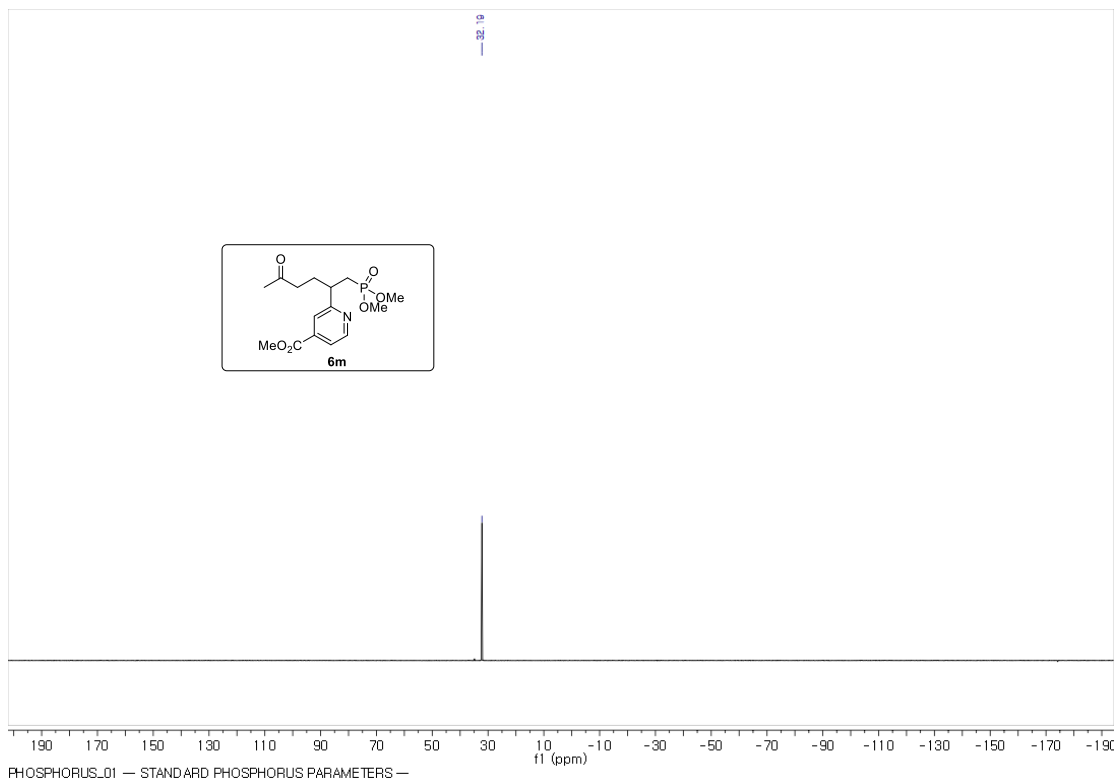

243 MHz,  $^{31}\text{P}$  NMR in  $\text{CDCl}_3$

**methyl 2-(1-(dimethoxyphosphoryl)-3-(trimethylsilyl)propan-2-yl)isonicotinate (6n)**

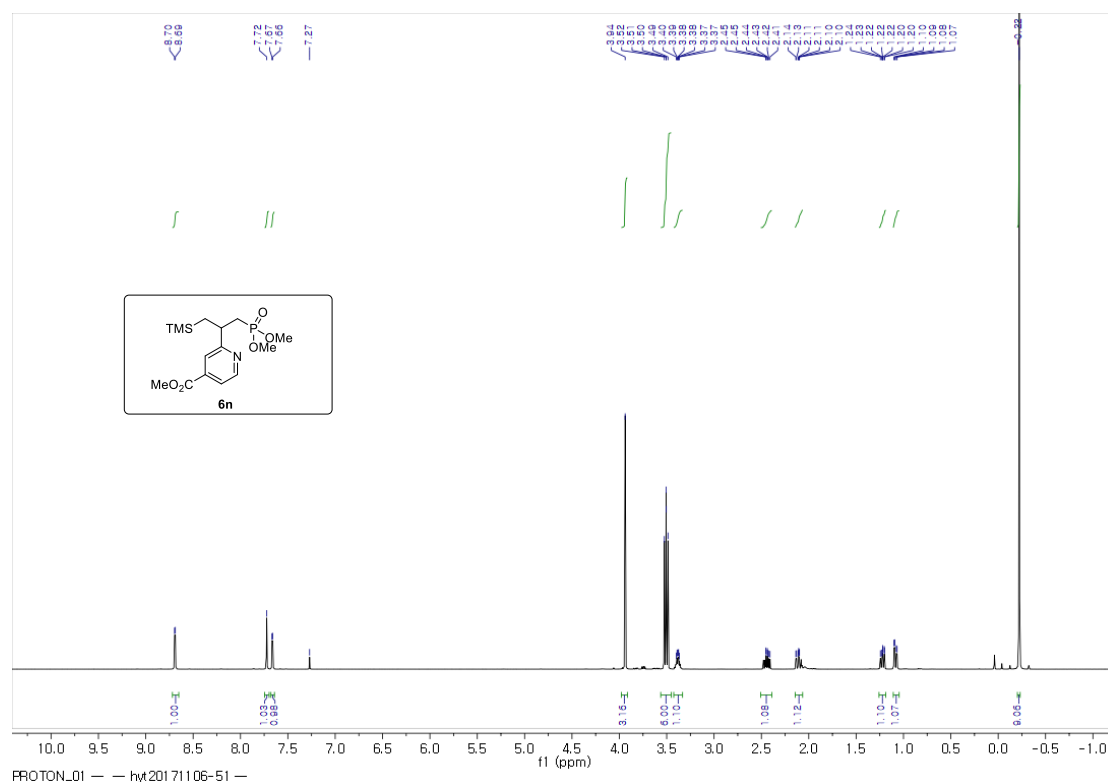

**600 MHz, <sup>1</sup>H NMR in CDCl<sub>3</sub>**

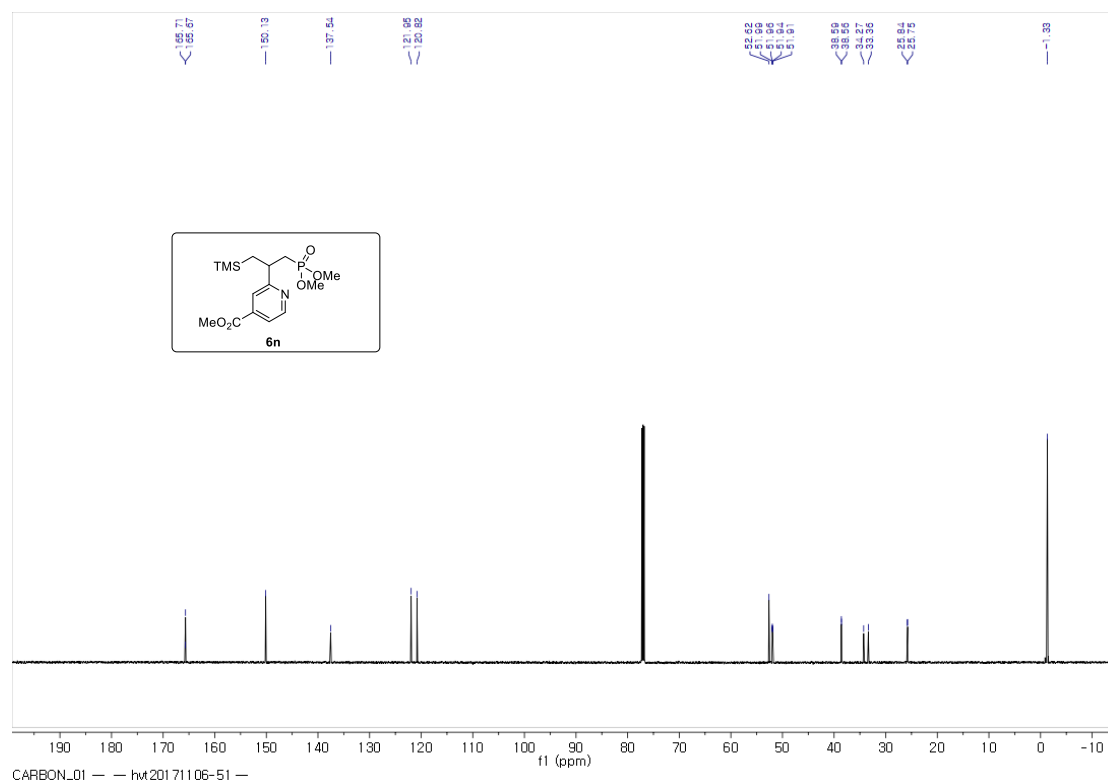

**150 MHz, <sup>13</sup>C NMR in CDCl<sub>3</sub>**

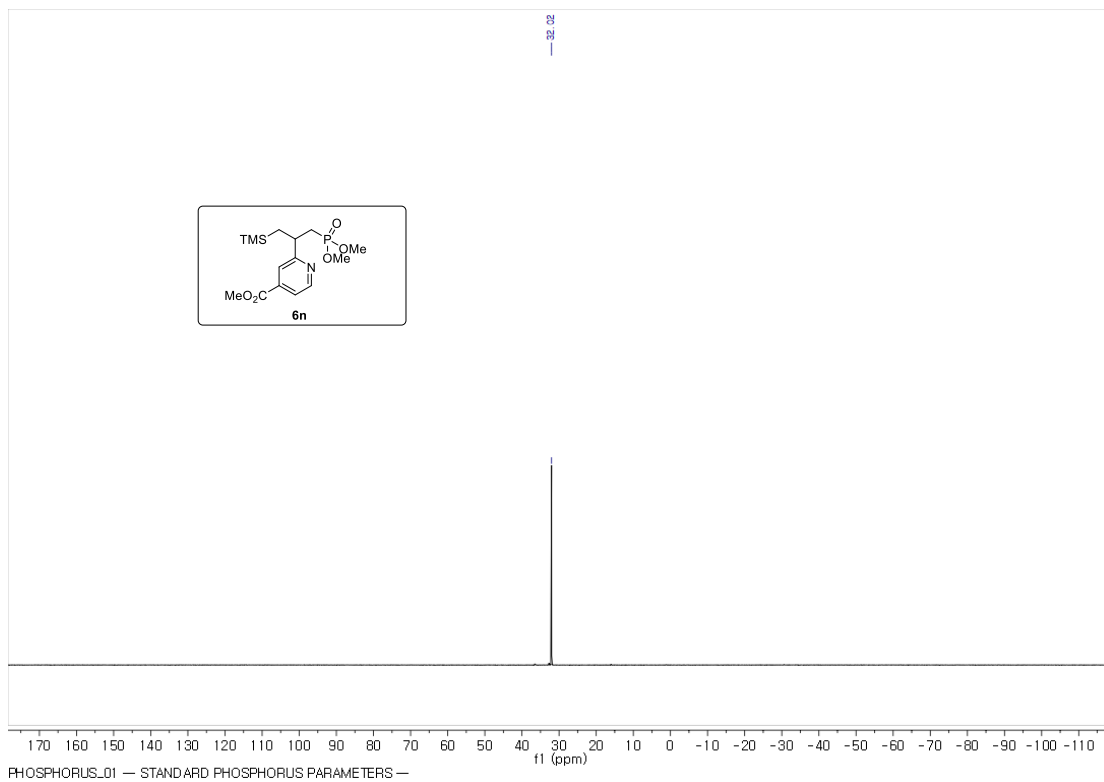

243 MHz,  $^{31}\text{P}$  NMR in  $\text{CDCl}_3$

**methyl 2-(1-(dimethoxyphosphoryl)-4-phenylbutan-2-yl)isonicotinate (6o)**

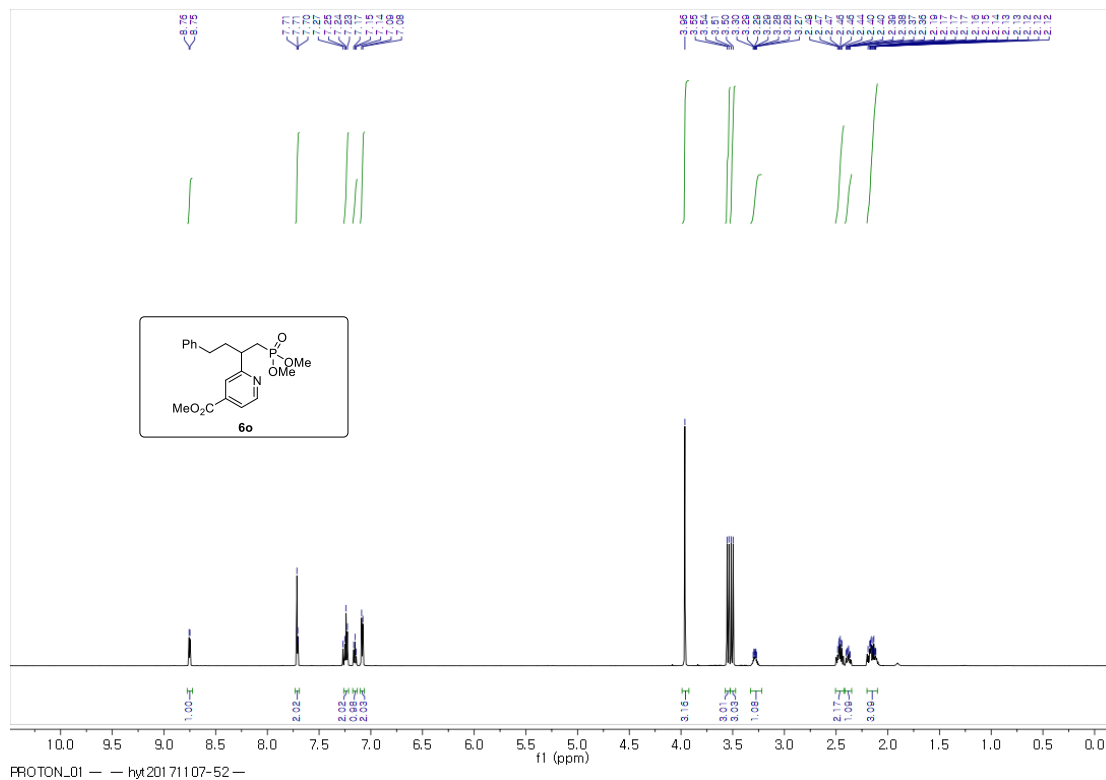

**600 MHz, <sup>1</sup>H NMR in CDCl<sub>3</sub>**

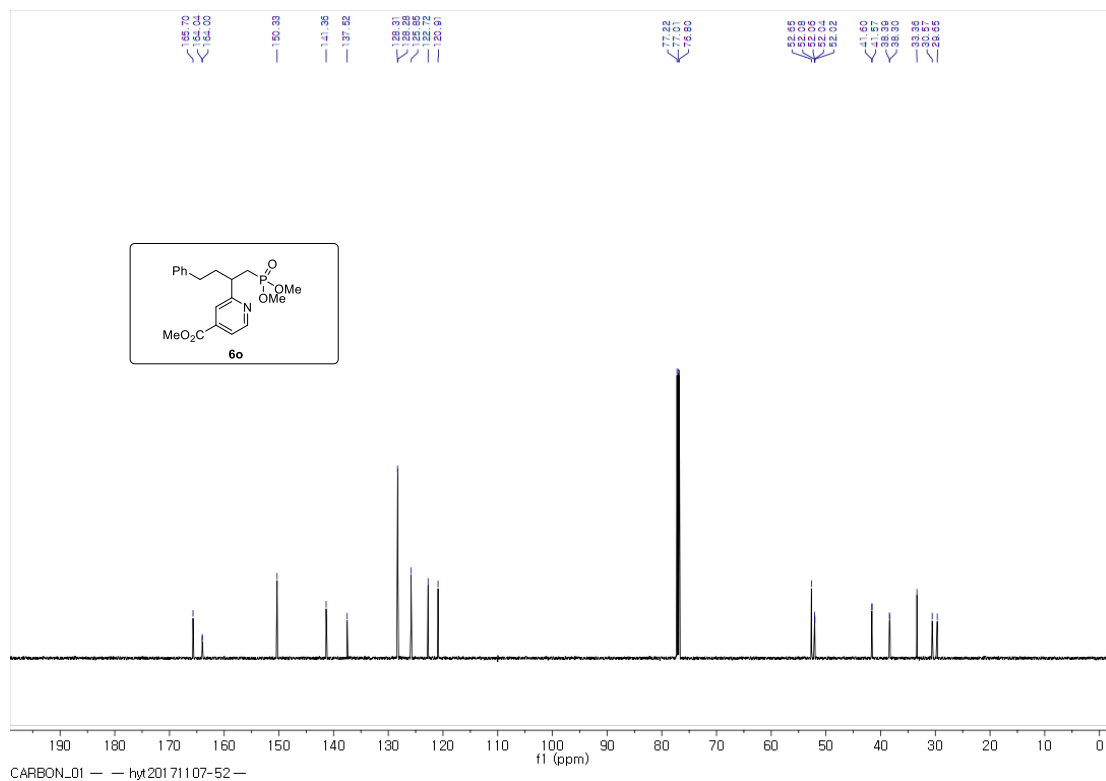

**150 MHz, <sup>13</sup>C NMR in CDCl<sub>3</sub>**

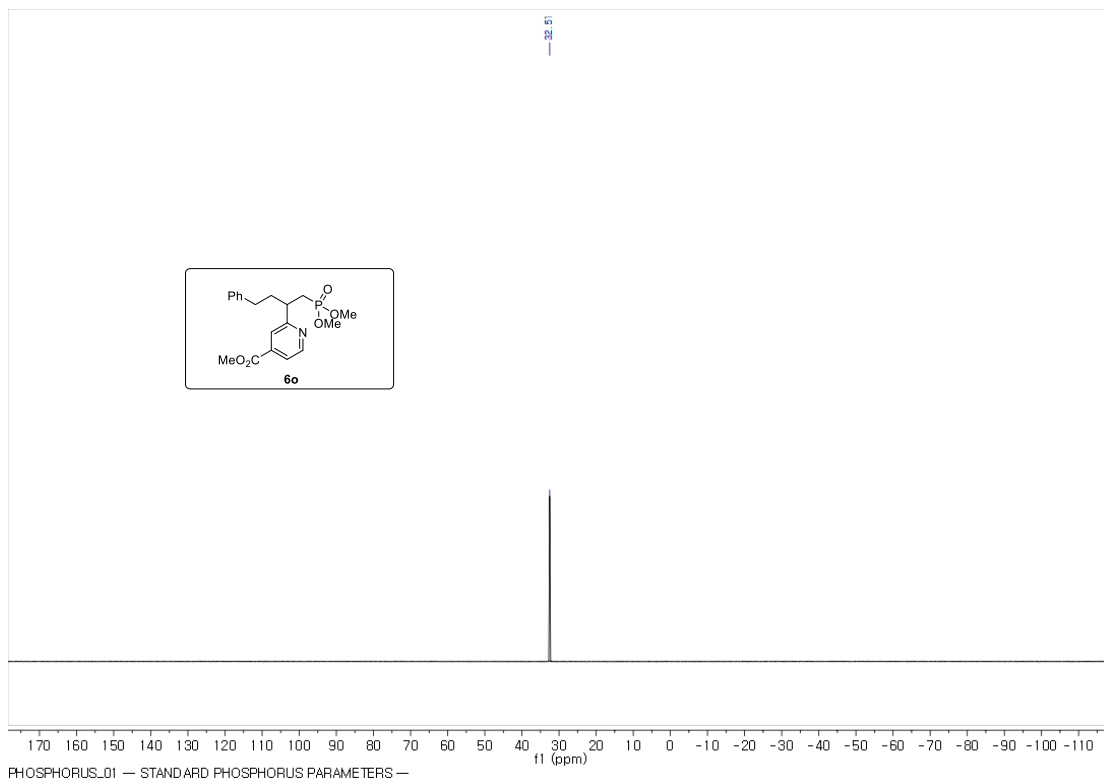

243 MHz, <sup>31</sup>P NMR in CDCl<sub>3</sub>

**methyl 2-(1-(dimethoxyphosphoryl)-3-phenylpropan-2-yl)isonicotinate (6p)**

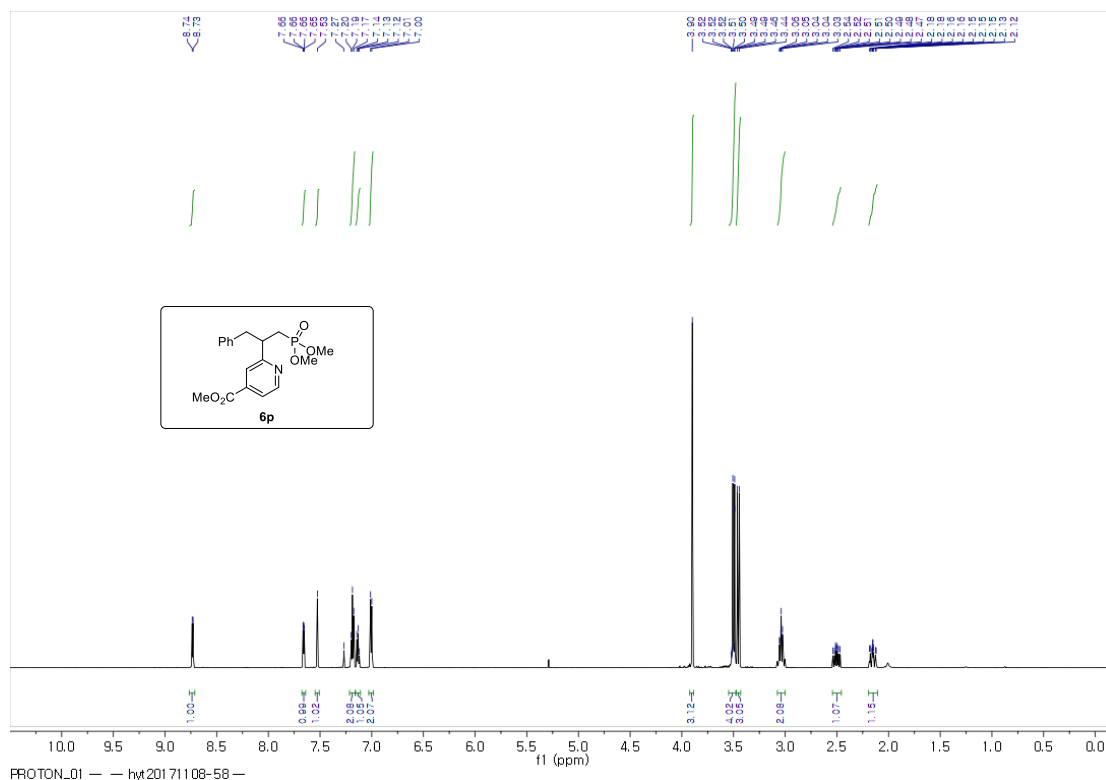

**600 MHz, <sup>1</sup>H NMR in CDCl<sub>3</sub>**

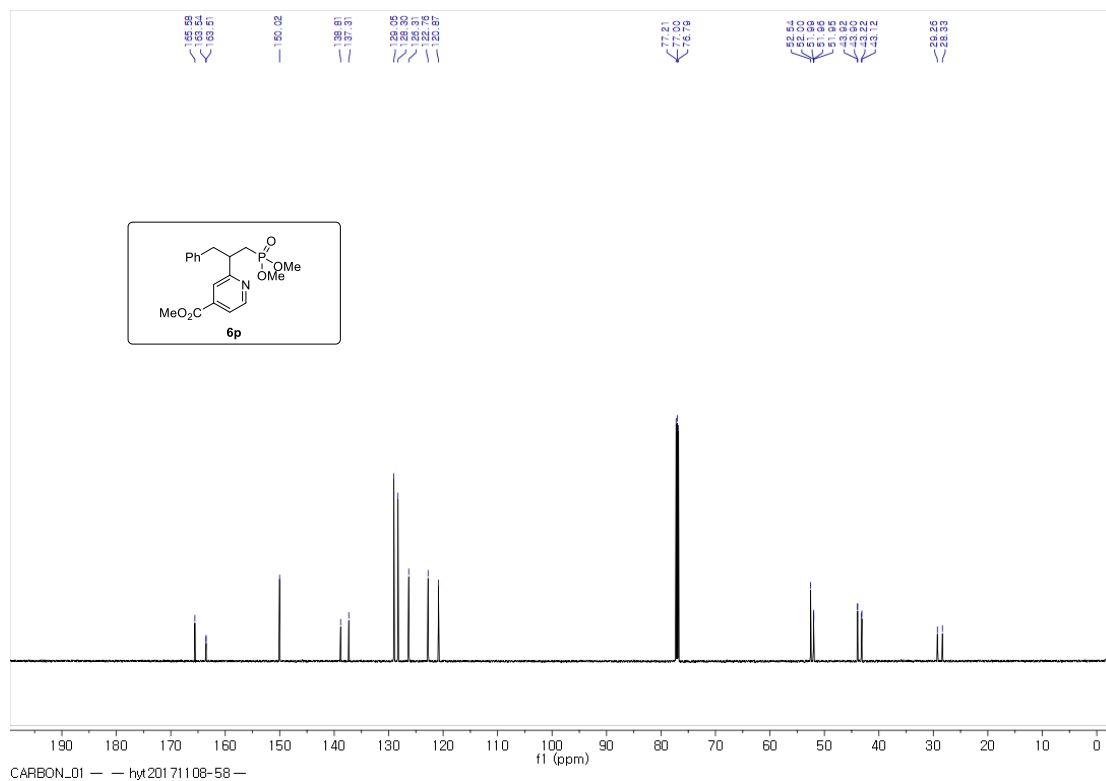

**150 MHz, <sup>13</sup>C NMR in CDCl<sub>3</sub>**



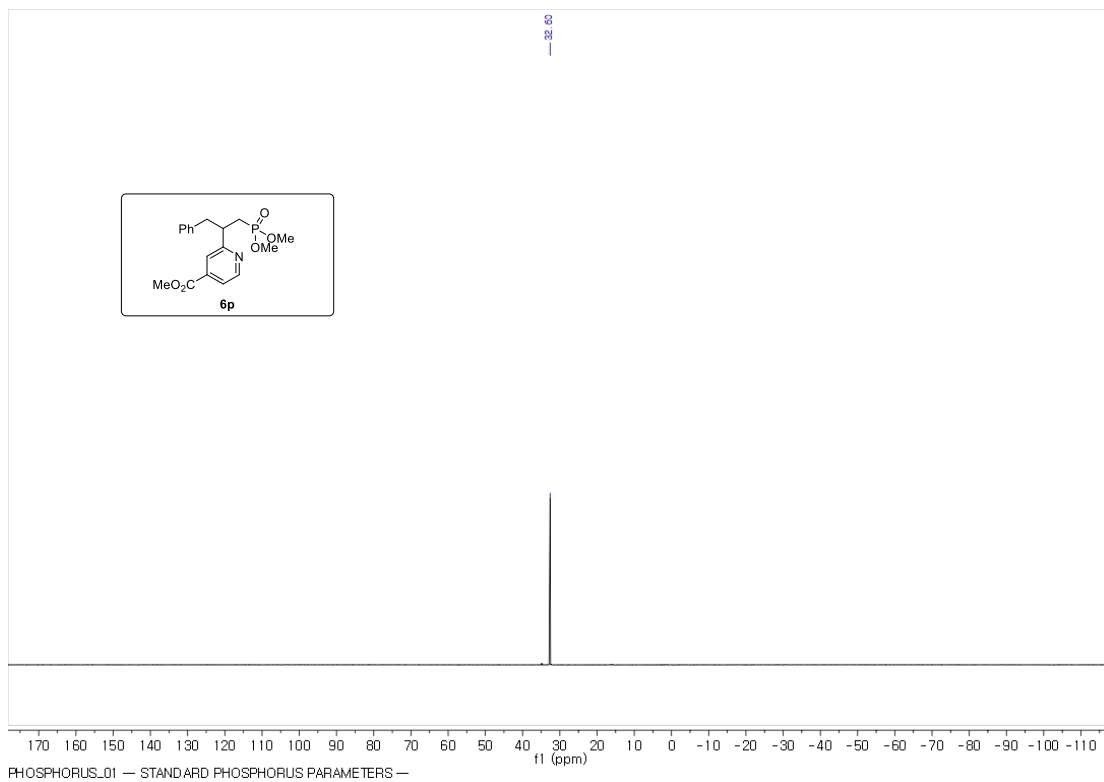

**243 MHz, <sup>31</sup>P NMR in CDCl<sub>3</sub>**

**methyl 2-(1-(dimethoxyphosphoryl)-4-methylpentan-2-yl)isonicotinate (6q)**

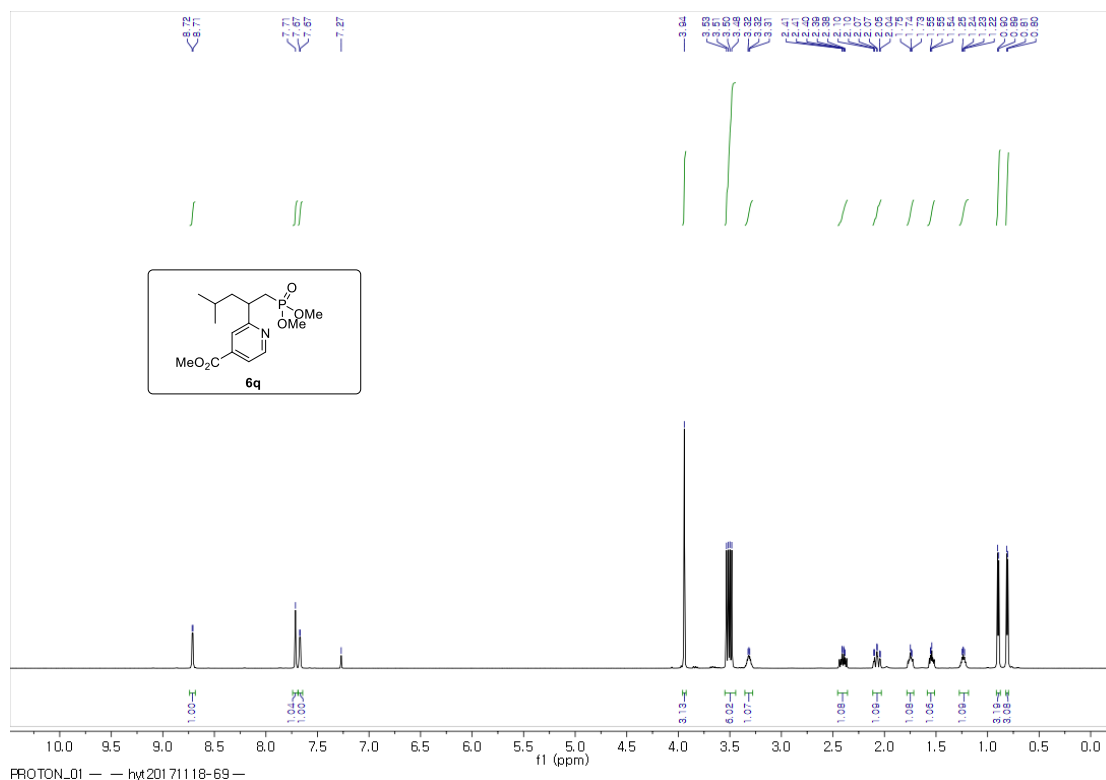

**600 MHz, <sup>1</sup>H NMR in CDCl<sub>3</sub>**

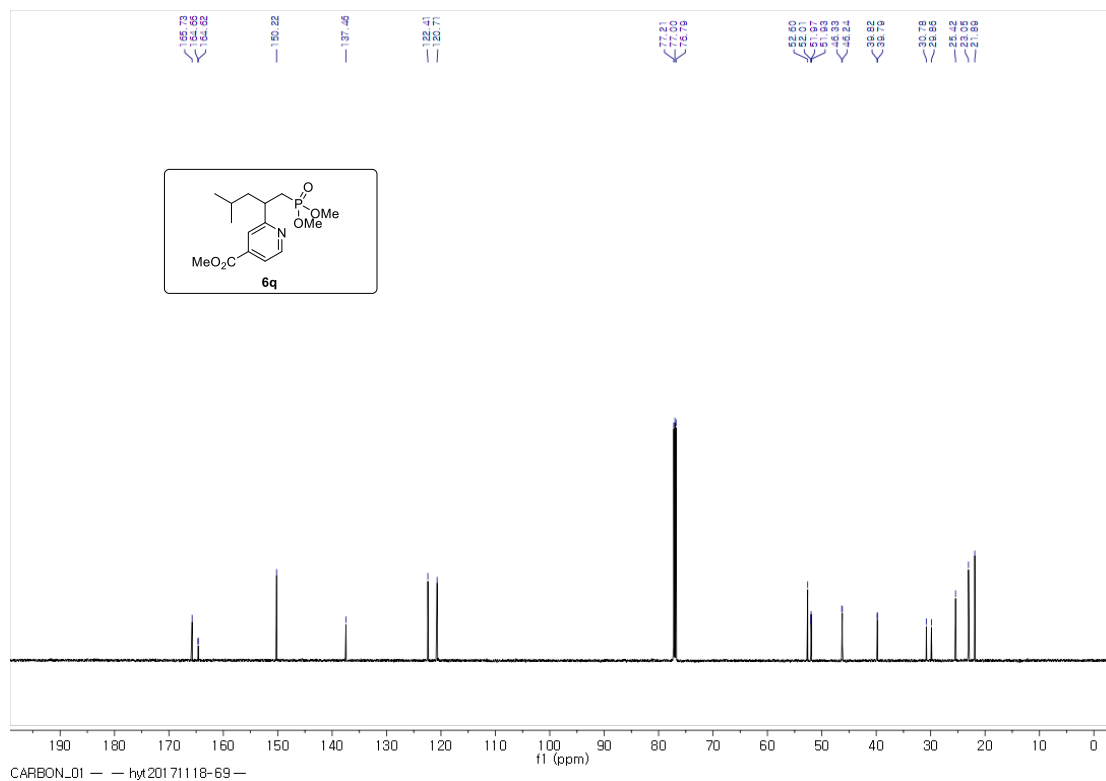

**150 MHz, <sup>13</sup>C NMR in CDCl<sub>3</sub>**

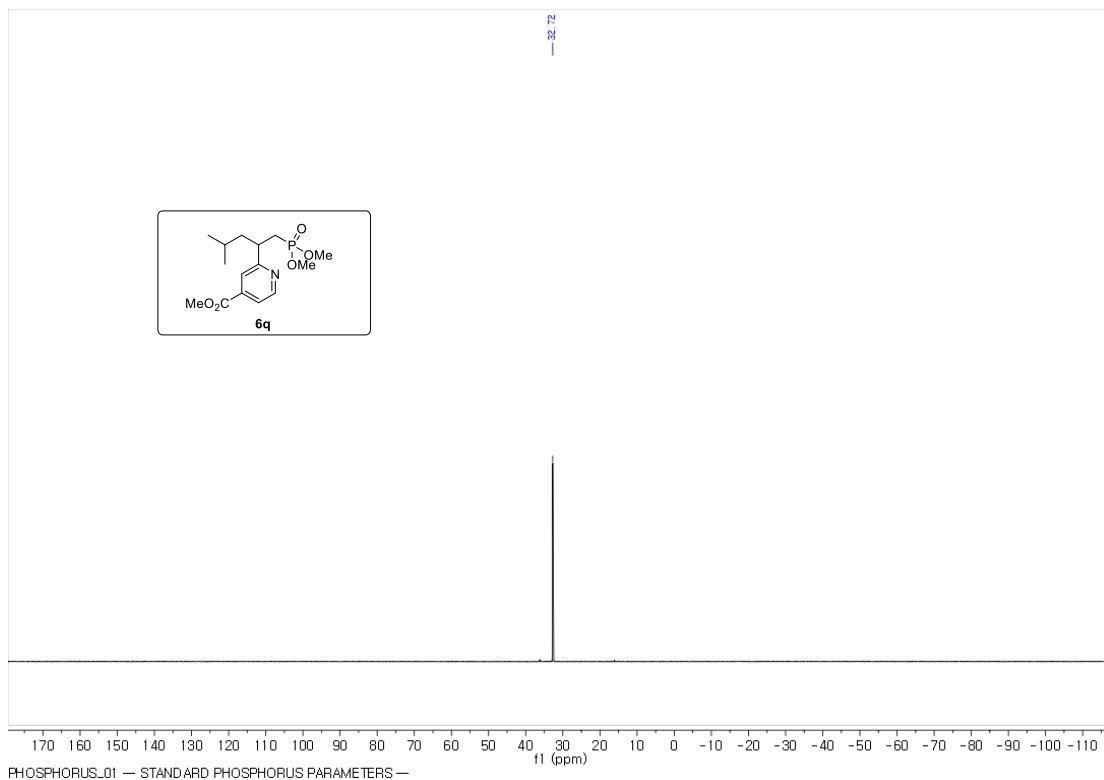

**243 MHz,  $^{31}\text{P}$  NMR in  $\text{CDCl}_3$**



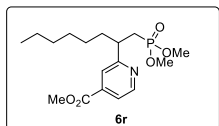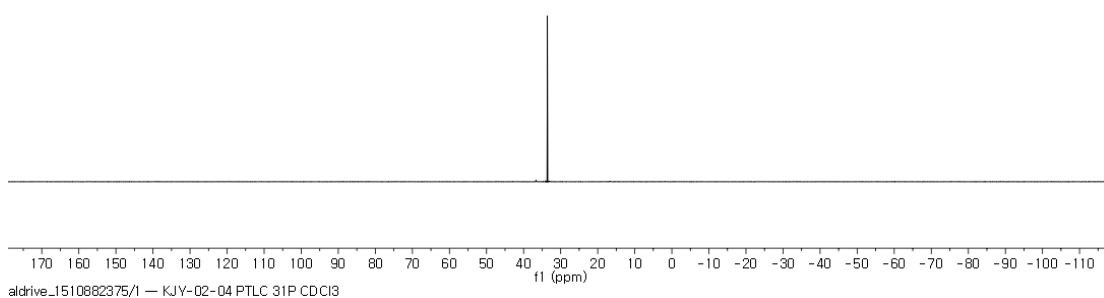

**162 MHz, <sup>31</sup>P NMR in CDCl<sub>3</sub>**

**methyl 2-(1-cyclohexyl-2-(dimethoxyphosphoryl)ethyl)isonicotinate (6s)**

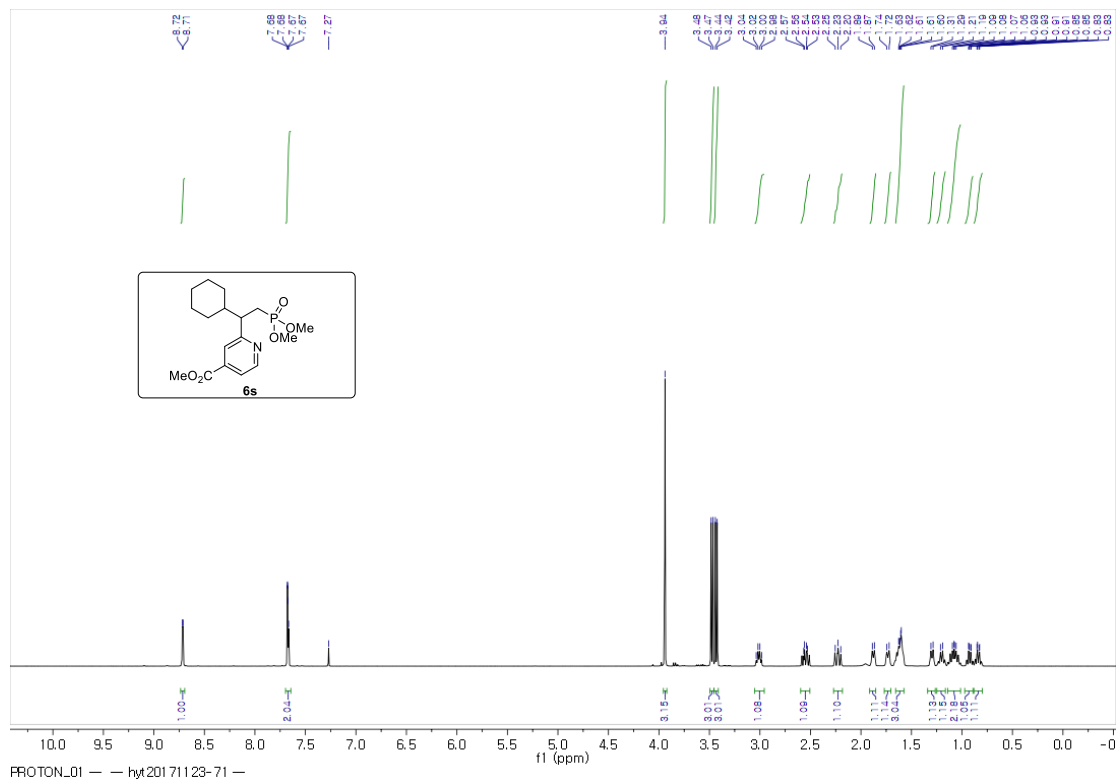

**600 MHz, <sup>1</sup>H NMR in CDCl<sub>3</sub>**

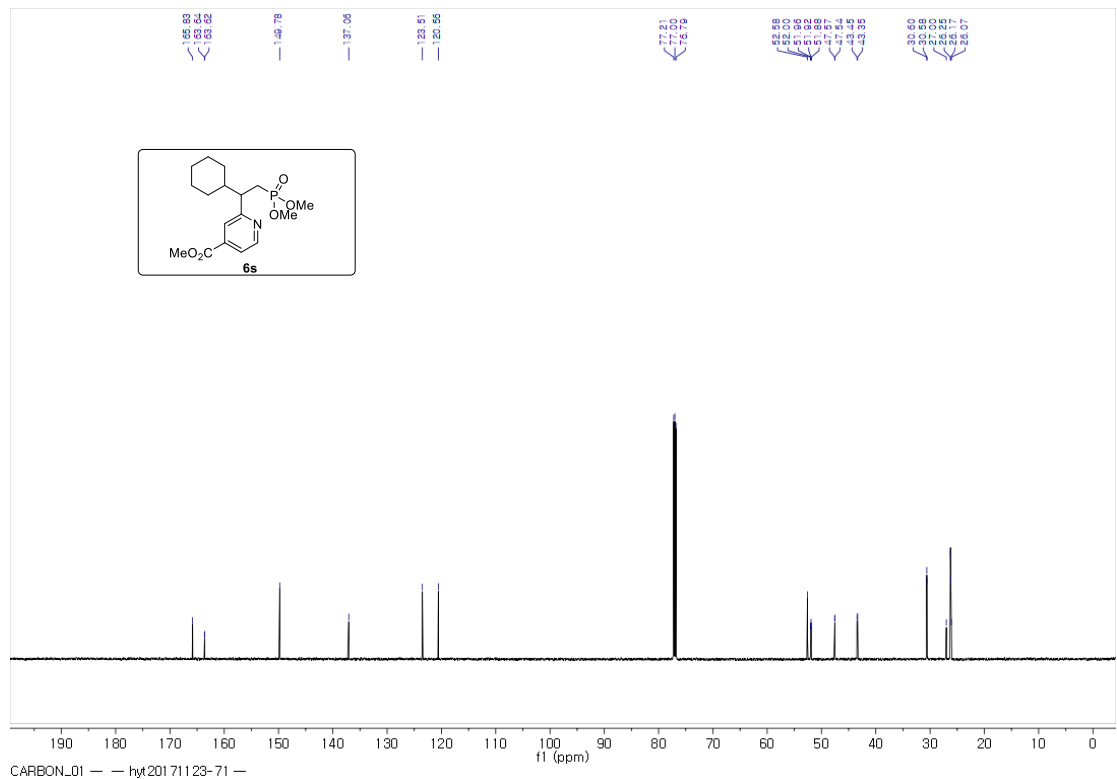

**150 MHz, <sup>13</sup>C NMR in CDCl<sub>3</sub>**

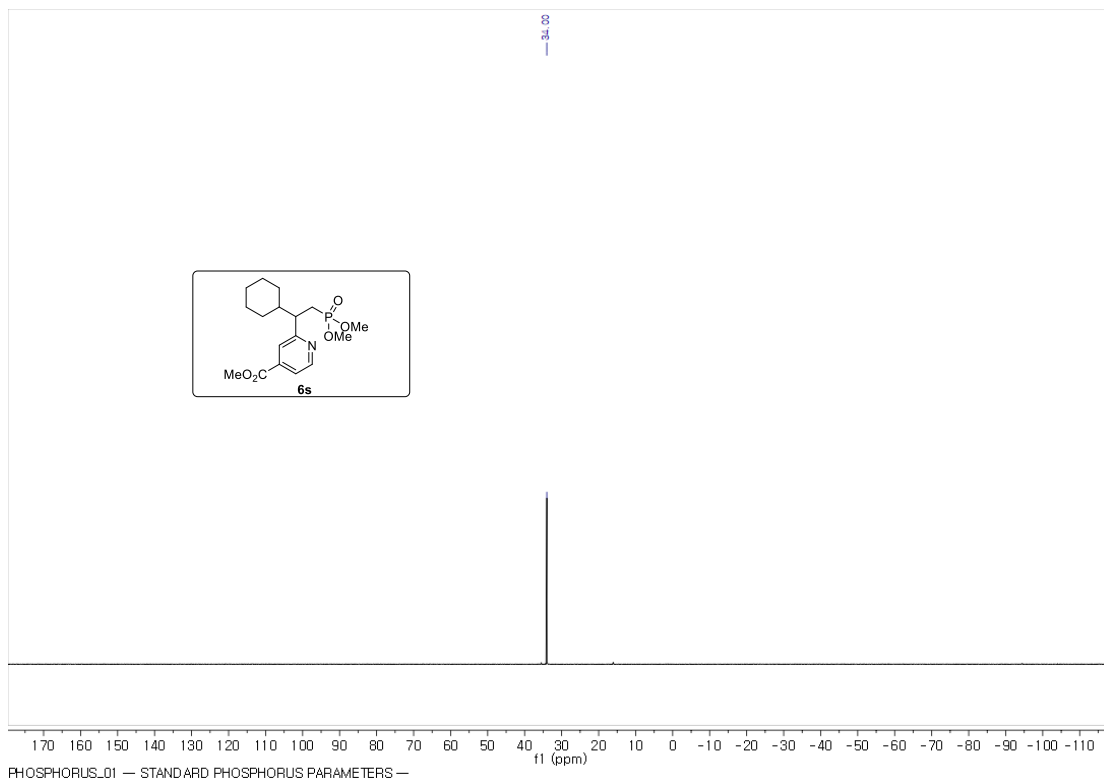

243 MHz, <sup>31</sup>P NMR in CDCl<sub>3</sub>

**methyl 2-((1S,2R)-2-(dimethoxyphosphoryl)cyclopentyl)isonicotinate (6t).**

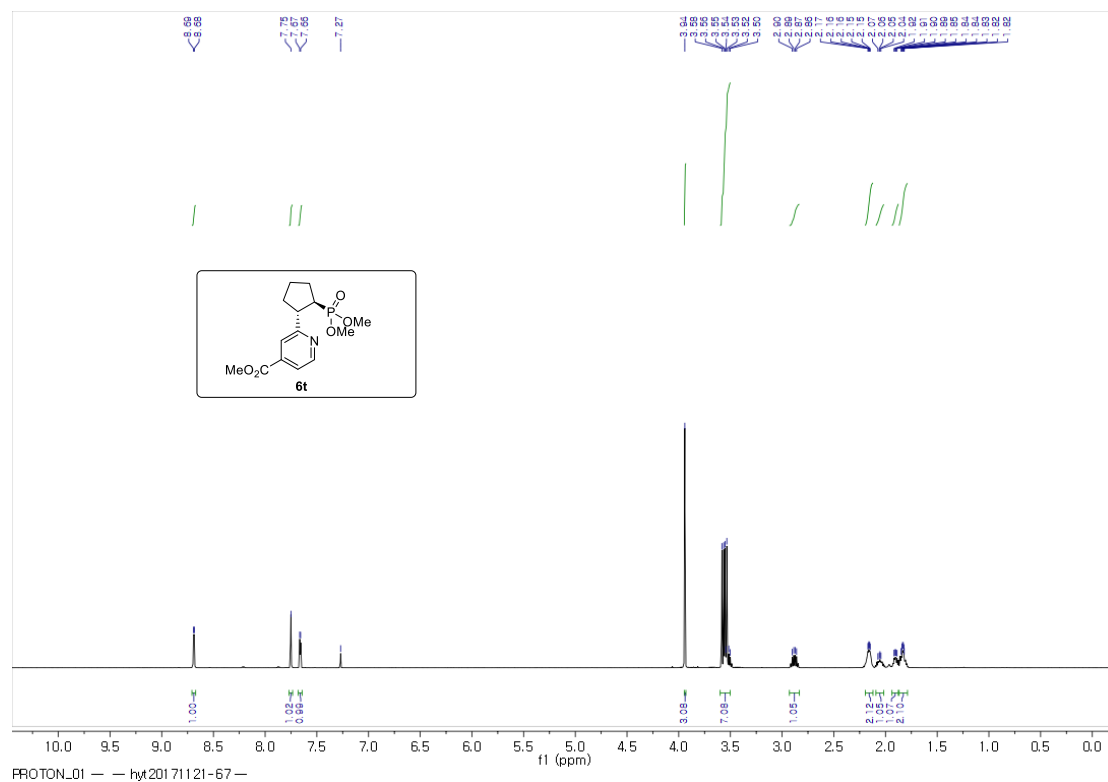

**600 MHz, <sup>1</sup>H NMR in CDCl<sub>3</sub>**

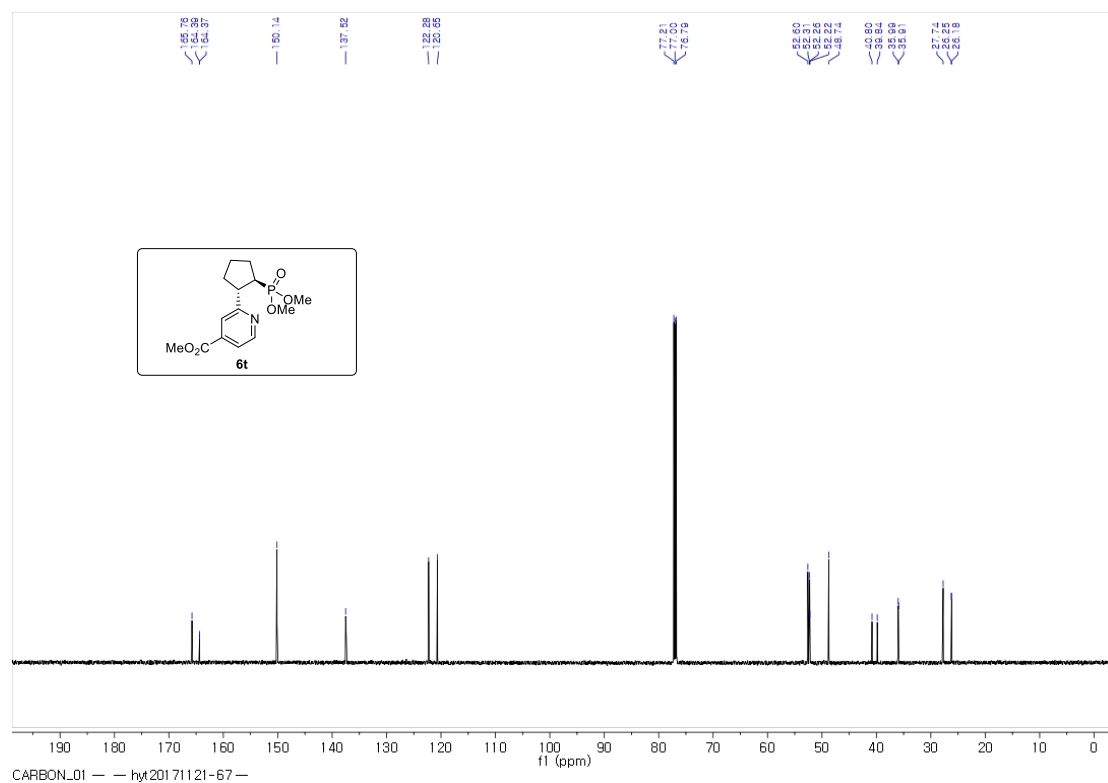

**150 MHz, <sup>13</sup>C NMR in CDCl<sub>3</sub>**



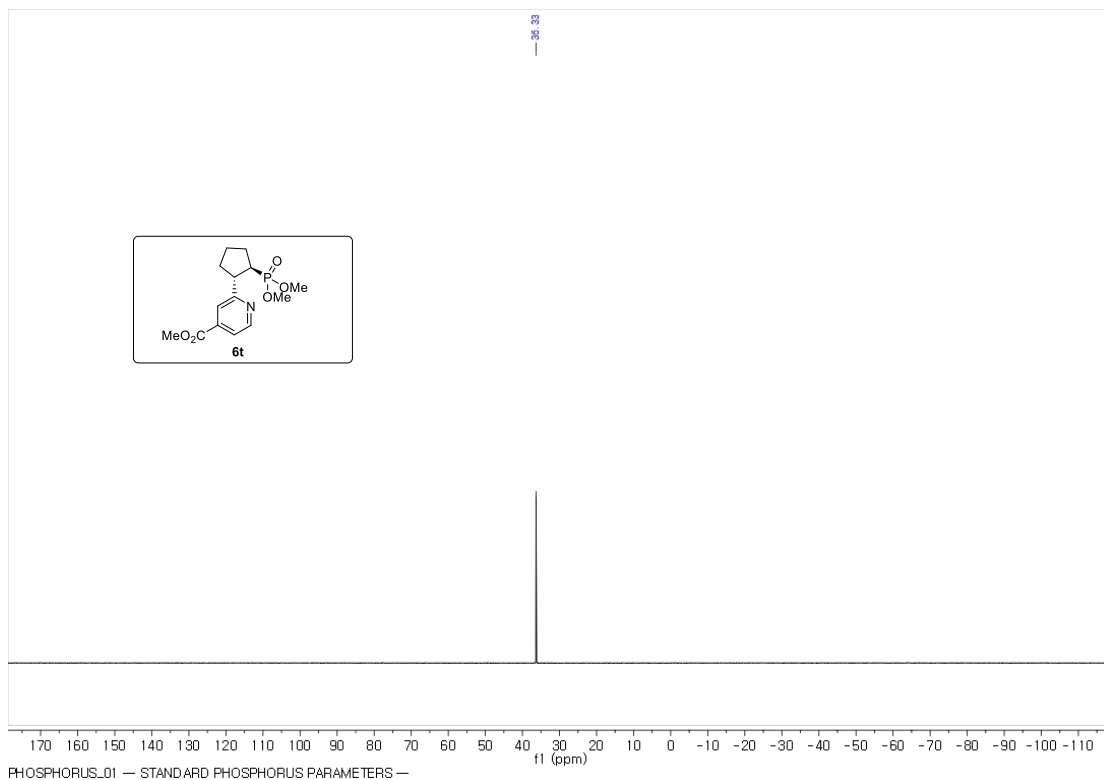

**243 MHz,  $^{31}\text{P}$  NMR in  $\text{CDCl}_3$**

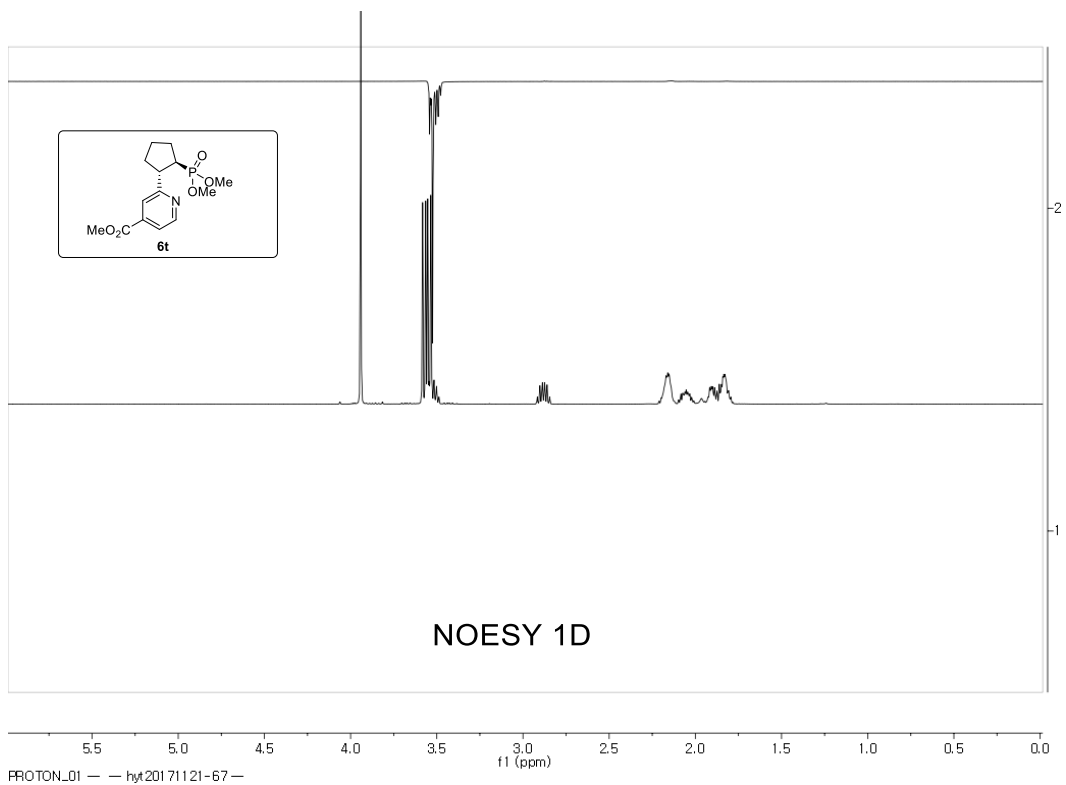

**NOESY 1D in  $\text{CDCl}_3$**

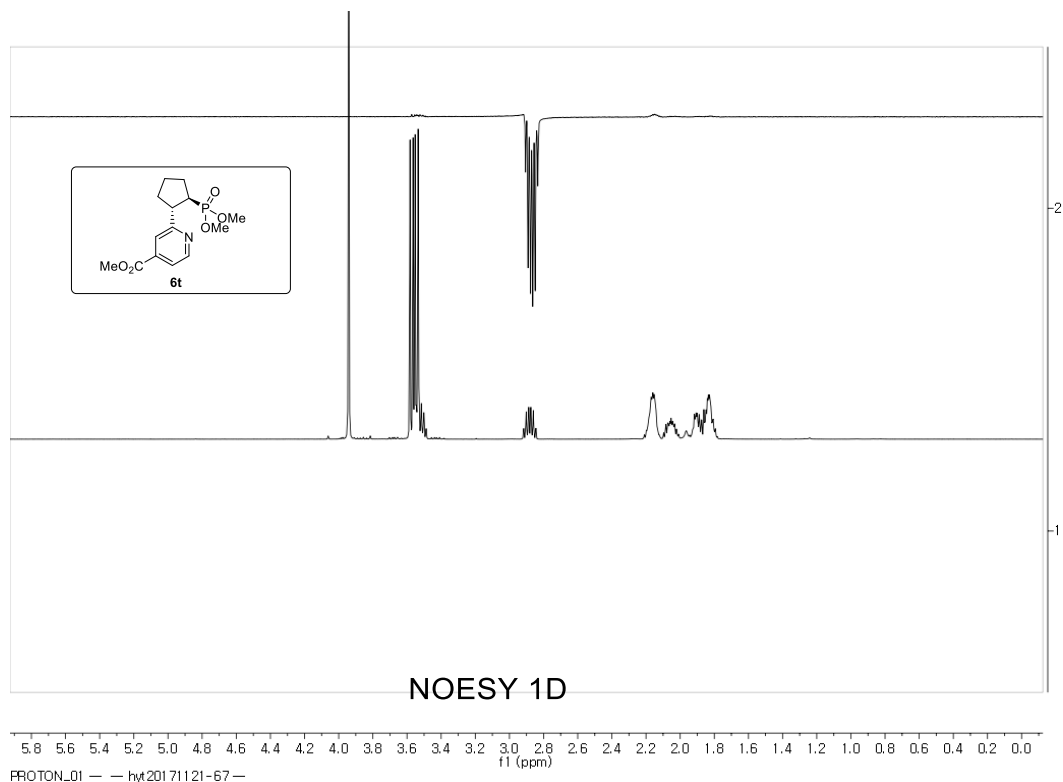

**NOESY 1D in CDCl<sub>3</sub>**

**methyl 2-((1S,2R)-2-(dimethoxyphosphoryl)cyclohexyl)isonicotinate (6u)**

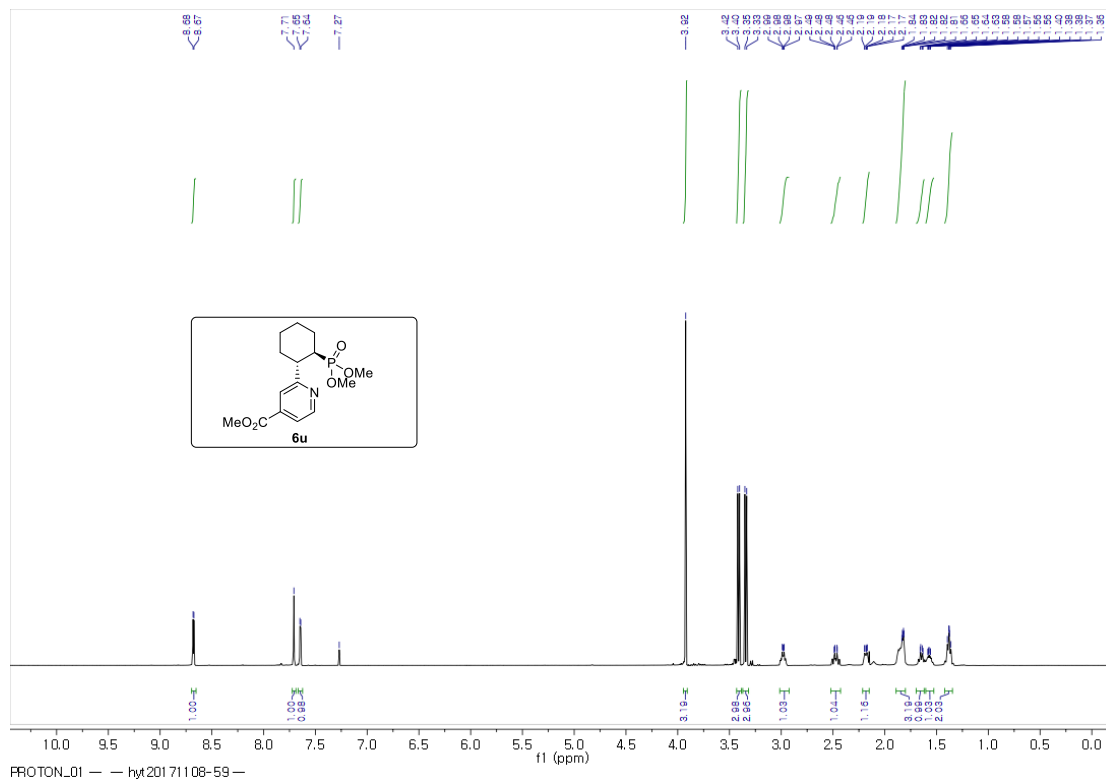

**600 MHz, <sup>1</sup>H NMR in CDCl<sub>3</sub>**

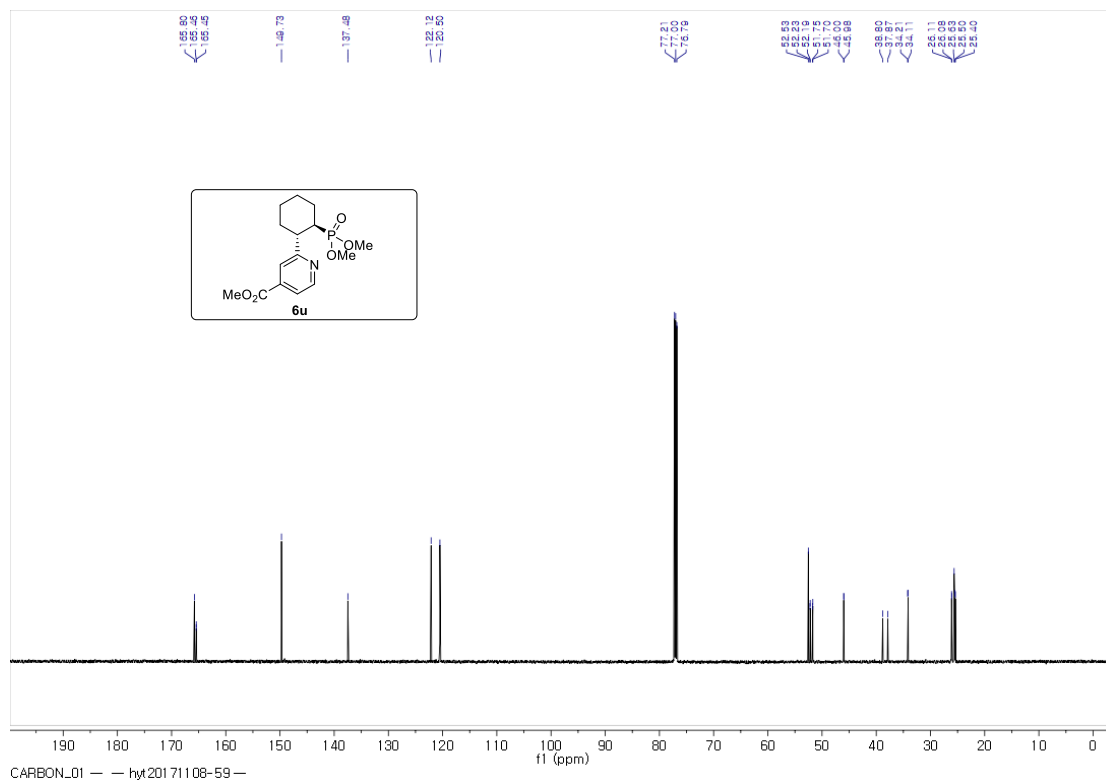

**150 MHz, <sup>13</sup>C NMR in CDCl<sub>3</sub>**

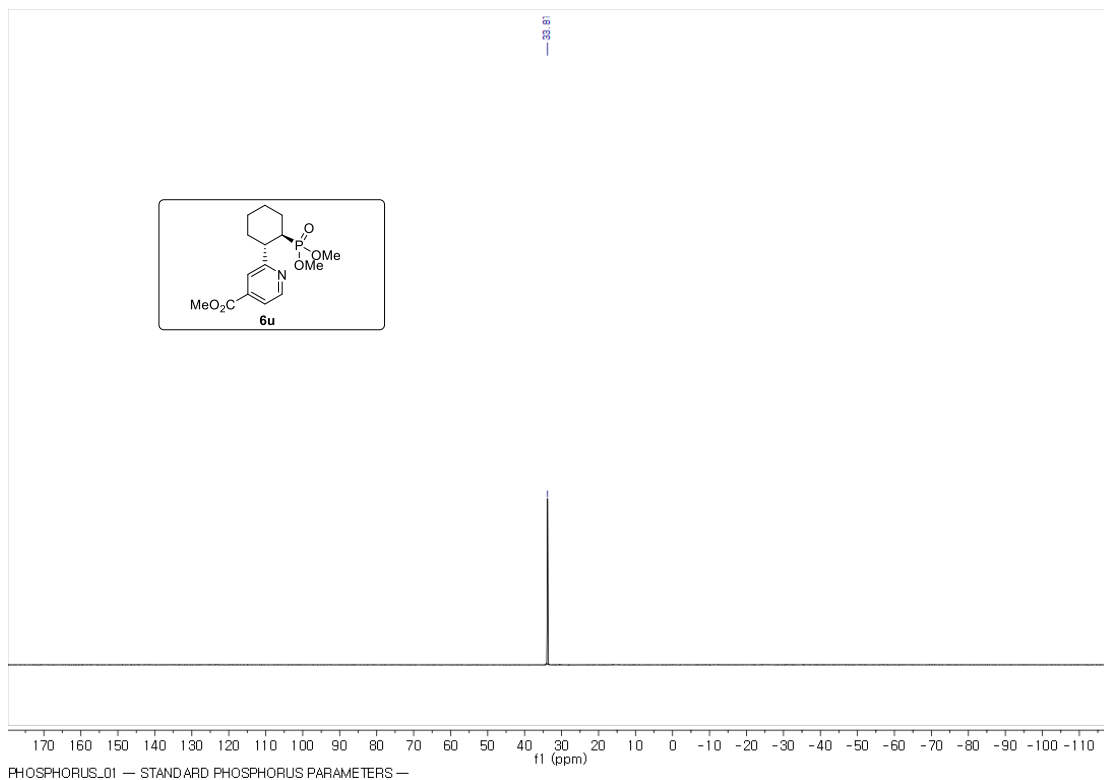

**243 MHz, <sup>31</sup>P NMR in CDCl<sub>3</sub>**

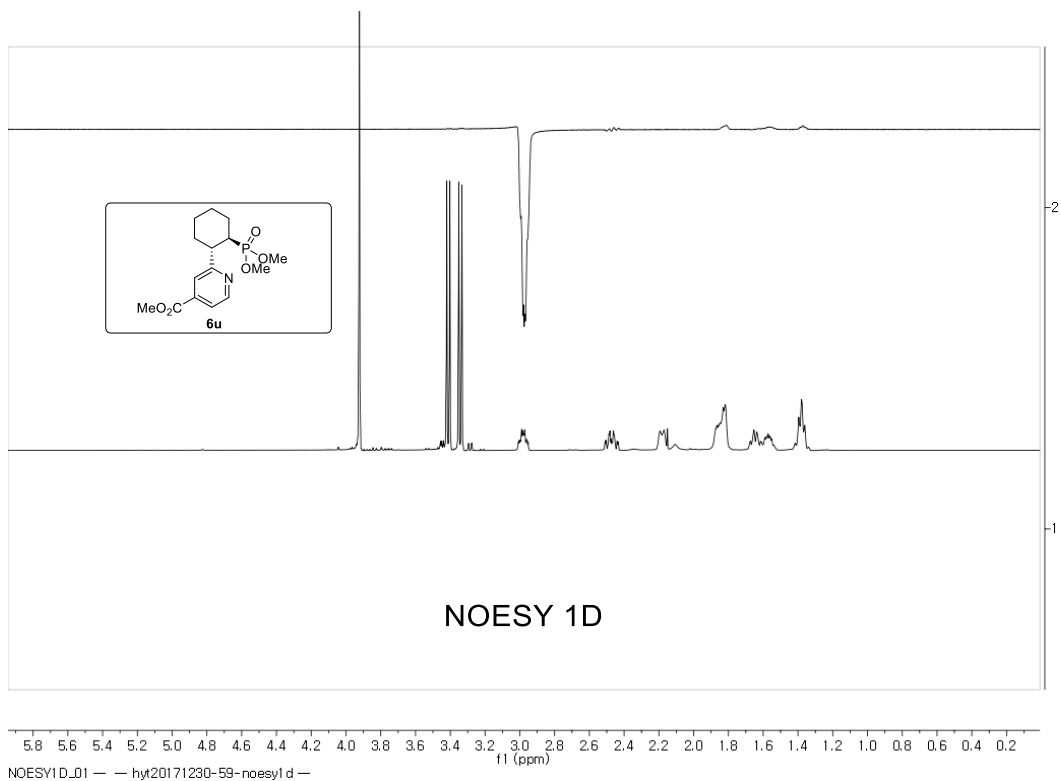

**NOESY 1D in CDCl<sub>3</sub>**

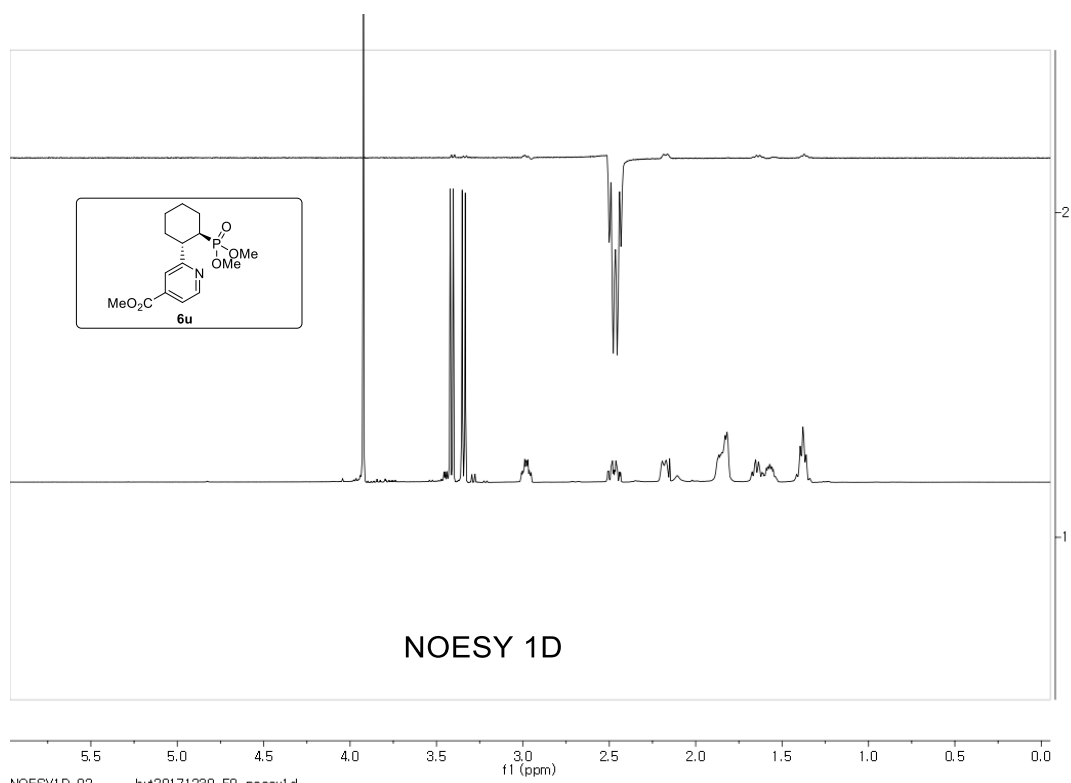

**NOESY 1D in CDCl<sub>3</sub>**

**methyl 2-((1S,2R)-2-(dimethoxyphosphoryl)cycloheptyl)isonicotinate (6v)**

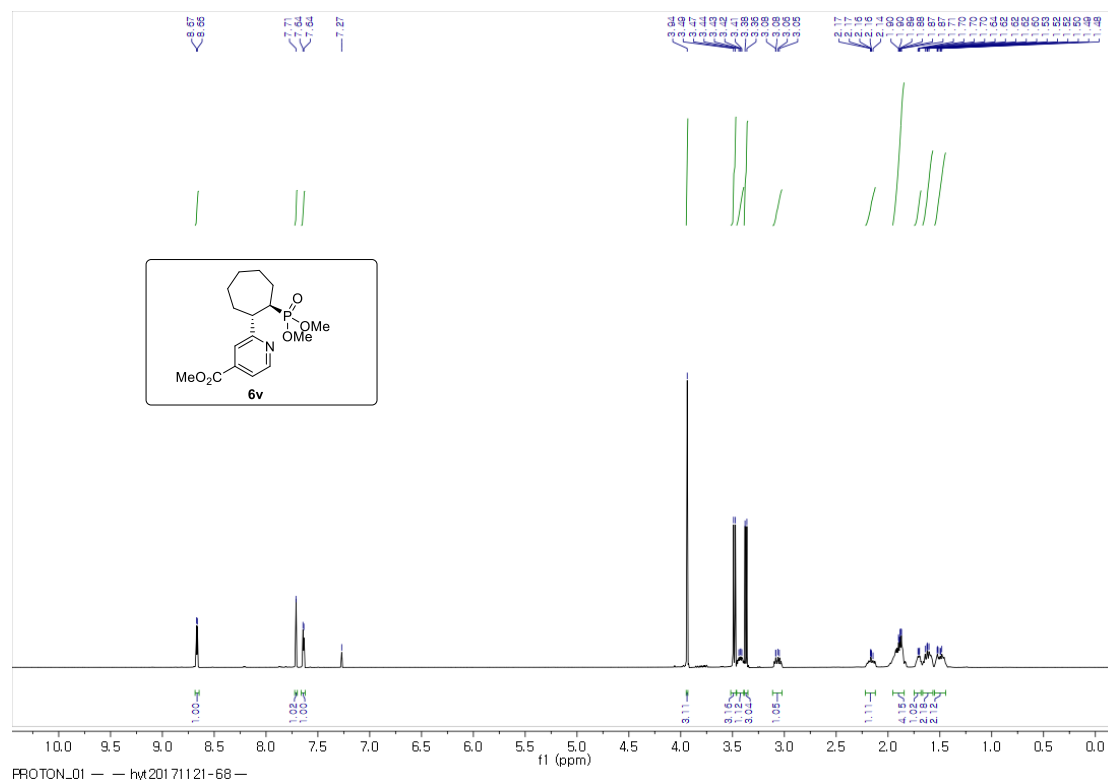

**600 MHz, <sup>1</sup>H NMR in CDCl<sub>3</sub>**

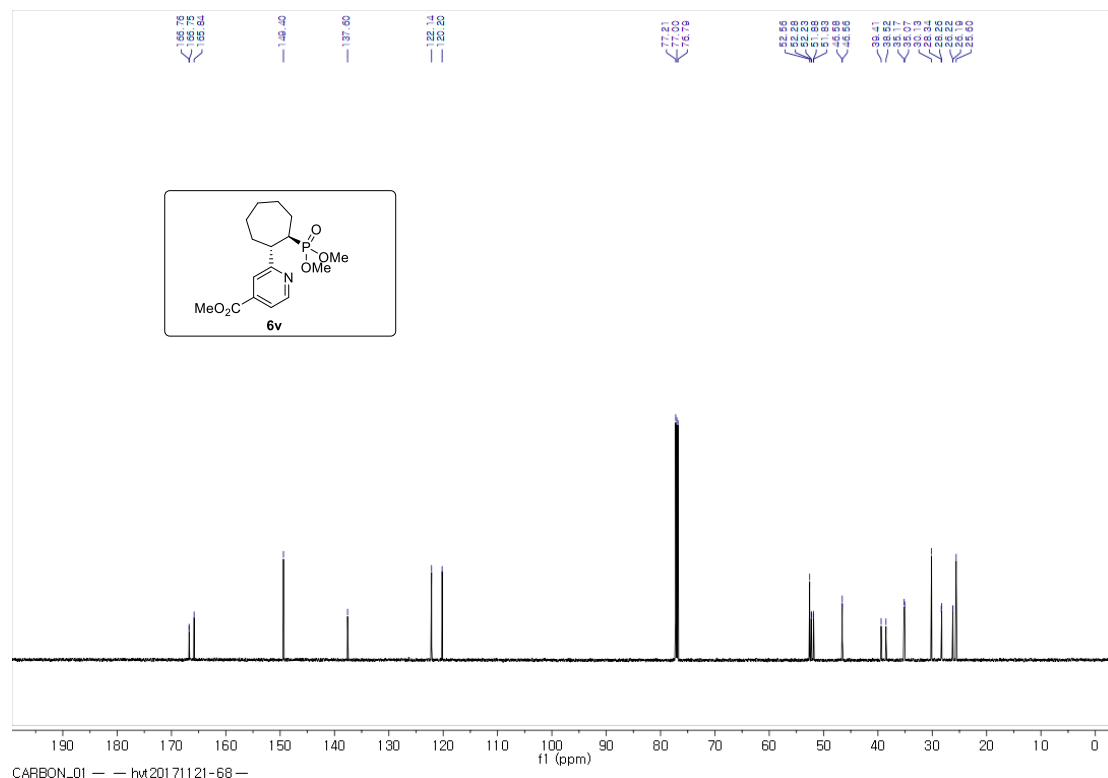

**150 MHz, <sup>13</sup>C NMR in CDCl<sub>3</sub>**

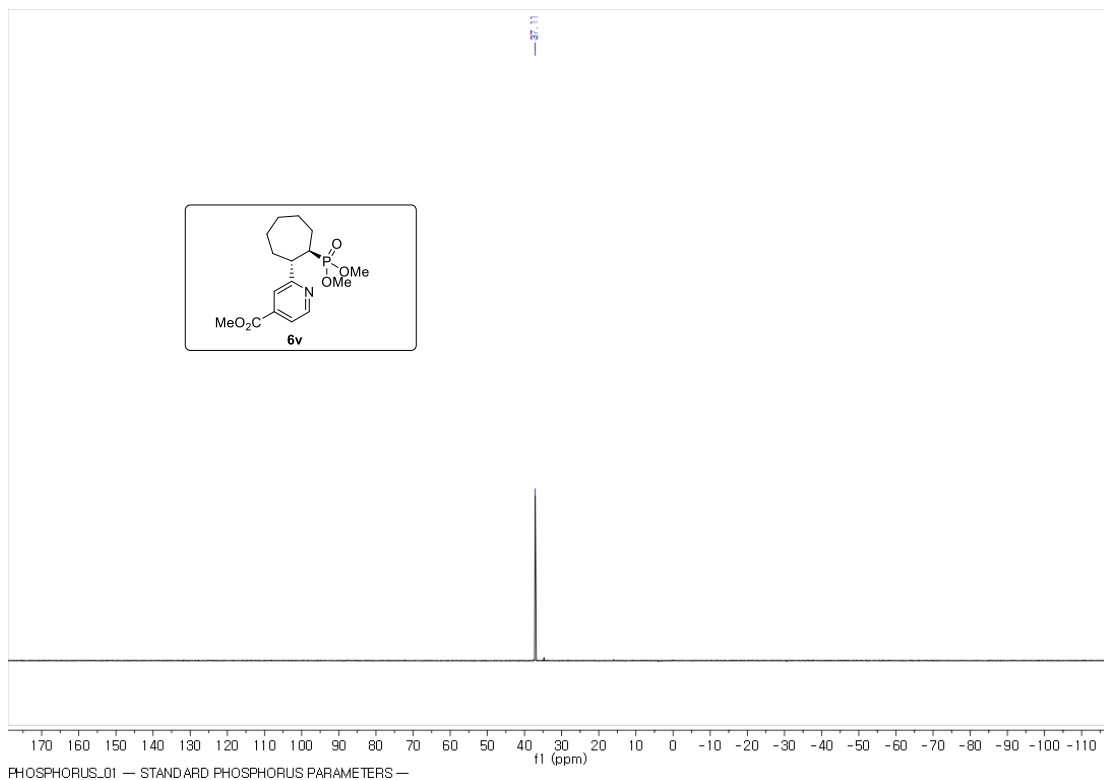

### 243 MHz, <sup>31</sup>P NMR in CDCl<sub>3</sub>

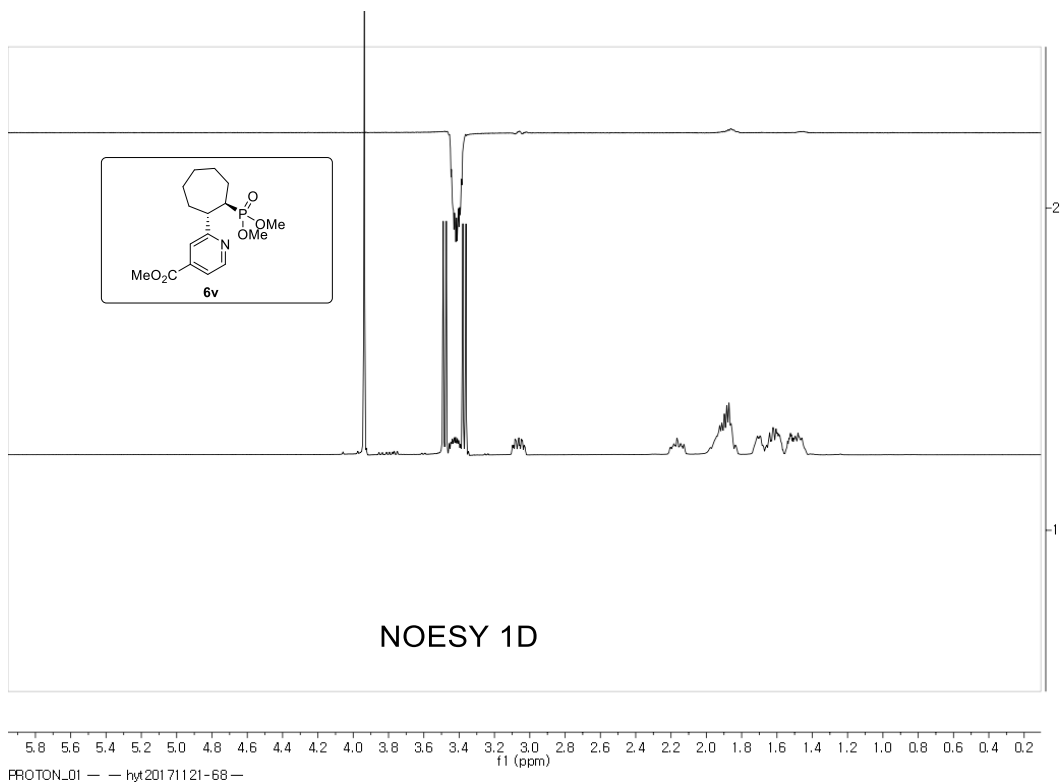

### NOESY 1D in CDCl<sub>3</sub>

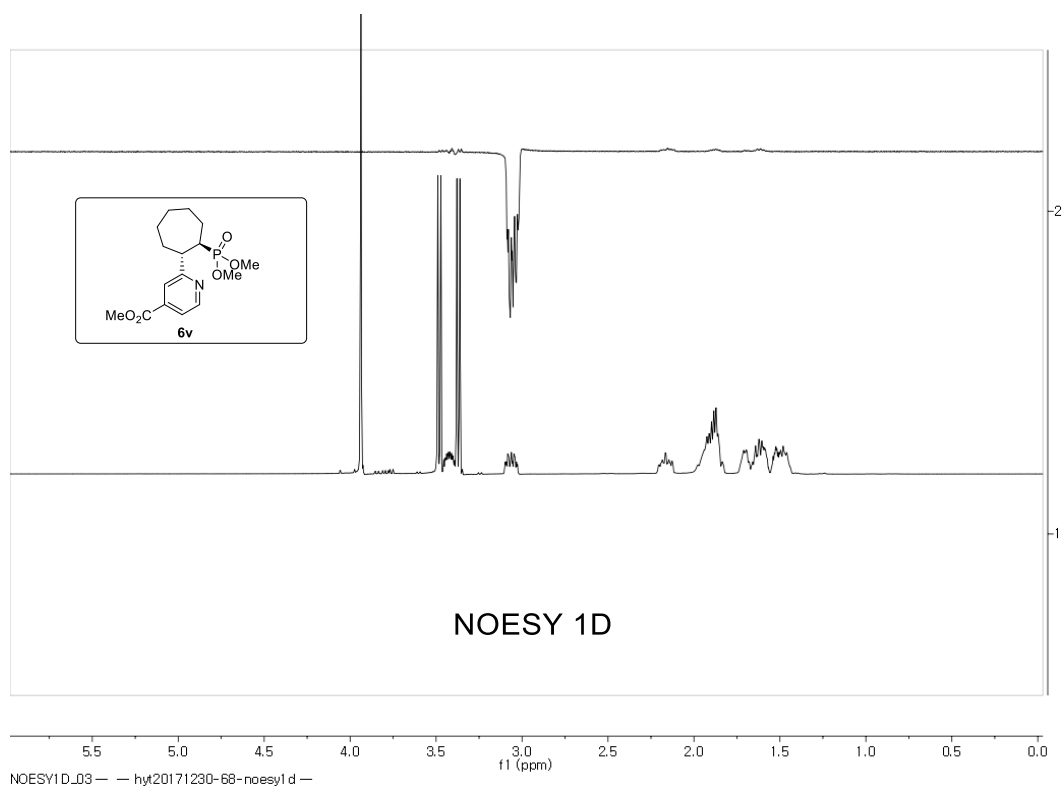

**NOESY 1D in CDCl<sub>3</sub>**



**methyl2-(1-(dimethoxyphosphoryl)-5-(((8R,9S,13S,14S)-13-methyl-17-oxo-7,8,9,11,12,13,14,15,16,17-decahydro-6H-cyclopenta[a]phenanthren-3-yl)oxy)pentan-2-yl)isonicotinate (6w).**

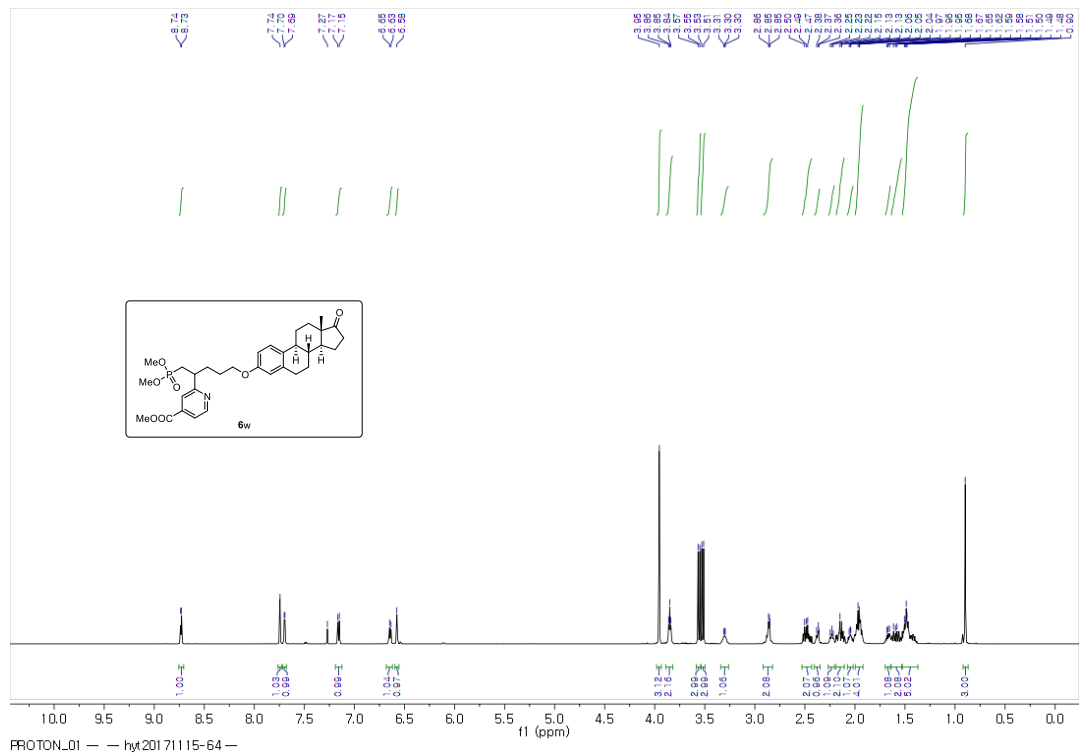

**600 MHz, <sup>1</sup>H NMR in CDCl<sub>3</sub>**

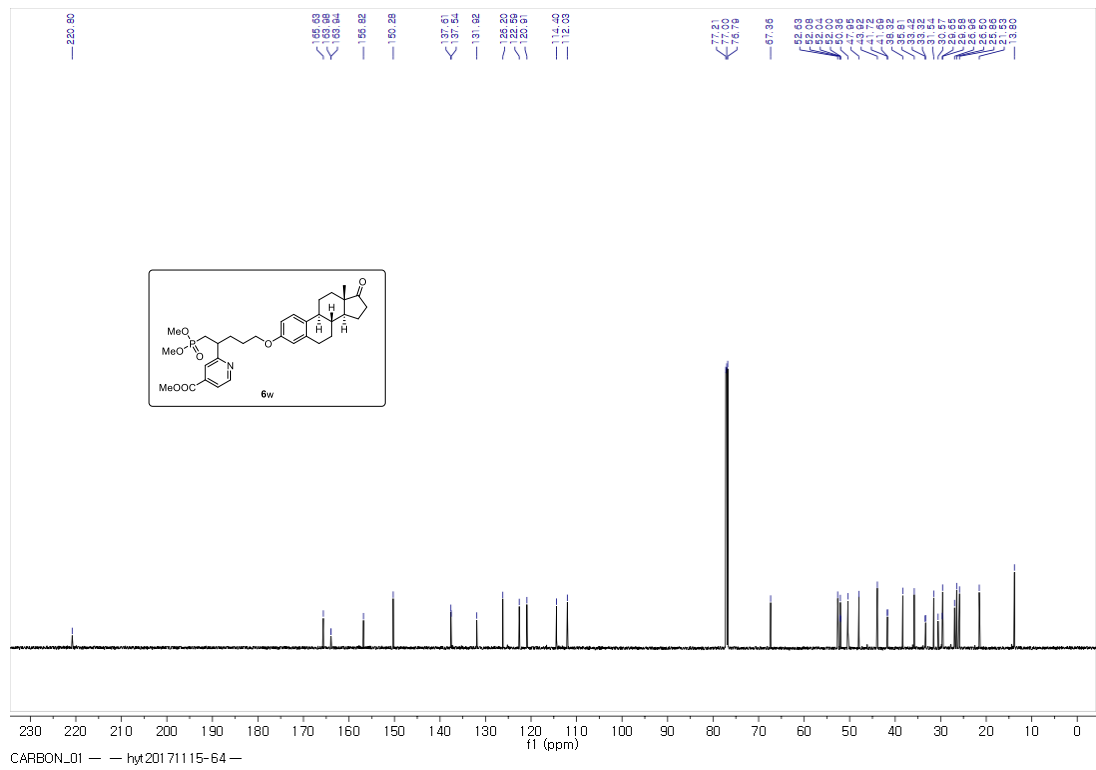

**150 MHz, <sup>13</sup>C NMR in CDCl<sub>3</sub>**

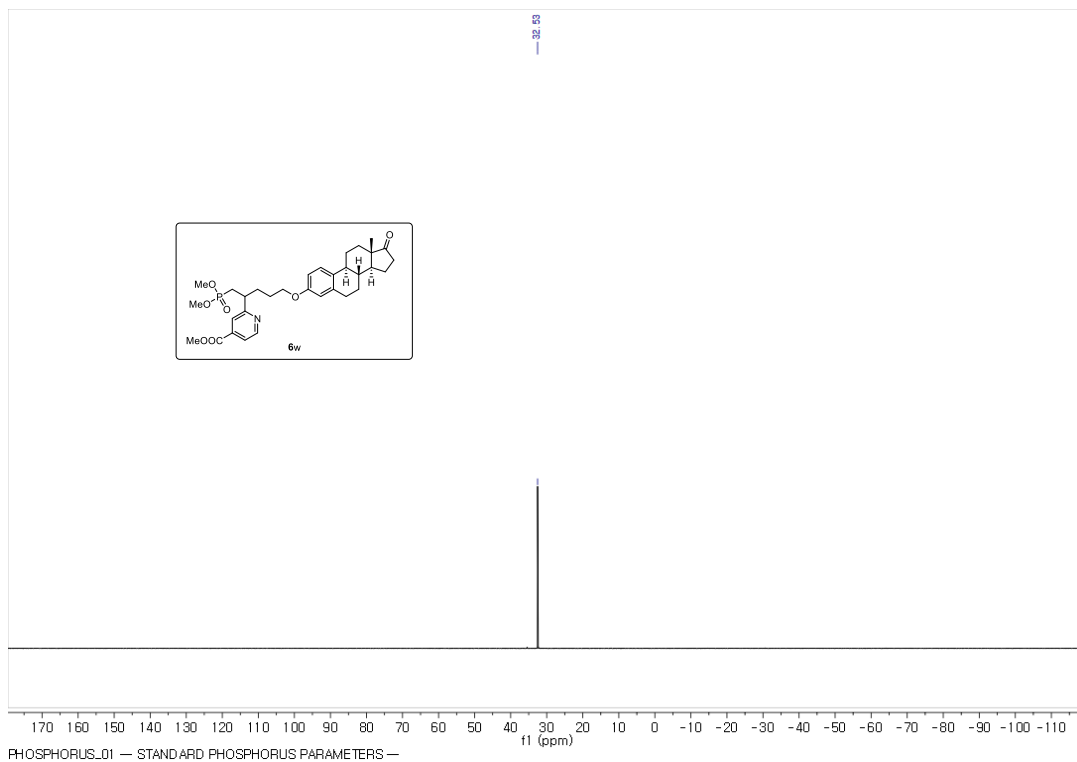

**243 MHz,  $^{31}\text{P}$  NMR in  $\text{CDCl}_3$**

**methyl 2-((8R,9S,13S,14S,16R,17R)-17-(dimethoxyphosphoryl)-3-methoxy-13-methyl-7,8,9,11,12,13,14,15,16,17-decahydro-6H-cyclopenta[a]phenanthren-16-yl)isonicotinate (6x)**

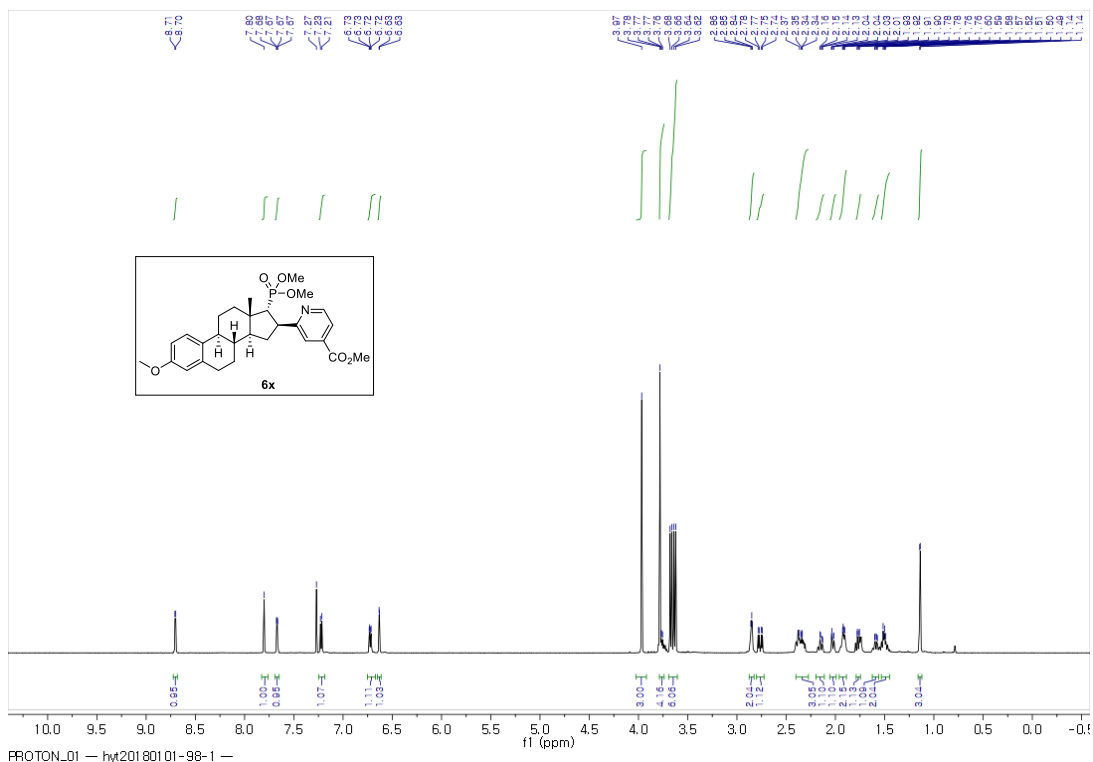

**600 MHz, <sup>1</sup>H NMR in CDCl<sub>3</sub>**

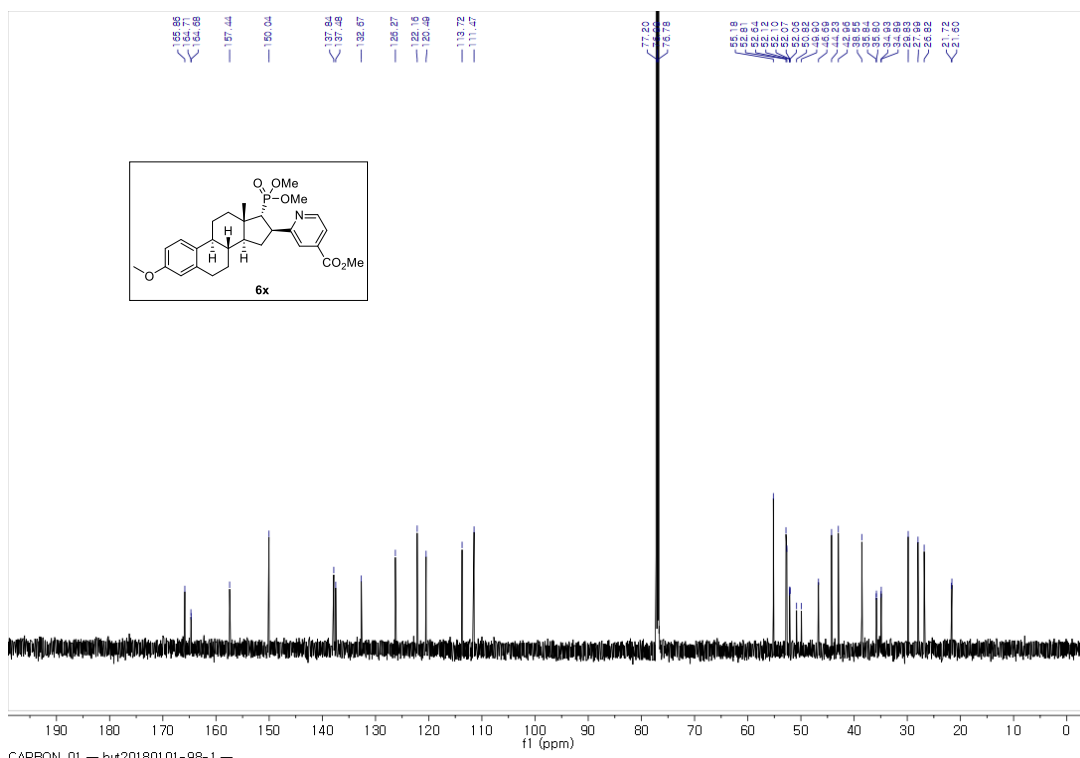

**150 MHz, <sup>13</sup>C NMR in CDCl<sub>3</sub>**

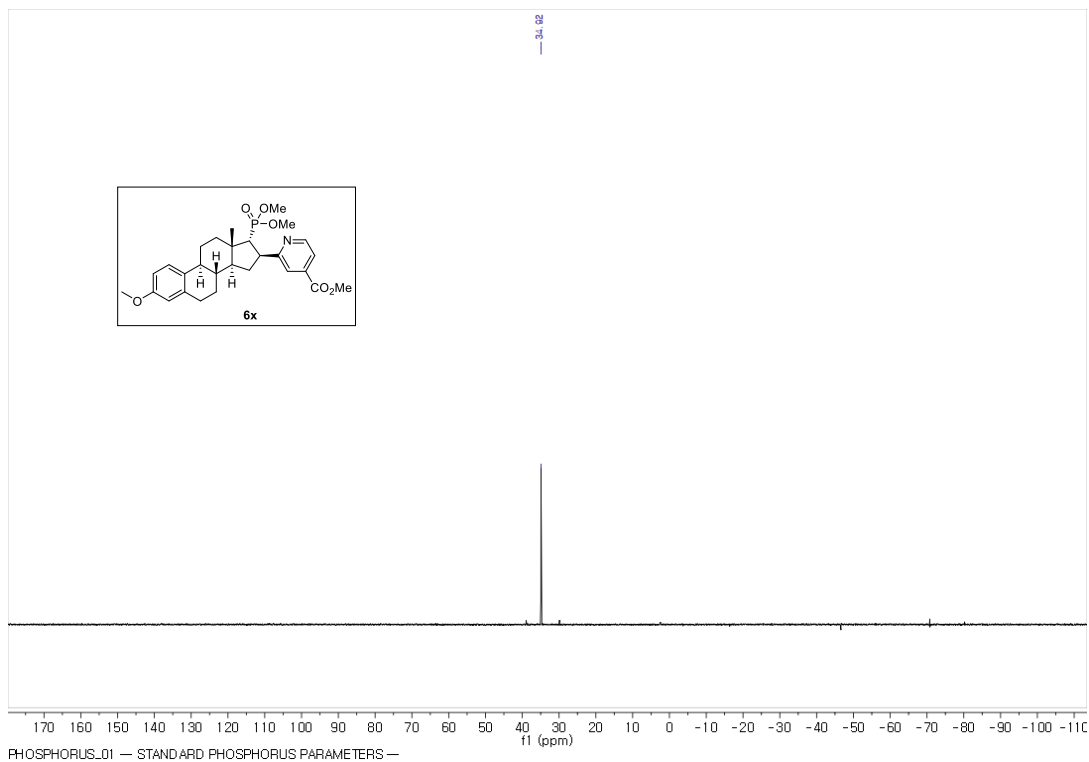

**243 MHz, <sup>31</sup>P NMR in CDCl<sub>3</sub>**

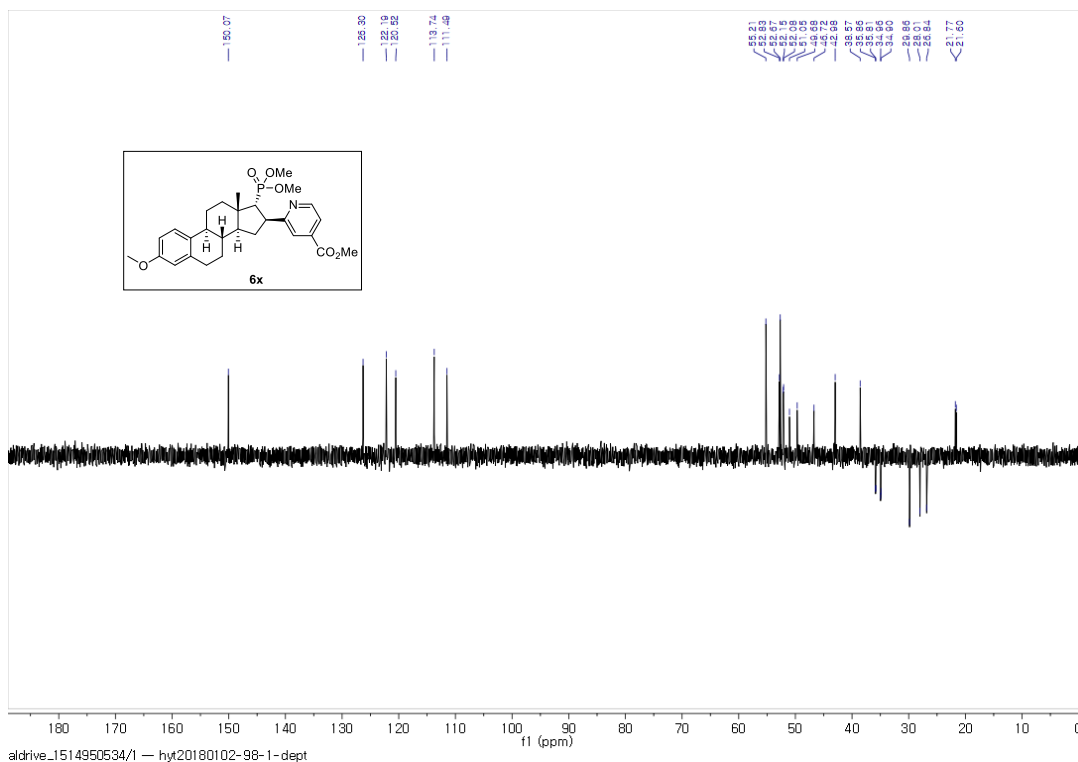

**DEPT135 in CDCl<sub>3</sub>**

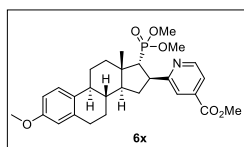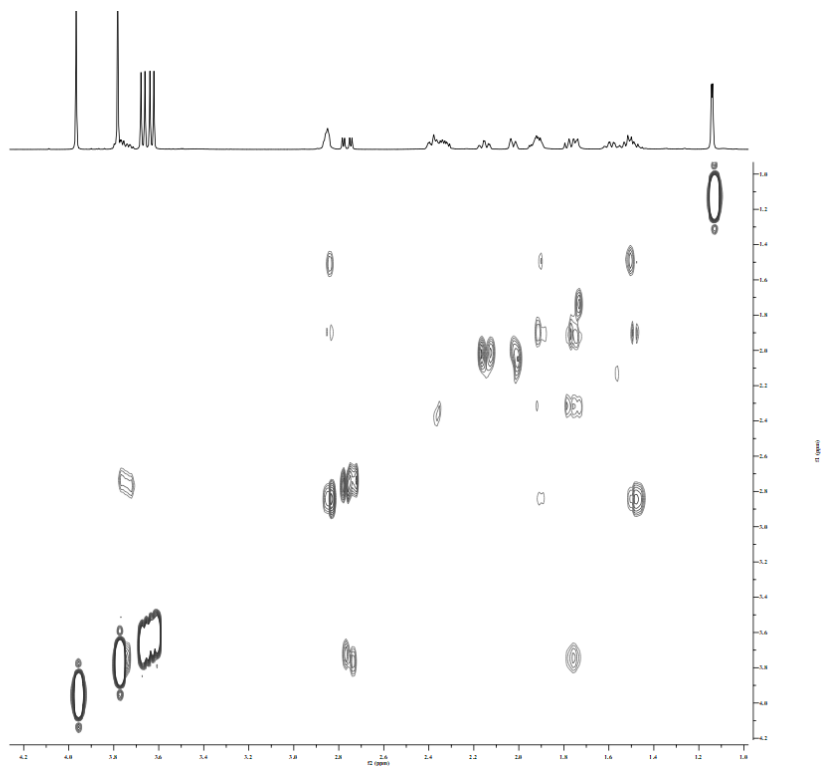

**COSY in CDCl<sub>3</sub>**

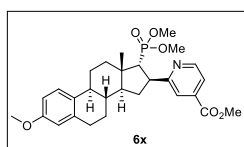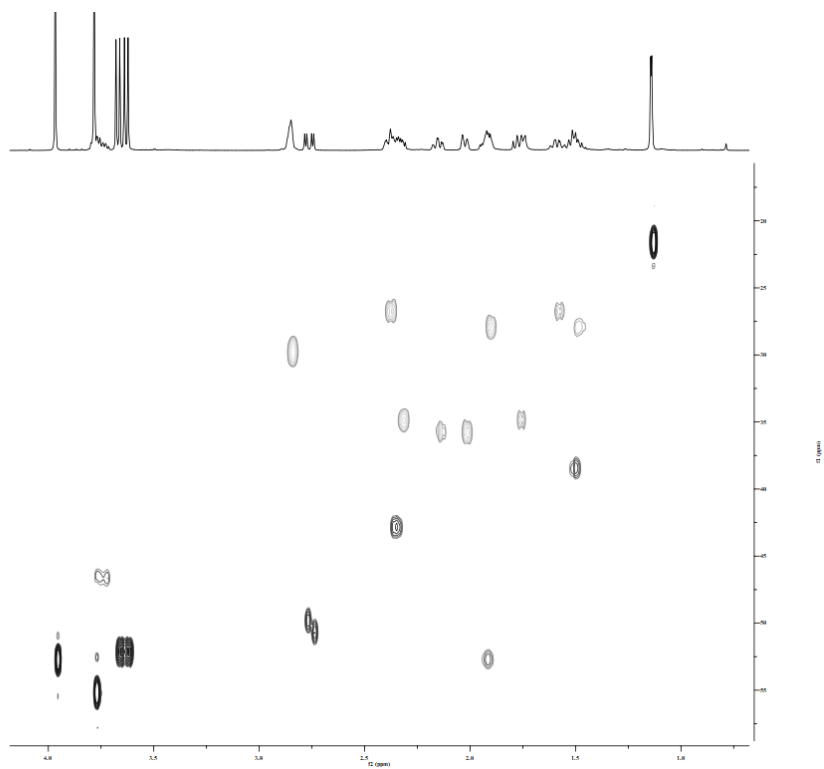

**HSQC in CDCl<sub>3</sub>**

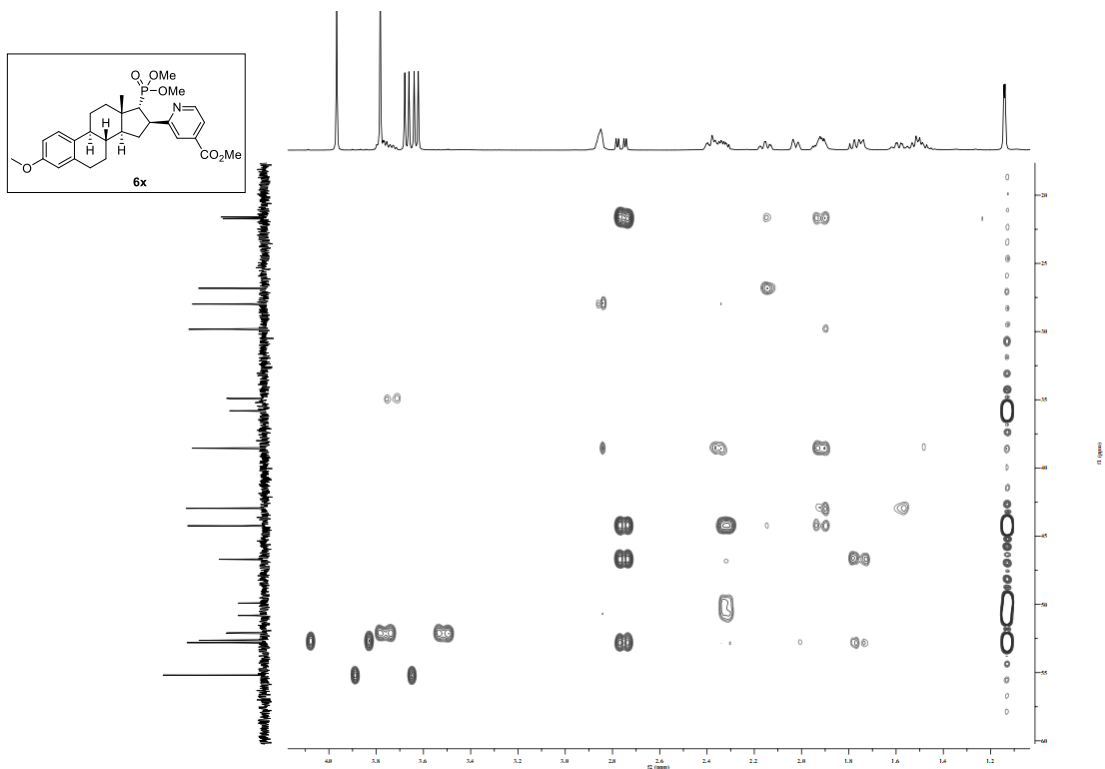

HMBC in  $\text{CDCl}_3$

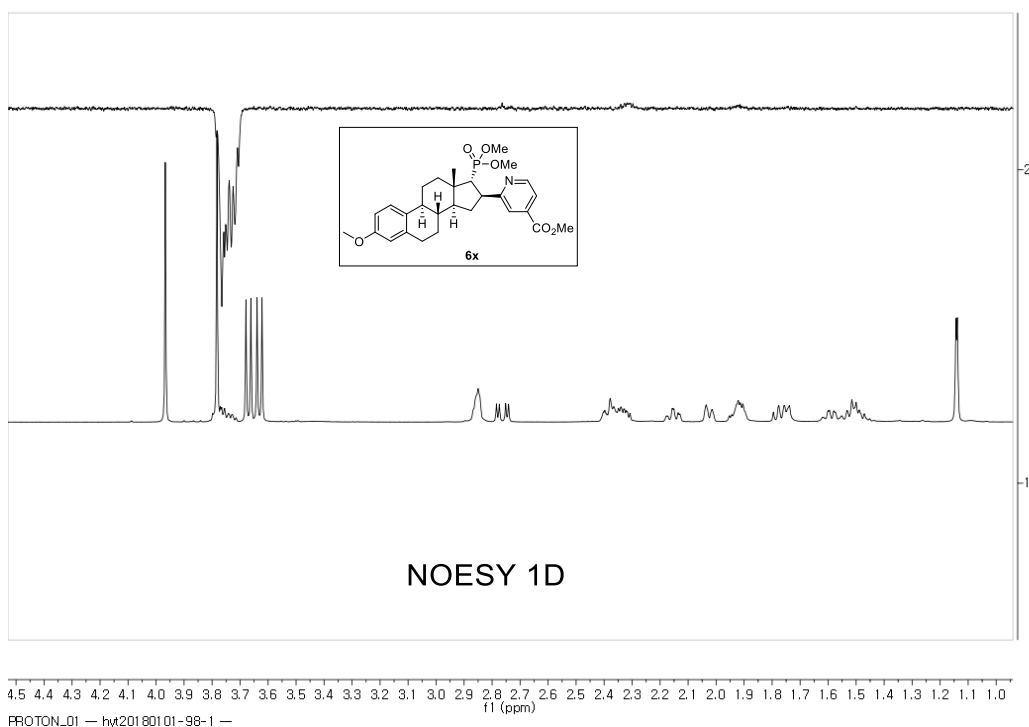

NOESY 1D in  $\text{CDCl}_3$

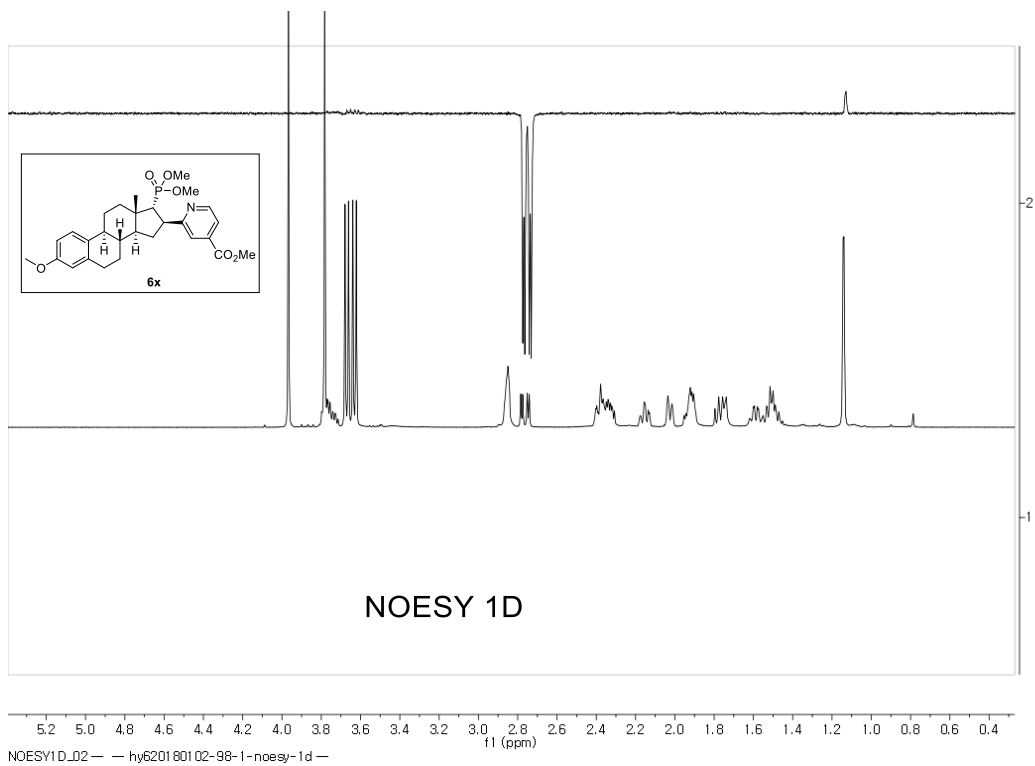

**NOESY 1D in CDCl<sub>3</sub>**

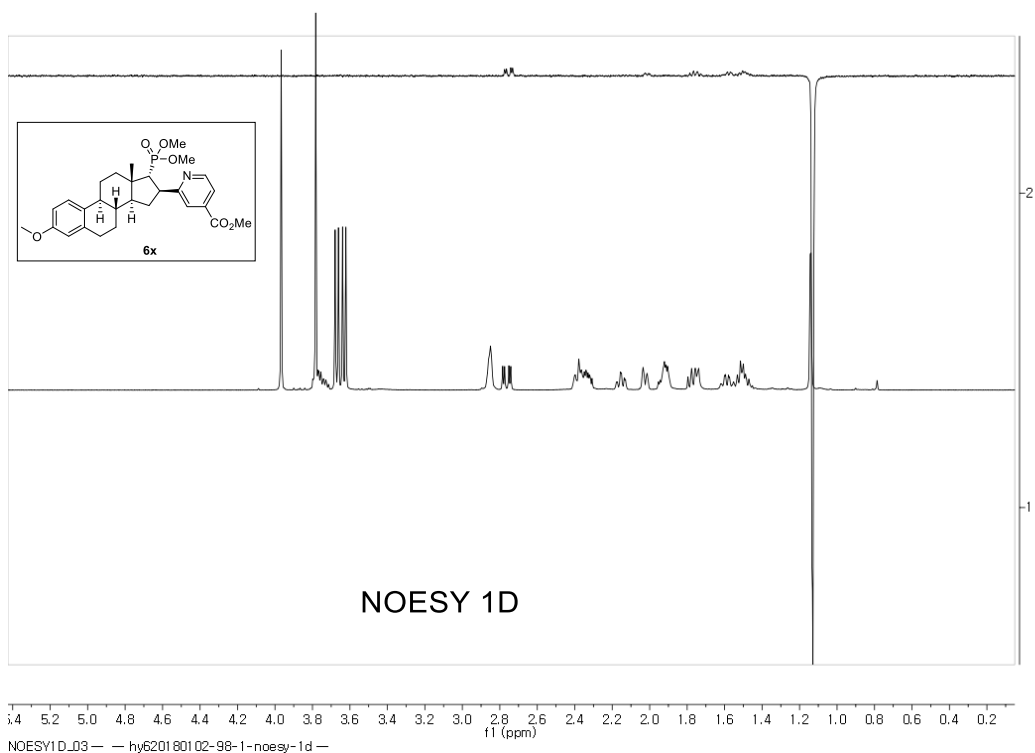

**NOESY 1D in CDCl<sub>3</sub>**

**methyl 2-((8S,9S,13S,14S,16R,17S)-16-(dimethoxyphosphoryl)-3-methoxy-13-methyl-7,8,9,11,12,13,14,15,16,17-decahydro-6H-cyclopenta[a]phenanthren-17-yl)isonicotinate (6x')**

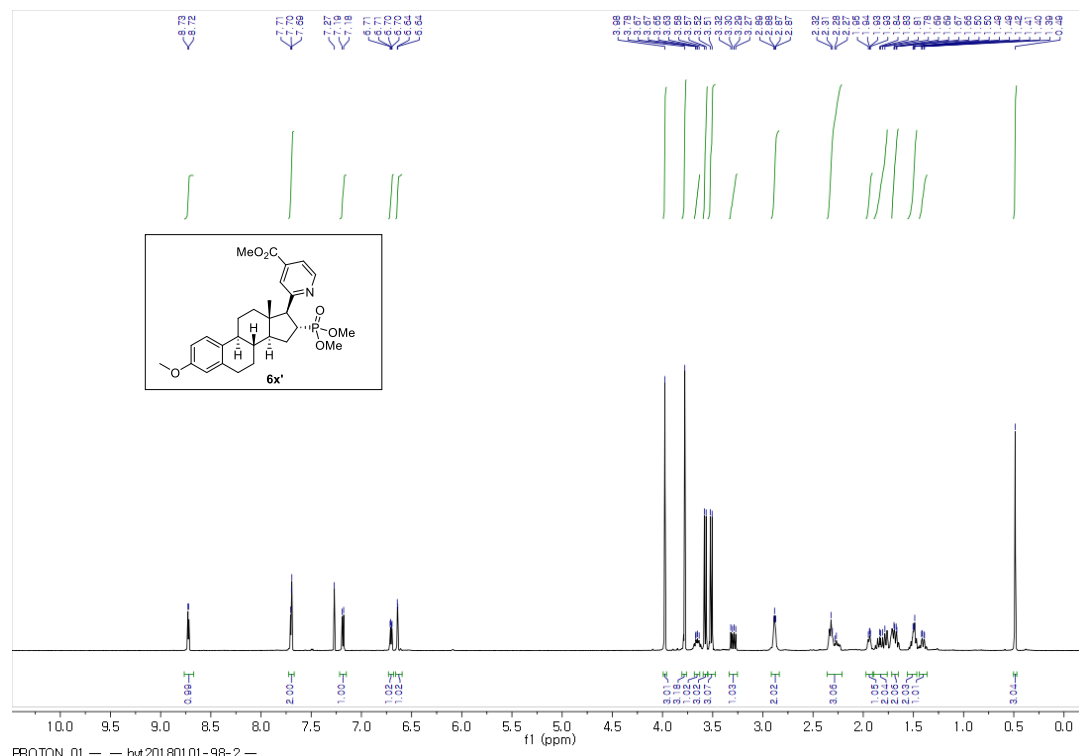

**600 MHz, <sup>1</sup>H NMR in CDCl<sub>3</sub>**

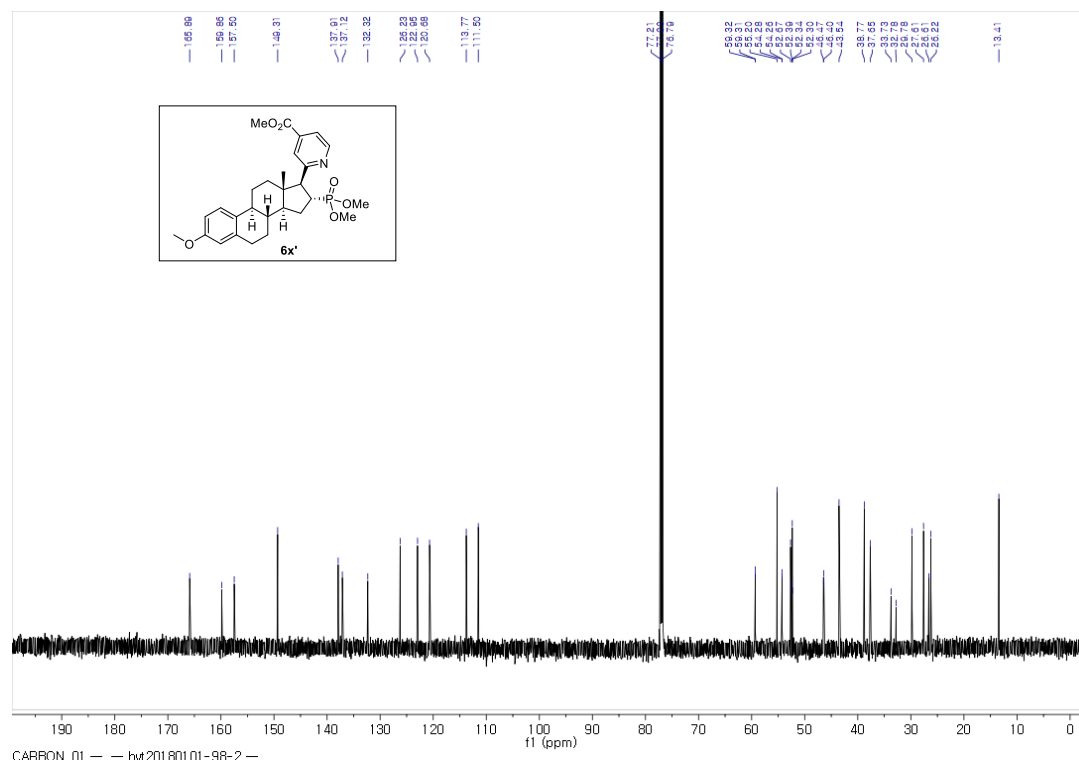

**150 MHz, <sup>13</sup>C NMR in CDCl<sub>3</sub>**



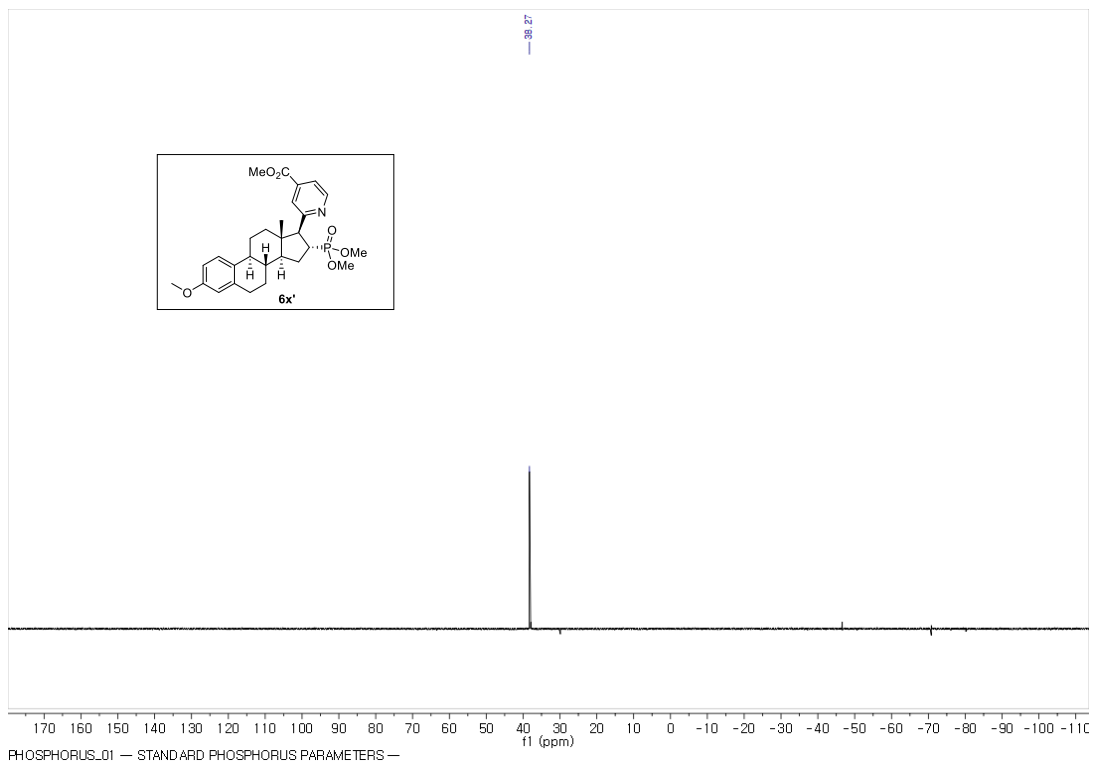

### 243 MHz, <sup>31</sup>P NMR in CDCl<sub>3</sub>

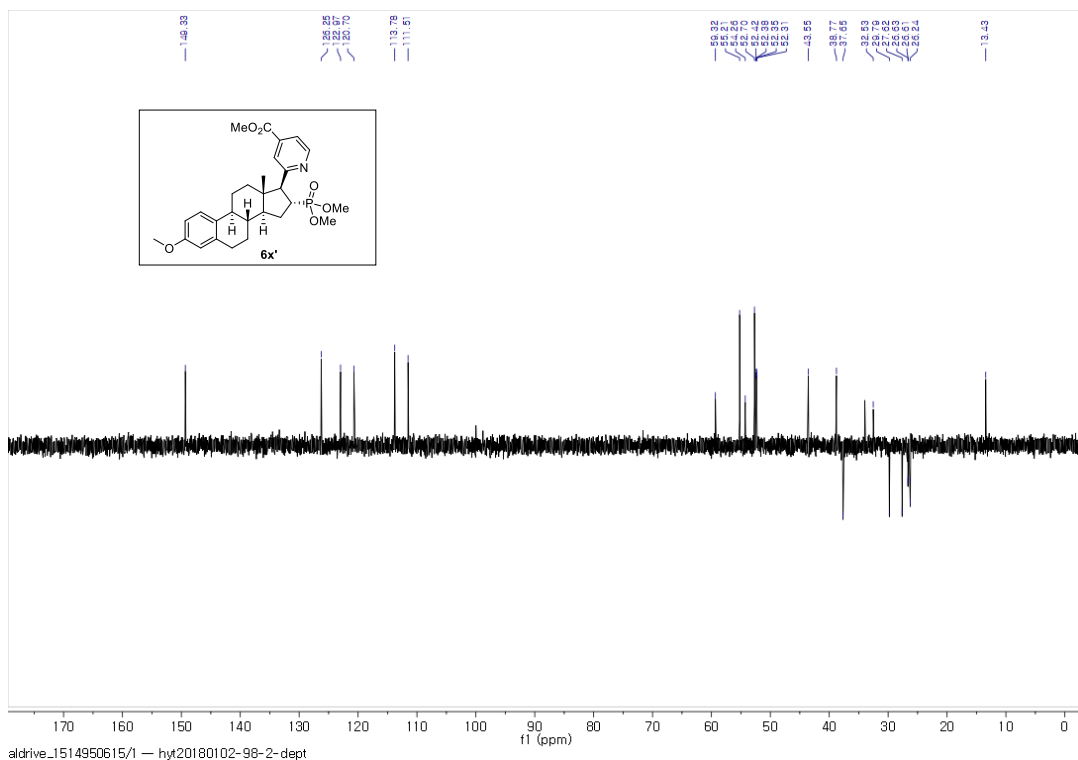

### DEPT135 in CDCl<sub>3</sub>

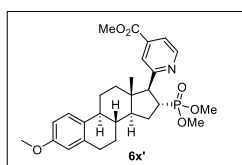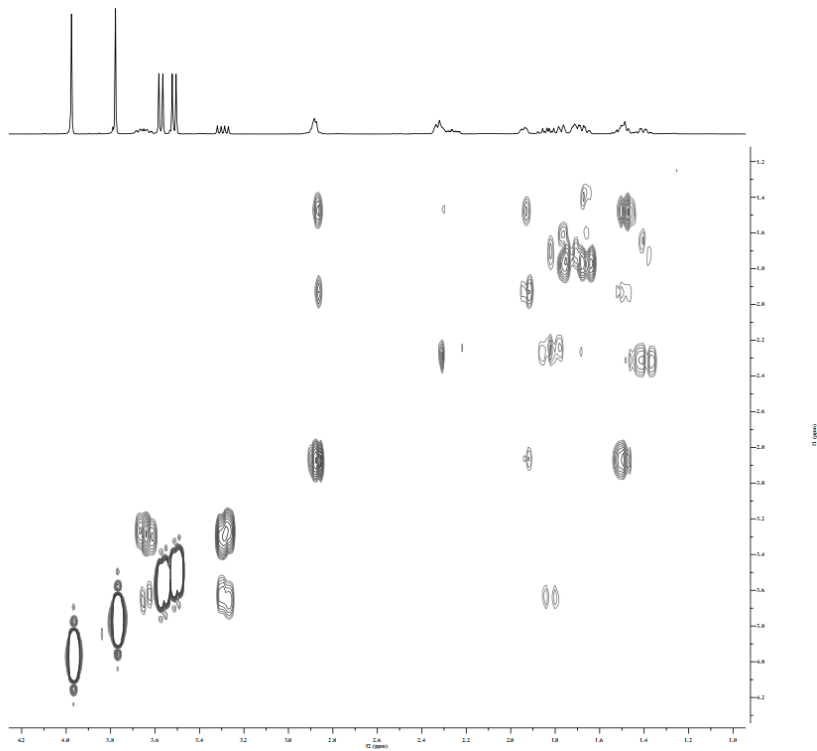

**COSY in  $\text{CDCl}_3$**

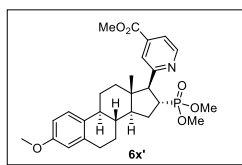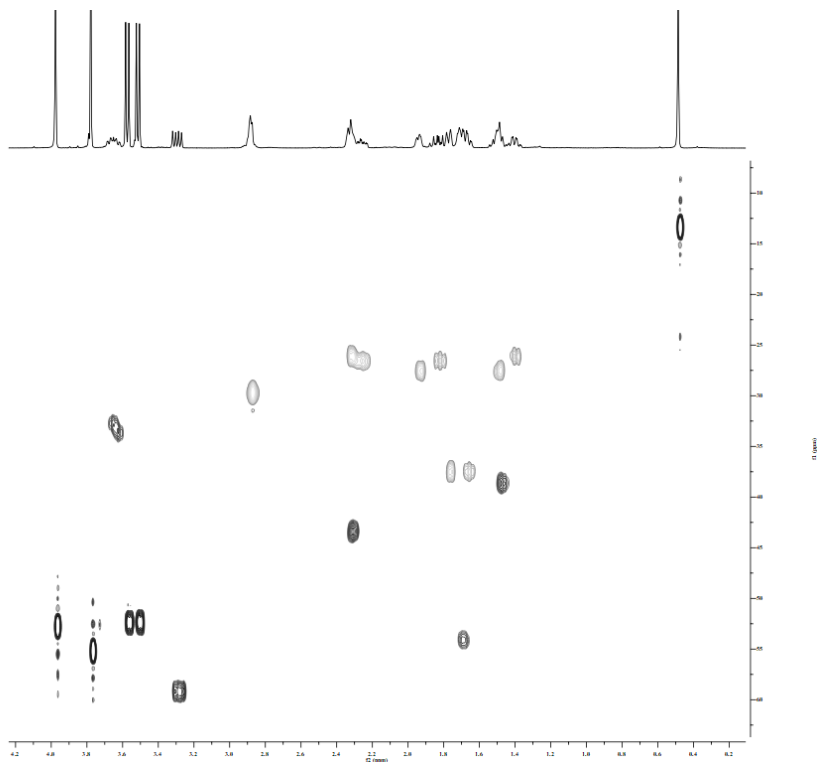

**HSQC in  $\text{CDCl}_3$**

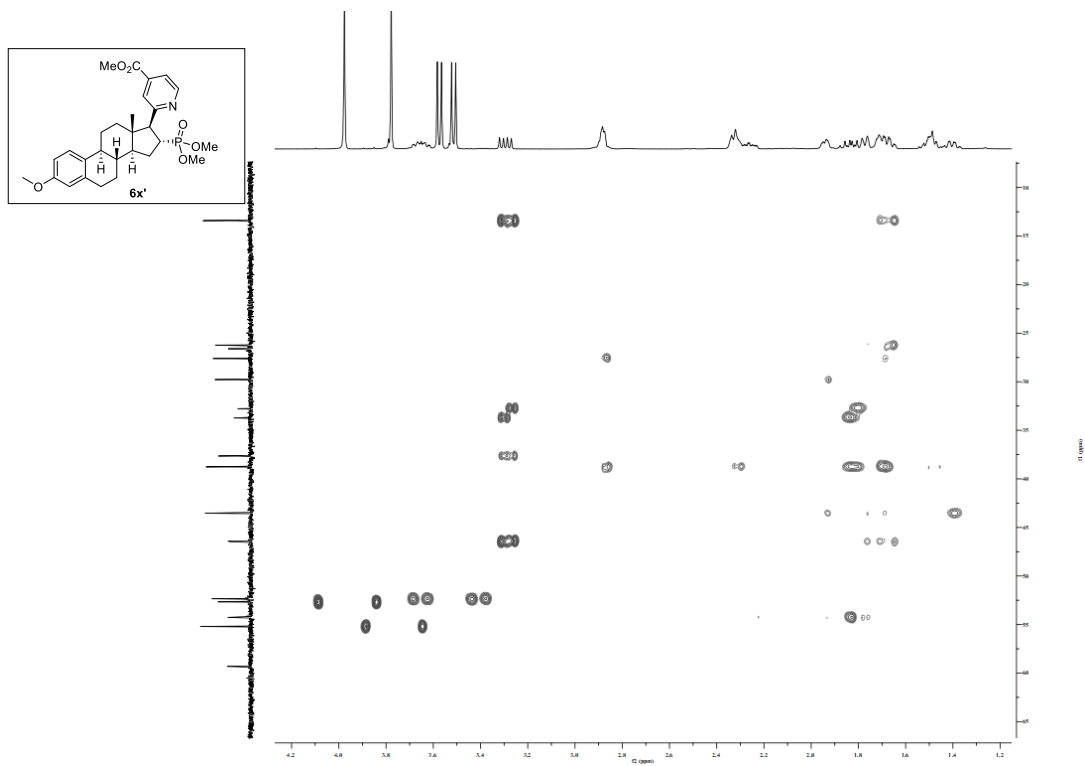

**HMBC in CDCl<sub>3</sub>**

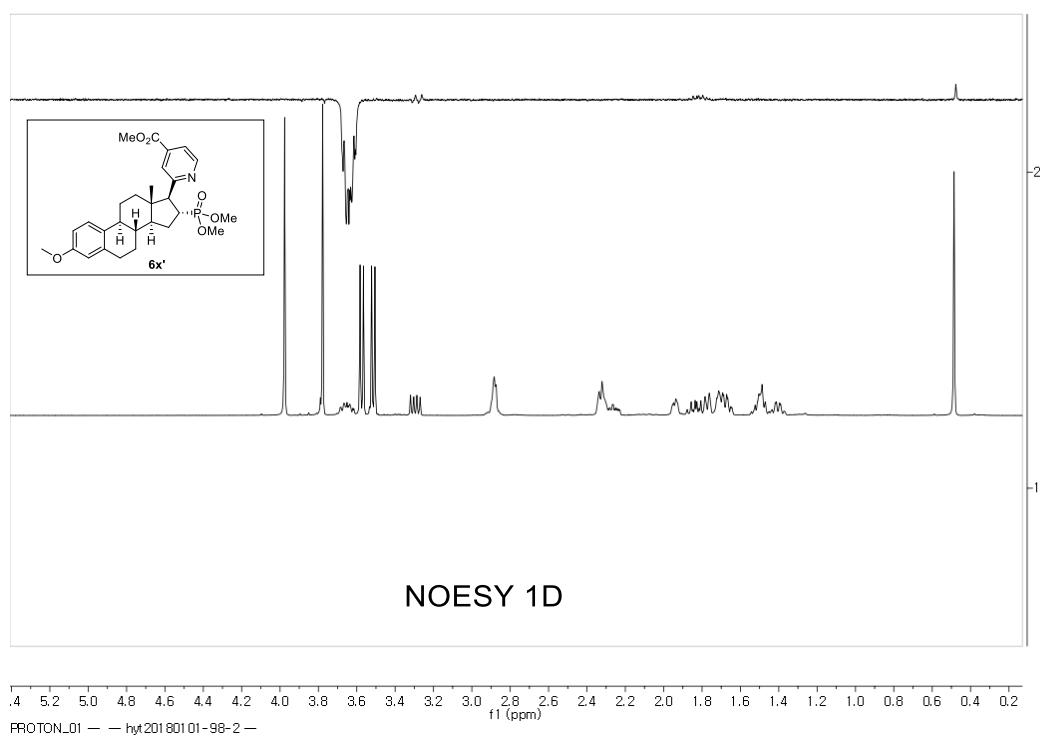

**NOESY 1D in CDCl<sub>3</sub>**

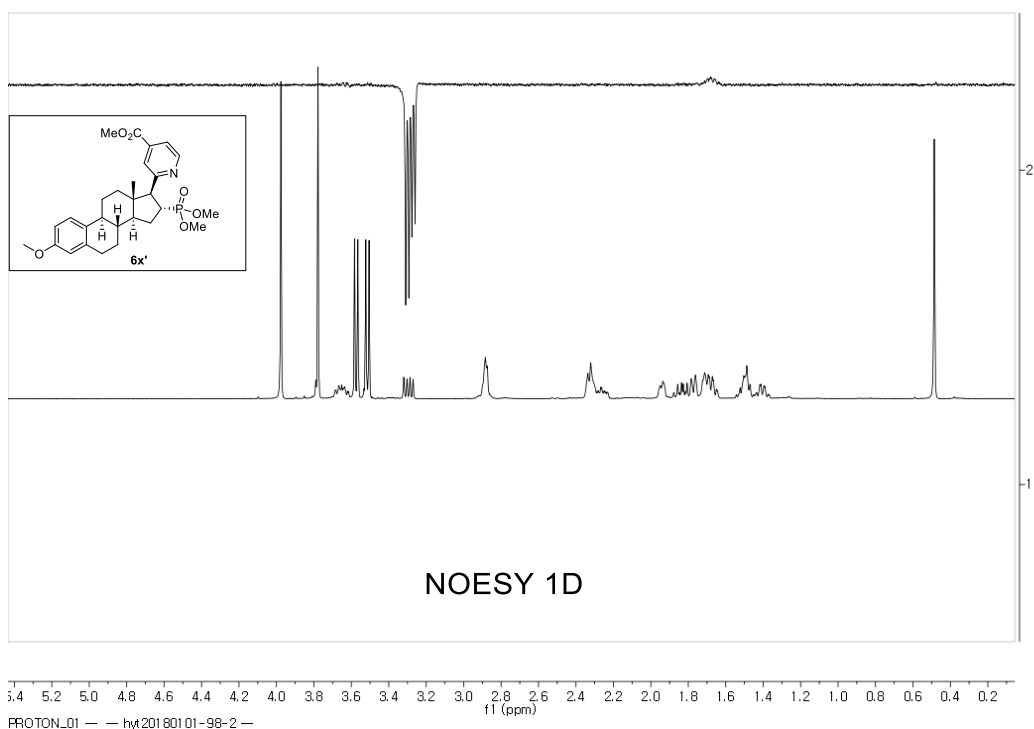

**NOESY 1D in CDCl<sub>3</sub>**

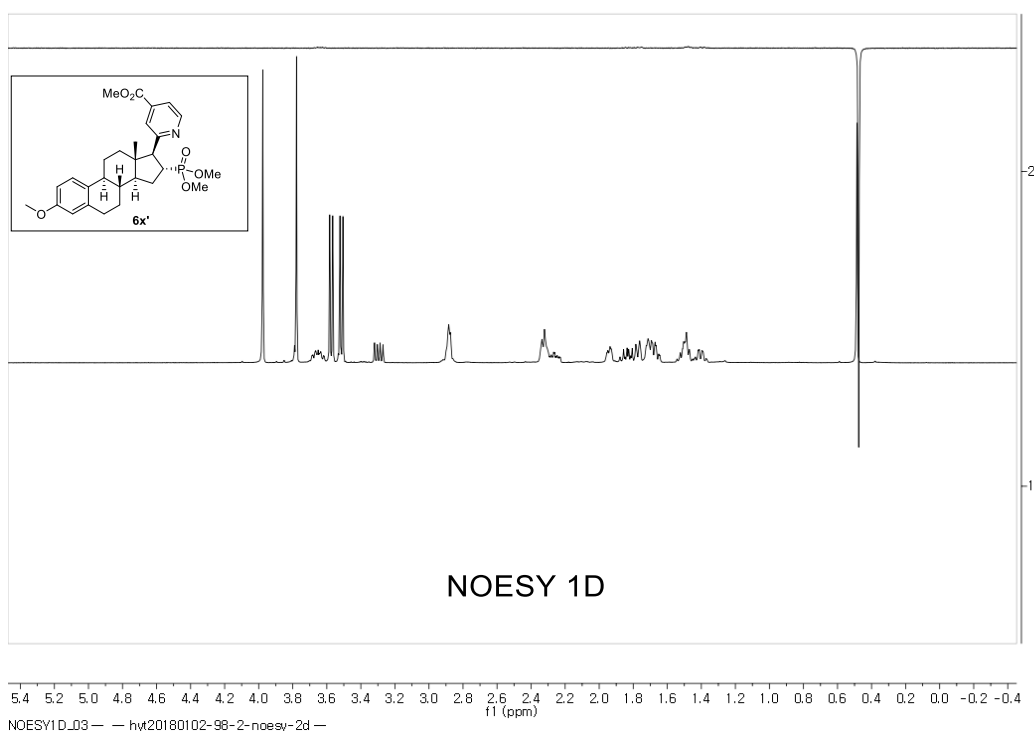

**NOESY 1D in CDCl<sub>3</sub>**

**2-(1-(dimethoxyphosphoryl)-5-((4-methoxybenzoyl)oxy)pentan-2-yl)-4-(methoxycarbonyl)pyridine 1-oxide (9)**

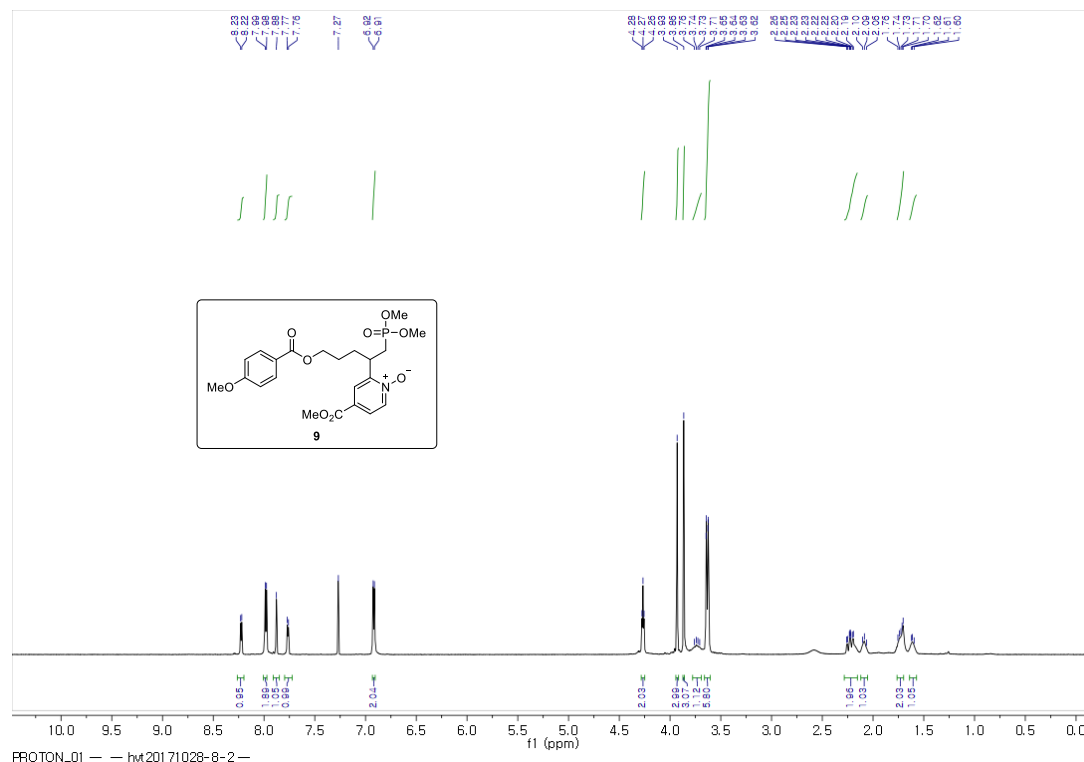

**600 MHz, <sup>1</sup>H NMR in CDCl<sub>3</sub>**

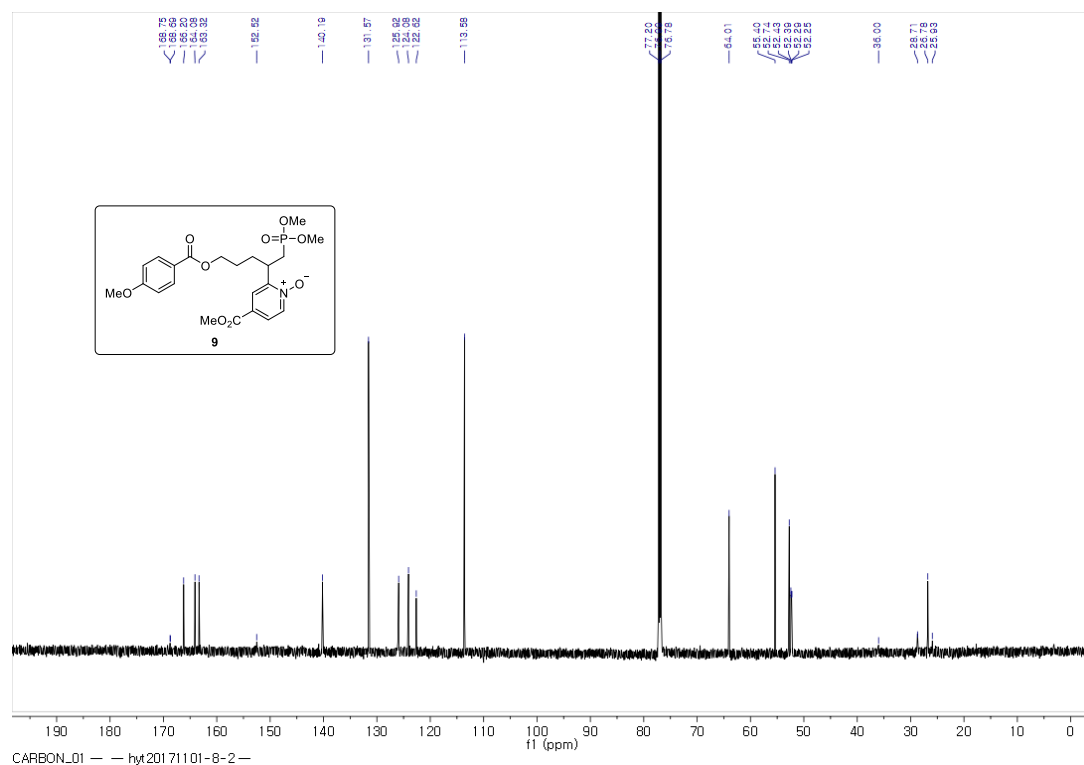

**150 MHz, <sup>13</sup>C NMR in CDCl<sub>3</sub>**

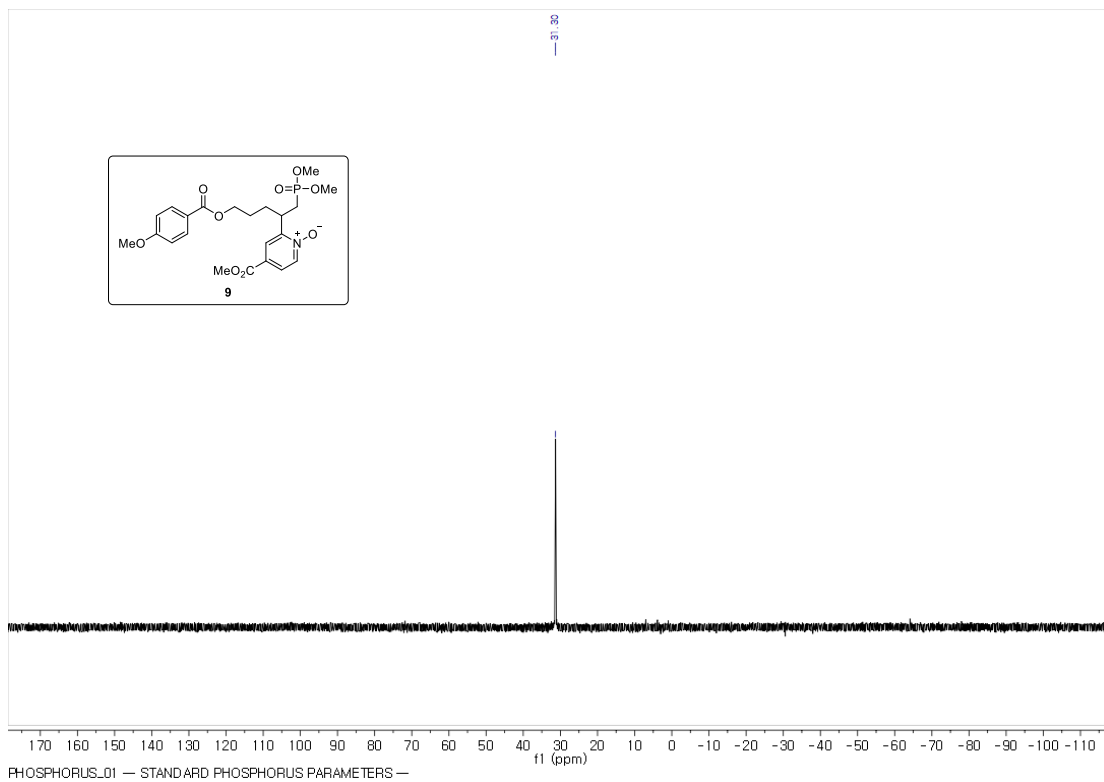

243 MHz, <sup>31</sup>P NMR in CDCl<sub>3</sub>

diethyl (3R,4R)-3-((dimethoxyphosphoryl)methyl)-4-((4-(methoxycarbonyl)pyridin-2-yl)methyl)cyclopentane-1,1-dicarboxylate (11)

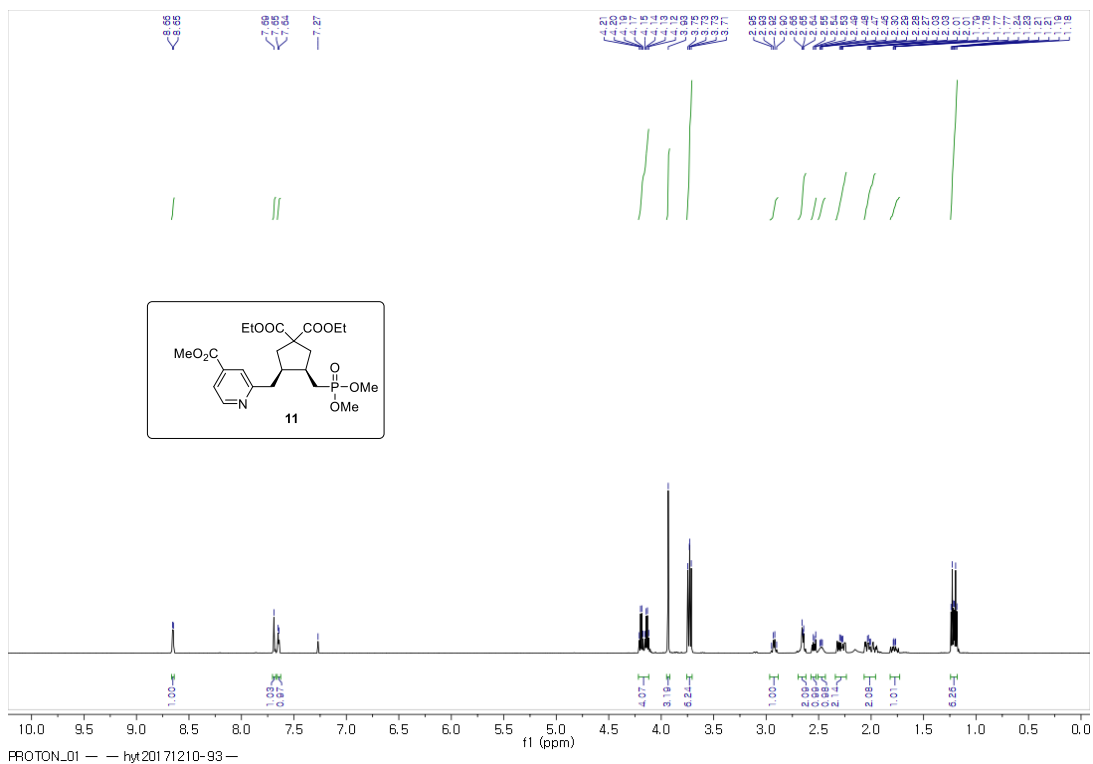

600 MHz, <sup>1</sup>H NMR in CDCl<sub>3</sub>

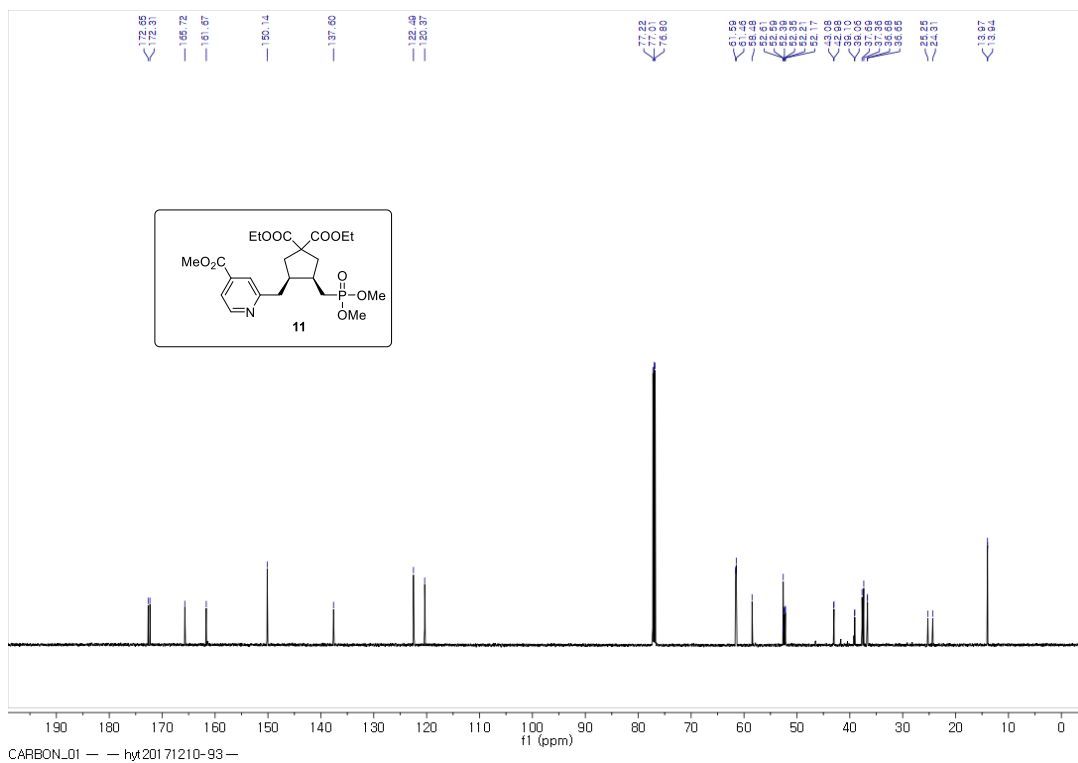

150 MHz, <sup>13</sup>C NMR in CDCl<sub>3</sub>

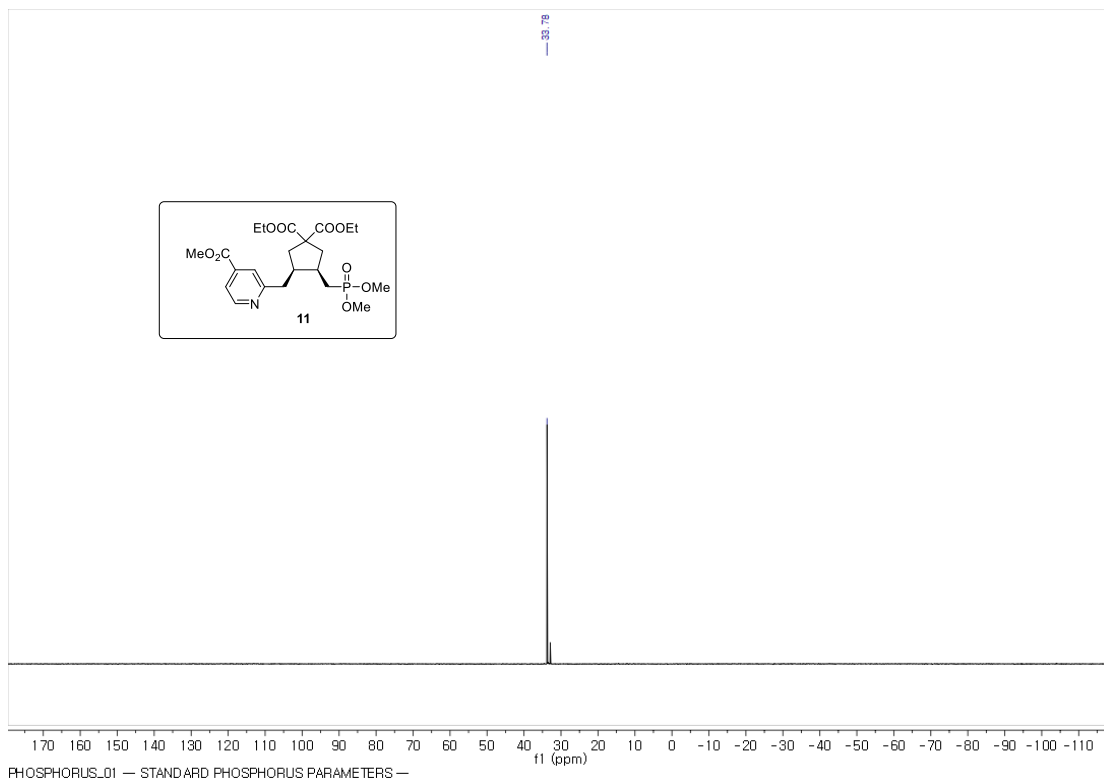

**243 MHz,  $^{31}\text{P}$  NMR in  $\text{CDCl}_3$**

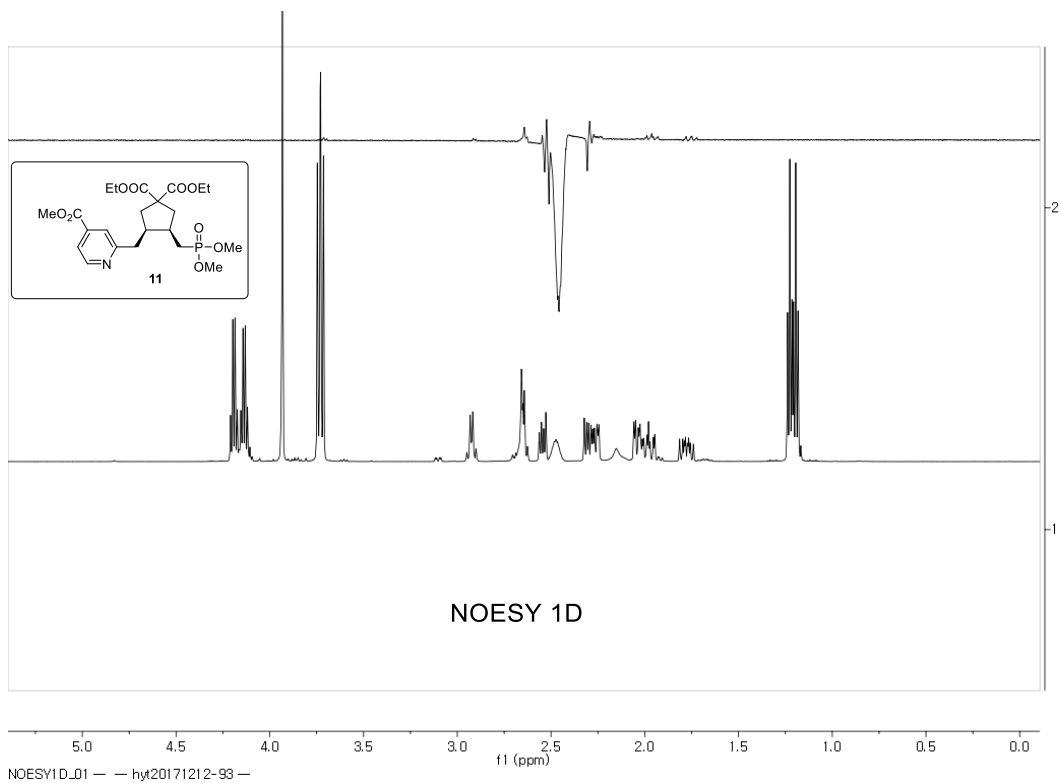

**NOESY 1D in  $\text{CDCl}_3$**



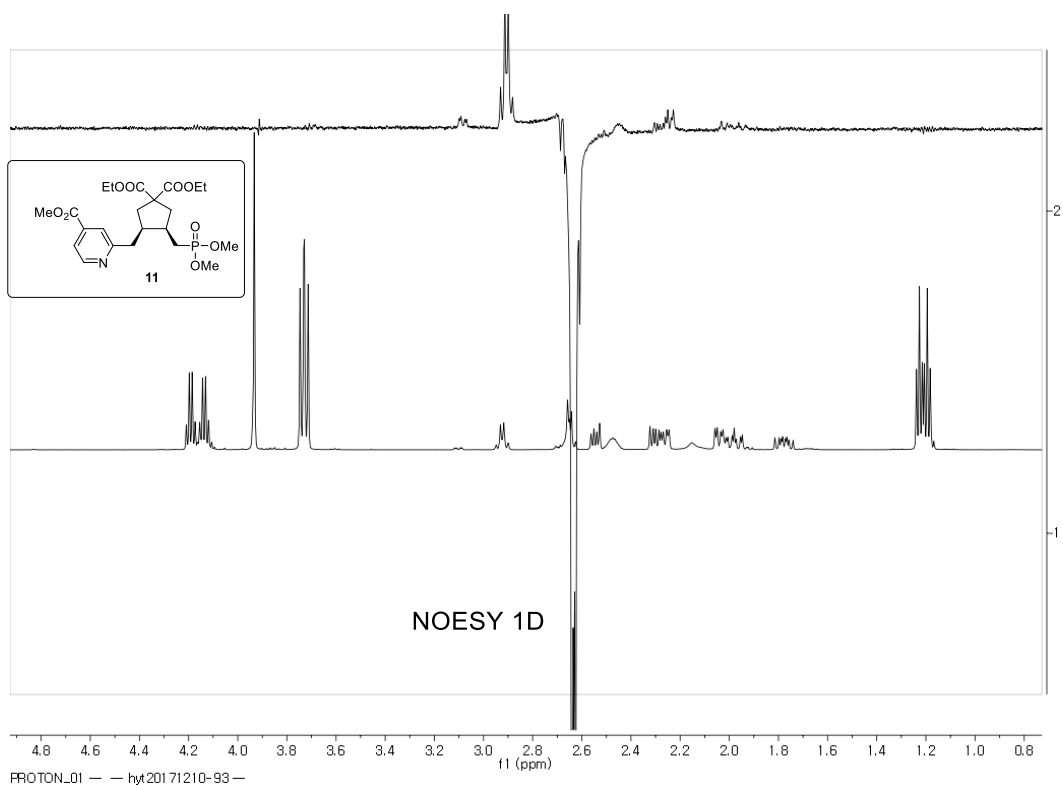

**NOESY 1D in CDCl<sub>3</sub>**

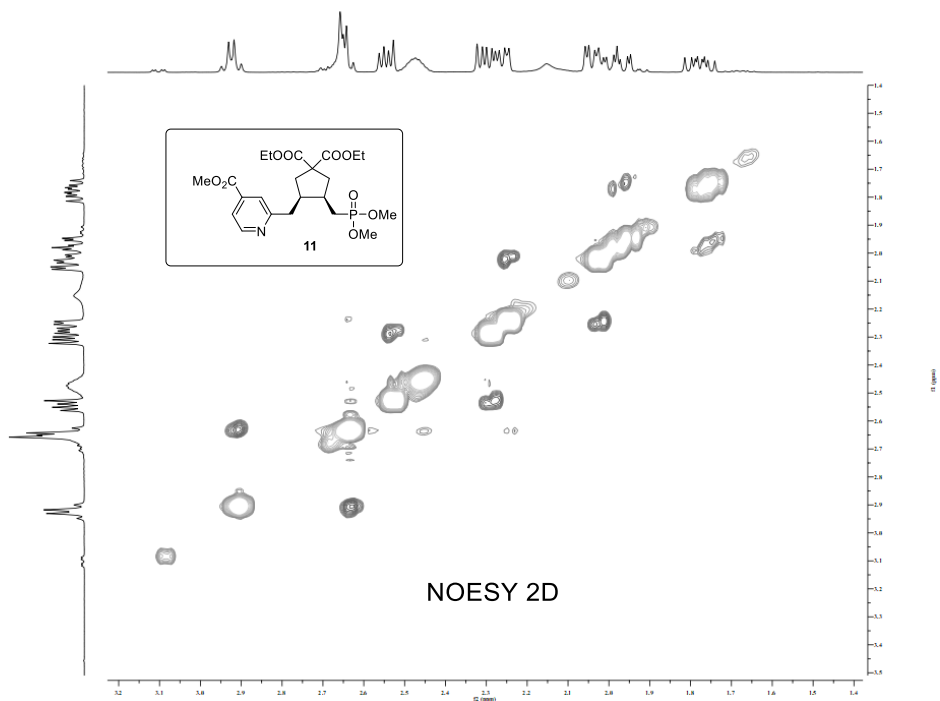

**NOESY 2D in CDCl<sub>3</sub>**

**methyl (Z)-2-(5-(dimethoxyphosphoryl)-4-phenylpent-3-en-1-yl)isonicotinate (13)**

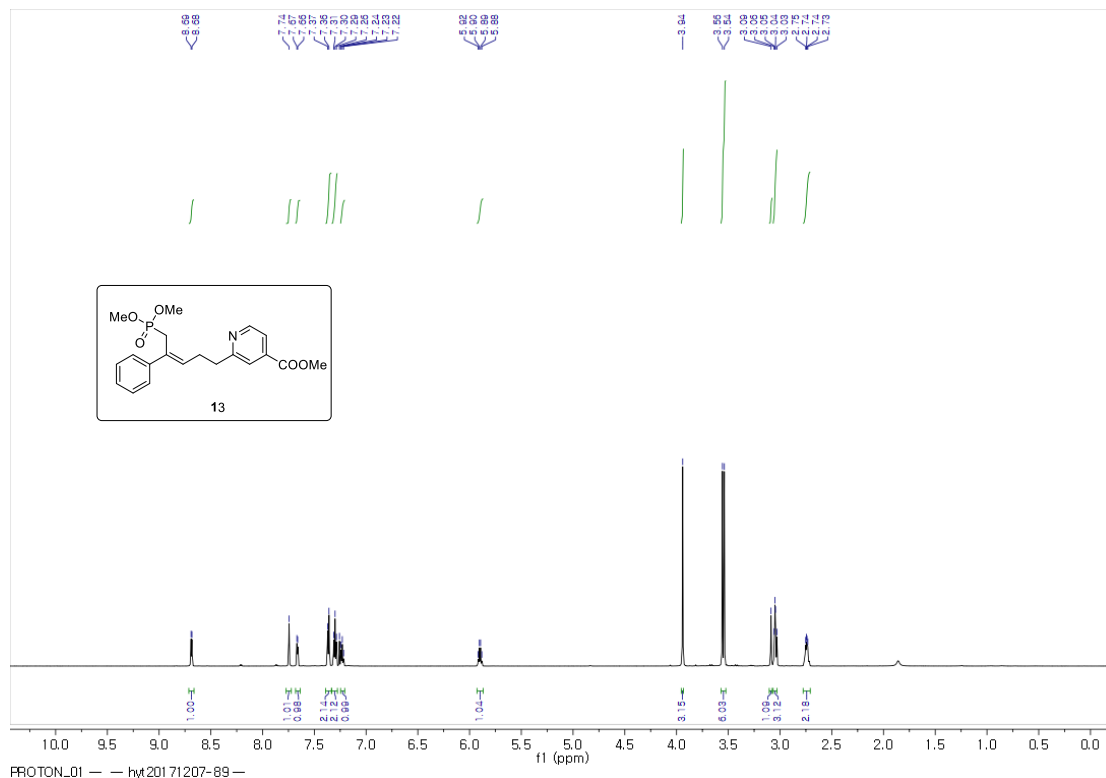

**600 MHz, <sup>1</sup>H NMR in CDCl<sub>3</sub>**

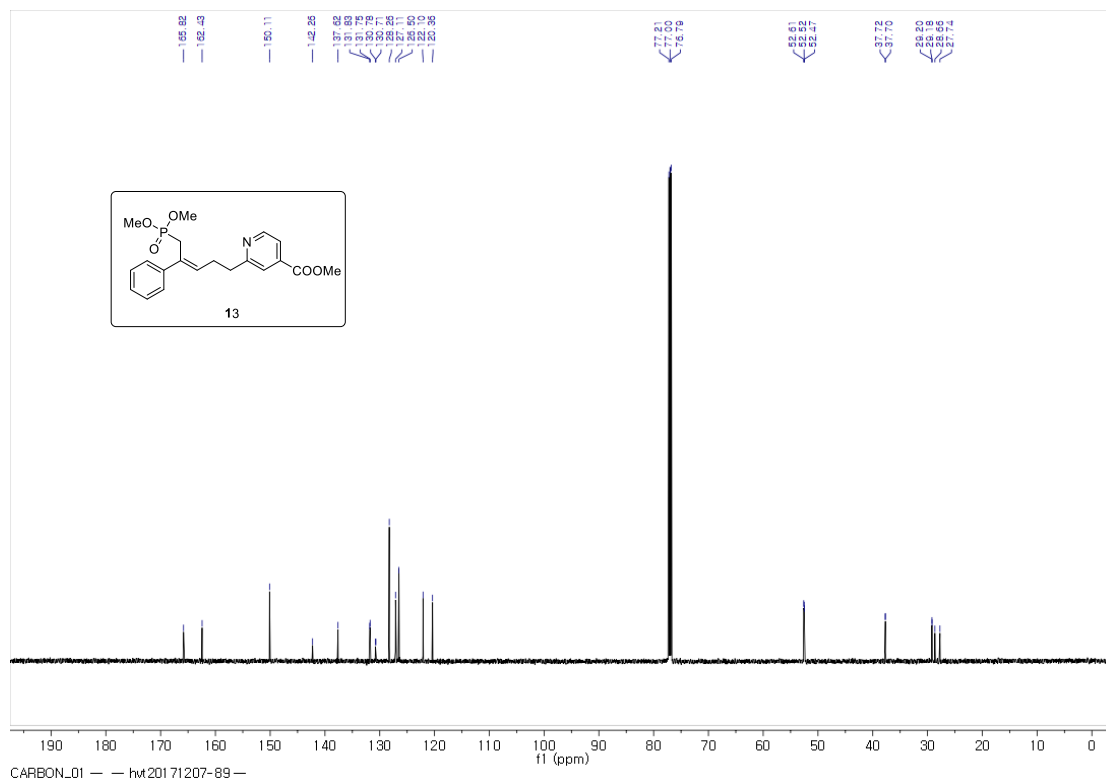

**150 MHz, <sup>13</sup>C NMR in CDCl<sub>3</sub>**

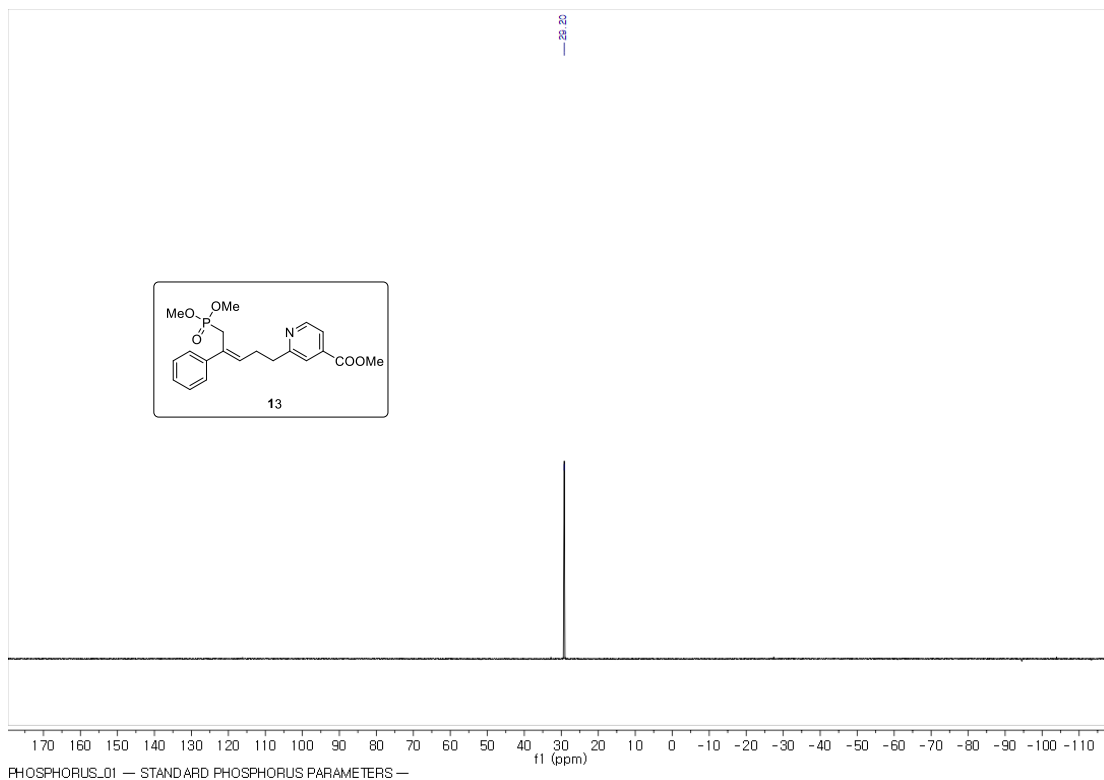

243 MHz,  $^{31}\text{P}$  NMR in  $\text{CDCl}_3$

### methyl 2-(dimethoxyphosphoryl)isonicotinate (14)

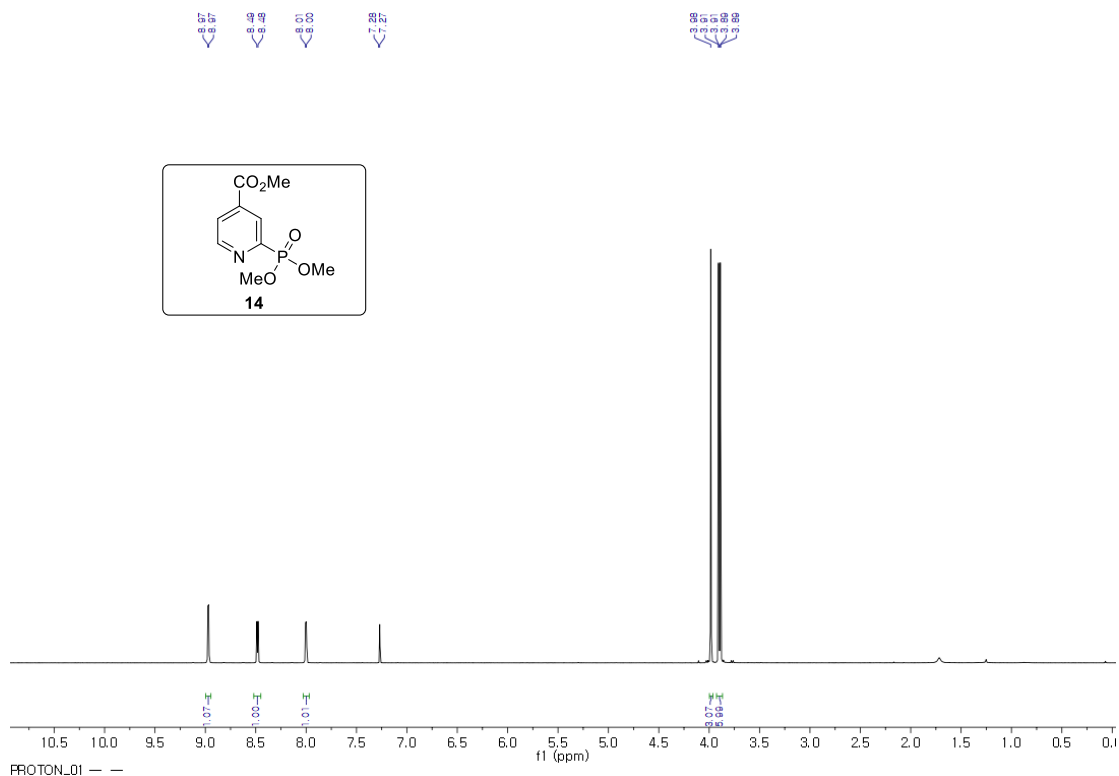

### 600 MHz, <sup>1</sup>H NMR in CDCl<sub>3</sub>

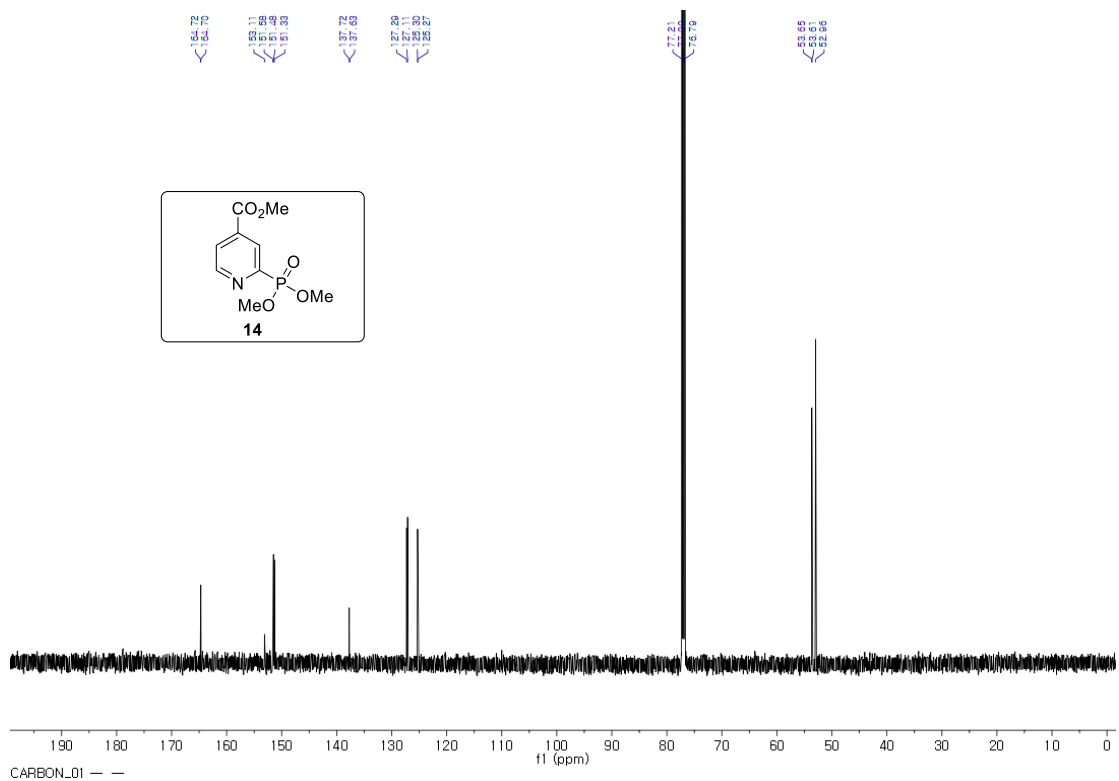

### 150 MHz, <sup>13</sup>C NMR in CDCl<sub>3</sub>

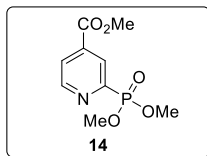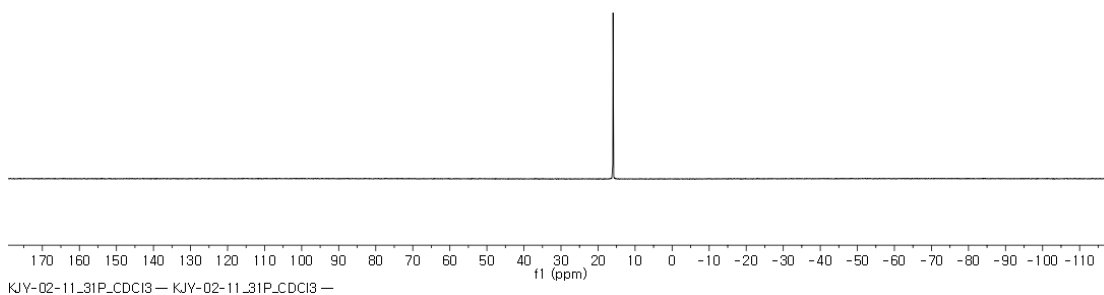

**243 MHz, <sup>31</sup>P NMR in CDCl<sub>3</sub>**
